# Supplementary material
Source: publisher figshare collection journal article supplement (https://acs.figshare.com/ndownloader/files/8853502)
Supplement: Supplementary file 1 [file 8853502]

data_ijsf1413
_publ_requested_journal          'ACS Catalysis'
_publ_contact_author_name        'Professor Ian J.S. Fairlamb'
_publ_contact_author_address     
'Department of Chemistry,University of York, York, YO10 5DD, UK. '
_publ_contact_author_email       ian.fairlamb@york.ac.uk
loop_
_publ_author_name
_publ_author_address
'Fairlamb, Ian'
'Department of Chemistry,University of York, York, YO10 5DD, UK. '
'Reay, Alan J.'
'Department of Chemistry,University of York, York, YO10 5DD, UK. '
'Hammarback, L. Anders'
'Department of Chemistry,University of York, York, YO10 5DD, UK. '
'Sheridan, Thomas'
'Department of Chemistry,University of York, York, YO10 5DD, UK. '
'Whitwood, Adrian C'
'Department of Chemistry,University of York, York, YO10 5DD, UK. '
_audit_creation_date             2017-04-24
_audit_creation_method           
;
Olex2 1.2
(compiled 2017.03.28 svn.r3405 for OlexSys, GUI svn.r5335)
;
_shelx_SHELXL_version_number     2014/7
_publ_contact_author_id_orcid    ?
_publ_section_references         
;
Dolomanov, O.V., Bourhis, L.J., Gildea, R.J, Howard, J.A.K. & Puschmann, H.
 (2009), J. Appl. Cryst. 42, 339-341.

Sheldrick, G.M. (2008). Acta Cryst. A64, 112-122.

Sheldrick, G.M. (2015). Acta Cryst. C71, 3-8.
;
_chemical_name_common            ?
_chemical_name_systematic        ?
_chemical_formula_moiety         'C20 H20 N2 O3'
_chemical_formula_sum            'C20 H20 N2 O3'
_chemical_formula_weight         336.38
_chemical_absolute_configuration syn
_chemical_melting_point          ?

loop_
_atom_type_symbol
_atom_type_description
_atom_type_scat_dispersion_real
_atom_type_scat_dispersion_imag
_atom_type_scat_source
C C 0.0033 0.0016 'International Tables Vol C Tables 4.2.6.8 and 6.1.1.4'
H H 0.0000 0.0000 'International Tables Vol C Tables 4.2.6.8 and 6.1.1.4'
N N 0.0061 0.0033 'International Tables Vol C Tables 4.2.6.8 and 6.1.1.4'
O O 0.0106 0.0060 'International Tables Vol C Tables 4.2.6.8 and 6.1.1.4'

_shelx_space_group_comment       
;
The symmetry employed for this shelxl refinement is uniquely defined
by the following loop, which should always be used as a source of
symmetry information in preference to the above space-group names.
They are only intended as comments.
;
_space_group_crystal_system      trigonal
_space_group_IT_number           146
_space_group_name_H-M_alt        'R 3'
_space_group_name_Hall           'R 3'
loop_
_space_group_symop_operation_xyz
'x, y, z'
'-y, x-y, z'
'-x+y, -x, z'
'x+2/3, y+1/3, z+1/3'
'-y+2/3, x-y+1/3, z+1/3'
'-x+y+2/3, -x+1/3, z+1/3'
'x+1/3, y+2/3, z+2/3'
'-y+1/3, x-y+2/3, z+2/3'
'-x+y+1/3, -x+2/3, z+2/3'

_cell_length_a                   21.2602(5)
_cell_length_b                   21.2602(5)
_cell_length_c                   10.1814(3)
_cell_angle_alpha                90
_cell_angle_beta                 90
_cell_angle_gamma                120
_cell_volume                     3985.4(2)
_cell_formula_units_Z            9
_cell_measurement_reflns_used    3153
_cell_measurement_temperature    110.05(10)
_cell_measurement_theta_max      31.9520
_cell_measurement_theta_min      3.5440
_shelx_estimated_absorpt_T_max   ?
_shelx_estimated_absorpt_T_min   ?
_exptl_absorpt_coefficient_mu    0.086
_exptl_absorpt_correction_T_max  0.990
_exptl_absorpt_correction_T_min  0.985
_exptl_absorpt_correction_type   analytical
_exptl_absorpt_process_details   
;
CrysAlisPro, Agilent Technologies,
Version 1.171.37.31 (release 14-01-2014 CrysAlis171 .NET)
(compiled Jan 14 2014,18:38:05)
Analytical numeric absorption correction using a multifaceted crystal
			model based on expressions derived by R.C. Clark & J.S. Reid.
(Clark, R. C. & Reid, J. S. (1995). Acta Cryst. A51, 887-897)
Empirical absorption correction using spherical harmonics,
 implemented in SCALE3 ABSPACK scaling algorithm.
;

_exptl_crystal_colour            'clear colourless'
_exptl_crystal_colour_lustre     clear
_exptl_crystal_colour_modifier   .
_exptl_crystal_colour_primary    colourless
_exptl_crystal_density_diffrn    1.261
_exptl_crystal_density_meas      ?
_exptl_crystal_density_method    ?
_exptl_crystal_description       block
_exptl_crystal_F_000             1602
_exptl_crystal_size_max          0.2757
_exptl_crystal_size_mid          0.1814
_exptl_crystal_size_min          0.1572
_exptl_transmission_factor_max   ?
_exptl_transmission_factor_min   ?
_diffrn_reflns_av_R_equivalents  0.0191
_diffrn_reflns_av_unetI/netI     0.0367
_diffrn_reflns_Laue_measured_fraction_full 0.999
_diffrn_reflns_Laue_measured_fraction_max 0.900
_diffrn_reflns_limit_h_max       31
_diffrn_reflns_limit_h_min       -23
_diffrn_reflns_limit_k_max       25
_diffrn_reflns_limit_k_min       -26
_diffrn_reflns_limit_l_max       13
_diffrn_reflns_limit_l_min       -15
_diffrn_reflns_number            6369
_diffrn_reflns_point_group_measured_fraction_full 0.876
_diffrn_reflns_point_group_measured_fraction_max 0.683
_diffrn_reflns_theta_full        25.242
_diffrn_reflns_theta_max         32.005
_diffrn_reflns_theta_min         2.983
_diffrn_ambient_environment      N~2~
_diffrn_ambient_temperature      110.05(10)
_diffrn_detector                 'CCD plate'
_diffrn_detector_area_resol_mean 16.1450
_diffrn_detector_type            Eos
_diffrn_measured_fraction_theta_full 0.999
_diffrn_measured_fraction_theta_max 0.900
_diffrn_measurement_details      
;
#__ type_ start__ end____ width___ exp.time_
  1 omega  -93.00  -15.00   1.0000   20.0000
omega____ theta____ kappa____ phi______ frames
    -      -25.0740    0.0000  150.0000 78

#__ type_ start__ end____ width___ exp.time_
  2 omega    5.00   59.00   1.0000   20.0000
omega____ theta____ kappa____ phi______ frames
    -       26.4802  -99.0000   60.0000 54

#__ type_ start__ end____ width___ exp.time_
  3 omega   35.00   69.00   1.0000   20.0000
omega____ theta____ kappa____ phi______ frames
    -       19.0201   77.0000  -60.0000 34

#__ type_ start__ end____ width___ exp.time_
  4 omega   37.00   75.00   1.0000   20.0000
omega____ theta____ kappa____ phi______ frames
    -       19.0201   77.0000   60.0000 38
;
_diffrn_measurement_device       'four-circle diffractometer'
_diffrn_measurement_device_type  'SuperNova, Single source at offset, Eos'
_diffrn_measurement_method       '\w scans'
_diffrn_orient_matrix_UB_11      0.0356613000
_diffrn_orient_matrix_UB_12      0.0297314000
_diffrn_orient_matrix_UB_13      0.0084190000
_diffrn_orient_matrix_UB_21      0.0125828000
_diffrn_orient_matrix_UB_22      -0.0134942000
_diffrn_orient_matrix_UB_23      -0.0513138000
_diffrn_orient_matrix_UB_31      -0.0073394000
_diffrn_orient_matrix_UB_32      0.0204228000
_diffrn_orient_matrix_UB_33      -0.0463462000
_diffrn_radiation_monochromator  mirror
_diffrn_radiation_probe          x-ray
_diffrn_radiation_type           MoK\a
_diffrn_radiation_wavelength     0.71073
_diffrn_source                   'SuperNova (Mo) X-ray Source'
_reflns_Friedel_coverage         0.518
_reflns_Friedel_fraction_full    0.752
_reflns_Friedel_fraction_max     0.466
_reflns_number_gt                3948
_reflns_number_total             4199
_reflns_special_details          
;
 Reflections were merged by SHELXL according to the crystal
 class for the calculation of statistics and refinement.
 
 _reflns_Friedel_fraction is defined as the number of unique
 Friedel pairs measured divided by the number that would be
 possible theoretically, ignoring centric projections and
 systematic absences.
;
_reflns_threshold_expression     'I > 2\s(I)'
_computing_cell_refinement       
;
CrysAlisPro, Agilent Technologies,
Version 1.171.37.31 (release 14-01-2014 CrysAlis171 .NET)
(compiled Jan 14 2014,18:38:05)
;
_computing_data_collection       
;
CrysAlisPro, Agilent Technologies,
Version 1.171.37.31 (release 14-01-2014 CrysAlis171 .NET)
(compiled Jan 14 2014,18:38:05)
;
_computing_data_reduction        
;
CrysAlisPro, Agilent Technologies,
Version 1.171.37.31 (release 14-01-2014 CrysAlis171 .NET)
(compiled Jan 14 2014,18:38:05)
;
_computing_molecular_graphics    'Olex2 (Dolomanov et al., 2009)'
_computing_publication_material  'Olex2 (Dolomanov et al., 2009)'
_computing_structure_refinement  'ShelXL (Sheldrick, 2015)'
_computing_structure_solution    'ShelXS (Sheldrick, 2008)'
_refine_diff_density_max         0.265
_refine_diff_density_min         -0.227
_refine_diff_density_rms         0.045
_refine_ls_abs_structure_details 
;
 Flack x determined using 1307 quotients [(I+)-(I-)]/[(I+)+(I-)]
 (Parsons, Flack and Wagner, Acta Cryst. B69 (2013) 249-259).
;
_refine_ls_abs_structure_Flack   -0.5(5)
_refine_ls_extinction_coef       .
_refine_ls_extinction_method     none
_refine_ls_goodness_of_fit_ref   1.048
_refine_ls_hydrogen_treatment    mixed
_refine_ls_matrix_type           full
_refine_ls_number_parameters     236
_refine_ls_number_reflns         4199
_refine_ls_number_restraints     1
_refine_ls_R_factor_all          0.0404
_refine_ls_R_factor_gt           0.0363
_refine_ls_restrained_S_all      1.048
_refine_ls_shift/su_max          0.000
_refine_ls_shift/su_mean         0.000
_refine_ls_structure_factor_coef Fsqd
_refine_ls_weighting_details     
'w=1/[\s^2^(Fo^2^)+(0.0398P)^2^+2.4699P] where P=(Fo^2^+2Fc^2^)/3'
_refine_ls_weighting_scheme      calc
_refine_ls_wR_factor_gt          0.0863
_refine_ls_wR_factor_ref         0.0900
_refine_special_details          ?
_olex2_refinement_description    
;
1. Fixed Uiso
 At 1.2 times of:
  All C(H) groups, All C(H,H) groups
 At 1.5 times of:
  All C(H,H,H) groups
2.a Ternary CH refined with riding coordinates:
 C2(H2)
2.b Secondary CH2 refined with riding coordinates:
 C3(H3A,H3B)
2.c Aromatic/amide H refined with riding coordinates:
 C6(H6), C7(H7), C8(H8), C9(H9), C13(H13), C14(H14), C15(H15), C16(H16),
 C17(H17)
2.d Idealised Me refined as rotating group:
 C18(H18A,H18B,H18C), C20(H20A,H20B,H20C)
;
_atom_sites_solution_hydrogens   mixed
_atom_sites_solution_primary     direct
_atom_sites_solution_secondary   ?
loop_
_atom_site_label
_atom_site_type_symbol
_atom_site_fract_x
_atom_site_fract_y
_atom_site_fract_z
_atom_site_U_iso_or_equiv
_atom_site_adp_type
_atom_site_occupancy
_atom_site_site_symmetry_order
_atom_site_calc_flag
_atom_site_refinement_flags_posn
_atom_site_refinement_flags_adp
_atom_site_refinement_flags_occupancy
_atom_site_disorder_assembly
_atom_site_disorder_group
C1 C -0.46413(10) -0.33895(10) -0.38047(18) 0.0151(3) Uani 1 1 d . . . . .
C2 C -0.46077(10) -0.35793(10) -0.52389(18) 0.0138(3) Uani 1 1 d . . . . .
H2 H -0.4888 -0.3426 -0.5779 0.017 Uiso 1 1 calc R . . . .
C3 C -0.49312(10) -0.44061(10) -0.53732(19) 0.0161(4) Uani 1 1 d . . . . .
H3A H -0.4963 -0.4527 -0.6298 0.019 Uiso 1 1 calc R . . . .
H3B H -0.4603 -0.4541 -0.4963 0.019 Uiso 1 1 calc R . . . .
C4 C -0.56697(10) -0.48463(10) -0.47684(19) 0.0148(3) Uani 1 1 d . . . . .
C5 C -0.57970(11) -0.51575(10) -0.34686(19) 0.0159(4) Uani 1 1 d . . . . .
C6 C -0.53441(11) -0.51854(11) -0.2492(2) 0.0195(4) Uani 1 1 d . . . . .
H6 H -0.4843 -0.4941 -0.2602 0.023 Uiso 1 1 calc R . . . .
C7 C -0.56570(12) -0.55826(12) -0.1365(2) 0.0222(4) Uani 1 1 d . . . . .
H7 H -0.5361 -0.5606 -0.0717 0.027 Uiso 1 1 calc R . . . .
C8 C -0.64138(12) -0.59514(11) -0.1180(2) 0.0215(4) Uani 1 1 d . . . . .
H8 H -0.6610 -0.6220 -0.0417 0.026 Uiso 1 1 calc R . . . .
C9 C -0.68718(11) -0.59219(11) -0.2117(2) 0.0206(4) Uani 1 1 d . . . . .
H9 H -0.7372 -0.6159 -0.1988 0.025 Uiso 1 1 calc R . . . .
C10 C -0.65568(10) -0.55241(10) -0.32606(19) 0.0164(4) Uani 1 1 d . . . . .
C11 C -0.63375(10) -0.50234(10) -0.52774(19) 0.0157(3) Uani 1 1 d . . . . .
C12 C -0.65506(10) -0.48442(10) -0.65407(18) 0.0158(4) Uani 1 1 d . . . . .
C13 C -0.70585(11) -0.46054(11) -0.6538(2) 0.0202(4) Uani 1 1 d . . . . .
H13 H -0.7238 -0.4545 -0.5744 0.024 Uiso 1 1 calc R . . . .
C14 C -0.72953(12) -0.44580(12) -0.7709(2) 0.0241(4) Uani 1 1 d . . . . .
H14 H -0.7636 -0.4305 -0.7699 0.029 Uiso 1 1 calc R . . . .
C15 C -0.70206(12) -0.45405(12) -0.8898(2) 0.0249(4) Uani 1 1 d . . . . .
H15 H -0.7179 -0.4444 -0.9684 0.030 Uiso 1 1 calc R . . . .
C16 C -0.65124(12) -0.47662(11) -0.8913(2) 0.0234(4) Uani 1 1 d . . . . .
H16 H -0.6326 -0.4814 -0.9709 0.028 Uiso 1 1 calc R . . . .
C17 C -0.62780(12) -0.49228(11) -0.7740(2) 0.0199(4) Uani 1 1 d . . . . .
H17 H -0.5940 -0.5079 -0.7757 0.024 Uiso 1 1 calc R . . . .
C18 C -0.53198(15) -0.31477(16) -0.2262(2) 0.0342(6) Uani 1 1 d . . . . .
H18A H -0.5471 -0.3580 -0.1751 0.051 Uiso 1 1 calc GR . . . .
H18B H -0.5691 -0.3016 -0.2235 0.051 Uiso 1 1 calc GR . . . .
H18C H -0.4877 -0.2759 -0.1906 0.051 Uiso 1 1 calc GR . . . .
C19 C -0.34349(10) -0.24901(10) -0.55986(18) 0.0159(4) Uani 1 1 d . . . . .
C20 C -0.26686(11) -0.21826(11) -0.6100(2) 0.0234(4) Uani 1 1 d . . . . .
H20A H -0.2333 -0.1950 -0.5391 0.035 Uiso 1 1 calc GR . . . .
H20B H -0.2579 -0.1834 -0.6779 0.035 Uiso 1 1 calc GR . . . .
H20C H -0.2607 -0.2568 -0.6448 0.035 Uiso 1 1 calc GR . . . .
N1 N -0.38618(9) -0.32192(9) -0.56954(17) 0.0166(3) Uani 1 1 d . . . . .
H1 H -0.3666(14) -0.3481(14) -0.594(3) 0.023(7) Uiso 1 1 d . . . . .
N2 N -0.68736(9) -0.54196(9) -0.43566(17) 0.0178(3) Uani 1 1 d . . . . .
H2A H -0.7317(16) -0.5641(15) -0.454(3) 0.025(7) Uiso 1 1 d . . . . .
O1 O -0.52005(8) -0.32810(8) -0.36099(14) 0.0209(3) Uani 1 1 d . . . . .
O2 O -0.42368(7) -0.33635(8) -0.29487(14) 0.0196(3) Uani 1 1 d . . . . .
O3 O -0.36631(8) -0.21082(7) -0.51249(14) 0.0192(3) Uani 1 1 d . . . . .

loop_
_atom_site_aniso_label
_atom_site_aniso_U_11
_atom_site_aniso_U_22
_atom_site_aniso_U_33
_atom_site_aniso_U_23
_atom_site_aniso_U_13
_atom_site_aniso_U_12
C1 0.0124(8) 0.0121(8) 0.0185(8) 0.0011(7) 0.0026(7) 0.0044(7)
C2 0.0117(8) 0.0124(8) 0.0168(8) 0.0000(6) 0.0010(6) 0.0055(7)
C3 0.0131(8) 0.0130(8) 0.0205(8) -0.0015(7) 0.0018(7) 0.0053(7)
C4 0.0128(8) 0.0121(8) 0.0185(8) -0.0003(7) 0.0010(7) 0.0055(7)
C5 0.0152(9) 0.0131(8) 0.0188(8) -0.0015(7) -0.0002(7) 0.0066(7)
C6 0.0176(9) 0.0161(9) 0.0242(10) -0.0016(8) -0.0014(8) 0.0080(8)
C7 0.0275(11) 0.0182(9) 0.0221(9) -0.0020(8) -0.0055(8) 0.0123(8)
C8 0.0275(11) 0.0158(9) 0.0187(9) 0.0017(7) 0.0016(8) 0.0089(8)
C9 0.0190(9) 0.0173(9) 0.0229(9) 0.0014(7) 0.0040(8) 0.0072(8)
C10 0.0143(9) 0.0136(8) 0.0198(8) -0.0003(7) 0.0003(7) 0.0060(7)
C11 0.0139(8) 0.0117(8) 0.0188(8) -0.0008(7) 0.0019(7) 0.0045(7)
C12 0.0122(8) 0.0118(8) 0.0195(9) 0.0006(7) -0.0003(7) 0.0031(7)
C13 0.0178(9) 0.0205(10) 0.0217(9) 0.0014(8) 0.0020(7) 0.0092(8)
C14 0.0199(10) 0.0259(11) 0.0278(10) 0.0016(9) -0.0029(8) 0.0125(9)
C15 0.0256(11) 0.0252(11) 0.0209(10) -0.0001(8) -0.0065(8) 0.0105(9)
C16 0.0265(11) 0.0209(10) 0.0187(9) -0.0048(8) 0.0001(8) 0.0088(9)
C17 0.0193(9) 0.0168(9) 0.0231(9) -0.0030(7) 0.0000(8) 0.0086(8)
C18 0.0396(14) 0.0505(16) 0.0224(11) -0.0052(10) 0.0057(10) 0.0299(13)
C19 0.0159(9) 0.0159(9) 0.0145(8) 0.0018(7) 0.0018(7) 0.0070(7)
C20 0.0160(9) 0.0178(9) 0.0313(11) 0.0003(8) 0.0068(8) 0.0047(8)
N1 0.0138(7) 0.0140(8) 0.0228(8) 0.0009(6) 0.0056(6) 0.0074(6)
N2 0.0116(8) 0.0179(8) 0.0208(8) 0.0024(6) 0.0008(6) 0.0048(7)
O1 0.0204(7) 0.0282(8) 0.0199(7) -0.0010(6) 0.0027(5) 0.0165(6)
O2 0.0161(7) 0.0203(7) 0.0205(7) -0.0007(6) -0.0024(6) 0.0077(6)
O3 0.0198(7) 0.0157(7) 0.0234(7) 0.0001(6) 0.0027(6) 0.0098(6)

_geom_special_details            
;
 All esds (except the esd in the dihedral angle between two l.s. planes)
 are estimated using the full covariance matrix.  The cell esds are taken
 into account individually in the estimation of esds in distances, angles
 and torsion angles; correlations between esds in cell parameters are only
 used when they are defined by crystal symmetry.  An approximate (isotropic)
 treatment of cell esds is used for estimating esds involving l.s. planes.
;
loop_
_geom_bond_atom_site_label_1
_geom_bond_atom_site_label_2
_geom_bond_distance
_geom_bond_site_symmetry_2
_geom_bond_publ_flag
C1 C2 1.526(3) . ?
C1 O1 1.334(2) . ?
C1 O2 1.206(2) . ?
C2 H2 0.9800 . ?
C2 C3 1.540(3) . ?
C2 N1 1.450(2) . ?
C3 H3A 0.9700 . ?
C3 H3B 0.9700 . ?
C3 C4 1.500(3) . ?
C4 C5 1.443(3) . ?
C4 C11 1.375(3) . ?
C5 C6 1.406(3) . ?
C5 C10 1.415(3) . ?
C6 H6 0.9300 . ?
C6 C7 1.382(3) . ?
C7 H7 0.9300 . ?
C7 C8 1.406(3) . ?
C8 H8 0.9300 . ?
C8 C9 1.387(3) . ?
C9 H9 0.9300 . ?
C9 C10 1.398(3) . ?
C10 N2 1.378(3) . ?
C11 C12 1.475(3) . ?
C11 N2 1.388(2) . ?
C12 C13 1.404(3) . ?
C12 C17 1.397(3) . ?
C13 H13 0.9300 . ?
C13 C14 1.390(3) . ?
C14 H14 0.9300 . ?
C14 C15 1.392(3) . ?
C15 H15 0.9300 . ?
C15 C16 1.384(3) . ?
C16 H16 0.9300 . ?
C16 C17 1.397(3) . ?
C17 H17 0.9300 . ?
C18 H18A 0.9600 . ?
C18 H18B 0.9600 . ?
C18 H18C 0.9600 . ?
C18 O1 1.449(3) . ?
C19 C20 1.509(3) . ?
C19 N1 1.353(2) . ?
C19 O3 1.233(2) . ?
C20 H20A 0.9600 . ?
C20 H20B 0.9600 . ?
C20 H20C 0.9600 . ?
N1 H1 0.88(3) . ?
N2 H2A 0.84(3) . ?

loop_
_geom_angle_atom_site_label_1
_geom_angle_atom_site_label_2
_geom_angle_atom_site_label_3
_geom_angle
_geom_angle_site_symmetry_1
_geom_angle_site_symmetry_3
_geom_angle_publ_flag
O1 C1 C2 110.58(16) . . ?
O2 C1 C2 125.24(17) . . ?
O2 C1 O1 124.13(17) . . ?
C1 C2 H2 109.4 . . ?
C1 C2 C3 109.48(15) . . ?
C3 C2 H2 109.4 . . ?
N1 C2 C1 110.52(15) . . ?
N1 C2 H2 109.4 . . ?
N1 C2 C3 108.70(15) . . ?
C2 C3 H3A 108.8 . . ?
C2 C3 H3B 108.8 . . ?
H3A C3 H3B 107.7 . . ?
C4 C3 C2 113.98(15) . . ?
C4 C3 H3A 108.8 . . ?
C4 C3 H3B 108.8 . . ?
C5 C4 C3 124.07(17) . . ?
C11 C4 C3 129.14(18) . . ?
C11 C4 C5 106.78(17) . . ?
C6 C5 C4 133.83(19) . . ?
C6 C5 C10 119.22(18) . . ?
C10 C5 C4 106.88(17) . . ?
C5 C6 H6 120.6 . . ?
C7 C6 C5 118.83(19) . . ?
C7 C6 H6 120.6 . . ?
C6 C7 H7 119.4 . . ?
C6 C7 C8 121.3(2) . . ?
C8 C7 H7 119.4 . . ?
C7 C8 H8 119.5 . . ?
C9 C8 C7 121.07(19) . . ?
C9 C8 H8 119.5 . . ?
C8 C9 H9 121.1 . . ?
C8 C9 C10 117.75(19) . . ?
C10 C9 H9 121.1 . . ?
C9 C10 C5 121.84(18) . . ?
N2 C10 C5 107.78(16) . . ?
N2 C10 C9 130.36(18) . . ?
C4 C11 C12 131.75(18) . . ?
C4 C11 N2 109.48(17) . . ?
N2 C11 C12 118.72(17) . . ?
C13 C12 C11 118.84(17) . . ?
C17 C12 C11 122.13(18) . . ?
C17 C12 C13 119.01(18) . . ?
C12 C13 H13 119.6 . . ?
C14 C13 C12 120.7(2) . . ?
C14 C13 H13 119.6 . . ?
C13 C14 H14 120.2 . . ?
C13 C14 C15 119.7(2) . . ?
C15 C14 H14 120.2 . . ?
C14 C15 H15 119.9 . . ?
C16 C15 C14 120.2(2) . . ?
C16 C15 H15 119.9 . . ?
C15 C16 H16 119.8 . . ?
C15 C16 C17 120.4(2) . . ?
C17 C16 H16 119.8 . . ?
C12 C17 C16 120.00(19) . . ?
C12 C17 H17 120.0 . . ?
C16 C17 H17 120.0 . . ?
H18A C18 H18B 109.5 . . ?
H18A C18 H18C 109.5 . . ?
H18B C18 H18C 109.5 . . ?
O1 C18 H18A 109.5 . . ?
O1 C18 H18B 109.5 . . ?
O1 C18 H18C 109.5 . . ?
N1 C19 C20 115.62(17) . . ?
O3 C19 C20 122.82(18) . . ?
O3 C19 N1 121.57(18) . . ?
C19 C20 H20A 109.5 . . ?
C19 C20 H20B 109.5 . . ?
C19 C20 H20C 109.5 . . ?
H20A C20 H20B 109.5 . . ?
H20A C20 H20C 109.5 . . ?
H20B C20 H20C 109.5 . . ?
C2 N1 H1 119.6(17) . . ?
C19 N1 C2 120.78(16) . . ?
C19 N1 H1 119.1(17) . . ?
C10 N2 C11 109.01(16) . . ?
C10 N2 H2A 126.4(19) . . ?
C11 N2 H2A 122.9(19) . . ?
C1 O1 C18 115.64(17) . . ?

loop_
_geom_hbond_atom_site_label_D
_geom_hbond_atom_site_label_H
_geom_hbond_atom_site_label_A
_geom_hbond_distance_DH
_geom_hbond_distance_HA
_geom_hbond_distance_DA
_geom_hbond_angle_DHA
_geom_hbond_site_symmetry_A
N1 H1 O2 0.88(3) 2.07(3) 2.944(2) 171(2) 8_444
N2 H2A O3 0.84(3) 2.18(3) 3.010(2) 172(3) 3_445

loop_
_geom_torsion_atom_site_label_1
_geom_torsion_atom_site_label_2
_geom_torsion_atom_site_label_3
_geom_torsion_atom_site_label_4
_geom_torsion
_geom_torsion_site_symmetry_1
_geom_torsion_site_symmetry_2
_geom_torsion_site_symmetry_3
_geom_torsion_site_symmetry_4
_geom_torsion_publ_flag
C1 C2 C3 C4 51.5(2) . . . . ?
C1 C2 N1 C19 -55.2(2) . . . . ?
C2 C1 O1 C18 175.74(18) . . . . ?
C2 C3 C4 C5 -96.7(2) . . . . ?
C2 C3 C4 C11 81.9(2) . . . . ?
C3 C2 N1 C19 -175.40(17) . . . . ?
C3 C4 C5 C6 -3.6(3) . . . . ?
C3 C4 C5 C10 179.60(17) . . . . ?
C3 C4 C11 C12 -0.5(3) . . . . ?
C3 C4 C11 N2 -177.94(18) . . . . ?
C4 C5 C6 C7 -175.3(2) . . . . ?
C4 C5 C10 C9 176.50(18) . . . . ?
C4 C5 C10 N2 -2.1(2) . . . . ?
C4 C11 C12 C13 -134.0(2) . . . . ?
C4 C11 C12 C17 47.7(3) . . . . ?
C4 C11 N2 C10 -2.2(2) . . . . ?
C5 C4 C11 C12 178.27(19) . . . . ?
C5 C4 C11 N2 0.8(2) . . . . ?
C5 C6 C7 C8 -0.4(3) . . . . ?
C5 C10 N2 C11 2.6(2) . . . . ?
C6 C5 C10 C9 -0.8(3) . . . . ?
C6 C5 C10 N2 -179.38(17) . . . . ?
C6 C7 C8 C9 -0.8(3) . . . . ?
C7 C8 C9 C10 1.1(3) . . . . ?
C8 C9 C10 C5 -0.3(3) . . . . ?
C8 C9 C10 N2 177.9(2) . . . . ?
C9 C10 N2 C11 -175.8(2) . . . . ?
C10 C5 C6 C7 1.2(3) . . . . ?
C11 C4 C5 C6 177.5(2) . . . . ?
C11 C4 C5 C10 0.7(2) . . . . ?
C11 C12 C13 C14 -177.49(18) . . . . ?
C11 C12 C17 C16 178.12(18) . . . . ?
C12 C11 N2 C10 -179.99(17) . . . . ?
C12 C13 C14 C15 -0.7(3) . . . . ?
C13 C12 C17 C16 -0.2(3) . . . . ?
C13 C14 C15 C16 -0.2(3) . . . . ?
C14 C15 C16 C17 0.9(3) . . . . ?
C15 C16 C17 C12 -0.7(3) . . . . ?
C17 C12 C13 C14 0.8(3) . . . . ?
C20 C19 N1 C2 179.59(17) . . . . ?
N1 C2 C3 C4 172.32(16) . . . . ?
N2 C11 C12 C13 43.2(3) . . . . ?
N2 C11 C12 C17 -135.1(2) . . . . ?
O1 C1 C2 C3 -100.79(18) . . . . ?
O1 C1 C2 N1 139.51(16) . . . . ?
O2 C1 C2 C3 76.9(2) . . . . ?
O2 C1 C2 N1 -42.8(2) . . . . ?
O2 C1 O1 C18 -2.0(3) . . . . ?
O3 C19 N1 C2 -0.1(3) . . . . ?

loop_
_refln_index_h
_refln_index_k
_refln_index_l
_refln_F_squared_meas
_refln_F_squared_sigma
_refln_scale_group_code
0 0 -12 17558 1238.34 2
0 0 -9 169104 4081.44 2
0 0 -6 40589.7 1360.52 2
0 0 -3 706976 11818.2 2
0 0 6 37988 1221.46 4
0 0 9 163469 3766.6 4
0 0 12 17566 1120.82 4
1 -1 -13 7438.62 835.905 2
0 1 -13 6630.45 821.409 2
0 1 -10 4191.95 554.423 2
-1 0 -10 3693.45 519.728 2
1 -1 -10 3496.18 481.249 2
1 -1 -7 89200.8 2356.33 2
-1 0 -7 87407.7 2348.51 2
0 1 -7 85800.5 2389.9 2
-1 0 -4 996.296 177.607 2
0 1 -4 1071.84 191.095 2
1 -1 -4 835.818 147.673 2
1 -1 2 159442 2954.81 2
0 1 2 163851 2881.97 2
0 1 2 163120 2854.51 4
0 1 5 42805.6 1195.39 4
0 1 5 42288.7 1121.35 3
-1 0 5 44250.6 1028.97 3
-1 0 5 39502.1 1199.42 4
0 1 8 49477 1603.46 4
1 -1 8 49336.8 1597.39 4
-1 0 8 53085.4 1364.29 3
-1 0 8 51959.5 1669.98 4
1 -1 11 211.155 178.987 4
0 1 11 325.784 192.412 4
-1 0 11 538.194 234.464 4
1 0 -14 2485.89 548.675 2
-1 1 -11 623.263 248.42 2
0 -1 -11 619.126 327.088 2
1 0 -11 88.3565 214.631 2
1 0 -8 51698.1 1795.83 2
0 -1 -8 48434.5 1700.07 2
-1 1 -8 51510.5 1796.58 2
1 0 -5 44210.2 1320.42 2
0 -1 -5 42977.6 1301.77 2
-1 1 -5 44167.7 1356.73 2
0 -1 -2 160825 2854.7 2
0 -1 -2 160155 2824.58 4
-1 1 -2 162545 2934.95 2
1 0 -2 157300 2875.14 2
-1 1 4 873.201 112.916 3
1 0 4 779.248 130.583 4
-1 1 4 801.061 148.491 4
0 -1 7 84591.3 2181.47 4
-1 1 7 86901 1951.59 3
1 0 7 86589.9 2142.92 4
-1 1 7 83849 2181.36 4
1 0 10 4810.96 515.903 4
0 -1 10 4219.5 492.551 4
-1 1 10 3620.37 457.277 4
0 -1 13 8047.88 795.058 4
-1 1 13 7139.79 746.262 4
1 0 13 7432.56 748.805 4
1 1 -15 5566.61 818.676 2
1 1 -12 3284.94 582.668 2
-2 1 -12 2430.51 496.821 2
1 -2 -12 3259.57 532.534 2
-2 1 -9 37596.9 1584.69 2
1 1 -9 42299.8 1693.8 2
1 -2 -9 35964 1503.96 2
1 -2 -6 24901 986.091 2
1 1 -6 24628.2 1035.95 2
-2 1 -6 25179.9 1050.39 2
1 -2 -3 525457 8603.45 4
-2 1 -3 511840 8712.53 2
1 -2 -3 510090 8570 2
-2 1 3 102600 1871.8 3
1 1 3 105060 1992.44 4
-2 1 3 103733 2105.99 4
-2 1 6 31634.4 877.06 3
1 1 6 30930.5 1031.5 4
-2 1 6 30392 1092.49 4
1 -2 9 21468.5 1046.69 4
-2 1 9 21496 1072.32 4
1 1 9 20409.1 994.849 4
-2 1 12 238.551 205.302 4
1 -2 12 -161.738 198.036 4
1 1 12 -188.625 170.299 4
2 -3 -13 7585.77 818.728 2
1 2 -13 7720.49 901.343 2
1 2 -10 15681.1 1076.81 2
-3 1 -10 14434.2 1012.86 2
2 -3 -10 16321.4 1021.22 2
1 2 -7 39111.5 1491.19 2
-3 1 -7 40718 1481.61 2
2 -3 -7 41191.7 1400.57 2
2 -3 -4 59824.7 1435.32 4
1 2 -4 54953.2 1487.89 2
2 -3 -4 56559.2 1364.04 2
-3 1 -4 58243.2 1509.35 2
1 2 -1 581467 9576.89 1
-3 1 -1 587063 9560.72 1
1 2 2 59437.1 1345.82 3
-3 1 2 64766 1345.43 4
-3 1 5 18077.3 527.452 3
1 2 5 19818.5 746.652 3
-3 1 5 16525.3 741.435 4
1 2 5 18441.6 694.275 4
-3 1 8 2785.91 233.387 3
1 2 8 2795.19 351.1 4
-3 1 8 2275.43 337.235 4
1 2 11 11281 818.152 4
-3 1 11 12443.6 927.868 4
2 -3 11 14051.8 931.74 4
0 2 -14 7300.24 909.375 2
2 -2 -14 6361.95 803.448 2
0 2 -11 859.845 340.72 2
-2 0 -11 52.4798 221.657 2
2 -2 -11 808.39 271.254 2
2 -2 -8 6543.33 562.157 2
0 2 -8 6600.63 627.448 2
-2 0 -8 6903.63 610.741 2
-2 0 -5 100476 2335.61 2
2 -2 -5 99859.4 2258.81 2
0 2 -5 100034 2386.77 2
2 -2 -2 179722 3106.76 3
0 2 -2 180083 3269.2 2
2 -2 -2 180291 3220.96 4
2 -2 -2 179586 3129.05 2
2 -2 1 146780 2651.19 2
0 2 1 151359 2639.81 3
-2 0 4 98368 1813.2 3
0 2 4 101037 2077.97 4
0 2 4 100581 2077.46 3
-2 0 7 7755.83 376.655 3
0 2 7 7125.28 511.01 4
-2 0 7 6863.05 526.31 4
2 -2 7 7361.63 506.553 4
2 -2 10 30566.6 1334.49 4
-2 0 10 30568.8 1398.31 4
0 2 10 33816.2 1407.36 4
0 2 13 2322.92 433.007 4
-2 0 13 2437.71 466.841 4
2 -2 13 2158.75 412.459 4
2 -1 -12 -3.57979 234.234 2
-1 2 -12 -136.131 277.055 2
2 -1 -9 23140.7 1192.22 2
-1 -1 -9 19882.6 1086.94 2
-1 2 -9 20670.5 1168.71 2
-1 -1 -6 32331.3 1167.06 2
2 -1 -6 32218.6 1158.19 2
-1 2 -6 31817.9 1234.26 2
-1 2 -3 101843 2149.26 2
2 -1 -3 100654 2041 2
-1 -1 -3 102175 2063.95 2
-1 2 3 505870 8602.74 3
-1 2 3 510088 8674.73 4
-1 2 3 527551 8624.15 2
-1 2 6 24200.7 934.114 4
2 -1 6 24432.6 888.646 4
-1 2 6 25959.2 850.329 3
-1 -1 6 25388.2 728.27 3
-1 2 9 37277 1438.24 4
-1 -1 9 38350.3 1483.45 4
2 -1 9 39629.6 1424.53 4
-1 2 12 2559.81 443.357 4
-1 -1 12 2479.69 455.072 4
2 -1 12 2773.36 443.779 4
-2 2 -13 2084.82 510.964 2
2 0 -13 2192.7 499.772 2
-2 2 -10 31870.9 1544.67 2
2 0 -10 33580.9 1579.82 2
0 -2 -10 32132.4 1474.45 2
-2 2 -7 7018.17 594.117 2
0 -2 -7 7621.19 557.448 2
2 0 -7 6707.9 557.463 2
-2 2 -4 102776 2289.72 2
2 0 -4 98928.7 2186.09 2
0 -2 -4 99127.4 2119.2 2
0 -2 -1 155504 2727.93 3
-2 2 -1 155037 2743.65 2
-2 2 2 177475 3192.84 4
2 0 2 184973 3244.75 2
2 0 2 176303 3042.51 4
2 0 5 97501.8 2128.87 4
-2 2 5 99961.4 2041.12 3
-2 2 5 102687 2270.98 4
-2 2 8 5815.52 518.285 4
2 0 8 5801.11 477.24 4
0 -2 8 7111.69 406.846 3
0 -2 8 6316.47 530.864 4
-2 2 11 934.406 292.04 4
2 0 11 610.887 205.557 4
0 -2 11 741.729 272.056 4
2 1 -14 2938.18 580.944 2
-3 2 -11 11359.4 957.86 2
2 1 -11 11494.8 985.317 2
1 -3 -11 10196.5 838.962 2
2 1 -8 1496.61 315.154 2
-3 2 -8 1533.08 327.027 2
1 -3 -8 1627.13 280.693 2
1 -3 -5 139270 2855.98 2
2 1 -5 134171 2971.09 2
-3 2 -5 136565 3030.94 2
1 -3 -2 324938 5468.67 3
1 -3 -2 325200 5445.85 4
-3 2 -2 322358 5287.72 1
1 -3 -2 306262 5301.85 2
-3 2 -2 323615 5562.81 2
2 1 1 270688 4670.38 1
-3 2 1 279398 4646.53 4
1 -3 1 271862 4675.14 2
2 1 4 97493.3 1978.29 4
-3 2 4 98599.2 2153.93 4
-3 2 7 9420.07 629.263 4
2 1 7 8725 547.613 4
-3 2 7 11218.9 489.113 3
1 -3 10 10801 790.445 4
2 1 10 11760.8 779.399 4
-3 2 10 10662.7 811.763 4
-3 2 13 2694.65 475.808 4
2 1 13 3420.64 499.669 4
1 -3 13 2698.17 465.54 4
2 2 -12 3688.86 614.443 2
2 -4 -12 3406.47 522.993 2
2 -4 -9 70399.1 2170.1 2
-4 2 -9 72004.2 2350.36 2
2 2 -9 69197.5 2350.79 2
-4 2 -6 11163.1 696.979 2
2 2 -6 10846.8 681.172 2
2 -4 -6 11148.9 598.137 2
2 -4 -3 227284 4035.11 2
2 -4 -3 227072 4167.44 3
-4 2 -3 237846 4034.96 1
2 -4 -3 234226 4208.57 4
2 -4 0 271302 4515.56 2
2 2 0 273264 4643.11 3
2 2 0 273248 4688.63 1
-4 2 3 41340.5 1100.31 4
2 2 3 42054 952.897 4
2 2 6 46534.2 1308.8 4
-4 2 6 47690.5 1476.29 4
2 -4 9 55827.6 1868.4 4
-4 2 9 61599.9 2006.22 4
2 2 9 58094.5 1799.58 4
2 -4 12 21053 1242.22 4
2 2 12 20947.4 1173.82 4
-4 2 12 21731.5 1305.38 4
2 3 -13 9450.44 1008.85 2
3 -5 -10 16814.9 989.504 2
2 3 -10 15714.4 1116.27 2
2 3 -7 56248.4 1883.11 2
3 -5 -7 57765.6 1666.06 2
3 -5 -4 190021 3490.05 2
2 3 -4 187155 3562.41 1
2 3 -4 193469 3831.98 2
3 -5 -4 191444 3614.2 3
-5 2 -1 723103 11721 1
2 3 -1 707880 11675.4 3
2 3 -1 699795 11790.7 1
-5 2 2 208813 3805.09 4
2 3 2 211057 3887.08 3
-5 2 5 50774.3 1475.07 4
2 3 5 49276.8 1281.75 4
-5 2 8 119316 3034.72 4
2 3 8 122047 2834.65 4
-5 2 11 15.9234 182.116 4
2 3 11 -181.478 170.868 4
3 -5 11 2.65694 145.088 4
1 3 -14 2289.46 567.624 2
1 3 -11 1053.03 371.375 2
3 -4 -11 906.221 285.255 2
1 3 -8 13769.6 918.008 2
3 -4 -8 14483.1 828.222 2
1 3 -5 18738 857.641 2
3 -4 -5 19682.7 739.13 2
3 -4 -2 203838 3673.06 4
1 3 -2 201850 3565.46 1
-4 1 -2 207980 3614.19 1
3 -4 -2 201429 3429.84 2
3 -4 -2 204185 3634.69 3
-4 1 1 706067 11214.2 4
1 3 1 707267 11319.8 3
3 -4 1 678292 11273.3 2
-4 1 4 35429.9 1087.55 4
1 3 4 36369.2 1067.91 3
1 3 4 35107 965.398 4
-4 1 7 169.175 161.949 4
1 3 7 104.167 122.37 4
-4 1 10 16328 1022.06 4
3 -4 10 17539.6 982.961 4
1 3 10 17672 974.252 4
3 -4 13 1943.98 405.154 4
-4 1 13 1248.06 361.577 4
1 3 13 2265.06 406.401 4
0 3 -12 597.46 293.498 2
3 -3 -12 127.031 238.794 2
0 3 -9 2010.37 386.988 2
3 -3 -9 2851.82 412.379 2
3 -3 -6 49754.1 1474.42 2
0 3 -6 50330.6 1634.78 2
-3 0 -6 50724.3 1571.11 2
3 -3 -3 16837.7 516.81 3
3 -3 -3 15443.5 586.431 4
0 3 -3 16911.6 655.964 2
3 -3 -3 15196.3 513.755 2
-3 0 0 173661 2987.94 1
0 3 0 166453 2949.3 1
0 3 3 21245.7 695.516 3
0 3 3 20828.3 641.301 4
0 3 3 21356.3 632.526 2
-3 0 6 11179.9 381.406 3
0 3 6 11376 601.207 4
-3 0 6 11779.2 655.888 4
3 -3 9 205.197 159.612 4
-3 0 9 318.622 225.714 4
0 3 9 270.077 157.293 4
-3 0 12 4931.65 614.839 4
0 3 12 5130.78 600.615 4
3 -3 12 5019.43 582.448 4
-1 3 -13 2273.01 527.172 2
3 -2 -13 2659.43 491.722 2
3 -2 -10 10455.3 833.546 2
-1 3 -10 11481.4 924.83 2
-2 -1 -7 9125.82 635.736 2
-1 3 -7 9435.62 692.998 2
3 -2 -7 10593.1 667.497 2
-1 3 -4 95653.8 2227.88 2
3 -2 -4 96622.5 2058.13 2
-1 3 -1 278637 4717.97 2
3 -2 -1 272256 4690.85 4
-2 -1 -1 280099 4713.54 1
-1 3 2 309724 5405.39 3
-1 3 2 316674 5234.84 2
-1 3 5 133037 2811.65 4
-2 -1 5 135076 2402.92 3
-1 3 5 137739 2756.35 3
-2 -1 8 1682.4 316.892 4
-1 3 8 1641.72 270.367 4
3 -2 8 1258.67 243.98 4
3 -2 11 11473.7 821.312 4
-2 -1 11 12017.4 894.846 4
-1 3 11 10952.1 826.601 4
3 -1 -14 9979.03 1012.09 2
3 -1 -11 13745.6 1040.16 2
-2 3 -11 11810.3 996.183 2
3 -1 -8 3139.83 416.225 2
-2 3 -8 2211.69 403.458 2
-1 -2 -8 3071.33 398.242 2
-2 3 -5 18881.3 862.766 2
-1 -2 -5 17466.8 741.02 2
3 -1 -5 18678.1 781.082 2
-1 -2 -2 60380.7 1212.06 4
-2 3 -2 63997.4 1409.54 2
-1 -2 1 587228 9431.8 3
-1 -2 1 583760 9521.37 1
3 -1 1 576800 9504.8 1
-2 3 4 56086.3 1407.79 4
-2 3 4 56560.3 1322.96 3
-2 3 7 40173.8 1363.73 4
-1 -2 7 40910.4 1011.69 3
3 -1 7 38822.4 1255.76 4
3 -1 10 14338.6 859.721 4
-2 3 10 16691.1 987.845 4
-1 -2 10 16123.1 984.971 4
3 -1 13 7562.58 723.736 4
-1 -2 13 7048.02 753.192 4
-2 3 13 8352.63 814.11 4
3 0 -15 3947.26 708.816 2
-3 3 -12 5415.91 736.981 2
3 0 -12 5217.16 691.376 2
0 -3 -9 575.195 231.494 2
-3 3 -9 288.903 251.736 2
3 0 -9 252.338 224.867 2
3 0 -6 10567.3 651.666 2
0 -3 -6 11147.2 619.662 2
-3 3 -6 12381.2 740.488 2
-3 3 -3 21308.9 761.252 2
0 -3 -3 20656.7 635.043 4
0 -3 0 165675 2884.55 1
3 0 0 164754 2913.02 1
0 -3 0 165431 2904.15 3
-3 3 3 16340 606.742 4
3 0 3 16980.1 477.805 4
-3 3 6 52201.9 1300.16 3
3 0 6 49411.8 1347.4 4
-3 3 6 50416.7 1508.92 4
0 -3 9 2568.74 375.273 4
3 0 9 2362.14 330.588 4
-3 3 9 2977.4 414.629 4
3 0 12 -275.028 207.788 4
0 -3 12 209.141 160.114 4
-3 3 12 -94.3645 182.981 4
3 1 -13 10422.8 1035.74 2
1 -4 -10 4605.87 530.02 2
3 1 -10 4520.96 594.262 2
-4 3 -10 3453.46 545.376 2
-4 3 -7 70420.9 2099.13 2
3 1 -7 64457.7 1996.48 2
1 -4 -7 65054.1 1839.24 2
3 1 -4 196325 3880.57 2
-4 3 -4 198361 3926.37 2
1 -4 -4 194987 3629.05 2
1 -4 -4 200561 3735.79 4
3 1 -1 562781 9543.04 1
1 -4 -1 576218 9575.96 3
-4 3 -1 578915 9362.69 1
1 -4 2 150518 2566.8 1
-4 3 2 145715 2795.84 4
3 1 5 275029 4936.14 4
-4 3 5 274708 5200.71 4
-4 3 8 22936.1 1079.07 4
3 1 8 22678.3 953.139 4
1 -4 11 1659.2 364.851 4
-4 3 11 1463.45 346.159 4
3 1 11 1702.53 319.55 4
3 2 -14 1949.38 517.644 2
3 2 -11 8086.88 840.984 2
3 2 -8 150784 3747.98 2
-5 3 -8 154204 3792.42 2
2 -5 -8 153826 3464.7 2
2 -5 -5 86447 1916.62 2
-5 3 -5 83765.7 2183.16 2
3 2 -5 87196.3 2188.23 2
2 -5 -2 155713 2891.72 3
3 2 -2 149274 2823.96 1
-5 3 -2 153714 2652.38 1
3 2 -2 146219 2546.68 3
2 -5 1 174223 2921.36 1
-5 3 1 174524 3084.65 4
2 -5 1 164545 3079.09 2
3 2 1 164635 3136.53 1
3 2 4 89349.1 1833.76 4
-5 3 4 93721 2112.16 4
3 2 7 16448.1 730.587 4
-5 3 7 15760.9 843.444 4
2 -5 10 2417.25 388.381 4
-5 3 10 2116.74 380.406 4
3 2 10 2669.67 371.987 4
2 -5 13 1214.5 352.593 4
3 3 -12 3074.73 584.756 2
3 3 -9 31883.9 1523.42 2
3 -6 -9 31465.1 1282.53 2
3 3 -6 18365 917.183 2
3 -6 -6 18154 739.185 2
3 3 -3 57219.4 1394.83 1
3 -6 -3 58221.6 1143.67 2
3 -6 -3 59973 1451.03 4
-6 3 -3 59413.1 1285.82 1
3 -6 -3 60352.2 1466.51 3
3 -6 0 981642 15889.8 2
3 3 0 981614 16087.5 3
3 3 0 970906 16150.5 1
-6 3 3 192368 3682.65 4
-6 3 6 30140.6 1166.51 4
3 3 6 31166.7 991.31 4
-6 3 9 25186.4 1246.48 4
3 3 9 25336 1084.72 4
-6 3 12 9978.36 904.292 4
3 -6 12 9879.14 849.692 4
3 4 -13 6242.8 863.142 2
4 -7 -10 3438.08 429.528 2
3 4 -10 3362.03 419.299 1
3 4 -10 3393.16 549.698 2
3 4 -7 111613 2597.14 1
4 -7 -7 110956 2531.64 2
3 4 -7 110622 2947.08 2
4 -7 -4 266536 4933.94 3
4 -7 -4 264006 4530.24 2
3 4 -4 255463 4816.33 1
3 4 -1 371300 6520.84 1
3 4 -1 375527 6389.02 3
3 4 2 13965 604.441 3
4 -7 2 12713.6 319.254 1
-7 3 2 12710.6 529.539 4
-7 3 5 36261.3 1232.52 4
-7 3 8 3159.18 440.491 4
-7 3 11 53344.5 2130.97 4
4 -7 11 53102.8 2003.94 4
2 4 -14 -541.203 407.841 2
2 4 -11 8518.93 890.786 2
4 -6 -11 8208.79 719.256 2
2 4 -8 1572.77 328.713 2
4 -6 -8 1884.58 283.848 2
4 -6 -5 120644 2575.17 3
4 -6 -5 121183 2475.63 2
2 4 -5 121052 2525.99 1
2 4 -5 118089 2820.42 2
2 4 -2 301788 5282.46 1
2 4 1 28475.3 843.713 1
2 4 1 29786.5 860.828 3
-6 2 1 28062.2 747.845 4
-6 2 4 68060.9 1724.73 4
-6 2 7 74958.8 2160.45 4
2 4 7 77481.1 1964.88 4
2 4 10 3163.69 410.461 4
-6 2 10 2419.99 420.332 4
4 -6 13 305.256 234.071 4
4 -5 -12 10684.8 889.877 2
1 4 -12 10260.4 1012.97 2
1 4 -9 54874.5 2087.35 2
4 -5 -9 56708.1 1878.2 2
4 -5 -6 4046.42 354.759 2
1 4 -6 5335.28 487.473 2
4 -5 -3 18640.5 525.14 2
4 -5 -3 18857.8 641.917 3
1 4 -3 19382.8 751.077 2
4 -5 -3 18666.9 685.436 4
1 4 -3 17861.4 584.003 1
1 4 0 226948 4028.56 1
1 4 0 228697 4038.28 3
4 -5 0 227355 3904.39 2
-5 1 0 228520 3839.83 4
1 4 3 72185.4 1719.84 3
-5 1 3 74461.6 1704.28 4
-5 1 6 6491.09 508.291 4
1 4 6 5720.47 416.1 4
1 4 9 50906.2 1702.64 4
-5 1 9 53182.5 1871.28 4
-5 1 12 8419.25 823.52 4
4 -5 12 8664.51 773.653 4
1 4 12 10297.1 819.555 4
0 4 -13 1427.77 463.615 2
4 -4 -13 1461.1 399.023 2
4 -4 -10 7454.47 680.551 2
0 4 -10 6255.4 712.661 2
0 4 -7 31613.3 1338.19 2
4 -4 -7 31383.2 1178.99 2
0 4 -4 39683 1007.9 1
4 -4 -4 41686.1 1075.23 2
4 -4 -4 42139.5 1052.54 3
0 4 -4 44559 1309.2 2
-4 0 -1 506511 8447.01 1
0 4 -1 503520 8360.24 1
0 4 2 54767.1 1302.55 3
0 4 5 102278 2278.63 4
-4 0 5 107388 2449.94 4
0 4 8 51214.5 1644.35 4
-4 0 8 53857.1 1786.74 4
-4 0 11 13065.6 971.075 4
4 -4 11 13678.3 905.66 4
0 4 11 13586.6 915.283 4
-1 4 -14 10116.9 1100.81 2
-1 4 -11 2231.32 473.937 2
4 -3 -11 1820.26 387.045 2
-1 4 -8 24165.7 1231.16 2
4 -3 -8 21664.2 1054.27 2
-1 4 -5 281895 5423.62 2
4 -3 -5 271813 5108.52 2
-3 -1 -2 145741 2480.46 4
-1 4 -2 148281 2798.86 2
-1 4 -2 144640 2502.09 1
4 -3 -2 143741 2735.87 4
4 -3 1 569392 9273.59 1
-3 -1 1 567026 9470.53 1
-1 4 4 198650 3788.52 4
-1 4 4 202886 3811.38 3
-3 -1 7 68165.5 1331.69 3
-1 4 7 67254.6 1857.62 4
-3 -1 7 64770.7 1923.89 4
4 -3 10 3570.82 424.997 4
-3 -1 10 3778.13 487.223 4
-1 4 10 4441.29 507.331 4
-3 -1 13 11946.2 1005.83 4
-1 4 13 11029.4 923.021 4
4 -2 -12 18950.4 1258.26 2
-2 4 -12 20308.8 1398.47 2
4 -2 -9 59220.6 2030.42 2
-2 4 -9 60325.7 2173.31 2
-2 4 -6 49530.5 1644.22 2
4 -2 -6 46461.6 1443.08 2
-2 4 -3 41631.1 1169.9 2
4 -2 -3 41693.5 876.859 3
-2 -2 -3 40739.7 936.185 4
-2 4 0 277007 4549.92 2
-2 -2 0 277407 4709.88 1
4 -2 0 275411 4657.29 1
4 -2 0 267362 4567.92 4
-2 4 3 239173 4032.95 2
-2 4 3 225288 4195.21 3
-2 4 3 230189 4221.31 4
-2 4 6 10409 591.399 4
-2 -2 6 10584.2 348.681 3
-2 -2 9 68452.8 2152.74 4
-2 4 9 68515 2104.19 4
4 -2 9 66935.1 1965.31 4
-2 4 12 4508.47 570.17 4
4 -2 12 3407.77 462.033 4
-2 -2 12 3726.72 555.792 4
-3 4 -13 1264.03 415.533 2
4 -1 -13 1418.64 407.181 2
4 -1 -10 17397.6 1101.66 2
-3 4 -10 15730.4 1116.57 2
4 -1 -7 -67.2914 160.964 2
-3 4 -7 26.8014 194.267 2
-1 -3 -4 35964.5 972.23 4
-3 4 -4 36129.6 1181.4 2
-3 4 -1 693269 11482.9 2
4 -1 -1 685493 11505.1 1
-1 -3 -1 709154 11533.4 3
-1 -3 2 204965 3525.56 1
4 -1 2 195108 3521.93 1
-3 4 5 19683.4 694.695 3
4 -1 5 18383.1 653.386 4
-3 4 5 19435.1 790.563 4
4 -1 8 13271 709.237 4
-3 4 8 13368.9 799.95 4
-3 4 11 634.171 249.785 4
4 -1 11 654.783 228.885 4
-1 -3 11 619.082 257.867 4
4 0 -14 1443.2 443.704 2
-4 4 -11 13137.3 1059.77 2
4 0 -11 12550.9 1017.02 2
-4 4 -8 55320.9 1997.82 2
4 0 -8 61321.7 1994.41 2
4 0 -5 109494 2551.77 2
-4 4 -5 112301 2672.49 2
-4 4 -2 56477 1347.66 2
0 -4 -2 56985.8 1334.28 3
0 -4 1 501879 8235.3 1
4 0 1 491244 8341.3 1
4 0 4 39813.2 956.217 4
-4 4 4 41610.1 1191.56 4
-4 4 7 30219.5 1190.95 4
4 0 7 30158.3 1025.51 4
4 0 10 7541.32 595.056 4
-4 4 10 7355.45 668.359 4
0 -4 10 7655.15 675.268 4
0 -4 13 1007.13 332.854 4
-4 4 13 796.052 314.073 4
4 1 -12 5255.22 707.163 2
-5 4 -9 20420.1 1200.66 2
4 1 -9 22873.3 1240.82 2
1 -5 -6 20229.3 805.92 2
-5 4 -6 20045.9 977.348 2
4 1 -6 20209.4 939.459 2
-5 4 -3 69974.7 1309.38 1
4 1 -3 64878.9 1582.24 1
1 -5 -3 69762.5 1638.44 3
1 -5 -3 70214 1557.61 4
4 1 0 382081 6572.68 1
1 -5 0 385123 6482.82 1
-5 4 3 107445 2277.04 4
4 1 6 19377.3 724.353 4
-5 4 6 19397.9 882.13 4
-5 4 9 18774 1045.58 4
4 1 9 18271.6 881.637 4
-5 4 12 366.362 189.721 4
1 -5 12 219.311 185.363 4
4 2 -13 5374.18 792.471 2
4 2 -10 22029 1316.09 2
2 -6 -7 79249.7 2008.09 2
4 2 -7 77903.1 2294.32 2
4 2 -4 34402.1 1070.9 1
2 -6 -4 35118.8 1102.84 3
-6 4 -4 39275.4 905.152 1
2 -6 -1 443129 7599.72 3
4 2 -1 438728 7561.51 1
-6 4 2 11838.6 502.449 4
2 -6 2 11770.3 346.571 1
4 2 2 10574.1 493.464 1
-6 4 5 126958 2816.96 4
4 2 5 122911 2458.53 4
4 2 8 46370.8 1424.05 4
-6 4 8 45206.4 1650.03 4
-6 4 11 2636.27 452.895 4
4 2 11 2633.75 381.432 4
2 -6 11 2893.01 457.505 4
4 3 -14 808.852 411.076 2
4 3 -11 5305.27 717.685 2
4 3 -11 6026.23 593.557 1
4 3 -8 48565.4 1858.73 2
3 -7 -8 50860.1 1565.2 2
3 -7 -5 21618.3 870.081 3
4 3 -5 22400.6 994.377 2
4 3 -5 23074.5 866.933 1
3 -7 -5 22017.5 708.012 2
4 3 -2 192997 3680.51 1
-7 4 -2 202580 3489.13 1
4 3 -2 190516 3404.71 3
3 -7 -2 196572 3765.74 3
4 3 1 145798 2920.54 1
3 -7 1 148912 2655.81 1
-7 4 4 81946.2 2004.92 4
-7 4 7 3687.06 422.801 4
-7 4 10 17148.9 1091.17 4
3 -7 13 420.689 264.551 4
4 4 -12 932.714 383.493 2
4 4 -9 7965.69 611.731 1
4 4 -9 7424.37 742.895 2
4 4 -6 20727.1 876.075 1
4 -8 -6 20067.4 733.184 2
4 -8 -6 20658.3 894.893 3
4 4 -6 21257.5 1042.3 2
4 -8 -3 247771 4696.34 3
4 4 -3 243587 4587.89 1
4 4 0 27696.3 863.431 3
4 4 0 29073.4 943.441 1
4 -8 0 30120.6 735.275 2
-8 4 3 17487.9 715.984 4
-8 4 6 28245.6 1165.26 4
-8 4 9 45153.6 1764 4
-8 4 12 174.725 230.116 4
4 -8 12 736.781 285.587 4
4 5 -13 4877.1 784.763 2
4 5 -10 6283.11 746.222 2
4 5 -10 8015.93 651.088 1
4 5 -7 6297.98 602.79 2
5 -9 -7 7708.33 450.738 2
4 5 -7 7706.71 544.843 1
5 -9 -4 7543.87 506.439 3
4 5 -4 8156.34 486.486 1
4 5 -1 21576.6 808.895 1
4 5 -1 22284.5 730.697 3
5 -9 2 33981.6 748.206 1
4 5 2 32934.4 1107.89 1
-9 4 2 33414.9 998.798 4
-9 4 5 1538.09 270.863 4
-9 4 8 16752.4 997.188 4
-9 4 11 477.191 269.05 4
3 5 -14 5691.62 868.53 2
3 5 -11 3874.61 620.013 2
3 5 -8 102075 2505.83 1
5 -8 -8 93643.4 2393.58 2
3 5 -8 104122 2977.99 2
3 5 -5 8428.07 487.347 1
3 5 -5 7948.92 604.612 2
5 -8 -5 6970 362.227 2
5 -8 -5 6548.59 466.037 3
3 5 -2 78386.5 1793.23 1
-8 3 1 114088 2273.43 4
3 5 1 119313 2474.28 3
3 5 1 115442 2466.17 1
-8 3 4 17895.9 782.906 4
-8 3 7 10671.5 726.525 4
-8 3 10 5746.11 645.485 4
5 -8 13 3428.75 553.728 4
2 5 -12 3475.58 620.479 2
2 5 -9 14138.2 772.146 1
2 5 -9 13430.2 1003.97 2
5 -7 -9 13983.1 812.802 2
2 5 -6 17438.7 942.539 2
2 5 -6 18115.8 749.417 1
5 -7 -6 17271.3 759.223 3
5 -7 -6 17687.3 722.152 2
2 5 -3 18248.6 648.825 1
5 -7 -3 18137.6 713.724 3
5 -7 -3 18488.8 468.882 2
5 -7 0 504773 8491.15 2
-7 2 0 509874 8417.52 4
2 5 0 519344 8679.83 3
2 5 0 504185 8694.56 1
-7 2 3 19151.2 732.506 4
-7 2 6 10876.6 680.188 4
-7 2 9 22696.6 1194.24 4
5 -7 12 10025.1 835.732 4
-7 2 12 11099.8 970.849 4
1 5 -13 393.264 345.198 2
1 5 -10 9047.28 872.463 2
5 -6 -10 9791.26 741.602 2
1 5 -7 17838.6 1015.85 2
1 5 -7 18019.9 757.473 1
5 -6 -7 18380 836.518 2
5 -6 -4 116248 2366.83 2
1 5 -4 131427 2811.75 2
1 5 -4 126918 2453.26 1
5 -6 -4 123620 2544.37 3
1 5 -1 36748.3 946.659 1
1 5 2 10495.9 505.171 3
-6 1 2 9642.66 440.46 4
-6 1 5 4300.87 401.004 4
-6 1 8 9223.97 703.558 4
5 -6 11 10058.4 789.685 4
-6 1 11 10505.8 892.082 4
0 5 -14 6814.27 906.625 2
5 -5 -11 87.7435 178.763 2
0 5 -11 -48.8501 279.013 2
0 5 -8 4925.49 555.544 2
5 -5 -8 4805.56 461.365 2
0 5 -5 11712.5 487.939 1
5 -5 -5 11483.8 540.153 2
5 -5 -5 11472.8 516.265 3
0 5 -5 12622.2 726.897 2
0 5 -2 325732 5816.88 2
0 5 -2 326568 5571.47 1
5 -5 -2 331046 5764.74 4
0 5 1 655905 11009.4 3
-5 0 7 5263.15 506.811 4
0 5 7 5036.82 433.667 4
5 -5 10 21625.3 1085.51 4
-5 0 10 23114.3 1238.62 4
0 5 10 20524.6 1087.97 4
5 -4 -12 -239.509 280.603 2
-1 5 -12 869.991 381.865 2
5 -4 -9 19759.6 1059.29 2
-1 5 -9 19958.5 1208.97 2
5 -4 -6 20256 850.278 2
-1 5 -6 20297.8 1001.98 2
5 -4 -3 103557 2201.31 4
-1 5 -3 102915 1905.11 1
-1 5 -3 104324 2278.52 2
-1 5 3 67240.5 1377.34 2
-1 5 3 69988.5 1627.65 3
-1 5 6 20689.6 860.789 4
-4 -1 9 20702.1 1105.89 4
5 -4 9 20657.2 986.904 4
-1 5 9 20194.6 1030.07 4
-4 -1 12 5055.08 634.538 4
5 -4 12 5849.28 608.71 4
-1 5 12 5478.64 629.107 4
-2 5 -13 522.414 322.234 2
5 -3 -13 1035.99 341.217 2
5 -3 -10 1911.47 357.45 2
-2 5 -10 3115.94 521.305 2
5 -3 -7 15653.1 819.035 2
-2 5 -7 16266.1 960.825 2
-3 -2 -4 93552.3 1834.6 4
5 -3 -4 90207.2 1770.93 3
-2 5 -4 91754.5 2201.56 2
-2 5 -4 87727.3 1696.59 1
5 -3 -1 173631 3092.32 4
-2 5 -1 168726 3102.76 2
5 -3 2 149551 2643.71 1
-2 5 5 84020.9 2015.58 4
-2 5 8 152115 3508.75 4
5 -3 8 151849 3322.27 4
-3 -2 8 153875 3601.55 4
-3 -2 11 7357.7 728.643 4
-2 5 11 7625.02 712.895 4
5 -3 11 8209.6 670.611 4
-3 5 -14 10138.6 1090.42 2
5 -2 -14 9158.95 986.624 2
-3 5 -11 276.903 266.112 2
5 -2 -11 -174.668 206.541 2
-3 5 -8 124792 3276.69 2
5 -2 -8 114620 3013.2 2
5 -2 -5 52232.5 1482.96 2
-3 5 -5 56129.9 1684.26 2
-2 -3 -5 52668.5 1326.64 4
-3 5 -2 214540 3881.2 2
5 -2 -2 203999 3784.49 4
5 -2 1 692535 11428.9 1
-2 -3 1 696792 11363.6 3
-3 5 4 188266 3675.6 4
-3 5 7 56841.1 1722.34 4
-2 -3 7 56933.4 1144.06 3
5 -2 7 56558.6 1533.43 4
-3 5 10 14671 950.257 4
-2 -3 10 14162.9 953.213 4
5 -2 10 15955.7 871.542 4
-3 5 13 11467.7 968.248 4
-2 -3 13 10522.4 950.775 4
5 -1 -12 9161.25 932.068 2
-4 5 -12 8385.36 905.401 2
5 -1 -9 51487.1 1916.77 2
-4 5 -9 55755.2 2097.52 2
-4 5 -6 5526.61 511.65 2
5 -1 -6 5681.4 475.612 2
-1 -4 -3 72325.3 1535.02 4
-4 5 -3 72949.9 1773.42 2
-1 -4 0 227303 3977.34 3
5 -1 0 221751 3981.71 1
5 -1 3 18991 470.43 4
-4 5 6 4285.21 403.423 4
5 -1 6 3973.48 301.689 4
-4 5 9 59663.6 1977.17 4
5 -1 9 59558.2 1762.04 4
-1 -4 12 9721.69 874.946 4
-4 5 12 10783.4 911.105 4
5 0 -13 17931.1 1359.66 2
5 0 -10 22271.3 1286.63 2
-5 5 -10 20854.9 1300.5 2
-5 5 -7 4917.84 548.778 2
5 0 -7 5121.2 505.181 2
0 -5 -4 13940.3 564.109 4
-5 5 -4 12557.3 662.499 2
-5 5 -4 13265.2 370.379 1
0 -5 -1 648215 10848.6 3
5 0 -1 642456 10824.1 1
0 -5 2 341642 5643.63 1
5 0 2 317003 5769.92 1
-5 5 5 11090.7 618.864 4
5 0 5 11886.4 467.173 4
5 0 8 5577.25 429.325 4
-5 5 8 4471.74 492.627 4
-5 5 11 27.13 182.032 4
5 0 11 90.9375 136.758 4
0 -5 11 -78.1344 208.859 4
5 1 -14 5414.76 798.525 2
5 1 -11 5828.27 722.542 2
5 1 -8 22440.7 1151.97 2
-6 5 -8 21795.7 1188.65 2
-6 5 -5 16103.5 833.774 2
-6 5 -5 15435 491.034 1
1 -6 -2 254367 4660.97 3
5 1 -2 250766 4612.74 1
1 -6 1 159427 2818.01 1
5 1 1 146824 2964.46 1
-6 5 4 528.692 156.504 4
5 1 7 40019.9 1190.14 4
-6 5 7 41257.7 1469.24 4
5 1 10 1920.32 307.732 4
-6 5 10 1450.81 330.481 4
1 -6 13 4512.35 646.884 4
5 2 -12 1627.27 453.852 2
5 2 -9 3076.99 489.588 2
5 2 -6 7416.32 586.211 2
-7 5 -3 7678.89 292.604 1
5 2 -3 6973.49 227.844 3
5 2 -3 7708.36 448.346 1
2 -7 -3 7503.33 468.182 3
5 2 0 12704 555.306 1
-7 5 3 26460.2 911.285 4
2 -7 3 27476.7 657.187 1
-7 5 6 51544.5 1631.39 4
5 2 9 15886.4 797.39 4
-7 5 9 16621.4 1006.3 4
-7 5 12 3564.38 552.786 4
2 -7 12 4031.86 560.103 4
5 3 -13 2174.79 502.787 2
5 3 -10 16968.5 984.4 1
5 3 -10 14817.1 1107.89 2
5 3 -7 701.872 195.242 1
5 3 -7 1190.18 285.118 2
5 3 -4 209254 4134.35 1
3 -8 -4 214124 4216.38 3
5 3 -1 282100 4936.14 3
5 3 -1 276469 5132.02 1
5 3 2 809.003 170.862 1
3 -8 2 465.704 77.156 1
-8 5 2 490.716 143.171 4
-8 5 5 29402 1115.02 4
-8 5 8 17.2435 159.614 4
-8 5 11 1637.9 396.613 4
5 4 -14 3466.55 686.893 2
5 4 -11 9710.18 958.018 2
5 4 -8 722.536 294.465 2
5 4 -8 869.037 210.66 1
5 4 -5 85200.4 2109.2 1
4 -9 -5 84996.7 2183.69 3
4 -9 -2 112284 2525.65 3
5 4 -2 112540 2185.83 3
5 4 -2 109407 2444.02 1
5 4 1 190382 3773.03 1
-9 5 4 40956.5 1302.66 4
-9 5 7 21445.4 1070.14 4
-9 5 10 6284.4 680.234 4
5 5 -12 5217.25 767.154 2
5 5 -9 12312.9 966.146 2
5 5 -9 12488.6 798.551 1
5 5 -6 2759.58 333.351 1
5 5 -6 2149.76 369.668 2
5 -10 -6 2655.65 355.744 3
5 5 -3 76311.2 1904.6 1
5 -10 -3 75904.4 1991.58 3
5 5 0 17941.2 707.052 3
5 5 0 16843.4 749.851 1
-10 5 3 55167.5 1507.29 4
5 -10 3 55361.5 1058.12 1
-10 5 6 5421.78 505.553 4
-10 5 9 6183.53 647.654 4
5 6 -13 1497.25 508.773 2
5 6 -10 2330.9 373.186 1
5 6 -10 1639.15 406.191 2
6 -11 -7 5949.22 533.643 3
5 6 -7 5873.73 503.307 1
5 6 -7 5600.92 605.372 2
5 6 -4 31224 1113.98 1
6 -11 -4 32026.7 1211 3
5 6 -1 305097 5706.14 1
5 6 -1 300292 5495.52 3
5 6 2 21399 929.113 1
-11 5 2 20321.3 784.783 4
6 -11 2 21971.3 610.717 1
-11 5 5 30119.2 1197.41 4
-11 5 8 34623.8 1517.02 4
-11 5 11 -308.79 306.758 4
4 6 -11 -39.5557 341.431 2
4 6 -8 19743.8 949.173 1
4 6 -8 19369.3 1172.51 2
4 6 -5 5657.99 427.518 1
4 6 -5 4363.84 491.03 2
6 -10 -5 5152.86 445.354 3
4 6 -2 33966.6 950.24 3
4 6 -2 34323.3 1103.58 1
-10 4 1 154691 3023.82 4
4 6 1 161581 3316.33 1
-10 4 4 39224 1286.78 4
-10 4 7 65553.7 2068.79 4
-10 4 10 24932.2 1376.19 4
6 -10 13 11617.3 975.818 4
3 6 -12 5363.29 771.897 2
3 6 -9 1452.53 269.769 1
3 6 -9 1229.69 343.887 2
6 -9 -9 1599.26 267.93 2
6 -9 -6 7623.47 533.313 3
3 6 -6 8543.41 534.233 1
3 6 -6 8635.46 680.27 2
6 -9 -6 8292.74 424.831 2
3 6 -3 66824.3 1648.03 1
6 -9 -3 65671.2 1735.92 3
3 6 0 74705 1711.3 3
6 -9 0 68150.5 1493.27 2
3 6 0 70910.8 1726.49 1
-9 3 3 434.539 139.648 4
-9 3 6 55067.1 1749.18 4
-9 3 9 28792.4 1405.14 4
6 -9 12 2695.61 459.549 4
-9 3 12 2923.31 533.044 4
2 6 -13 8250.52 1017.22 2
6 -8 -10 938.139 235.123 2
2 6 -10 1007 382.526 2
6 -8 -7 1502.69 221.237 2
2 6 -7 1851.04 252.673 1
2 6 -7 1511.94 352.453 2
2 6 -4 47444 1265.38 1
6 -8 -4 48564.9 1379.83 3
6 -8 -4 46834.3 1049.66 2
2 6 -4 48768.2 1528.56 2
6 -8 -1 118504 2099.66 2
2 6 -1 112949 2322.19 3
2 6 -1 111898 2396.28 1
-8 2 2 5156.44 340.603 4
-8 2 5 15827 789.889 4
-8 2 8 93616.1 2662.56 4
-8 2 11 5699.27 690.904 4
1 6 -14 3264.57 663.521 2
6 -7 -11 9384.09 763.195 2
1 6 -11 9788.88 980.235 2
6 -7 -8 13034.5 742.288 2
1 6 -8 13863.6 959.706 2
1 6 -8 13096.7 683.245 1
1 6 -5 21619.8 977.46 2
6 -7 -5 20645.1 795.586 3
6 -7 -5 20258.1 718.613 2
1 6 -5 20894.3 735.968 1
1 6 -2 81407.1 1743.34 1
-7 1 1 124666 2433 4
1 6 1 132287 2650.61 3
-7 1 4 57392.1 1585.22 4
-7 1 7 12134.5 770.974 4
-7 1 10 46113.4 1877.21 4
0 6 -12 12211 1135.73 2
6 -6 -9 15335.9 897.225 2
0 6 -9 16833.8 1115.95 2
0 6 -9 15466 750.03 1
0 6 -6 11828.9 778.555 2
6 -6 -6 11715 599.838 2
0 6 -6 11283.6 537.161 1
6 -6 -6 11852.8 566.592 3
0 6 -3 16758 557.863 1
0 6 -3 18579.5 757.129 2
0 6 0 159539 3005.06 1
-6 0 6 66310.9 1899.46 4
-6 0 9 9262.55 752.175 4
6 -6 12 4109.46 519.657 4
-6 0 12 2558.38 480.59 4
-1 6 -13 4116.32 697.15 2
-1 6 -10 1391.87 395.015 2
6 -5 -10 1202.4 300.614 2
-1 6 -7 40208.4 1590.9 2
-1 6 -7 39478 1135.22 1
6 -5 -7 39801.2 1352.62 2
-1 6 -4 458.012 84.2051 1
-1 6 -4 647.32 199.915 2
6 -5 -4 404.567 113.991 3
-1 6 -1 149737 2817.45 2
6 -5 -1 150813 2830.8 4
-1 6 -1 147432 2717.24 1
-1 6 2 255937 4683.34 3
6 -5 2 253799 4281.61 1
-5 -1 8 20379.4 1058.69 4
-5 -1 11 6181.51 680.768 4
6 -5 11 7029.92 622.483 4
-2 6 -14 12474.3 1241.92 2
-2 6 -11 2190.21 481.22 2
6 -4 -11 1914.44 382.936 2
-2 6 -8 45855.7 1808.68 2
6 -4 -8 42574.9 1557.34 2
6 -4 -5 123516 2640.58 2
-2 6 -5 119948 2301.44 1
-2 6 -5 125214 2926.24 2
6 -4 -5 123007 2385.97 3
6 -4 -2 11095.2 481.031 4
-2 6 -2 11648 523.001 2
-2 6 -2 11906.4 343.113 1
6 -4 1 430303 7208.13 1
-2 6 4 35284.3 877.846 2
-2 6 7 77531.6 2101.14 4
-4 -2 10 20312.3 1183.81 4
-2 6 10 23349.4 1186.76 4
6 -4 10 21934 1051.09 4
6 -3 -12 11080.6 970.326 2
-3 6 -12 10919.7 1054.32 2
-3 6 -9 27006.3 1412.22 2
6 -3 -9 25247.1 1244.87 2
6 -3 -6 31182.1 1131.47 2
-3 6 -6 33843.6 1354.56 2
-3 6 -3 192325 3742.94 2
-3 -3 -3 187728 3343.92 4
6 -3 0 967127 15973.3 1
-3 6 0 976035 15805.7 2
6 -3 0 941993 15821.8 4
6 -3 3 58078.3 1261.93 1
-3 6 6 19832.2 878.284 4
6 -3 9 30329.2 1182.73 4
-3 -3 9 32707.9 1417.83 4
-3 6 9 30827.7 1342.59 4
-3 -3 12 3541.14 548.087 4
-4 6 -13 1337.99 473.833 2
6 -2 -13 -415.43 260.673 2
-4 6 -10 2885.85 530.88 2
6 -2 -10 2757.22 467.744 2
6 -2 -7 75914.6 2148.88 2
-4 6 -7 78775.7 2369.59 2
-4 6 -4 66973.9 1810.63 2
-2 -4 -4 63681.7 1469.41 4
6 -2 -4 66482.3 1281.17 3
6 -2 -1 28193.9 741.809 4
6 -2 -1 27705.2 823.674 1
-4 6 -1 27509.9 767.083 2
6 -2 2 303483 5311.81 1
-2 -4 2 306037 5166.11 3
6 -2 5 119434 2351.82 4
-4 6 5 120070 2693.32 4
-4 6 8 1775.41 318.496 4
6 -2 8 2004.26 270.611 4
-4 6 11 8481.72 770.567 4
-2 -4 11 7749.29 757.078 4
6 -2 11 8087.78 638.661 4
6 -1 -14 -372.449 291.008 2
6 -1 -11 11070.9 953.207 2
-5 6 -11 11100.5 1016.83 2
6 -1 -8 8653.09 688.639 2
-5 6 -8 10860.2 836.397 2
-5 6 -5 3604.77 401.526 2
-5 6 -5 3786.59 181.974 1
-5 6 -2 9598.95 470.177 2
6 -1 -2 8962.47 459.213 1
-1 -5 -2 9922.58 498.393 3
6 -1 1 36650.4 957.071 1
-1 -5 1 34325.3 889.212 3
6 -1 4 124917 2284.55 4
-5 6 4 126862 2726.33 4
6 -1 7 19047.8 745.298 4
-5 6 7 19701.6 956.663 4
-5 6 10 9516.52 779.658 4
6 -1 10 10864 683.319 4
-1 -5 10 9020.96 777.967 4
6 0 -12 3413.87 598.469 2
-6 6 -9 9632.69 826.435 2
6 0 -9 8462.71 754.092 2
-6 6 -6 69243.4 1417.02 1
6 0 -6 64992.9 1953.46 2
-6 6 -6 67794.3 2076.85 2
0 -6 -3 39454.6 1192.58 3
6 0 -3 39296.4 1171.6 1
-6 6 -3 39921.3 1222.02 2
6 0 0 158372 3067.75 1
0 -6 0 158703 3041.29 3
6 0 3 15897.9 636.831 1
-6 6 6 13233.1 737.398 4
6 0 6 11479.2 504.084 4
-6 6 9 14724.9 950.128 4
6 0 9 15250.6 760.293 4
-6 6 12 11164.8 954.359 4
0 -6 12 13166.2 1039.4 4
6 1 -13 183.993 292.618 2
6 1 -10 1002.94 343.841 2
6 1 -7 8424.36 670.133 2
-7 6 -7 8461.29 707.032 2
1 -7 -4 159529 3365.46 3
-7 6 -4 160877 2781.32 1
6 1 -4 159014 3316.71 1
6 1 -1 244188 4512.67 1
1 -7 -1 241211 4515.6 3
6 1 2 24258.9 827.454 1
-7 6 5 5684.8 465.591 4
6 1 8 9430.38 541.09 4
-7 6 8 8177.81 664.121 4
-7 6 11 16455.7 1122.7 4
6 2 -14 1470.53 472.708 2
6 2 -11 5472.37 592.49 1
6 2 -11 4401.9 656.372 2
6 2 -8 11220 848.301 2
6 2 -8 11599 753.032 1
2 -8 -5 63264.5 1773.43 3
6 2 -5 58444.5 1690.31 1
-8 6 -5 62658.3 1315.3 1
2 -8 -2 109226 2407.4 3
6 2 -2 104018 2338.61 1
6 2 1 108163 2374.39 1
-8 6 4 39743 1275.07 4
-8 6 7 6744.51 580.775 4
-8 6 10 14604.3 1008 4
6 3 -12 13963.9 1200.82 2
6 3 -9 14919.7 897.749 1
6 3 -9 13794.5 996.213 2
6 3 -6 7280.91 650.793 2
6 3 -6 7093.55 541.299 1
3 -9 -3 53260.2 1537.51 3
6 3 -3 52945.8 1467.74 1
6 3 -3 50851.2 1093.26 3
6 3 0 149328 3091.12 1
-9 6 3 5456.21 420.069 4
6 3 3 6007.54 465.488 1
3 -9 3 4711.5 236.444 1
-9 6 6 2939.65 365.128 4
-9 6 9 2954.37 463.404 4
-9 6 12 3140.58 540.608 4
6 4 -13 15897.7 1376.97 2
6 4 -10 2004.14 454.374 2
6 4 -10 2793.02 416.556 1
6 4 -7 16423.5 867.857 1
6 4 -7 17315.7 1030.7 2
4 -10 -4 27317.6 1078.91 3
6 4 -4 26806.1 1017.78 1
6 4 -1 60188 1634.8 1
6 4 -1 62889.2 1506.81 3
6 4 2 63339.1 1734.59 1
-10 6 5 44932.5 1487.1 4
-10 6 8 2349 402.823 4
-10 6 11 2324.88 465.414 4
6 5 -11 4337.79 677.819 2
6 5 -8 18918.8 1150.41 2
6 5 -8 19619.1 996.213 1
6 5 -5 40162.9 1352.05 1
5 -11 -5 39189.8 1411.83 3
6 5 -2 64233.5 1521.26 3
5 -11 -2 67306.4 1846.28 3
6 5 -2 63769.9 1740.16 1
6 5 1 18259.4 824.775 1
-11 6 4 29070.1 1103.01 4
-11 6 7 3564.42 445.665 4
-11 6 10 23426.5 1349.51 4
6 6 -12 6477.29 860.469 2
6 6 -9 13876.1 1065.62 2
6 6 -9 15104.3 913.066 1
6 -12 -6 2558.23 366.946 3
6 6 -6 2793.06 359.061 1
6 -12 -3 45448.1 1531.69 3
6 6 -3 47396.2 1482.56 1
6 6 0 30797.5 1149.28 1
6 -12 3 109070 1986.89 1
-12 6 3 102139 2476.78 4
-12 6 6 10116.9 733.306 4
-12 6 9 11259.4 889.614 4
6 7 -13 4738.12 787.322 2
6 7 -10 10182.5 994.019 2
6 7 -7 4890.96 487.399 1
6 7 -7 4960.41 604.86 2
7 -13 -7 4995.32 530.422 3
6 7 -4 42023.4 1433.82 1
7 -13 -4 42591.1 1530.79 3
6 7 -1 15358.9 802.526 1
6 7 2 3116.25 389.032 1
-13 6 5 42261.2 1501.64 4
-13 6 8 5509.45 618.127 4
-13 6 11 2512.89 487.022 4
5 7 -11 3785.6 664.691 2
5 7 -8 6722.56 573.583 1
5 7 -8 6560.5 697.825 2
7 -12 -5 5886.41 512.987 3
5 7 -5 6590.91 496.471 1
5 7 -2 55857 1438.29 3
5 7 -2 56929.7 1625.49 1
5 7 1 69187.6 1919.31 1
-12 5 4 24070.9 1004.97 4
-12 5 7 56333.6 1950.51 4
-12 5 10 2020.47 424.074 4
4 7 -12 -429.575 288.338 2
4 7 -9 6183.76 725.387 2
4 7 -9 5375.11 504.413 1
7 -11 -6 21896.5 1017.91 3
4 7 -6 23319.9 1173.99 2
4 7 -6 22997.2 966.797 1
4 7 -3 102054 2373.37 1
4 7 0 188370 3834.87 1
-11 4 3 16508.1 740.119 4
-11 4 6 39284.1 1471.09 4
-11 4 9 28542 1436.2 4
3 7 -13 10884.4 1175.2 2
3 7 -10 1498.23 376.733 2
7 -10 -7 23056.4 1023.95 3
3 7 -7 22701.4 1209.69 2
7 -10 -7 22791.4 813.101 2
3 7 -7 22624.6 948.504 1
3 7 -4 12497.6 608.853 1
7 -10 -4 12629 676.8 3
7 -10 -4 11122.1 332.696 2
7 -10 -1 108900 2043.2 2
3 7 -1 109240 2428.73 1
3 7 -1 111523 2363.46 3
-10 3 2 73794.8 1745.27 4
-10 3 5 9005.52 609.076 4
-10 3 8 33584 1468.25 4
-10 3 11 1600.21 391.964 4
2 7 -11 2113.41 483.073 2
2 7 -8 417.636 153.009 1
2 7 -8 267.131 234.985 2
7 -9 -8 315.312 143.373 2
2 7 -5 13618.6 626.599 1
7 -9 -5 14231.1 517.558 2
7 -9 -5 13288.7 686.265 3
2 7 -5 13158.2 793.448 2
2 7 -2 2360.7 250.92 1
-9 2 1 32254 894.797 4
2 7 1 33168.2 1071.33 1
-9 2 4 32747.3 1136.09 4
-9 2 7 81681.8 2366.43 4
-9 2 10 6813.07 713.434 4
1 7 -12 11127 1109.01 2
1 7 -9 216.17 143.378 1
1 7 -9 -202.602 307.978 2
7 -8 -9 287.789 165.072 2
1 7 -6 40177.3 1525.73 2
1 7 -6 38029 1136.92 1
7 -8 -6 36395.4 1118.06 2
7 -8 -6 39102.3 1238.85 3
1 7 -3 52732.2 1312.15 1
1 7 -3 54488.1 1544.4 2
1 7 0 110959 2333.64 3
-8 1 0 108562 2044.29 4
1 7 0 108294 2311.22 1
-8 1 3 126368 2698.07 4
-8 1 6 12598.2 759.015 4
-8 1 9 8296.9 732.665 4
7 -8 12 276.427 188.447 4
-8 1 12 556.973 263.26 4
0 7 -13 4223.85 731.122 2
0 7 -10 267.096 272.859 2
7 -7 -10 1611.63 320.548 2
0 7 -7 36285.9 1098.94 1
7 -7 -7 34980.4 1212.3 2
7 -7 -7 34747 1141.84 3
0 7 -7 38127.1 1564.49 2
7 -7 -4 15948.4 666.193 3
0 7 -4 15759.5 570.796 1
0 7 -4 15946 778.203 2
0 7 -1 200537 3693.64 1
-7 0 -1 200625 3358.18 4
7 -7 2 112882 2024.69 1
-7 0 5 31187.7 1156.12 4
-7 0 8 20842.1 1102.39 4
-7 0 11 10047.5 891.495 4
7 -7 11 7315.14 654.161 4
-1 7 -14 864.408 404.319 2
-1 7 -11 13934.5 1165.77 2
7 -6 -11 16285.1 1047.17 2
7 -6 -8 7842.21 594.572 2
-1 7 -8 9166.76 502.015 1
-1 7 -8 9561.08 815.182 2
-1 7 -5 5427.35 492.681 2
7 -6 -5 5759.01 368.367 3
7 -6 -5 5497.01 372.308 2
-1 7 -5 5480.15 307.475 1
7 -6 -2 25274.2 828.789 4
-1 7 -2 25050.3 840.105 2
-1 7 -2 24873.5 685.997 1
7 -6 1 238454 4154.47 1
-1 7 4 157540 2919.45 2
-6 -1 7 7559.29 613.794 4
7 -6 10 1288.17 265.169 4
-6 -1 10 1158.2 312.24 4
-2 7 -12 2743.19 566.975 2
7 -5 -12 4075.28 584.002 2
-2 7 -9 17227.1 1148.56 2
7 -5 -9 15355.5 928.216 2
-2 7 -6 50562.3 1724.17 2
7 -5 -6 47361.2 1418.32 2
-2 7 -6 48538.4 1149.87 1
7 -5 -6 47193.2 1232.25 3
-2 7 -3 27172.5 958.628 2
-2 7 -3 27035.3 660.855 1
-5 -2 -3 26585.6 614.788 4
-2 7 0 13734.1 437.187 2
7 -5 3 7297.47 297.988 1
-2 7 3 7334.43 258.017 2
7 -5 9 5120.63 455.057 4
-5 -2 9 4029.14 499.066 4
-5 -2 12 1596.75 368.753 4
-3 7 -13 160.455 302.592 2
7 -4 -13 -90.3527 228.957 2
7 -4 -10 19064.9 1125.36 2
-3 7 -10 18010.4 1235.99 2
7 -4 -7 3640.67 404.111 2
-3 7 -7 4028.88 265.758 1
-3 7 -7 4756.97 540.556 2
-4 -3 -4 84606.7 1680.01 4
-3 7 -4 79743.1 1492.12 1
-3 7 -4 85126.9 2124.63 2
-3 7 -1 143066 2751.57 2
7 -4 -1 146472 2747.57 4
7 -4 2 189838 3411.07 1
7 -4 8 50646.4 1503.79 4
7 -4 11 6015.52 556.904 4
-4 -3 11 5555.79 683.387 4
-4 7 -14 7290.84 973.786 2
-4 7 -11 52309.3 2268.71 2
7 -3 -11 51555.1 2110.32 2
-4 7 -8 3835.16 529.209 2
7 -3 -8 3295.14 416.03 2
-4 7 -5 40955.5 1418.4 2
-4 7 -5 35106.8 739.827 1
-3 -4 -5 36884.6 1022.09 4
7 -3 -5 34852.5 842.847 3
-4 7 -2 12933.4 578.221 2
7 -3 -2 13221.8 536.053 4
7 -3 1 371494 6424.47 1
7 -3 1 381707 6179.3 4
-3 -4 4 246168 4091.9 3
7 -3 7 110147 2420.42 4
7 -3 10 3495.9 396.604 4
-3 -4 10 4444.91 551.924 4
7 -2 -12 10060 952.487 2
-5 7 -12 10450.8 1042.97 2
7 -2 -9 23605 1240.54 2
-5 7 -9 26209.2 1419.28 2
-5 7 -6 11680.3 777.814 2
7 -2 -6 10621.2 670.4 2
-5 7 -3 19790.8 809.994 2
7 -2 0 497928 8631.43 1
7 -2 0 510999 8379.78 4
-2 -5 0 513166 8632.91 3
-2 -5 3 18562.5 532.981 3
7 -2 3 19275.7 668.611 1
7 -2 6 17637.3 637.162 4
-5 7 9 15109.9 940.307 4
7 -2 9 16204.9 781.808 4
-2 -5 12 5039.74 671.619 4
7 -1 -13 20234.3 1448.7 2
7 -1 -10 43406.8 1870.88 2
-6 7 -10 44507.8 1977.42 2
7 -1 -7 11566 762.962 2
-6 7 -7 11162.3 818.898 2
-1 -6 -4 56484.5 1403.29 4
-6 7 -4 59497.2 1690.88 2
7 -1 -1 122227 2557.19 1
-1 -6 -1 125050 2574.79 3
7 -1 2 81605.6 1826.13 1
-1 -6 2 80526.8 1697.46 3
7 -1 5 20791.4 609.268 4
-6 7 8 12680.8 825.942 4
7 -1 8 13358.7 643.098 4
-1 -6 11 8620.54 801.932 4
-6 7 11 9867.09 860.995 4
7 0 -14 1491.74 537.839 2
7 0 -11 8326.83 850.591 2
7 0 -8 21146.3 1113.74 2
-7 7 -8 20929.8 1195.98 2
-7 7 -5 30263.2 1220.05 2
-7 7 -5 30222.1 619.127 1
7 0 -2 114623 2476.93 1
0 -7 -2 112941 2504.49 3
7 0 1 197223 3807.47 1
0 -7 1 201381 3746.41 3
7 0 7 37485.8 1071.81 4
-7 7 7 35807.5 1408.67 4
-7 7 10 2040.58 392.796 4
7 1 -12 18410.9 1354.1 2
7 1 -12 17158.9 1133.23 1
7 1 -9 33803 1576.59 2
-8 7 -6 128708 2329.56 1
7 1 -6 121363 2968.06 1
1 -8 -3 120844 2720.72 3
7 1 -3 122122 2700.42 1
7 1 0 16024.6 675.617 1
1 -8 0 15104.7 653.697 3
7 1 3 16187.4 713.161 1
-8 7 6 28558 1180.22 4
7 1 9 35254 1182.48 4
-8 7 9 32336 1490.01 4
-8 7 12 1559.4 403.212 4
1 -8 12 1383.82 377.677 4
7 2 -13 1745.64 488.54 2
7 2 -10 5801.85 697.838 2
7 2 -10 6178.32 621.237 1
7 2 -7 6618.05 631.263 2
7 2 -7 7404.92 587.142 1
7 2 -4 9894.82 598.021 1
2 -9 -4 9704.29 614.492 3
-9 7 -4 9757.25 345.74 1
7 2 -1 4541.16 371.096 1
2 -9 -1 4449.21 374.207 3
7 2 2 24316.4 916.596 1
-9 7 5 6868.55 531.801 4
-9 7 8 53555.1 1905.49 4
-9 7 11 1934.44 433.801 4
7 3 -11 458.049 235.837 2
7 3 -11 944.748 271.313 1
7 3 -8 72634.8 2183.74 1
7 3 -8 65171.7 2274.84 2
7 3 -5 40286.2 1369.93 1
3 -10 -5 41430.4 1431.11 3
7 3 -2 39067.9 1256.94 1
7 3 -2 40652.7 1042.47 3
3 -10 -2 39778.2 1305.69 3
7 3 1 43617.9 1350.98 1
-10 7 4 17129.3 814.698 4
-10 7 7 8135.44 663.222 4
-10 7 10 8244.97 780.05 4
7 4 -12 820.016 339.966 2
7 4 -9 5582.02 573.309 1
7 4 -9 5106.39 627.836 2
4 -11 -6 37735.9 1435.94 3
7 4 -6 39126.2 1401.42 1
7 4 -3 118836 2324.23 3
7 4 -3 119158 2762.75 1
4 -11 -3 120266 2832.86 3
7 4 0 7898.77 535.344 1
4 -11 3 68499.8 1412.92 1
7 4 3 64826.7 1869.38 1
-11 7 6 57364.4 1859.63 4
-11 7 9 14400.5 1004.73 4
7 5 -13 18205.9 1498.45 2
7 5 -10 3800.43 501.167 1
7 5 -10 3303.38 565.344 2
7 5 -7 17638.1 1100.38 2
5 -12 -7 18804.2 1015.77 3
7 5 -7 20135.7 1008.21 1
7 5 -4 14418.4 767.922 1
5 -12 -4 13055.3 780.933 3
7 5 -1 13556.5 733.795 1
7 5 2 471.659 191.701 1
-12 7 5 25288.7 1106.35 4
-12 7 8 42654.6 1738 4
-12 7 11 7225.4 796.282 4
7 6 -11 6509.13 833.441 2
7 6 -8 11373.5 932.329 2
7 6 -8 11865 805.846 1
6 -13 -5 31582.8 1320.01 3
7 6 -5 33147.5 1271 1
7 6 -2 38991.2 1353.43 1
7 6 -2 39200.1 1145.24 3
6 -13 -2 38590.2 1400.93 3
7 6 1 25031.4 1057.41 1
-13 7 4 2580.29 342.862 4
-13 7 7 67048.7 2196.37 4
-13 7 10 4433.24 623.677 4
7 7 -12 2632.75 590.855 2
7 7 -9 11056 974.368 2
7 7 -9 9487.85 754.133 1
7 -14 -6 20580 1098.16 3
7 7 -6 19365.3 995.068 1
7 7 -3 17931.2 899.659 1
7 -14 -3 15865.6 903.688 3
7 7 0 29557.8 1198.22 1
-14 7 6 11657.3 800.728 4
-14 7 9 17752.5 1162.22 4
7 8 -10 2828.55 555.892 2
7 8 -7 6494.56 702.839 2
7 8 -7 7522.16 647.254 1
8 -15 -7 8028.61 714.966 3
7 8 -4 43078.3 1537.05 1
8 -15 -4 43092.2 1633.22 3
7 8 -1 17339.1 922.507 1
7 8 2 6022.83 565.252 1
-15 7 5 10865.5 746.894 4
-15 7 8 9610 823.309 4
6 8 -11 3871.29 671.582 2
6 8 -8 26221.5 1215 1
6 8 -8 27837 1489.18 2
8 -14 -8 26119.5 1298.14 3
6 8 -5 2085.17 320.752 1
8 -14 -5 1485.66 294.571 3
6 8 -2 38202.8 1367.74 1
6 8 1 346.548 175.626 1
-14 6 4 31385.1 1218.04 4
-14 6 7 29380.2 1380.26 4
-14 6 10 8759.38 854.18 4
5 8 -12 1680.05 515.719 2
5 8 -9 1653.2 300.223 1
5 8 -9 1164.17 387.16 2
5 8 -6 14027.1 789.278 1
8 -13 -6 13627.4 837.075 3
5 8 -6 13329.4 923.565 2
5 8 -3 40957.8 1368.65 1
5 8 0 144664 3259.52 1
8 -13 3 43624.1 896.601 1
-13 5 3 40766.5 1322.89 4
-13 5 6 72247.4 2194.88 4
-13 5 9 28386.4 1473.67 4
4 8 -13 15629.3 1424.67 2
4 8 -10 13720.9 1143.62 2
4 8 -7 53446.1 1673.41 1
8 -12 -7 52615.5 1773.15 3
4 8 -7 55806.4 2033.13 2
4 8 -4 48561.3 1485.23 1
8 -12 -4 50973.4 1633.45 3
8 -12 -1 9447.44 365.089 2
4 8 -1 7968.95 533.994 1
-12 4 2 126845 2702.52 4
-12 4 5 7996.87 593.408 4
-12 4 8 35351.3 1548.66 4
-12 4 11 339.518 224.155 4
3 8 -11 8471.68 947.241 2
8 -11 -8 41397 1502.97 3
3 8 -8 40256.8 1775.58 2
3 8 -8 40838.3 1407.49 1
3 8 -5 16826.2 771.174 1
8 -11 -5 16454.4 488.556 2
3 8 -5 18645 984.424 2
8 -11 -5 16963.9 852.308 3
3 8 -2 76099.3 1894.29 1
8 -11 -2 72701.1 1380.69 2
-11 3 1 190630 3568.58 4
3 8 1 187018 3888.63 1
-11 3 4 10272 620.356 4
-11 3 7 23673.6 1171.15 4
-11 3 10 10903.7 919.768 4
2 8 -12 568.353 346.698 2
2 8 -9 7135.17 779.555 2
2 8 -6 9998 563.571 1
8 -10 -6 10988.2 496.792 2
8 -10 -6 9851.44 622.919 3
2 8 -6 10339.5 762.045 2
2 8 -3 34281.3 1073.98 1
2 8 0 11178.7 580.503 1
-10 2 0 10447.4 404.186 4
-10 2 3 14653.9 679.114 4
-10 2 6 17535.5 933.688 4
-10 2 9 7254.45 698.383 4
8 -10 12 -70.1234 185.228 4
1 8 -13 486.228 388.96 2
1 8 -10 931.1 386.067 2
8 -9 -7 3220.85 352.504 3
1 8 -7 3325.72 483.247 2
8 -9 -7 3937.76 347.675 2
1 8 -7 3752.39 335.188 1
1 8 -4 73135.1 1716.98 1
1 8 -4 73299.4 2039.78 2
1 8 -1 14569.7 620.082 1
-9 1 -1 15125.9 392.234 4
-9 1 2 223864 4211 4
8 -9 2 224327 3860.25 1
-9 1 5 74420.7 2053.27 4
-9 1 8 10522.6 783.261 4
-9 1 11 4317.37 611.525 4
0 8 -11 18163.9 1351.51 2
8 -8 -8 28771.7 1129.65 2
0 8 -8 28172.9 1435.45 2
0 8 -8 26862 968.856 1
0 8 -5 16956.9 644.855 1
0 8 -5 17595.3 922.896 2
8 -8 -5 17847.5 672.388 2
8 -8 -5 17895.8 766.472 3
0 8 -2 8191.96 414.726 1
-8 0 4 95286.1 2299.87 4
-8 0 7 2546.73 376.817 4
-8 0 10 9385.2 829.829 4
-1 8 -12 1767.56 510.911 2
-1 8 -9 33088.1 1644.94 2
8 -7 -9 32925.9 1349.69 2
-1 8 -6 31105.4 1321.74 2
8 -7 -6 28117.2 978.403 2
8 -7 -6 26145.6 930.8 3
-1 8 -6 27497.4 848.544 1
-1 8 -3 16966.5 759.842 2
-1 8 -3 17920 588.793 1
8 -7 3 119781 2145.39 1
-7 -1 6 125782 3033.78 4
-7 -1 9 33049.2 1512.26 4
-7 -1 12 18083.4 1257.7 4
-2 8 -13 2081.69 582.022 2
-2 8 -10 13681.3 1096.03 2
8 -6 -10 13513.4 919.036 2
8 -6 -7 6198.64 392.663 3
-2 8 -7 7334.63 669.467 2
8 -6 -7 7193.76 532.781 2
-2 8 -7 6120.22 354.931 1
-2 8 -4 39800.4 1334.57 2
-2 8 -4 37294.2 893.471 1
8 -6 -1 108849 2187.24 4
-2 8 -1 99615.8 2119.99 2
8 -6 2 106020 2030.09 1
-6 -2 8 11334.4 795.083 4
-6 -2 11 4257.6 580.537 4
8 -6 11 5083.59 524.102 4
-3 8 -11 2383.55 522.689 2
8 -5 -11 1660.4 361.43 2
-3 8 -8 362.637 260.269 2
8 -5 -8 627.944 222.022 2
-3 8 -5 28173.9 682.157 1
8 -5 -5 28537.8 846.639 3
-3 8 -5 27733.9 1178.01 2
8 -5 -2 434.182 111.408 4
-3 8 -2 425.468 122.919 2
-3 8 1 283732 4667.43 2
8 -5 1 272861 4933.63 1
-5 -3 10 15906.3 1065.69 4
8 -5 10 16970.1 901.58 4
-4 8 -12 592.072 396.857 2
8 -4 -12 839.265 322.355 2
-4 8 -9 46998.6 1977.74 2
8 -4 -9 44378 1718.98 2
-4 8 -6 28669.2 1279.58 2
8 -4 -6 27279.6 763.437 3
8 -4 -6 26097.4 1059.3 2
-4 8 -6 27314.1 652.855 1
-4 8 -3 21194.1 855.594 2
8 -4 0 28255.2 752.128 4
8 -4 0 29264.2 872.643 1
-4 8 0 29378.1 738.611 2
8 -4 3 235011 4231.52 1
8 -4 9 7951.74 547.223 4
-4 -4 12 1874.66 455.149 4
-5 8 -13 4871.88 782.569 2
8 -3 -13 2662.95 521.396 2
8 -3 -10 5989.83 667.906 2
-5 8 -10 6247.41 760.384 2
-5 8 -7 8758.79 328.779 1
8 -3 -7 11227.2 707.866 2
-5 8 -7 9347.12 767.578 2
-3 -5 -4 17633.1 614.894 4
-5 8 -4 17041.6 831.293 2
8 -3 -1 116190 2448.47 1
8 -3 -1 115389 2282.1 4
-5 8 -1 116020 2328.5 2
8 -3 2 80542.9 1756.72 1
-3 -5 2 78802.7 1648.21 3
-3 -5 5 7288.98 224.272 3
8 -3 8 104491 2386.34 4
-3 -5 11 3503.17 532.364 4
8 -2 -14 3685.18 653.35 2
-6 8 -11 6103.83 765.298 2
8 -2 -11 5576.62 685.103 2
8 -2 -8 92065.2 2636.38 2
-6 8 -8 99955.9 2940.09 2
8 -2 -5 15433.4 416.369 3
-6 8 -5 14714.2 835.602 2
8 -2 -2 5291.41 381.725 1
-6 8 -2 4561.81 349.427 2
8 -2 1 111253 2324.79 1
-2 -6 1 108699 2245.79 3
8 -2 4 47407.8 938.245 4
-2 -6 4 44841 1038.21 3
8 -2 7 1566.68 192.462 4
-2 -6 7 1495.72 101.663 3
8 -1 -12 1287.1 423.03 2
8 -1 -9 9628.96 801.61 2
-7 8 -9 9227.86 839.58 2
-7 8 -6 15073 914.209 2
-7 8 -3 129760 2853.18 2
8 -1 -3 129692 2844.63 1
8 -1 0 110299 2362.97 1
-1 -7 0 106953 2320.92 3
-1 -7 3 52249.6 1241.05 3
8 -1 3 51889.2 1390.17 1
8 -1 6 40180 1007.74 4
-7 8 9 340.39 253.579 4
8 -1 9 4.97114 85.7473 4
-1 -7 12 11885.6 1017.18 4
8 0 -13 1029.82 361.982 2
8 0 -10 8880.26 836.729 2
-8 8 -7 2600.98 425.946 2
8 0 -7 2097.01 366.873 2
8 0 -4 99935.7 2430.6 1
8 0 -1 116190 2510.35 1
0 -8 -1 108161 2475.61 3
8 0 2 7818.35 484.703 1
0 -8 2 8491.32 440.333 3
-8 8 8 25985.5 1266.85 4
8 0 8 29386.6 957.273 4
-8 8 11 18443.6 1206.26 4
8 1 -14 2693.13 620.654 2
8 1 -11 1494.05 392.372 2
8 1 -11 1350.13 366.682 1
8 1 -8 6239.25 642.023 2
8 1 -8 6238.8 579.314 1
8 1 -5 15102.4 802.753 1
1 -9 -2 321213 6009.96 3
8 1 -2 317747 5958.29 1
8 1 1 191718 3831.32 1
1 -9 1 188704 3726.37 3
-9 8 7 14745.8 884.09 4
-9 8 10 4191.05 567.797 4
8 2 -12 7870.61 911.157 2
8 2 -9 15736.4 978.973 1
8 2 -9 15491.9 1069.33 2
8 2 -6 20907.2 1010.18 1
2 -10 -3 38985 1344.92 3
8 2 -3 38954.3 947.836 3
8 2 -3 37834.6 1281.83 1
2 -10 0 244209 4785.51 3
8 2 0 251172 4815.22 1
8 2 3 2987.57 336.183 1
-10 8 6 1947.17 329.39 4
-10 8 9 2046.85 410.014 4
8 3 -13 2590.43 592.751 2
8 3 -10 15578.6 1156.44 2
8 3 -10 16670.3 1060.29 1
8 3 -7 2355.55 358.638 1
8 3 -7 1906.72 378.38 2
3 -11 -4 54934.4 1722.59 3
8 3 -4 53505 1121.75 3
8 3 -4 54396.8 1658.25 1
8 3 -1 5796.84 469.684 1
3 -11 -1 4797.79 431.819 3
8 3 2 170830 3635.01 1
-11 8 5 56753.8 1771.72 4
-11 8 8 60380.2 2104.59 4
-11 8 11 12560.3 1032.64 4
8 4 -11 5070.79 606.018 1
8 4 -11 5465.03 765.049 2
8 4 -8 11783.8 937.65 2
8 4 -8 12267.6 832.976 1
4 -12 -5 33051.4 1346.87 3
8 4 -5 34263.6 1310.93 1
8 4 -2 60900.8 1764.29 1
8 4 -2 56349.5 1445.33 3
4 -12 -2 58256.8 1769.08 3
8 4 1 35252.9 1270.49 1
4 -12 4 103135 1987.45 1
-12 8 7 25684.6 1246.44 4
-12 8 10 3787.71 560.648 4
8 5 -12 10149.9 1094.39 2
8 5 -9 1632.2 316.699 1
8 5 -9 1808.23 441.357 2
8 5 -6 10144.5 708.287 1
5 -13 -6 8620.16 690.447 3
8 5 -3 81225.6 2214.97 1
8 5 -3 80530.6 1805.78 3
5 -13 -3 82790.3 2299.6 3
8 5 0 23099.3 1035.52 1
8 5 3 12940.2 782.147 1
-13 8 6 93917.5 2623.27 4
-13 8 9 16466 1115.93 4
8 6 -10 4833.3 563.492 1
8 6 -10 4933.09 709.446 2
8 6 -7 12134 820.028 1
6 -14 -7 11635.8 850.277 3
8 6 -7 11946 921.655 2
8 6 -4 15989.8 882.032 1
6 -14 -4 18178.7 979.07 3
8 6 -1 913.573 246.289 1
8 6 2 1075.34 284.86 1
-14 8 5 48297.8 1669.67 4
-14 8 8 2733.49 455.525 4
8 7 -11 1179.96 418.17 2
7 -15 -8 4024.4 525.107 3
8 7 -8 3555.21 575.959 2
8 7 -8 4038.19 505.398 1
8 7 -5 47015.2 1673.33 1
7 -15 -5 45895.1 1751.09 3
8 7 -2 5518.73 517.55 1
7 -15 -2 5376.29 539.131 3
8 7 1 5955.15 558.929 1
-15 8 7 20797 1169.88 4
-15 8 10 8107.82 840.482 4
8 8 -12 20798.9 1618.11 2
8 8 -9 2234.22 493.36 2
8 8 -9 2437.2 420.223 1
8 -16 -6 4248.95 534.468 3
8 8 -6 4478.01 522.749 1
8 8 -3 20616.2 1044.24 1
8 -16 -3 21304.1 1120.56 3
8 8 0 23166.4 1124.52 1
-16 8 6 6191.62 618.849 4
-16 8 9 4985.75 640.272 4
8 9 -10 1658.26 474.402 2
8 9 -7 11418.4 969.563 2
8 9 -7 11860.4 851.992 1
9 -17 -7 10893.8 890.229 3
9 -17 -4 125495 3352.27 3
8 9 -4 123014 3191.89 1
8 9 -1 10380.8 749.181 1
8 9 2 48052 1783.56 1
-17 8 5 52844.3 1845.54 4
-17 8 8 31161.2 1581.98 4
7 9 -11 1560.43 460.502 2
9 -16 -8 10394.7 854.818 3
7 9 -8 12244.5 1009.52 2
7 9 -8 12803.3 870.927 1
7 9 -5 26856.8 1210.94 1
9 -16 -5 25805.8 1286.03 3
7 9 -2 3365.34 424.855 1
7 9 1 92131.7 2571.46 1
-16 7 4 146424 3425.96 4
-16 7 7 810.688 270.853 4
-16 7 10 4101.74 609.852 4
6 9 -12 2312.24 568.808 2
6 9 -9 4888.23 697.659 2
6 9 -6 24412.3 1323.36 2
6 9 -6 27644.3 1205.72 1
9 -15 -6 25759.7 1267.59 3
6 9 -3 83294.7 2295.74 1
9 -15 -3 82979.2 2406.2 3
6 9 0 72949.7 2123.76 1
9 -15 3 1277.96 123.579 1
-15 6 3 1201.66 237.516 4
-15 6 6 69429.7 2194.23 4
-15 6 9 24451 1404.15 4
5 9 -10 1640.72 469.084 2
5 9 -7 21887.6 1274.02 2
9 -14 -7 23286.2 1177.69 3
5 9 -7 24635.6 1122.05 1
5 9 -4 10965.6 679.987 1
9 -14 -4 10820.1 753.897 3
9 -14 -1 107538 2073.09 2
5 9 -1 104839 2611.32 1
-14 5 2 13332.7 651.719 4
-14 5 5 4914.52 492.696 4
-14 5 8 2696.26 444.672 4
4 9 -11 3070.72 621.369 2
4 9 -8 10920.6 710.134 1
4 9 -8 12192.2 965.94 2
9 -13 -8 11367.3 790.965 3
4 9 -5 11969.2 684.747 1
4 9 -5 13671.3 880.989 2
9 -13 -5 12208 779.159 3
9 -13 -2 3673.45 165.583 2
4 9 -2 3926.51 393.354 1
-13 4 1 82124.5 1863.44 4
4 9 1 80087.3 2180.05 1
-13 4 4 8183.78 576.055 4
-13 4 7 26285.9 1271.45 4
-13 4 10 3420.04 542.004 4
3 9 -12 3410.92 666.237 2
3 9 -9 11317.9 972.404 2
3 9 -6 5431.21 455.413 1
3 9 -6 5767.23 616.327 2
9 -12 -6 5232.38 503.945 3
9 -12 -6 4669.33 261.081 2
3 9 -3 3306.46 338.283 1
-12 3 0 5141.16 298.178 4
3 9 0 4749.2 426.825 1
-12 3 3 18153.7 790.005 4
9 -12 3 14750.8 362.762 1
9 -12 3 15461 370.469 1
-12 3 6 42567.5 1568.21 4
-12 3 9 2254.58 426.547 4
2 9 -13 2074 587.32 2
2 9 -10 1001.53 401.608 2
9 -11 -7 33861 1030.84 2
2 9 -7 31276.8 1133.08 1
2 9 -7 30429.7 1461.01 2
9 -11 -7 31850.5 1259.5 3
9 -11 -4 54862.6 1131.34 2
2 9 -4 53529.5 1737.05 2
2 9 -4 52734.5 1486.66 1
2 9 -1 66808.7 1743.97 1
-11 2 2 20206 766.311 4
-11 2 5 57431.1 1772.96 4
-11 2 8 3741.83 505.033 4
-11 2 11 3153.54 540.646 4
1 9 -11 3907.43 657.372 2
1 9 -8 77.1657 105.384 1
9 -10 -8 458.796 172.679 3
9 -10 -8 280.975 136.672 2
1 9 -8 325.34 253.029 2
9 -10 -5 37469.7 979.761 2
9 -10 -5 36309 1264.15 3
1 9 -5 38600.4 1447.58 2
1 9 -5 35246 1100.72 1
1 9 -2 25116.9 872.925 1
-10 1 1 105963 2186.53 4
-10 1 4 61993.6 1754.64 4
-10 1 7 21924.4 1113.8 4
-10 1 10 1315.75 338.484 4
0 9 -12 3635.17 657.214 2
0 9 -9 6428.32 741.977 2
9 -9 -9 5999.21 526.325 2
0 9 -6 8476.62 471.597 1
0 9 -6 9232.05 723.826 2
9 -9 -6 9241.09 572.466 3
9 -9 -6 8376.05 479.314 2
0 9 -3 6559.7 490.211 2
0 9 -3 6835.82 392.484 1
-9 0 0 55532.5 1217.76 4
-9 0 3 4841.24 388.85 4
9 -9 3 5025.5 204.541 1
-9 0 6 20183.7 1007.31 4
-9 0 9 4568.11 568.338 4
-1 9 -13 1745.48 548.199 2
-1 9 -10 4559.61 642.158 2
9 -8 -10 4139.97 488.662 2
-1 9 -7 14943.6 992.569 2
9 -8 -7 14443.2 734.897 2
-1 9 -7 16815.8 648.102 1
9 -8 -7 13971.4 690.211 3
-1 9 -4 4206.8 426.872 2
-1 9 -4 3821.33 272.075 1
9 -8 2 311086 5342.33 1
-8 -1 8 6615.07 647.337 4
-8 -1 11 1452.82 400.255 4
-2 9 -11 1881.1 474.27 2
9 -7 -11 1647.62 361.326 2
-2 9 -8 51942.4 2021.29 2
9 -7 -8 47123.5 1608.38 2
-2 9 -5 5349.94 513.638 2
-2 9 -5 6290.8 313.084 1
9 -7 -5 6057.24 405.601 3
-2 9 -2 24977.7 875.348 2
9 -7 1 4586.5 289.107 1
-2 9 4 8967.51 335.667 2
-7 -2 7 7109.87 614.234 4
-7 -2 10 6198.75 689.625 4
9 -7 10 6338.5 544.893 4
-3 9 -12 1661.88 490.154 2
-3 9 -9 3154.51 523.146 2
9 -6 -9 3507.4 449.26 2
-3 9 -6 3089.73 199.671 1
-3 9 -6 3218.23 428.735 2
9 -6 -6 3134.49 338.945 2
9 -6 -6 2487.05 244.779 3
-3 9 -3 5921.36 462.911 2
-6 -3 -3 4346.21 208.784 4
-3 9 0 147130 2700.41 2
9 -6 0 140325 2854.51 1
9 -6 0 146655 2796.14 4
9 -6 3 54405.5 1246.79 1
-6 -3 9 14032.3 965.205 4
9 -6 9 14204.9 764.129 4
-6 -3 12 14227.4 1117.23 4
-4 9 -13 4132.58 714.485 2
9 -5 -10 6813.02 670.658 2
-4 9 -10 6499.85 760.403 2
9 -5 -7 22200.1 1008.06 2
-4 9 -7 20936.4 580.835 1
-4 9 -7 23854.5 1251.49 2
-4 9 -4 40332.3 1372.88 2
-5 -4 -4 38458.8 946.238 4
-4 9 -1 194103 3683.84 2
9 -5 -1 202225 3698.63 4
9 -5 2 109425 2230.67 1
9 -5 8 684.722 156.488 4
-5 -4 11 7235.16 803.684 4
-5 9 -11 275.717 281.877 2
9 -4 -11 634.52 257.471 2
9 -4 -8 17409.5 960.446 2
-5 9 -8 18572.8 1139.12 2
-5 9 -5 1447.32 311.302 2
-4 -5 -5 1062.52 149.993 4
-5 9 -2 35515.7 1092.49 2
9 -4 1 21446.8 744.444 1
9 -4 1 21615.5 576.535 4
9 -4 4 7845.33 420.041 1
9 -4 7 8226.93 453.274 4
-4 -5 10 5924.5 650.784 4
-6 9 -12 2561.84 581.241 2
9 -3 -12 2545.96 503.042 2
9 -3 -9 30140.8 1415.77 2
-6 9 -9 29017.4 1536.99 2
-6 9 -6 54420.9 1865.32 2
9 -3 -6 54528.5 1121.6 3
-6 9 -3 555.804 175.97 2
9 -3 0 72935.1 1492.33 4
9 -3 0 71193.9 1717.51 1
9 -3 3 65372.5 1562.16 1
-3 -6 3 62421.7 1395.09 3
9 -3 6 8498.73 398.819 4
9 -3 9 1902.23 258.18 4
-3 -6 12 3669.74 597.965 4
9 -2 -13 84.7339 269.374 2
9 -2 -10 7960.97 769.327 2
-7 9 -10 6976.42 796.637 2
9 -2 -7 80554.9 2360.89 2
-7 9 -7 83206.6 2550.61 2
-7 9 -4 33364.3 1240.71 2
-2 -7 -1 32599.1 1074.85 3
9 -2 -1 32238.4 1066.78 1
9 -2 2 2359.79 259.947 1
-2 -7 2 2117.07 215.089 3
9 -2 5 13433.1 410.993 4
-2 -7 5 13576.9 466.08 3
9 -2 8 485.194 129.838 4
9 -1 -14 2247.21 554.733 2
9 -1 -11 4034.46 597.624 2
9 -1 -8 9783.96 764.653 2
-8 9 -8 11045.5 885.012 2
-8 9 -5 71357.3 2090.75 2
9 -1 -5 73005.1 2013.97 1
9 -1 -5 67774 1231.9 3
-1 -8 -2 222767 4434.7 3
9 -1 -2 225720 4432.64 1
9 -1 1 13962.9 652.721 1
-1 -8 1 14943.5 631.497 3
-1 -8 4 70394.8 1604.22 3
9 -1 4 72814.3 1842.18 1
9 -1 7 4455.87 293.785 4
9 0 -12 13608.8 1164.08 2
9 0 -12 14147.6 1079.06 1
9 0 -9 5059 605.616 2
9 0 -9 3790.42 508.549 1
9 0 -6 20200.5 1014.96 1
0 -9 -3 4674.26 441.457 3
9 0 -3 4903.71 433.77 1
9 0 0 57061.3 1592.77 1
0 -9 0 56233.7 1535.43 3
9 0 3 5907.94 445.577 1
0 -9 3 5975.92 379.29 3
9 1 -13 5062.79 777.839 2
9 1 -10 6256.79 715.169 2
9 1 -10 6182.78 659.693 1
9 1 -7 2158.92 354.496 1
1 -10 -4 1155.69 259.245 3
9 1 -4 910.497 237.402 1
9 1 -4 934.294 100.932 3
9 1 -1 29518.6 1080.66 1
1 -10 -1 28995.5 1075.64 3
1 -10 2 10107.9 542.671 3
9 1 2 10703.2 617.094 1
9 2 -11 4702.24 608.408 1
9 2 -11 4378.71 647.813 2
9 2 -8 6303.38 612.219 1
9 2 -8 4182.87 564.141 2
9 2 -5 8071.97 602.627 1
2 -11 -5 6110.3 553.136 3
9 2 -2 42079.2 1406.67 1
2 -11 -2 42900.9 1421.63 3
9 2 1 40476.1 1355.3 1
2 -11 1 41011.5 1302.12 3
9 2 4 158912 3523.9 1
9 3 -12 25382.3 1693.36 2
9 3 -9 3806.85 507.521 1
9 3 -9 3336.27 536.016 2
3 -12 -6 5118.29 529.165 3
9 3 -6 5164.2 519.558 1
9 3 -3 149924 3438.64 1
3 -12 -3 155510 3522.06 3
9 3 -3 153148 2941.8 3
9 3 0 52483.8 1624.92 1
3 -12 0 51195.6 1588.42 3
9 3 3 12126.2 741.218 1
-12 9 9 36956.7 1694.11 4
9 4 -13 9594.15 1092.11 2
9 4 -10 2635.24 438.82 1
9 4 -10 2268.66 492.539 2
9 4 -7 3223.31 441.315 1
9 4 -4 42508.7 1510.83 1
4 -13 -4 42171.7 1567.27 3
9 4 -4 42921.5 1040.66 3
9 4 -1 13971.5 791.334 1
4 -13 -1 14749.5 813.523 3
9 4 2 23890.7 1052.74 1
-13 9 8 3611.12 514.385 4
9 5 -11 3340.53 630.257 2
9 5 -8 6335.8 702.939 2
9 5 -8 6266.85 620.693 1
5 -14 -5 23194.7 1177.31 3
9 5 -5 25957.7 1175.93 1
9 5 -2 75311.6 2160.37 1
5 -14 -2 76058.5 2215.72 3
9 5 1 66479 1987.75 1
-14 9 7 4639.86 562.075 4
-14 9 10 5685.55 708.248 4
9 6 -12 1301.89 464.222 2
9 6 -9 6779.67 786.028 2
9 6 -9 6982.9 684.792 1
9 6 -6 22573.5 1147.21 1
6 -15 -6 25187.4 1275.59 3
6 -15 -3 52183.4 1833.97 3
9 6 -3 54574.9 1786.52 1
9 6 0 18307.5 969.551 1
9 6 3 2549.68 426.909 1
-15 9 9 4809.1 626.489 4
9 7 -10 2999.54 571.777 2
9 7 -7 9422.6 763.065 1
7 -16 -7 9388.88 797.004 3
9 7 -4 168776 3904.32 1
7 -16 -4 163518 4016.55 3
9 7 -1 60792 1988.16 1
9 7 2 1019.07 256.014 1
-16 9 8 3856.89 543.901 4
9 8 -11 224.621 302.022 2
9 8 -8 78.0542 206.095 1
9 8 -8 330.514 326.046 2
8 -17 -8 -238.834 252.965 3
9 8 -5 505.465 214.438 1
8 -17 -5 1377.44 351.949 3
8 -17 -2 30336.2 1383.11 3
9 8 -2 30311.4 1354.09 1
9 8 1 15642.4 956.276 1
-17 9 7 19126.5 1153.97 4
9 9 -9 343.941 232.035 1
9 9 -9 550.951 290.037 2
9 9 -6 6445.13 641.684 1
9 -18 -6 8283.31 790.241 3
9 9 -3 65272 2158.05 1
9 -18 -3 62404.4 2195.67 3
9 9 0 30315.7 1382.93 1
-18 9 9 4708.31 658.459 4
9 10 -10 6910.68 890.978 2
9 10 -7 3342.69 497.158 1
9 10 -7 2741.02 542.825 2
10 -19 -7 3902.1 566.374 3
10 -19 -4 24761.9 1360.74 3
9 10 -4 26010.2 1305.43 1
9 10 -1 70495.9 2292.96 1
9 10 2 63003.7 2193.22 1
8 10 -11 7287.75 959.448 2
10 -18 -8 7229.41 759.421 3
8 10 -8 6398.47 767.525 2
8 10 -8 7164.63 684.954 1
8 10 -5 45112 1728.64 1
10 -18 -5 46168.8 1879.79 3
8 10 -2 30341.8 1354.85 1
8 10 1 24888.2 1241.27 1
-18 8 7 22917.8 1290.3 4
10 -17 -9 2553.09 461.302 3
7 10 -9 2472.33 530.543 2
7 10 -6 32451.6 1408.69 1
10 -17 -6 32321.3 1517.26 3
7 10 -3 25043.8 1189.12 1
10 -17 -3 22741.1 1196.56 3
7 10 0 10824.6 762.491 1
-17 7 6 11511.4 846.979 4
-17 7 9 6775.06 753.941 4
6 10 -10 14357.2 1236.23 2
6 10 -7 2260.83 351.179 1
6 10 -7 2178.26 462.58 2
10 -16 -7 2367.83 414.208 3
6 10 -4 26871.6 1192.11 1
10 -16 -4 24880.9 1241.35 3
6 10 -1 27247.4 1188.3 1
-16 6 5 25345.8 1175.23 4
-16 6 8 7704.72 757.125 4
5 10 -11 8701.25 1000.77 2
10 -15 -8 2536.51 418.313 3
5 10 -8 2292.98 467.698 2
5 10 -8 2416.91 374.516 1
5 10 -5 10560.9 708.644 1
10 -15 -5 12727.6 851.974 3
5 10 -2 48641.9 1608.18 1
5 10 1 2466.32 374.864 1
-15 5 4 8720.91 622.018 4
-15 5 7 36339.9 1581.31 4
-15 5 10 5675.42 695.621 4
4 10 -12 17975 1490.75 2
4 10 -9 11853.9 1027.13 2
4 10 -6 44822.8 1795.21 2
4 10 -6 45111.2 1513.57 1
10 -14 -6 43232.4 1640.58 3
4 10 -3 28207.7 1126.29 1
4 10 0 15822.3 841.168 1
-14 4 3 16553.3 791.462 4
10 -14 3 16309.6 449.495 1
-14 4 6 26053.1 1222.65 4
-14 4 9 9532.26 853.153 4
3 10 -10 5295.18 749.684 2
3 10 -7 56025 1699.48 1
10 -13 -7 53802.5 1844.76 3
3 10 -7 55202.7 2090.01 2
3 10 -4 26223.1 1043.08 1
3 10 -1 102075 2478.76 1
-13 3 2 10066.3 546.008 4
-13 3 5 26508.1 1153.81 4
-13 3 8 22384.1 1238.55 4
2 10 -11 2710.84 577.719 2
2 10 -8 16907 1145.81 2
10 -12 -8 17267.3 931.515 3
10 -12 -5 42022.7 991.635 2
2 10 -5 43498.3 1627.88 2
2 10 -5 43768.5 1343.68 1
10 -12 -5 42880.5 1496.1 3
2 10 -2 11908.7 628.053 1
10 -12 -2 10648.4 412.435 2
-12 2 1 159327 3113.2 4
-12 2 4 10575.3 644.457 4
-12 2 7 16268.1 974.133 4
-12 2 10 6846.53 750.878 4
1 10 -12 4491.85 788.451 2
1 10 -9 2335.86 475.607 2
10 -11 -6 14883.5 602.92 2
1 10 -6 14149.2 929.384 2
1 10 -6 14978.4 685.823 1
10 -11 -6 13215.4 762.49 3
1 10 -3 62873.8 1818.4 2
1 10 -3 60895 1600.95 1
-11 1 0 89647.5 1829.42 4
-11 1 3 329.03 137.557 4
10 -11 3 404.246 60.57 1
-11 1 6 40128.3 1511.93 4
-11 1 9 2024.76 397.706 4
0 10 -13 2805.53 670.971 2
0 10 -10 11021.2 1026.6 2
10 -10 -7 17351.1 762.491 2
0 10 -7 15442.2 1030.77 2
0 10 -7 19275.9 762.319 1
10 -10 -7 17057.3 841.028 3
0 10 -4 20910.5 974.756 2
0 10 -4 18944.1 742.299 1
-10 0 -1 262310 4445.83 4
0 10 -1 262946 4918.84 1
-10 0 2 56777.1 1479.44 4
10 -10 2 56845.5 1273.68 1
-10 0 5 40834.2 1431.8 4
-10 0 8 10072 824.028 4
-10 0 11 2914.01 514.249 4
-1 10 -11 20255.8 1460.54 2
-1 10 -8 50901.2 2040.17 2
10 -9 -8 49538.7 1581.86 2
10 -9 -8 49773.5 1508.36 3
-1 10 -5 7225.25 611.039 2
-1 10 -5 7358.13 406.212 1
10 -9 -5 7222.7 496.808 3
-1 10 -2 10980.4 576.748 2
-1 10 -2 9737.65 486.723 1
-1 10 4 1031.1 123.882 2
-9 -1 7 2241.74 375.442 4
-9 -1 10 7348.68 753.548 4
-2 10 -12 1442.18 465.572 2
-2 10 -9 1850.28 458.903 2
10 -8 -9 1775.54 308.908 2
-2 10 -6 1994.86 188.742 1
-2 10 -6 1472.26 325.91 2
10 -8 -6 2194.69 280.243 2
10 -8 -6 2220.84 265.835 3
-2 10 -3 2785.81 331.326 2
-2 10 -3 2630.26 220.942 1
-2 10 0 248001 4459.93 2
10 -8 3 38395.7 917.353 1
-2 10 3 36368.7 792.998 2
-8 -2 9 15477.4 1036.01 4
-3 10 -13 14354.6 1329.14 2
10 -7 -10 6700.95 632.705 2
-3 10 -10 6196.74 790.892 2
-3 10 -7 7432.26 703.643 2
10 -7 -7 7469.18 548.648 2
10 -7 -7 7985.02 463.222 3
-3 10 -4 15873.6 843.785 2
-7 -3 -4 16359.6 470.234 4
-3 10 -4 16378.3 505.156 1
-3 10 -1 45528.4 1205.13 2
10 -7 2 37946.1 1008.96 1
-3 10 5 40698.1 936.372 2
-7 -3 8 67809.6 2225.04 4
-7 -3 11 1103.6 353.665 4
-4 10 -11 2239.6 496.483 2
10 -6 -11 1671.39 377.376 2
-4 10 -8 1628.77 409.106 2
10 -6 -8 1699.49 306.159 2
-6 -4 -5 44811.9 1096.74 4
-4 10 -5 47223.5 1646.03 2
-4 10 -5 45351.7 890.119 1
-4 10 -2 66630.1 1686.59 2
-4 10 1 62470.8 1218 2
10 -6 1 61296.3 1496.84 1
10 -6 4 27061.4 804.039 1
-6 -4 10 2536.36 443.316 4
10 -5 -12 11956.2 1002.22 2
-5 10 -12 10780.2 1096.4 2
10 -5 -9 6708.81 629.539 2
-5 10 -9 6008.49 706.801 2
-5 10 -6 5557.63 574.57 2
10 -5 -6 5455.26 319.676 3
-5 10 -3 57764.4 1647.09 2
10 -5 0 18186.7 606.887 4
10 -5 0 17569.1 713.228 1
-5 10 0 18576.7 578.797 2
10 -5 3 77664.1 1764.74 1
10 -5 9 12870.9 678.869 4
10 -4 -13 10360.2 1002.74 2
-6 10 -13 11009.3 1167.68 2
10 -4 -10 23021.7 1305.26 2
-6 10 -10 26115.6 1532.79 2
10 -4 -7 63399.9 1991.63 2
-6 10 -7 66692.9 2235.62 2
-4 -6 -4 39143.8 1047.38 4
-6 10 -4 39989.8 1388.94 2
-6 10 -1 164790 3136.97 2
10 -4 -1 155957 3285.33 1
10 -4 -1 157969 3072.71 4
10 -4 2 33819.2 1030.02 1
10 -4 2 34085.3 740.858 4
10 -4 8 20327.4 776.717 4
-4 -6 11 302.376 259.402 4
10 -3 -11 384.584 250.332 2
-7 10 -11 804.964 363.624 2
10 -3 -8 30329.2 1371.33 2
-7 10 -8 31624.3 1545.5 2
-7 10 -5 8324.11 636.44 2
10 -3 -2 75178.8 1960.8 1
-7 10 -2 75560.1 1850.48 2
10 -3 1 109795 2415.54 1
-3 -7 1 108513 2348.55 3
-3 -7 4 12100.1 464.803 3
10 -3 4 12504 607.375 1
10 -3 7 23073.7 738.265 4
10 -2 -12 -464.773 398.988 2
10 -2 -9 5719.62 612.822 2
-8 10 -9 6956.73 759.992 2
-8 10 -6 16534.7 971.914 2
10 -2 -3 16055.7 811.366 1
-8 10 -3 15272.3 750.387 2
10 -2 0 11036.2 590.498 1
-2 -8 0 10746.4 576.219 3
10 -2 3 35329.6 1128.69 1
-2 -8 3 33526.6 985.171 3
-2 -8 6 10924.2 413.691 3
10 -2 6 10400.3 378.218 4
10 -1 -13 4373.23 718.652 2
10 -1 -10 1278.02 345.764 1
10 -1 -10 1350.11 367.613 2
-9 10 -7 21097.3 1183.25 2
10 -1 -7 21736.4 1105.36 1
10 -1 -4 65489.2 1919.68 1
-1 -9 -1 104219 2458.3 3
10 -1 -1 105456 2474.84 1
10 -1 2 25472.1 980.046 1
-1 -9 2 25121.6 879.668 3
-1 -9 5 34925.1 996.924 3
10 0 -14 803.113 415.829 2
10 0 -11 3453.33 529.29 1
10 0 -11 4126.43 645.311 2
10 0 -8 8387.68 754.837 2
10 0 -8 10721 799.683 1
10 0 -5 37996.3 754.4 3
10 0 -5 43452.8 1516.83 1
0 -10 -2 55230.4 1691.85 3
10 0 -2 59652.7 1724.55 1
10 0 1 263115 5023.5 1
0 -10 1 249023 4888.61 3
0 -10 4 20175.7 770.663 3
10 0 4 20929 913.204 1
10 1 -12 4829.61 658.443 1
10 1 -12 4310.45 690.35 2
10 1 -9 2137.08 400.125 1
10 1 -9 1396.55 355.719 2
10 1 -6 5776.22 556.73 1
1 -11 -3 35387.5 1333.23 3
10 1 -3 36798 1323.02 1
10 1 0 78222.8 2080.71 1
1 -11 0 78403.6 2048.48 3
10 1 3 74838.7 2035.15 1
10 2 -13 13362.7 1252.12 2
10 2 -10 4491.62 578.59 1
10 2 -10 3884.68 616.272 2
10 2 -7 35118.5 1479.67 1
2 -12 -4 82229.2 2337.28 3
10 2 -4 82647.6 1685.63 3
10 2 -4 81397.2 2276.86 1
10 2 -1 93636.3 2386.95 1
2 -12 -1 86948 2313.94 3
10 2 2 32729.9 1217.54 1
2 -12 2 29227.7 1089.06 3
10 3 -11 5358.37 653.05 1
10 3 -11 4836.75 713.964 2
10 3 -8 50695.1 2055.02 2
10 3 -8 52063.2 1936.4 1
10 3 -5 2815.68 399.25 1
3 -13 -5 2266.09 388.607 3
3 -13 -2 2764.37 368.249 3
10 3 -2 2329.63 347.587 1
10 3 1 22377.9 1026.65 1
3 -13 1 19469.1 911.878 3
10 3 4 12415 783.161 1
10 4 -12 15760.9 1353.25 2
10 4 -9 6628.47 680.773 1
10 4 -9 7105.23 787.202 2
10 4 -6 2955.29 415.536 1
4 -14 -6 3380.05 463.512 3
10 4 -3 66864.6 2003.31 1
10 4 -3 61890 1545.39 3
4 -14 -3 61563 1981.41 3
10 4 0 32682.3 1304.06 1
4 -14 0 29630 1228.95 3
10 4 3 21999.5 1071.36 1
10 5 -10 2205.72 432.053 1
10 5 -10 2639.33 559.493 2
10 5 -7 17945.9 1066.68 1
5 -15 -7 16928.3 1081.52 3
10 5 -4 57894.5 1892.28 1
5 -15 -4 50878.8 1866.09 3
10 5 -1 35553.2 1404.07 1
5 -15 -1 33192.4 1375.8 3
10 5 2 25811.1 1192 1
10 6 -11 2634.83 577.21 2
10 6 -8 1985.98 388.132 1
10 6 -8 1384.79 392.48 2
6 -16 -5 57752.9 2075.03 3
10 6 -5 61092.3 2038.57 1
10 6 -2 2260.42 370.389 1
6 -16 -2 2612.18 419.277 3
10 6 1 37357.4 1483.94 1
10 7 -9 8878.95 818.482 1
10 7 -9 9622.62 960.357 2
10 7 -6 2391.68 398.942 1
7 -17 -6 2077.07 417.815 3
10 7 -3 174055 4134.68 1
7 -17 -3 179322 4282.12 3
10 7 0 46220.5 1716.96 1
10 7 3 17387.1 1029.08 1
10 8 -10 283.127 297.783 2
10 8 -7 8227.32 762.74 1
8 -18 -7 8558.52 823.786 3
10 8 -4 15337.8 979.968 1
8 -18 -4 13978 989.885 3
10 8 -1 26034.2 1268.3 1
8 -18 -1 23228.8 1234.92 3
10 8 2 67132.7 2244.88 1
10 9 -11 2253.67 559.101 2
10 9 -8 257.009 222.626 1
10 9 -8 772.054 373.672 2
9 -19 -8 616.411 285.626 3
10 9 -5 23532 1253.69 1
9 -19 -5 21047.7 1276.79 3
9 -19 -2 35676.8 1608.49 3
10 9 -2 37061.3 1588.92 1
10 9 1 18146 1093.63 1
10 10 -9 7011.19 890.653 2
10 10 -6 3900.31 537.445 1
10 -20 -6 4610.09 625.38 3
10 10 -3 51820.8 1982.53 1
10 -20 -3 47276.2 1978.12 3
10 10 0 39021.8 1691.76 1
10 11 -10 13676.1 1277.02 2
11 -21 -7 2182.27 496.51 3
10 11 -7 2068.52 400.997 1
10 11 -7 2152.85 502.129 2
10 11 -4 29272.7 1487.48 1
11 -21 -4 27950.6 1546.88 3
10 11 -1 11754.1 896.195 1
10 11 2 3204.41 513.848 1
9 11 -8 344.37 241.784 1
11 -20 -8 400.298 286.09 3
9 11 -8 -266.033 303.665 2
9 11 -5 19155.6 1144.28 1
11 -20 -5 18101.7 1200.89 3
9 11 -2 3830.55 500.751 1
11 -20 -2 2738.44 483.937 3
9 11 1 3971.78 536.173 1
8 11 -9 13986.8 1198.49 2
11 -19 -9 14236.4 1098.13 3
8 11 -6 11752.3 869.506 1
11 -19 -6 11937 952.159 3
8 11 -3 20018.4 1113.74 1
11 -19 -3 19943.8 1188.54 3
8 11 0 7317.88 680.333 1
-19 8 6 527.783 256.571 4
-19 8 9 2200.48 464.193 4
7 11 -10 5965.62 815.745 2
7 11 -7 45419.9 2044.48 2
7 11 -7 50912.7 1874.37 1
11 -18 -7 49164.9 2015.24 3
7 11 -4 14778.3 933.305 1
11 -18 -4 14306.7 991.765 3
7 11 -1 29775.7 1330.45 1
-18 7 5 69873.4 2224.96 4
-18 7 8 28626.2 1533.61 4
6 11 -11 2496.81 578.505 2
11 -17 -8 9229.71 821.153 3
6 11 -8 8555.54 860.855 2
6 11 -5 25449 1201.2 1
11 -17 -5 26935.3 1356.66 3
6 11 -2 73425.6 2191.74 1
6 11 1 3870.5 464.94 1
-17 6 4 15144 867.254 4
-17 6 7 3066.8 464.876 4
5 11 -12 2353.02 573.11 2
5 11 -9 3250.8 595.414 2
11 -16 -9 3554.3 502.3 3
11 -16 -6 36663.9 1557.83 3
5 11 -6 33078.3 1574.87 2
5 11 -6 34513.8 1390.61 1
5 11 -3 2175.58 342.532 1
5 11 0 60941.6 1932.28 1
-16 5 3 1377.14 259.97 4
-16 5 6 49681.7 1825.31 4
-16 5 9 9035.24 853.733 4
4 11 -10 6264.78 817.584 2
11 -15 -7 10260.4 793.207 3
4 11 -7 10401.4 881.138 2
4 11 -7 10124.2 695.206 1
4 11 -4 17730.5 910.818 1
4 11 -1 64380.8 1921.15 1
-15 4 2 22641.7 895.286 4
-15 4 5 38627.6 1478.5 4
-15 4 8 6915.11 699.571 4
3 11 -11 4992.48 757.585 2
11 -14 -8 3148.08 442.383 3
3 11 -8 4156.63 597.304 2
3 11 -5 28319.5 1348.48 2
3 11 -5 27413.1 1127.35 1
11 -14 -5 32057.9 1332.04 3
11 -14 -2 52750.4 1194.61 2
3 11 -2 56985.8 1673.44 1
-14 3 1 5079.79 353.527 4
-14 3 4 14734.8 802.928 4
-14 3 7 26272.5 1304.58 4
-14 3 10 3706.34 578.441 4
2 11 -12 2011.13 547.75 2
2 11 -9 18022.5 1272.62 2
2 11 -6 44266.8 1772.81 2
2 11 -6 48433.2 1487.76 1
11 -13 -6 48159.3 1675.87 3
2 11 -3 7499.29 520.253 1
2 11 0 109039 2662.25 1
-13 2 0 112019 2225.77 4
-13 2 3 11046.4 643.37 4
11 -13 3 12479.9 385.656 1
-13 2 6 39682.8 1545.27 4
-13 2 9 4648.58 602.635 4
1 11 -10 2076.82 486.035 2
1 11 -7 27981.9 1433.6 2
11 -12 -7 26824.2 1170.06 3
1 11 -7 27770.9 1026.36 1
1 11 -4 9763.13 689.727 2
1 11 -4 10902.2 588.733 1
-12 1 -1 5222.99 239.28 4
1 11 -1 4078.46 376.362 1
-12 1 2 12196.1 605.838 4
11 -12 2 12759.3 488.75 1
-12 1 5 6043.2 524.015 4
-12 1 8 16633.9 1056.05 4
-12 1 11 13785.3 1110.91 4
0 11 -11 2462.06 559.494 2
11 -11 -8 4347.75 436.136 3
0 11 -8 2999.88 498.921 2
0 11 -5 4307.16 499.609 2
0 11 -5 4704.65 368.006 1
0 11 -2 14364.1 723.689 2
0 11 -2 13549.6 645.849 1
-11 0 1 7806.41 423.434 4
-11 0 4 17677.7 849.968 4
-11 0 7 772.978 231.543 4
-11 0 10 370.307 293.484 4
-1 11 -12 9321.92 1076.46 2
-1 11 -9 7605.26 817.302 2
-1 11 -6 6208.71 617.59 2
11 -10 -6 7276.57 459.253 2
-1 11 -6 7779.84 434.083 1
11 -10 -6 6588.85 509.686 3
-1 11 -3 75150.6 2017.34 2
-1 11 -3 74516 1763.52 1
11 -10 3 35839.1 874.527 1
-10 -1 6 6444.43 570.536 4
-10 -1 9 2224.23 408.628 4
-2 11 -13 7198.76 962.982 2
-2 11 -10 13199.7 1131.98 2
-2 11 -7 16779.4 1083.93 2
11 -9 -7 18004 833.78 2
11 -9 -7 18023.4 813.281 3
-2 11 -4 157781 3569.65 2
-2 11 -4 157043 3009.05 1
-2 11 -1 41537.6 1185.45 2
11 -9 2 40334.2 1051.57 1
-9 -2 8 4907.92 574.029 4
-9 -2 11 5149.98 679.816 4
-3 11 -11 12943.5 1161.6 2
-3 11 -8 66435 2377.13 2
11 -8 -8 58523.4 1859.86 2
-3 11 -5 55401.7 1216.67 1
-3 11 -5 53799.2 1830.7 2
-3 11 -2 169259 3466.22 2
-3 11 1 5452.21 264.703 2
11 -8 1 5872.82 370.483 1
11 -8 4 55648.3 1259.38 1
-8 -3 10 15850.3 1114.45 4
-4 11 -12 2376.45 540.445 2
-4 11 -9 12330.5 1025.4 2
11 -7 -9 13631.3 881.595 2
-4 11 -6 55394.8 1944.54 2
11 -7 -6 55942.2 1456.17 3
-4 11 -6 53529 1062.85 1
-4 11 -3 65522.3 1821.23 2
-4 11 0 7653.48 372.353 2
11 -7 0 8486.54 433.618 4
11 -7 0 7449.91 452.613 1
11 -7 3 121152 2455.9 1
-7 -4 9 4906.72 593.006 4
-5 11 -13 3727.93 730.029 2
-5 11 -10 23594.3 1480.13 2
11 -6 -10 22137.2 1234.28 2
-5 11 -7 4335.78 548.262 2
11 -6 -7 2966.74 381.04 2
11 -6 -7 3254.23 263.2 3
-6 -5 -4 26704.9 757.105 4
-5 11 -4 30488.5 1199.45 2
-5 11 -1 19074 713.484 2
11 -6 -1 19191 797.429 1
11 -6 2 67483.9 1632.08 1
11 -6 8 19770.8 800.861 4
-6 -5 11 6105.78 715.158 4
-6 11 -11 35.3906 320.93 2
11 -5 -11 213.591 219.85 2
11 -5 -8 30488.1 1359.84 2
-6 11 -8 36296.6 1661.34 2
-5 -6 -5 29622.9 894.702 4
-6 11 -5 32222.5 1328.85 2
11 -5 -2 20312.7 885.627 1
-6 11 -2 21254.8 837.522 2
11 -5 1 289009 5450.3 1
11 -5 1 300309 5129.44 4
11 -5 4 33412.9 1033.8 1
11 -5 7 6863.96 388.857 4
-7 11 -12 3188.16 655.755 2
11 -4 -12 1940.59 442.962 2
11 -4 -9 29328.7 1409.86 2
-7 11 -9 29685.9 1594.36 2
11 -4 -6 39220.3 966.111 3
-7 11 -6 41178 1623.67 2
11 -4 -3 17430.2 864.006 1
-7 11 -3 18035 835.779 2
11 -4 0 199543 3608.95 4
11 -4 0 194608 3937.78 1
11 -4 3 98223.7 1716.01 4
11 -4 3 102311 2277.24 1
11 -4 6 23748.5 670.509 4
11 -3 -13 4378.51 697.471 2
11 -3 -13 3913.86 639.653 1
11 -3 -10 10488.1 893.973 2
-8 11 -10 10278.5 978.171 2
-8 11 -7 23567.8 1265.81 2
11 -3 -4 11793.9 732.117 1
-8 11 -4 11035 700.768 2
11 -3 -1 190431 3916.54 1
11 -3 2 73651.3 1878.01 1
-3 -8 2 76230.1 1790.3 3
-3 -8 5 16251 556.67 3
11 -2 -11 1877.54 425.794 2
11 -2 -11 3577.01 549.668 1
11 -2 -8 3670.5 502.322 1
11 -2 -8 4273.96 528.632 2
-9 11 -8 3343.78 534.272 2
11 -2 -5 59781.7 1884.81 1
-9 11 -5 56934.3 1885.3 2
11 -2 -2 20537.7 931.826 1
11 -2 1 67951.4 1812.64 1
-2 -9 1 67255.9 1737.24 3
-2 -9 4 55788.1 1388.76 3
11 -2 4 54493.6 1592.53 1
11 -1 -12 9162.78 965.741 2
11 -1 -12 10974.5 985.445 1
11 -1 -9 1633.57 374.494 1
11 -1 -9 2090.61 434.139 2
11 -1 -6 43305 1625.19 1
11 -1 -3 290.108 204.699 1
-1 -10 -3 405.734 190.082 3
11 -1 0 92155.5 2298.17 1
-1 -10 0 89374.4 2228.87 3
-1 -10 3 61507.7 1595.83 3
11 -1 3 61965.6 1743.88 1
-1 -10 6 13247.8 566.102 3
11 0 -13 1914.88 486.176 2
11 0 -10 563.747 272.486 1
11 0 -10 346.309 243.047 2
11 0 -7 1302.25 322.899 1
11 0 -4 20218.9 992.294 1
0 -11 -4 18142.1 967.311 3
11 0 -1 7750.16 563.703 1
0 -11 -1 8104.2 577.217 3
11 0 2 14975.6 788.965 1
0 -11 2 14120.9 699.715 3
0 -11 5 4265.15 343.559 3
11 1 -11 11380.1 1060.69 2
11 1 -11 11325.8 981.831 1
11 1 -8 4036.07 542.063 1
11 1 -8 3150.9 520.953 2
11 1 -5 8768.76 680.692 1
11 1 -2 24060.4 1057.94 1
1 -12 -2 22773.4 1051.72 3
11 1 1 4478.45 452.325 1
1 -12 1 4487.73 420.153 3
1 -12 4 5342.76 415.851 3
11 1 4 5024.23 481.884 1
11 2 -12 1108.64 392.98 2
11 2 -9 4962.42 592.561 1
11 2 -9 4789.1 642.778 2
11 2 -6 20509.9 1097.03 1
11 2 -3 12330.1 778.524 1
2 -13 -3 11464.7 770.75 3
11 2 0 16664.1 892.522 1
2 -13 0 17108.9 879.506 3
11 2 3 23590.5 1080.03 1
11 3 -10 4463.7 595.57 1
11 3 -10 3149.69 581.374 2
11 3 -7 12257.3 867.288 1
11 3 -4 58394.2 1906.22 1
3 -14 -4 54703.4 1913.34 3
11 3 -1 145.211 170.26 1
3 -14 -1 327.657 165.855 3
11 3 2 8054.8 626.976 1
3 -14 2 7750.3 569.57 3
11 4 -11 4797.41 627.983 1
11 4 -11 5575.86 802.449 2
11 4 -8 9314.67 877.145 2
11 4 -8 8044.57 738.557 1
11 4 -5 10609.2 780.391 1
4 -15 -5 9275.17 770.183 3
11 4 -2 14669.6 874.606 1
4 -15 -2 13330.4 851.835 3
11 4 1 8125.43 654.478 1
4 -15 1 8871.46 647.515 3
11 4 4 36230.4 1481.41 1
11 5 -12 8976.6 1076.96 2
11 5 -9 4034.45 636.192 2
11 5 -9 4442.89 594.032 1
11 5 -6 17892.4 1068.86 1
5 -16 -6 19389 1158.24 3
11 5 -3 25846.9 1220.78 1
5 -16 -3 23903.5 1225.5 3
11 5 0 11893.1 822.406 1
5 -16 0 11354.3 786.226 3
11 5 3 11762.3 841.622 1
11 6 -10 4465.74 601.35 1
11 6 -10 3842.64 644.704 2
6 -17 -7 184.026 230.812 3
11 6 -7 69.8153 214.183 1
11 6 -4 27426.9 1316.86 1
6 -17 -4 28208.4 1383.95 3
11 6 -1 74384.7 2309.87 1
6 -17 -1 71836.3 2290.93 3
11 6 2 41581.2 1652.08 1
11 7 -11 5880.29 857.919 2
11 7 -8 9806.79 854.889 1
11 7 -8 9227.81 933.655 2
11 7 -5 6419.52 647.319 1
7 -18 -5 6655.67 698.737 3
11 7 -2 102242 2916.45 1
7 -18 -2 101736 2956.54 3
11 7 1 66000.7 2188.61 1
11 8 -9 -35.2796 265.048 2
11 8 -9 746.758 280.275 1
11 8 -6 9864.93 829.607 1
8 -19 -6 9063.23 843.188 3
11 8 -3 14958.5 996.109 1
8 -19 -3 13897.3 1003.64 3
11 8 0 13673.8 939.008 1
11 8 3 14761.1 1019.04 1
11 9 -10 4571.38 737.867 2
11 9 -7 1229.3 348.724 1
9 -20 -7 612.765 292.515 3
11 9 -4 75325.3 2504.94 1
9 -20 -4 71413.2 2549.76 3
11 9 -1 23828.1 1276.78 1
9 -20 -1 23931.8 1305.12 3
11 9 2 29044.6 1456.16 1
10 -21 -8 437.9 247.544 3
11 10 -8 967.495 278.789 1
11 10 -8 902.57 401.66 2
11 10 -5 1577.34 379.349 1
10 -21 -5 1694.79 462.146 3
10 -21 -2 2841.46 494.253 3
11 10 -2 2219.99 418.919 1
11 10 1 10751.8 893.309 1
11 11 -9 5962.31 845.591 2
11 11 -6 521.396 300.388 1
11 -22 -6 227.893 297 3
11 -22 -3 4859.34 652.934 3
11 11 -3 4966.38 634.761 1
11 11 0 17448.4 1169.6 1
11 12 -7 6352.85 747.15 1
11 12 -7 6263.36 810.651 2
12 -23 -7 5755.52 759.538 3
12 -23 -4 11301.1 1023.88 3
11 12 -4 11211.9 935.277 1
11 12 -1 157.06 261.363 1
12 -23 -1 439.511 259.632 3
11 12 2 -231.483 357.602 1
10 12 -8 6452.94 847.032 2
12 -22 -8 7033.82 829.634 3
10 12 -5 17290.4 1167.37 1
12 -22 -5 17863.5 1265.12 3
10 12 -2 25438.7 1370.82 1
12 -22 -2 23010.7 1388.65 3
10 12 1 1914.99 437.03 1
12 -21 -9 3857.39 623.163 3
9 12 -9 3854.45 702.068 2
12 -21 -6 5289.29 686.19 3
9 12 -6 5401.17 634.035 1
12 -21 -3 23758.7 1380.78 3
9 12 -3 21956.8 1237.95 1
9 12 0 7781.22 748.393 1
8 12 -10 823.164 389.669 2
8 12 -7 1804.23 375.29 1
8 12 -7 2819.71 540.904 2
12 -20 -7 2623.75 495.502 3
8 12 -4 8348.55 751.72 1
12 -20 -4 8833.61 838.271 3
8 12 -1 968.33 328.865 1
-20 8 8 11905.4 1000.29 4
7 12 -11 5211.73 828.217 2
7 12 -8 3055.4 566.177 2
12 -19 -8 4213.52 592.886 3
7 12 -5 13506.4 926.8 1
12 -19 -5 12100 955.332 3
7 12 -2 34733.2 1476.68 1
7 12 1 25035.4 1285.18 1
-19 7 4 36639.1 1454.31 4
-19 7 7 286.382 203.179 4
6 12 -9 11354.1 1073.63 2
12 -18 -9 11557.1 945.464 3
6 12 -6 3620.37 568.104 2
6 12 -6 3033.34 437.36 1
12 -18 -6 3511.62 529.011 3
6 12 -3 60563.8 1988.41 1
6 12 0 22727.4 1166.75 1
-18 6 3 8132.12 596.589 4
-18 6 6 5079.1 565.574 4
-18 6 9 666.313 295.351 4
5 12 -10 2151.4 542.4 2
5 12 -7 1909.53 326.335 1
5 12 -7 2409.55 480.854 2
12 -17 -7 1935.47 384.824 3
12 -17 -4 825.411 286.897 3
5 12 -4 699.266 217.562 1
5 12 -1 109745 2881.77 1
-17 5 2 41916.3 1354.06 4
-17 5 5 1024.28 275.979 4
-17 5 8 8473.73 795.513 4
4 12 -11 -53.2137 349.801 2
4 12 -8 37825.6 1851.41 2
12 -16 -8 37227.7 1627.07 3
4 12 -5 17468.1 1078.79 2
4 12 -5 18706.5 966.897 1
12 -16 -5 18528.2 1072.44 3
4 12 -2 55965 1785.87 1
-16 4 1 35887 1121.17 4
-16 4 4 19522.2 975.032 4
-16 4 7 9104.61 775.61 4
-16 4 10 5790.97 737.007 4
3 12 -12 33516.4 2088.05 2
3 12 -9 2002.62 447.359 2
3 12 -6 1276.06 249.877 1
3 12 -6 604.415 271.677 2
12 -15 -6 925.973 262.996 3
3 12 -3 21398.4 983.267 1
3 12 0 15453.1 862.352 1
12 -15 3 83081.7 1629.39 1
-15 3 3 80439.8 2137.28 4
-15 3 6 738.205 248.793 4
-15 3 9 14509.8 1080.83 4
2 12 -10 15327.9 1266.39 2
2 12 -7 54870.2 2125.28 2
2 12 -7 55199.2 1667.93 1
12 -14 -7 51541.3 1846.25 3
2 12 -4 55176.1 1624.74 1
2 12 -4 50859.6 1815.73 2
2 12 -1 888.008 208.977 1
-14 2 2 30910.4 1061.69 4
-14 2 5 1726 314.416 4
-14 2 8 24326.8 1332.59 4
1 12 -11 1059.54 409.928 2
1 12 -8 621.164 298.086 2
12 -13 -8 539.054 212.498 3
1 12 -5 33612.4 1450.21 2
12 -13 -5 36388.7 943.87 2
1 12 -5 33842.9 1173.69 1
1 12 -2 7302.71 512.798 1
-13 1 1 43226.8 1201.4 4
-13 1 4 10793.3 675.694 4
-13 1 7 1478 317.51 4
-13 1 10 1932.96 453.75 4
0 12 -12 5470.34 860.411 2
0 12 -9 530.821 292.074 2
0 12 -6 14101.1 950.585 2
12 -12 -6 14173.3 611.341 2
0 12 -6 12935.6 650.402 1
12 -12 -6 14640.9 828.906 3
0 12 -3 35625.7 1315.03 2
0 12 -3 34958.7 1146.13 1
-12 0 0 7793.96 382.497 4
12 -12 3 26793.9 715.907 1
-12 0 3 25107.7 1009.37 4
-12 0 6 927.506 264.533 4
-12 0 9 4343.96 579.004 4
-1 12 -10 11248.7 1054.98 2
12 -11 -7 4250.17 372.046 2
-1 12 -7 2823.24 479.971 2
12 -11 -7 4022.33 415.112 3
-1 12 -4 5504.57 378.761 1
-1 12 -4 5684.2 535.775 2
-1 12 -1 4369.12 365.705 2
-11 -1 -1 4629.73 239.254 4
12 -11 2 24340 775.54 1
-11 -1 5 7998.2 614.586 4
-11 -1 8 4207.01 542.041 4
-11 -1 11 10719.2 983.066 4
-2 12 -11 4511.5 730.513 2
-2 12 -8 1163.9 355.931 2
12 -10 -8 1449.59 268.869 2
-2 12 -5 11665 802.948 2
-2 12 -5 12629 531.683 1
-2 12 -2 29631.8 1062.27 2
12 -10 1 87954.8 1991.75 1
-2 12 4 75625 1532.89 2
12 -10 4 83840.8 1607.05 1
-10 -2 7 34153.6 1468.42 4
-10 -2 10 4192.07 589.519 4
-3 12 -12 8860.51 1036.21 2
-3 12 -9 33770.5 1755.8 2
12 -9 -9 32533.9 1369.43 2
-3 12 -6 39778.2 1621.06 2
12 -9 -6 36729.7 1244.06 3
-3 12 -3 11201.9 672.716 2
-9 -3 -3 11184.4 315.842 4
-3 12 0 53508.7 1296.31 2
12 -9 0 50349.4 1427.12 1
12 -9 3 146561 2847.61 1
-9 -3 9 3770 528.84 4
-4 12 -13 1806.23 574.634 2
-4 12 -10 3046.72 580.247 2
12 -8 -10 4047.47 514.193 2
-4 12 -7 26480.7 1391.38 2
12 -8 -7 24784.2 1089.61 2
12 -8 -7 25744.2 932.439 3
-4 12 -4 99900.7 2593.6 2
-8 -4 -4 99260.4 1865.6 4
-4 12 -1 36442.3 1090.96 2
12 -8 2 59244 1480.78 1
-8 -4 11 5786.88 726.927 4
-5 12 -11 7432.7 890.447 2
-5 12 -8 43281.7 1895.24 2
12 -7 -8 39778.1 1531.91 2
-5 12 -5 21203.7 1085.29 2
-7 -5 -5 21668.4 666.316 4
-5 12 -2 530.432 151.238 2
12 -7 1 12296.1 506.167 4
12 -7 1 12141.2 594.835 1
-5 12 1 12311.7 398.801 2
12 -7 4 13187.4 567.108 1
-7 -5 10 2109.74 423.008 4
-6 12 -12 22570.1 1624.64 2
12 -6 -9 12493.3 870.35 2
-6 12 -9 12197.6 1026.4 2
-6 12 -6 10296.5 803.013 2
12 -6 -6 10242.1 497.355 3
-6 12 -3 106779 2596.47 2
12 -6 0 27301 843.792 4
12 -6 0 27247.3 998.351 1
-6 12 0 27843.2 806.218 2
12 -6 3 46820.1 1317.67 1
-7 12 -13 2610.43 627.287 2
-7 12 -10 1582.21 446.306 2
12 -5 -10 1900.71 393.971 2
-7 12 -7 59234.7 2152.35 2
-7 12 -4 24440 1083.38 2
12 -5 -1 65399.1 1815.5 1
-7 12 -1 67498.3 1623.32 2
12 -5 2 53976.2 1517.93 1
12 -5 2 58022.9 1180.04 4
-5 -7 11 4066.92 611.619 4
-8 12 -11 917.607 383.736 2
12 -4 -11 279.195 233.7 2
12 -4 -8 39289.8 1631.8 2
-8 12 -8 37755.5 1752.82 2
-8 12 -5 7282.16 621.422 2
-8 12 -2 130713 2855.04 2
12 -4 -2 131895 3039.78 1
12 -4 1 8445.19 535.678 1
12 -4 4 48393.9 1425.96 1
12 -3 -12 11578.7 1051.45 2
12 -3 -12 11883.4 1056.24 1
-9 12 -9 987.461 330.2 2
12 -3 -9 1571.09 374.435 2
-9 12 -6 41721.4 1677.12 2
12 -3 -6 44849.6 1674.81 1
12 -3 -3 20094.7 997.544 1
12 -3 0 4976.58 431.063 1
-3 -9 0 5028.44 418.927 3
12 -3 3 3100.5 328.796 1
-3 -9 3 3343.8 297.348 3
-3 -9 6 4946.1 281.845 3
12 -2 -13 4016.61 640.858 1
12 -2 -13 2949.23 567.264 2
12 -2 -10 6812.5 748.293 2
12 -2 -10 8640.61 834.511 1
12 -2 -7 16635.2 1020.51 1
12 -2 -4 11326.3 749.03 1
-2 -10 -1 153479 3414.56 3
12 -2 -1 155811 3455.46 1
12 -2 2 12644.8 699.941 1
-2 -10 2 12072.1 622.774 3
12 -2 5 47479.1 1497.18 1
-2 -10 5 42488 1192.44 3
12 -1 -11 13860.5 1141.3 2
12 -1 -11 14516.3 1119.79 1
12 -1 -8 17142.2 1084.2 1
12 -1 -5 6056.97 578.737 1
-1 -11 -2 12921.6 772.789 3
12 -1 -2 14748.8 813.664 1
12 -1 1 4922.5 456.202 1
-1 -11 1 4694.37 412.351 3
12 -1 4 8973.62 616.149 1
-1 -11 4 9371.34 522.681 3
12 0 -12 11385.1 1116.57 2
12 0 -12 13490.1 1127.34 1
12 0 -9 5287.69 647.83 1
12 0 -9 4786.31 627.009 2
12 0 -6 1431.27 339.423 1
0 -12 -3 27657.3 1220.01 3
12 0 -3 29515.6 1245.37 1
12 0 0 8287.22 617.251 1
0 -12 0 7951.87 585.936 3
12 0 3 33453 1284.86 1
0 -12 3 33174.7 1164.54 3
0 -12 6 13556.2 648.991 3
12 1 -13 5775.51 876.687 2
12 1 -10 6609.66 721.956 1
12 1 -10 7339.11 820.809 2
12 1 -7 20269.4 1138.07 1
1 -13 -4 59327.3 1982.73 3
12 1 -4 58710.7 1938.67 1
12 1 -1 7554.82 609.318 1
1 -13 -1 7139.67 585.254 3
12 1 2 11601 745.106 1
1 -13 2 11188.7 677.414 3
1 -13 5 40289.6 1315.55 3
12 2 -11 9644.68 1011.03 2
12 2 -11 8065.14 847.007 1
12 2 -8 6351.37 673.454 1
2 -14 -5 93729.4 2741.65 3
12 2 -5 94060.8 2694.53 1
12 2 -2 1298.24 316.688 1
2 -14 -2 1032.86 257.89 3
12 2 1 35154 1394.91 1
2 -14 1 33951.5 1305.11 3
2 -14 4 20699.5 946.092 3
12 2 4 23407.3 1125.12 1
12 3 -12 2143.07 577.913 2
12 3 -9 9868 946.932 2
12 3 -9 9542.7 853.812 1
3 -15 -6 5961.81 644.788 3
12 3 -6 7342.8 677.782 1
12 3 -3 5653.3 570.701 1
3 -15 -3 5877.4 582.882 3
12 3 0 30821.4 1336.5 1
3 -15 0 31046.7 1303.32 3
12 3 3 79927 2356.34 1
3 -15 3 78119.6 2198.84 3
12 4 -10 9103.66 970.341 2
12 4 -10 8148.68 830.837 1
12 4 -7 16128.1 1053.42 1
12 4 -4 20469.4 1122.78 1
4 -16 -4 19710.8 1138.19 3
12 4 -1 12263.3 837.411 1
4 -16 -1 12044 823.022 3
12 4 2 522.011 265.384 1
4 -16 2 846.59 248.49 3
12 5 -11 2609.51 620.227 2
12 5 -8 469.91 290.343 1
5 -17 -5 5606.67 647.292 3
12 5 -5 5340.31 590.938 1
12 5 -2 71845.2 2284.18 1
5 -17 -2 69670.9 2283.72 3
12 5 1 31549.1 1404.12 1
5 -17 1 30870.5 1353.39 3
12 5 4 3729.09 517.293 1
12 6 -9 6498.92 726.734 1
12 6 -9 6292.7 822.509 2
12 6 -6 297.817 252.642 1
6 -18 -6 218.893 218.169 3
12 6 -3 78361.3 2472.12 1
6 -18 -3 76733.3 2506.85 3
12 6 0 40882.6 1689.09 1
6 -18 0 43414.5 1704.7 3
12 6 3 3884.41 528.863 1
12 7 -10 4997.63 752.708 2
7 -19 -7 1174.54 341.985 3
12 7 -7 1398.15 375.887 1
12 7 -4 25079.5 1327.22 1
7 -19 -4 24984.4 1385.09 3
12 7 -1 1015.94 330.212 1
7 -19 -1 1083.91 318.67 3
12 7 2 9054.88 781.765 1
8 -20 -8 6610.57 781.955 3
12 8 -8 6649.6 832.61 2
12 8 -8 5071.95 669.469 1
12 8 -5 5487.92 649.259 1
8 -20 -5 5291.78 675.113 3
12 8 -2 31924.4 1536.44 1
8 -20 -2 33809.3 1613.15 3
12 8 1 2093.1 419.06 1
12 9 -9 6018.09 736.301 1
12 9 -9 5338.31 792.417 2
12 9 -6 11818 966.249 1
9 -21 -6 10336.2 974.953 3
12 9 -3 9946.11 853.38 1
9 -21 -3 9058.14 857.108 3
12 9 0 71744.5 2441.56 1
9 -21 0 66464.5 2405.35 3
12 9 3 21621.7 1300.24 1
12 10 -7 2870.67 518.884 1
10 -22 -7 2928.64 554.188 3
12 10 -4 17836.8 1185.44 1
10 -22 -4 15816.9 1176.27 3
12 10 -1 5631.08 652.759 1
10 -22 -1 5288.72 653.635 3
12 10 2 1366.59 373.257 1
12 11 -8 5012.19 680.977 1
12 11 -8 3974.22 721.565 2
12 11 -5 11139.8 981.055 1
11 -23 -5 11651.1 1060.11 3
12 11 -2 5928.15 701.618 1
11 -23 -2 5280.15 693.146 3
12 11 1 9522.21 885.649 1
12 12 -6 16933.9 1239.13 1
12 -24 -6 17033.8 1315.98 3
12 12 -3 1361.7 403.61 1
12 -24 -3 1269.23 397.834 3
12 12 0 4189.1 636.358 1
12 -24 0 3096.42 564.99 3
12 13 -7 4080.13 688.389 2
12 13 -7 4004.29 639.909 1
12 13 -4 4997.97 670.051 1
13 -25 -4 6548.09 827.786 3
12 13 -1 605.974 298.216 1
13 -25 -1 763.24 326.205 3
11 13 -8 773.846 400.754 2
11 13 -5 8420.44 848.674 1
13 -24 -5 8971.3 938.888 3
11 13 -2 4918.58 655.731 1
13 -24 -2 5206.52 710.353 3
11 13 1 9714.15 916.987 1
10 13 -9 7237.83 917.297 2
10 13 -6 278.172 241.787 1
13 -23 -6 100.831 236.472 3
13 -23 -3 431.756 268.981 3
10 13 -3 283.089 242.263 1
10 13 0 25708 1434.76 1
9 13 -7 3210.85 620.502 2
9 13 -7 3880.81 568.531 1
13 -22 -7 3186.4 561.783 3
9 13 -4 9802.27 844.999 1
13 -22 -4 8285.51 874.936 3
9 13 -1 10411.4 870.008 1
8 13 -8 1517.05 475.09 2
13 -21 -8 1816.78 434.261 3
13 -21 -5 10103.9 910.262 3
8 13 -5 10435.7 850.762 1
8 13 -2 6215.31 646.437 1
8 13 1 1996.81 417.348 1
-21 8 7 6071.36 697.487 4
7 13 -9 1000.83 401.053 2
13 -20 -9 961.55 357.897 3
7 13 -6 4764.81 577.436 1
7 13 -6 4251.23 638.786 2
13 -20 -6 4968.7 652.292 3
7 13 -3 39426.1 1641.64 1
7 13 0 15064.8 993.071 1
-20 7 6 10389.3 836.187 4
6 13 -10 804.189 328.912 2
6 13 -7 11371.6 997.268 2
6 13 -7 11421.5 839.409 1
13 -19 -7 11469 942.503 3
6 13 -4 78638.3 2386.81 1
13 -19 -4 76454.5 2580.25 3
6 13 -1 73343.8 2331.34 1
-19 6 5 14055.3 913.294 4
-19 6 8 11166.1 949.236 4
5 13 -11 5484.61 846.036 2
5 13 -8 5778.12 747.862 2
13 -18 -8 6691.63 702.664 3
5 13 -5 18229.9 1169.88 2
5 13 -5 22293.9 1124.44 1
13 -18 -5 22252.7 1245.62 3
5 13 -2 2082.35 347.512 1
-18 5 4 17555.6 944.555 4
-18 5 7 422.106 227.117 4
4 13 -9 3509.92 628.882 2
4 13 -6 26029.4 1409.98 2
4 13 -6 26737.8 1205.96 1
13 -17 -6 27062.5 1375.95 3
4 13 -3 70221.4 2117.89 1
4 13 0 2227.42 357.573 1
-17 4 3 1717.66 270.846 4
-17 4 6 -92.3446 185.637 4
-17 4 9 18407.1 1257 4
3 13 -10 5214 791.682 2
3 13 -7 4474.87 617.923 2
13 -16 -7 4364.69 534.717 3
3 13 -4 40605.2 1645.72 2
3 13 -4 43324.8 1494.69 1
3 13 -1 2015.25 328.665 1
-16 3 2 689.474 175.028 4
-16 3 5 8607.46 675.701 4
-16 3 8 14405.5 1044.88 4
2 13 -11 11059.1 1161.09 2
13 -15 -8 22801.3 1198.57 3
2 13 -8 23604.5 1451.3 2
2 13 -5 146758 3753.76 2
2 13 -5 151967 3375.36 1
13 -15 -5 149553 3683.13 3
2 13 -2 43014.6 1467.55 1
-15 2 1 65484.6 1642.22 4
-15 2 4 53413.2 1727.29 4
-15 2 7 26029 1331.41 4
-15 2 10 1345.23 414.998 4
1 13 -12 31193.3 2024.15 2
1 13 -9 12392.5 1080.29 2
1 13 -6 22876.9 1251.08 2
13 -14 -6 19304.2 1046.9 3
1 13 -6 21911.1 926.528 1
1 13 -3 9682.84 692.846 2
1 13 -3 9376.03 600.635 1
-14 1 0 19420.4 663.641 4
-14 1 3 15047.3 771.135 4
13 -14 3 15078.8 508.981 1
-14 1 6 8771.33 705.563 4
-14 1 9 11639.8 967.081 4
0 13 -10 6312.62 834.719 2
0 13 -7 11050.6 914.025 2
13 -13 -7 10728.5 737.679 3
0 13 -4 8478.47 659.396 2
0 13 -4 8172 520.096 1
-13 0 -1 14554.3 469.99 4
-13 0 2 33579.7 1132.66 4
13 -13 2 35795.3 1013.48 1
-13 0 5 12321.6 786.55 4
-13 0 8 6188.52 661.816 4
-1 13 -11 12186.7 1199.98 2
-1 13 -8 6870.6 757.74 2
-1 13 -5 41951.8 1626.58 2
-1 13 -5 40194.2 1208.82 1
-1 13 -2 12398.3 692.452 2
-12 -1 1 8924.45 472.911 4
13 -12 1 6594.72 430.245 1
-12 -1 4 60923.2 1841.61 4
13 -12 4 61664.1 1242.93 1
-12 -1 7 19096.9 1097.48 4
-12 -1 10 7770.11 815.282 4
-2 13 -12 171.75 365.821 2
-2 13 -9 2695.05 524.707 2
-2 13 -6 17163.8 1055.59 2
13 -11 -6 15406.4 821.008 3
-2 13 -3 24003.8 1043.89 2
-2 13 0 16414.7 671.664 2
13 -11 3 11352 489.604 1
-11 -2 6 17743.7 997.716 4
-11 -2 9 5312.12 655.578 4
-3 13 -10 1257.99 440.011 2
-3 13 -7 25059.5 1364.52 2
13 -10 -7 24609.9 1019.75 3
13 -10 -7 26016.8 1064.24 2
-3 13 -4 12912.8 801.242 2
-3 13 -1 20449.9 813.226 2
-3 13 2 2444.15 169.62 2
13 -10 2 2430.08 243.507 1
-10 -3 8 50949.2 1965.75 4
-4 13 -11 2628.84 577.675 2
13 -9 -8 4543.28 464.997 2
-4 13 -8 3755.82 593.384 2
-4 13 -5 1301.17 303.627 2
-4 13 -2 26741.9 1009.7 2
-4 13 1 14909.4 511.236 2
13 -9 1 15418.8 685.355 1
13 -9 4 42468.3 1117.99 1
-9 -4 10 3223.5 544.501 4
-5 13 -12 4428.2 747.711 2
-5 13 -9 17451.6 1249.24 2
13 -8 -9 17845.1 1028.08 2
-5 13 -6 95026.6 2817.92 2
-5 13 -3 13107.2 737.459 2
-5 13 0 21291.3 712.684 2
13 -8 0 19778.6 844.163 1
13 -8 3 80339.3 1884.19 1
-6 13 -10 4001.64 636.053 2
13 -7 -10 3504.93 492.297 2
-6 13 -7 64962.5 2320.23 2
-7 -6 -4 2776.62 219.902 4
-6 13 -4 3313 408.662 2
-6 13 -1 26166.8 905.864 2
13 -7 -1 26801.5 1053.06 1
13 -7 2 39234.8 1002.55 4
13 -7 2 38954 1207.38 1
13 -7 5 31731.8 1021.5 1
-7 -6 11 6946.31 779.15 4
-7 13 -11 1468.09 474.7 2
13 -6 -11 1988.7 414.153 2
-7 13 -8 5637.91 670.934 2
13 -6 -8 4221.86 506.62 2
-6 -7 -5 42371.3 1151.73 4
-7 13 -5 44171.6 1647.32 2
13 -6 -2 3169.15 363.997 1
-7 13 -2 2705.36 315.467 2
13 -6 1 14308.6 702.355 1
13 -6 1 14021.4 527.546 4
13 -6 4 41979.6 1265.67 1
13 -5 -12 3466.25 581.281 2
-8 13 -12 2401.43 564.086 2
13 -5 -9 28967.3 1431.7 2
-8 13 -9 26695 1545.78 2
-8 13 -6 75703.3 2409.58 2
13 -5 -3 44109.9 1532.51 1
-8 13 -3 43820.8 1449.5 2
13 -5 0 157460 3003.55 4
13 -5 0 150047 3336.68 1
13 -5 3 40432.8 810.039 4
13 -5 3 42311.8 1315.07 1
13 -4 -13 6906.39 840.281 1
-9 13 -10 3654.15 638.367 2
13 -4 -10 3964.33 567.378 2
13 -4 -7 27104.8 1347.3 1
-9 13 -7 27333.4 1405.11 2
13 -4 -4 7396.08 617.705 1
-9 13 -4 8578 638.06 2
13 -4 -1 78886.1 2125.68 1
13 -4 2 3640.42 367.384 1
13 -4 5 12895.2 698.194 1
13 -3 -11 7341.63 812.476 2
13 -3 -11 8482.58 875.832 1
13 -3 -8 20810.2 1221.52 1
-10 13 -8 21944.1 1319.35 2
13 -3 -5 26905.4 1262.19 1
13 -3 -2 11382.5 721.132 1
13 -3 1 102655 2527.12 1
-3 -10 1 100862 2428.28 3
-3 -10 4 23727.1 860.443 3
13 -3 4 25744.7 1041.93 1
13 -2 -12 3971.97 643.391 1
13 -2 -12 3588.86 654.286 2
13 -2 -9 4265.91 587.445 1
13 -2 -9 5329.26 657.692 2
13 -2 -6 41813.2 1679.98 1
13 -2 -3 13135.1 808.701 1
13 -2 0 110155 2740.28 1
-2 -11 0 111030 2688.71 3
-2 -11 3 6767.83 475.546 3
13 -2 3 8223.09 585.398 1
-2 -11 6 47478.8 1267.76 3
13 -1 -13 260.739 290.368 1
13 -1 -13 310.548 333.013 2
13 -1 -10 2876.81 511.611 1
13 -1 -10 2766.51 514.181 2
13 -1 -7 1818.04 387.461 1
13 -1 -4 11357.8 789.348 1
13 -1 -1 44847.6 1554.14 1
-1 -12 -1 42850.4 1510.18 3
13 -1 2 7792.84 597.996 1
-1 -12 2 7291.06 521.461 3
13 -1 5 32482.9 1299.78 1
-1 -12 5 32325.1 1094.05 3
13 0 -11 8541.45 938.585 2
13 0 -11 8075.02 860.151 1
13 0 -8 5915.79 673.883 1
13 0 -5 15500.9 963.589 1
13 0 -2 38609 1473.78 1
0 -13 -2 35830 1423.22 3
13 0 1 15018.9 848.719 1
0 -13 1 13630.1 771.842 3
0 -13 4 8659.3 567.906 3
13 0 4 8861.34 658.055 1
13 1 -12 22877.6 1621.5 2
13 1 -12 20866.5 1420.38 1
13 1 -9 7874.54 837.583 2
13 1 -9 8708.67 825.526 1
13 1 -6 18782.8 1100.21 1
13 1 -3 27155.9 1249.06 1
1 -14 -3 24935.5 1223.24 3
13 1 0 15499.2 901.925 1
1 -14 0 13803.2 822.051 3
13 1 3 62324.1 1960.68 1
1 -14 3 58616.2 1795.53 3
1 -14 6 3114.77 336.353 3
13 2 -10 6827.41 773.746 1
13 2 -10 6255.19 799.665 2
13 2 -7 23476.3 1288.6 1
13 2 -4 24602.8 1234.58 1
2 -15 -4 23349.2 1224.66 3
13 2 -1 850.528 277.052 1
2 -15 -1 994.316 270.311 3
2 -15 2 468.837 196.814 3
13 2 2 395.489 195.265 1
2 -15 5 1139.08 234.489 3
13 3 -11 10533.3 1083.43 2
13 3 -11 10336.5 968.109 1
13 3 -8 5290.92 653.283 1
13 3 -5 33620.5 1527.6 1
3 -16 -5 32820.8 1540.66 3
13 3 -2 6337.94 621.211 1
3 -16 -2 6100.67 606.24 3
13 3 1 24290.6 1208.9 1
3 -16 1 22813.3 1116.54 3
3 -16 4 10029.1 692.038 3
13 3 4 11811.7 857.734 1
13 4 -9 14002.1 1085.33 1
13 4 -9 13174.9 1130.45 2
13 4 -6 8636.95 785.183 1
4 -17 -6 6614.58 710.757 3
13 4 -3 23914.2 1250.15 1
4 -17 -3 27274.9 1349.12 3
13 4 0 31404.3 1422.93 1
4 -17 0 28548.6 1328.03 3
4 -17 3 16386.2 932.365 3
13 4 3 15080.6 976.275 1
13 5 -10 2742.76 595.907 2
13 5 -10 2530.82 482.024 1
13 5 -7 1877.79 413.965 1
13 5 -4 45128.1 1820.86 1
5 -18 -4 42749 1830.05 3
13 5 -1 1593.81 375.679 1
5 -18 -1 1617.1 356.916 3
13 5 2 4482.44 562.314 1
5 -18 2 4104.49 499.65 3
13 6 -11 1533.44 467.843 2
13 6 -8 3846.95 591.496 1
6 -19 -5 4999 650.364 3
13 6 -5 4250.05 583.661 1
13 6 -2 8873.21 774.564 1
6 -19 -2 9343.43 806.036 3
13 6 1 20162.9 1167.04 1
6 -19 1 19817.5 1131.78 3
13 6 4 53165.6 2056.05 1
13 7 -9 5890.07 730.247 1
13 7 -9 5226.6 755.677 2
13 7 -6 20889.6 1286.85 1
7 -20 -6 21679.7 1382.96 3
13 7 -3 2124.74 405.448 1
7 -20 -3 1875.32 445.011 3
7 -20 0 5159.27 615.287 3
13 7 0 4573.31 587.25 1
13 7 3 26518.8 1413.97 1
13 8 -10 868.135 439.114 2
13 8 -7 4871.73 651.313 1
8 -21 -7 3509.16 591.45 3
13 8 -4 13791.8 1030.83 1
8 -21 -4 14668.2 1113.04 3
8 -21 -1 4467.1 595.753 3
13 8 -1 4417.53 597.274 1
13 8 2 11082.6 914.058 1
13 9 -8 1655.03 393.271 1
9 -22 -8 1854.77 482.544 3
13 9 -8 1141.59 413.006 2
13 9 -5 51323.4 2148.99 1
9 -22 -5 51484.4 2257 3
13 9 -2 2472.05 501.937 1
9 -22 -2 2431.66 488.556 3
13 9 1 31139.9 1569.05 1
9 -22 1 25941 1436.2 3
13 10 -9 17594.1 1459.38 2
13 10 -6 840.402 352.227 1
10 -23 -6 1013.25 406.637 3
13 10 -3 13837.9 1081.5 1
10 -23 -3 15368.6 1174.87 3
13 10 0 222.274 241.144 1
10 -23 0 -51.1373 222.858 3
13 10 3 10972.1 969.653 1
13 11 -7 1338.82 433.083 1
13 11 -4 3068.03 566.003 1
11 -24 -4 3408.76 604.56 3
13 11 -1 14920.7 1125.9 1
11 -24 -1 13629.5 1122.63 3
13 11 2 36953.1 1848.81 1
13 12 -5 -6.4436 230.564 1
13 12 -2 5328.49 680.565 1
12 -25 -2 6465.67 799.224 3
13 12 1 690.387 317.698 1
12 -25 1 454.996 311.767 3
13 13 -6 71.8021 229.291 1
13 13 -3 7572.06 852.71 1
13 13 0 4943.9 709.055 1
13 -26 0 4320.82 668.677 3
13 14 -4 2681.81 545.165 1
13 14 -1 5080.41 745.84 1
12 14 -5 47.1787 274.953 1
14 -26 -2 742.741 329.908 3
12 14 -2 -289.669 325.13 1
12 14 1 -417.116 360.997 1
11 14 -6 2980.81 540.591 1
11 14 -3 4189.85 621.34 1
14 -25 -3 3905.57 640.888 3
11 14 0 17626 1251.34 1
10 14 -7 8722.31 989.502 2
10 14 -4 1281.39 382.697 1
14 -24 -4 1908.98 485.554 3
10 14 -1 4849.7 641 1
9 14 -8 269.764 304.486 2
9 14 -5 4104.56 583.272 1
14 -23 -5 3388.47 570.506 3
9 14 -2 7179.22 741.471 1
8 14 -9 7341.69 930.668 2
8 14 -6 1291.77 373.444 2
14 -22 -6 814.969 318.362 3
8 14 -6 1789.59 385.447 1
8 14 -3 12434.8 944.614 1
14 -22 -3 11626.9 995.738 3
8 14 0 299.858 233.357 1
7 14 -10 13653.7 1288.58 2
7 14 -7 14165 1152.54 2
14 -21 -7 15951.8 1182.67 3
7 14 -4 10830.4 847.717 1
14 -21 -4 12025.5 995.17 3
7 14 -1 12404.5 923.988 1
-21 7 5 18227 1080.42 4
-21 7 8 4765.3 654.429 4
14 -20 -8 5400.9 689.453 3
6 14 -8 5269.63 735.861 2
6 14 -5 2749.65 430.677 1
6 14 -5 2539.99 482.254 2
14 -20 -5 3089.3 512.104 3
6 14 -2 68224.4 2267.36 1
-20 6 4 75556.8 2295.81 4
-20 6 7 1050 331.935 4
5 14 -9 2490.38 587.718 2
5 14 -6 38997.3 1843.59 2
5 14 -6 43189.1 1655.12 1
14 -19 -6 40730 1826.33 3
5 14 -3 3649.63 460.334 1
-19 5 3 22730.2 1051.96 4
-19 5 6 7381.61 700.11 4
-19 5 9 559.315 299.654 4
4 14 -10 1894.6 529.919 2
4 14 -7 9288.18 880.896 2
14 -18 -7 8353.9 782.806 3
4 14 -4 1820.53 332.753 1
4 14 -1 5724.66 568.608 1
-18 4 2 21279 926.309 4
-18 4 5 11219.6 806.794 4
-18 4 8 3197.26 518.09 4
3 14 -11 654.946 404.626 2
3 14 -8 16295.6 1225.04 2
14 -17 -8 16711.5 1084.95 3
3 14 -5 7610.08 732.893 2
3 14 -5 7308.18 594.179 1
14 -17 -5 7856.18 717.05 3
3 14 -2 5664.95 530.975 1
-17 3 1 17362.3 739.4 4
-17 3 4 3366.69 416.098 4
-17 3 7 2789.59 460.082 4
2 14 -9 10991.4 1051.48 2
2 14 -6 5661.24 642.998 2
2 14 -6 5382.94 483.049 1
14 -16 -6 6356.6 647.763 3
2 14 -3 47455.1 1715.77 2
2 14 -3 45024.5 1558.6 1
-16 2 0 6832.86 386.478 4
-16 2 3 63074.8 1844.57 4
-16 2 6 24128.9 1232.28 4
-16 2 9 1661.35 418.134 4
1 14 -10 5164.67 787.353 2
1 14 -7 3869.03 559.198 2
14 -15 -7 3777.05 480.851 3
1 14 -4 19108.9 1060.1 2
1 14 -4 20264.8 926.709 1
-15 1 2 16940.9 778.57 4
14 -15 2 16868.3 666.902 1
-15 1 5 29479.3 1286.13 4
-15 1 8 6934.43 714.77 4
0 14 -11 3764.69 700.333 2
0 14 -8 13099.6 1071.69 2
14 -14 -8 13742.3 875.082 3
0 14 -5 9144.87 752.258 2
0 14 -5 8105.38 534.503 1
0 14 -2 51582.6 1657.45 2
-14 0 1 1640.74 216.238 4
-14 0 4 99609.8 2588.27 4
-14 0 7 4891.39 569.57 4
-14 0 10 5314.53 687.237 4
-1 14 -12 690.638 381.185 2
-1 14 -9 2420.82 493.058 2
-1 14 -6 3546.58 513.261 2
14 -13 -6 3155.32 409.845 3
-1 14 -3 60601.3 1868.05 2
-13 -1 0 14346.6 575.44 4
14 -13 3 27756.9 817.72 1
-13 -1 3 25491.4 1054.42 4
-13 -1 6 17546.7 1019.15 4
-13 -1 9 8610.09 825.652 4
-2 14 -10 10342.6 1042.6 2
-2 14 -7 4867.3 620.346 2
14 -12 -7 5097.38 489.156 3
-2 14 -4 21895.9 1096.09 2
-2 14 -1 34011.6 1146.31 2
14 -12 2 1247.26 185.536 1
-12 -2 5 88684.8 2488.02 4
-12 -2 8 7194.24 709.742 4
-3 14 -11 1343.87 463.087 2
-3 14 -8 2069.78 443.034 2
-3 14 -5 9475.99 744.849 2
-3 14 -2 8871.02 573.544 2
14 -11 1 102.919 108.848 1
-3 14 1 270.214 82.2737 2
14 -11 4 58374 1367.05 1
-11 -3 7 13517.6 928.738 4
-11 -3 10 4541.82 632.335 4
-4 14 -12 7934.04 985.928 2
-4 14 -9 3880.24 625.285 2
-4 14 -6 1166.31 293.575 2
-4 14 -3 22730.5 1016.07 2
-4 14 0 30623.2 960.434 2
14 -10 0 32334.7 1127.75 1
14 -10 3 63617.8 1571.85 1
-10 -4 9 6569.02 713.27 4
-5 14 -10 7286.56 877.574 2
-5 14 -7 4613.12 614.333 2
-5 14 -4 2599.12 378.285 2
-5 14 -1 61705.7 1603.01 2
14 -9 -1 59066.7 1742.28 1
14 -9 2 75223.9 1868.48 1
14 -9 5 24388.7 818.332 1
-6 14 -11 124.977 324.474 2
-6 14 -8 3196.79 527.966 2
14 -8 -8 2495.47 382.786 2
-6 14 -5 50875.7 1834.62 2
14 -8 -2 1038.35 252.435 1
-6 14 -2 1282.75 240.783 2
14 -8 1 906.74 197.784 1
14 -8 1 1069.41 154.482 4
-6 14 1 949.091 111.742 2
14 -8 4 16335.2 705.116 1
-8 -6 10 4236.18 621.306 4
-7 14 -12 1705.88 481.331 2
14 -7 -9 15364.8 992.105 2
-7 14 -9 18401.5 1278.38 2
-7 14 -6 11766.4 872.132 2
14 -7 -3 6030.3 535.24 1
-7 14 -3 5800.97 495.772 2
14 -7 0 28085.2 1081.35 1
-7 14 0 27457.4 838.213 2
14 -7 3 17092.6 771.135 1
14 -7 3 18156.3 560.605 4
14 -6 -13 8879.47 991.599 1
14 -6 -10 9055.9 817.443 2
-8 14 -10 7900.03 884.945 2
-8 14 -7 28260.4 1459.49 2
14 -6 -4 32186.8 1361.27 1
-8 14 -4 31692.9 1294.84 2
14 -6 -1 677.961 214.759 1
-8 14 -1 651.428 142.213 2
14 -6 2 37623.3 1279.28 1
14 -6 2 40316.3 945.83 4
14 -6 5 1637.22 247.474 1
14 -5 -11 11693.9 1015.13 2
14 -5 -11 12596.9 1090.25 1
-9 14 -11 11399.4 1125.51 2
-9 14 -8 1871.04 459.433 2
-9 14 -5 4801.18 528.626 2
14 -5 -5 5213.97 578.289 1
14 -5 -2 12698.3 771.281 1
14 -5 1 109312 2636.31 1
14 -5 4 9578.31 595.426 1
14 -4 -12 16544.9 1282.62 2
14 -4 -12 19971.2 1417.8 1
14 -4 -9 8627.45 808.655 2
14 -4 -9 8572.85 831.482 1
-10 14 -9 8997.52 905.589 2
14 -4 -6 31318.5 1427.29 1
-10 14 -6 24993.5 1316.34 2
14 -4 -3 17553.3 954.763 1
14 -4 0 16744 862.786 1
14 -4 3 27959.3 1130.34 1
14 -3 -13 6371.38 837.201 2
14 -3 -13 8907.33 980.814 1
14 -3 -10 3132.27 559.225 1
14 -3 -10 4128.69 600.996 2
14 -3 -7 23705.7 1292.31 1
14 -3 -4 15430.1 927.031 1
14 -3 -1 5690.31 522.396 1
14 -3 2 56516.5 1745.4 1
-3 -11 2 54616.7 1613.69 3
-3 -11 5 28774.7 965.785 3
14 -3 5 28722.5 1180.4 1
14 -2 -11 3432.25 611.687 1
14 -2 -11 2800.93 563.427 2
14 -2 -8 22976.6 1331.58 1
14 -2 -5 1566.83 332.819 1
-2 -12 -2 30357.7 1290.72 3
14 -2 -2 31677.9 1312.5 1
14 -2 1 945.262 262.51 1
-2 -12 1 1020.56 226.752 3
-2 -12 4 54469.7 1559.08 3
14 -2 4 54770.3 1765.89 1
14 -1 -12 29010.1 1806.62 2
14 -1 -12 30479.4 1765.94 1
14 -1 -9 11631.7 1004.94 2
14 -1 -9 14146.4 1076.32 1
14 -1 -6 7646.16 705.066 1
-1 -13 -3 14935.9 923.405 3
14 -1 -3 14232.6 902.664 1
14 -1 0 19281 997.654 1
-1 -13 0 18301.4 935.679 3
14 -1 3 9592.54 680.73 1
-1 -13 3 9762.32 619.836 3
-1 -13 6 20199 828.855 3
14 0 -10 4697.5 654.093 1
14 0 -10 4162.42 654.927 2
14 0 -7 5036.46 614.204 1
14 0 -4 106907 2963.41 1
0 -14 -1 1606.98 316.927 3
14 0 -1 2351.62 399.059 1
14 0 2 50810.6 1790.12 1
0 -14 2 51502 1662.61 3
0 -14 5 7608.64 540.41 3
14 0 5 7830.4 655.462 1
14 1 -11 334.77 238.95 1
14 1 -11 54.8829 293.814 2
14 1 -8 14497.6 1070.3 1
14 1 -5 59168.5 2100.25 1
14 1 -2 2094.15 385.198 1
1 -15 -2 1011.61 286.676 3
1 -15 1 21079.2 1040.95 3
14 1 1 20339.3 1082.22 1
1 -15 4 44762.4 1532.32 3
14 1 4 46215.2 1732.85 1
14 2 -12 4358.39 733.743 2
14 2 -9 2852.45 516.74 1
14 2 -9 3522.14 620.107 2
14 2 -6 7768.54 748.117 1
14 2 -3 19181.5 1098.49 1
2 -16 -3 16719.6 1042.12 3
14 2 0 17569.6 1028.68 1
2 -16 0 18404.7 1011.23 3
14 2 3 1089.74 319.799 1
2 -16 3 1122.8 259.376 3
2 -16 6 30482.6 1222.81 3
14 3 -10 881.343 378.467 1
14 3 -10 327.096 284.92 2
14 3 -7 5926.47 685.684 1
14 3 -4 18237.7 1107.11 1
3 -17 -4 15522.9 1045.09 3
14 3 -1 2286.67 406.176 1
3 -17 -1 1948.71 382.673 3
14 3 2 5455.57 584.856 1
3 -17 2 4783.54 514.03 3
3 -17 5 1454.12 289.918 3
14 4 -11 -210.356 280.736 2
14 4 -11 -285.386 332.038 1
14 4 -8 9044.5 864.102 1
14 4 -5 -152.909 242.788 1
4 -18 -5 -29.147 258.995 3
14 4 -2 9475.39 798.194 1
4 -18 -2 9336.2 787.651 3
14 4 1 8661.23 752.636 1
4 -18 1 8387.54 705.887 3
4 -18 4 21689.3 1128.73 3
14 4 4 23769.5 1275.85 1
14 5 -9 1321.74 409.503 2
14 5 -9 2753.46 511.815 1
14 5 -6 9706.25 879.995 1
5 -19 -6 10234 915.314 3
14 5 -3 675.608 291.684 1
5 -19 -3 157.776 209.622 3
14 5 0 75440.7 2503.3 1
5 -19 0 72286.3 2411.13 3
5 -19 3 39239 1654.62 3
14 5 3 43829.3 1818.03 1
14 6 -10 320.914 307.101 2
14 6 -10 243.247 224.775 1
6 -20 -7 5271.01 709.406 3
14 6 -7 6440.35 741.71 1
14 6 -4 21892.5 1288.23 1
6 -20 -4 21479.2 1327.63 3
14 6 -1 7062.78 740.787 1
6 -20 -1 6802.5 701.128 3
14 6 2 406.345 236.313 1
6 -20 2 1164.51 308.256 3
14 7 -8 3747.89 605.418 1
14 7 -5 10712.9 918.203 1
7 -21 -5 10887.1 977.641 3
14 7 -2 3862.88 566.384 1
7 -21 -2 4115.46 596.022 3
14 7 1 15244.5 1061.71 1
7 -21 1 14337.5 1022.37 3
14 7 4 7018.78 757.772 1
14 8 -9 738.56 359.762 1
14 8 -9 -71.6957 314.392 2
14 8 -6 179.951 243.557 1
8 -22 -6 184.515 295.566 3
14 8 -3 1902.17 426.198 1
8 -22 -3 2728.99 516.64 3
14 8 0 11276 944.289 1
8 -22 0 12129.5 977.327 3
8 -22 3 15917.8 1098.98 3
14 8 3 15534.6 1138.38 1
14 9 -7 4858.55 710.033 1
14 9 -4 6789.72 786.625 1
9 -23 -4 7568.02 859.047 3
14 9 -1 5462.5 680.707 1
9 -23 -1 4594.93 645.546 3
9 -23 2 8069.8 815.875 3
14 9 2 8072.05 827.554 1
14 10 -8 6478.47 807.138 1
14 10 -8 6432.16 883.495 2
14 10 -5 70949.7 2719.62 1
10 -24 -5 72000.6 2853.68 3
14 10 -2 26004.3 1504.12 1
10 -24 -2 25559.2 1559.44 3
14 10 1 18298.7 1272.93 1
10 -24 1 16871.9 1224.61 3
14 11 -6 22841.1 1510.45 1
11 -25 -3 765.165 363.5 3
14 11 -3 1200.94 412.118 1
11 -25 0 7984.53 875.759 3
14 11 0 9260.09 928.188 1
14 12 -7 1212.53 449.016 1
14 12 -4 12.6983 254.183 1
14 12 -1 728.637 327.729 1
12 -26 -1 784.926 353.122 3
14 12 2 3481.01 601.811 1
12 -26 2 3431.21 585.525 3
14 13 -5 7241.93 860.549 1
14 13 -2 58.5618 246.364 1
14 13 1 -14.1798 323.459 1
14 14 -6 5276.42 765.822 1
14 14 -3 6804.85 843.936 1
14 14 0 1710.02 514.552 1
14 15 -4 615.328 313.04 1
14 15 -1 15174 1288.35 1
13 15 -5 334.52 251.229 1
13 15 -2 6300.91 824.895 1
12 15 -6 1170.66 363.142 1
12 15 -3 1907.39 461.147 1
12 15 0 -460.986 399.933 1
11 15 -7 1745.13 518.341 2
11 15 -4 10275.7 967.608 1
15 -26 -1 2628.49 561.483 3
11 15 -1 3331.41 581.365 1
10 15 -8 7510.42 948.598 2
10 15 -5 7382.23 795.996 1
10 15 -2 -550.988 337.223 1
15 -25 -2 -60.4431 264.214 3
9 15 -6 1346.42 369.994 1
9 15 -6 851.281 311.751 2
15 -24 -6 951.921 379.136 3
9 15 -3 1469.34 344.927 1
15 -24 -3 1614.01 421.225 3
9 15 0 14566.1 1101.33 1
8 15 -7 5897.89 783.347 2
15 -23 -7 5769.68 785.179 3
8 15 -4 4508.13 586.325 1
15 -23 -4 4861.39 680.459 3
8 15 -1 11724.1 964.613 1
7 15 -8 2447.55 519.455 2
15 -22 -8 3844.76 625.729 3
7 15 -5 2850.78 448.829 1
7 15 -5 2109.75 435.356 2
15 -22 -5 2677.43 535.816 3
7 15 -2 1387.64 363.516 1
-22 7 7 16184.6 1148.71 4
6 15 -9 5720.99 818.699 2
6 15 -6 4262.1 535.784 1
6 15 -6 4315.41 623.924 2
15 -21 -6 4035.83 613.648 3
6 15 -3 1190.25 335.593 1
-21 6 6 25062.9 1347.99 4
5 15 -10 4305.15 776.937 2
5 15 -7 114.166 261.005 2
15 -20 -7 885.678 328.459 3
5 15 -4 18242.8 1062.53 1
5 15 -1 10039.5 793.487 1
-20 5 5 2129.41 380.505 4
-20 5 8 5277.06 671.115 4
4 15 -8 13614.5 1168.11 2
15 -19 -8 12717.5 1004.6 3
4 15 -5 788.667 279.13 1
4 15 -5 1404.84 390.261 2
15 -19 -5 1298.69 370.508 3
4 15 -2 12369.4 847.365 1
-19 4 4 23583.4 1136.22 4
-19 4 7 1530.05 364.196 4
3 15 -9 1582.79 469.921 2
3 15 -6 25773.3 1437.75 2
15 -18 -6 27471.1 1437.95 3
3 15 -3 1495.23 299.629 1
-18 3 3 6.9179 139.409 4
-18 3 6 10083.5 813.514 4
-18 3 9 8706.65 874.449 4
2 15 -10 1885.04 461.222 2
2 15 -7 6004.13 731.732 2
15 -17 -7 8258.33 749.453 3
2 15 -4 5847.11 608.404 2
2 15 -4 6098.82 536.182 1
-17 2 2 7181.63 512.815 4
15 -17 2 7163.45 430.787 1
-17 2 5 573.424 227.085 4
-17 2 8 36449.1 1741.44 4
1 15 -11 4747.62 794.115 2
1 15 -8 81.4461 266.015 2
15 -16 -8 187.607 182.975 3
1 15 -5 55982.4 2065.63 2
1 15 -5 62140.1 1823.99 1
1 15 -2 1251.72 276.697 2
-16 1 1 23038.5 866.937 4
-16 1 4 17238.3 914.369 4
-16 1 7 2317.29 440.344 4
0 15 -9 16523.3 1292.98 2
0 15 -6 38189.9 1726.89 2
15 -15 -6 39438.8 1596.6 3
0 15 -3 44509 1611.32 2
-15 0 0 8322.88 431.871 4
-15 0 3 6432.25 522.694 4
15 -15 3 6948.33 371.971 1
-15 0 6 16322.4 1000.74 4
-15 0 9 5017.93 653.823 4
-1 15 -10 11881.8 1151.75 2
-1 15 -7 10652 926.459 2
15 -14 -7 11613.2 799.985 3
-1 15 -4 45458.2 1692.19 2
-1 15 -1 21081.5 922.905 2
-14 -1 -1 20926 624.308 4
15 -14 2 1785.64 224.464 1
-14 -1 2 1817.94 260.759 4
-14 -1 5 57964 1930.55 4
-14 -1 8 15635.2 1078.97 4
-2 15 -11 2461.08 565.056 2
-2 15 -8 5755.16 734.201 2
-2 15 -5 1675.33 359.761 2
-2 15 -2 417.223 178.387 2
-13 -2 -2 480.763 62.1731 4
15 -13 1 1048.23 188.176 1
-2 15 1 846.86 154.605 2
15 -13 4 24588.7 723.101 1
-13 -2 4 22391.6 1058.73 4
-13 -2 7 22361.2 1229.39 4
-13 -2 10 6930.6 775.391 4
-3 15 -12 3543.14 702.373 2
-3 15 -9 12386.2 1105.7 2
-3 15 -6 18597.7 1143.57 2
-3 15 -3 76447.1 2186.05 2
-3 15 0 29495.4 981.024 2
15 -12 0 27848 1078.86 1
15 -12 3 5467.8 372.852 1
-12 -3 6 6310.92 607.356 4
-12 -3 9 8021.43 809.539 4
-4 15 -10 992.207 427.337 2
-4 15 -7 41743.7 1853.88 2
15 -11 -7 40962.2 1434.59 3
-4 15 -4 35363.1 1432.26 2
-4 15 -1 7593.32 497.076 2
-4 15 2 13592.4 434.081 2
15 -11 2 13335.2 648.291 1
15 -11 5 10895 467.92 1
-11 -4 8 9403.61 821.629 4
-5 15 -11 539.901 353.614 2
15 -10 -8 5608.75 539.808 2
-5 15 -8 6202.92 750.477 2
-5 15 -5 78254.9 2423.87 2
-5 15 -2 24856.4 1013.04 2
-5 15 1 35267.5 914.701 2
15 -10 1 33161.1 1170.68 1
15 -10 4 57080.6 1484.91 1
-10 -5 10 2437.55 464.32 4
-6 15 -12 4068.03 736.995 2
-6 15 -9 3065.48 550.593 2
15 -9 -9 3376.66 453.096 2
-6 15 -6 6727.39 672.359 2
-6 15 -3 2605.57 357.71 2
-6 15 0 18616.1 688.101 2
15 -9 0 18538.1 873.702 1
15 -9 3 52434.2 1487.36 1
15 -8 -10 8748.24 779.004 2
-7 15 -10 6738.92 844.613 2
-7 15 -7 24666.6 1373.48 2
-7 15 -4 5729.91 552.279 2
15 -8 -1 6094.48 512.025 1
-7 15 -1 5751.37 415.31 2
15 -8 2 6099.57 469.589 1
15 -8 2 6318.15 348.101 4
15 -8 5 47894.2 1391.15 1
-8 15 -11 3928.26 698.276 2
-8 15 -8 8461.07 823.165 2
-8 15 -5 11215.4 798.439 2
15 -7 -2 6473.12 560.394 1
-8 15 -2 6250.28 480.826 2
15 -7 1 17290.8 839.991 1
15 -7 1 17495.1 632.639 4
15 -7 4 42318.1 1353.93 1
15 -6 -12 3938.83 680.466 1
-9 15 -12 2699.45 611.011 2
15 -6 -9 26988.7 1417.42 2
-9 15 -9 25552.1 1552.07 2
15 -6 -6 74471.2 2422.62 1
-9 15 -6 71593.9 2387.66 2
15 -6 -3 1272.91 307.633 1
-9 15 -3 854.44 226.514 2
15 -6 0 72188 2042.09 1
15 -6 3 80826.3 2124.45 1
15 -6 3 77660.9 1456.07 4
15 -5 -13 110.922 242.718 1
15 -5 -10 6206.24 760.097 1
15 -5 -10 6046.67 709.236 2
-10 15 -10 4279.5 693.363 2
15 -5 -7 40544 1752.88 1
-10 15 -7 36741.7 1714.62 2
15 -5 -4 9040.03 729.029 1
-10 15 -4 7953.42 641.042 2
15 -5 -1 2591.17 361.846 1
15 -5 2 46980.2 1541.71 1
15 -5 5 11688.2 705.319 1
15 -4 -11 3222.19 591.606 1
15 -4 -11 2351.02 516.325 2
15 -4 -8 7577.92 773.443 1
15 -4 -5 40374.5 1663.75 1
15 -4 -2 23566.9 1125.99 1
15 -4 1 64006.4 1945.61 1
15 -4 4 16381.3 863.149 1
15 -3 -12 15056.3 1263.73 2
15 -3 -12 12839.3 1161.89 1
15 -3 -9 13904.7 1068.23 2
15 -3 -9 13722.5 1080.23 1
15 -3 -6 1463.51 388.978 1
15 -3 -3 80541.2 2412.79 1
15 -3 0 15180.5 873.323 1
-3 -12 0 14021.1 816.963 3
15 -3 3 21825.1 1048.75 1
-3 -12 3 21209.8 924.274 3
15 -2 -13 2536.88 555.736 1
15 -2 -13 2920.26 636.675 2
15 -2 -10 1087.68 386.629 1
15 -2 -10 1161.43 350.028 2
15 -2 -7 27394.1 1444.44 1
15 -2 -4 55949 1984.51 1
15 -2 -1 66324.8 2083.45 1
-2 -13 -1 66248.6 2063.38 3
15 -2 2 44458.5 1611.84 1
-2 -13 2 42767.2 1468.98 3
-2 -13 5 149598 3268.35 3
15 -2 5 158922 3694.07 1
15 -1 -11 8733.92 949.866 2
15 -1 -11 10883.7 1042.23 1
15 -1 -8 7132.23 755.152 1
15 -1 -5 31092.4 1472.41 1
15 -1 -2 16828.5 994.595 1
-1 -14 -2 15651.1 949.913 3
15 -1 1 17256.9 964.895 1
-1 -14 1 15613.4 883.533 3
-1 -14 4 17741.3 870.776 3
15 -1 4 18879.2 1026.8 1
15 0 -12 1759.46 451.403 1
15 0 -12 2250.44 558.514 2
15 0 -9 6459.59 759.263 1
15 0 -9 4981.32 690.436 2
15 0 -6 16983.9 1112.19 1
15 0 -3 8861.29 772.818 1
0 -15 -3 8174.52 722.491 3
15 0 0 10297.7 776.912 1
0 -15 0 9490.41 706.231 3
15 0 3 44329.9 1663.45 1
0 -15 3 41369.4 1495.82 3
0 -15 6 37052 1298.71 3
15 1 -10 4526.03 651.234 1
15 1 -10 5112.9 734.542 2
15 1 -7 4199.7 584.805 1
15 1 -4 4318.99 559.046 1
1 -16 -4 4641.39 575.15 3
15 1 -1 3052.14 468.375 1
1 -16 -1 2740.91 424.328 3
15 1 2 2871.94 442.481 1
1 -16 2 3098.53 414.289 3
1 -16 5 17973.6 923.921 3
15 1 5 18214.6 1085.57 1
15 2 -11 -98.4943 308.49 1
15 2 -11 527.385 300.663 2
15 2 -8 15605.6 1148.31 1
15 2 -5 17512.2 1126.2 1
2 -17 -5 17535.8 1156.83 3
15 2 -2 27695.1 1357.6 1
2 -17 -2 23356.2 1253.82 3
15 2 1 1219.29 346.633 1
2 -17 1 371.644 214.016 3
15 2 4 1656.32 383.282 1
2 -17 4 1911.33 332.973 3
15 3 -9 5649.3 737.51 1
15 3 -9 5184.67 738.021 2
15 3 -6 9917.04 878.836 1
15 3 -3 29909.2 1471.82 1
3 -18 -3 27886.7 1440.69 3
15 3 0 17729.1 1096.72 1
3 -18 0 16699.4 1033.41 3
15 3 3 26706.9 1358.96 1
3 -18 3 26011 1254.82 3
3 -18 6 12406.3 805.626 3
15 4 -10 552.017 381.043 2
15 4 -10 683.999 299.872 1
15 4 -7 3351.6 552.951 1
4 -19 -4 483.93 246.926 3
15 4 -4 500.536 319.753 1
15 4 -1 41724.6 1767.03 1
4 -19 -1 38289.3 1690.45 3
15 4 2 11743.6 901.587 1
4 -19 2 12420.6 883.301 3
4 -19 5 613.81 247.193 3
15 5 -8 3739.49 613.649 1
5 -20 -5 806.105 306.971 3
15 5 -5 896.463 363.373 1
15 5 -2 30860.1 1542.06 1
5 -20 -2 28501.6 1494.86 3
15 5 1 12202.8 945.666 1
5 -20 1 8923.24 791.88 3
15 5 4 5316.98 651.836 1
5 -20 4 5325.93 586.987 3
15 6 -9 14216.8 1171.15 1
15 6 -9 11921.8 1176.24 2
15 6 -6 12894.4 1056.51 1
6 -21 -6 10481.1 1001.36 3
15 6 -3 8115.15 802.143 1
6 -21 -3 7804.86 805.802 3
15 6 0 51629.7 2082.23 1
6 -21 0 51792.5 2081.68 3
15 6 3 1695.64 417.728 1
6 -21 3 1301.51 341.72 3
6 -21 6 18080.1 1095.3 3
15 7 -7 -100.091 235.411 1
7 -22 -7 -177.619 288.374 3
15 7 -4 8421.73 853.559 1
7 -22 -4 7868.1 838.029 3
15 7 -1 11018.5 947.454 1
7 -22 -1 11686.4 973.509 3
7 -22 2 9749.84 860.754 3
15 7 2 9644.84 894.486 1
7 -22 5 14457.3 1029.58 3
15 8 -8 5721.95 761.172 1
15 8 -5 27655.2 1595.83 1
8 -23 -5 28066.9 1672.82 3
8 -23 -2 6105.12 743.021 3
15 8 -2 7216.34 786.52 1
15 8 1 4557.56 653.652 1
8 -23 1 4047.33 600.686 3
8 -23 4 1496.26 367.294 3
15 9 -9 14711.4 1221.48 1
15 9 -6 338.548 277.956 1
15 9 -3 17318.6 1267.22 1
9 -24 -3 17957 1320.5 3
15 9 0 4777.78 680.643 1
9 -24 0 5086.34 681.779 3
15 9 3 3120.81 562.137 1
9 -24 3 3208.86 524.979 3
15 10 -7 6968.15 856.946 1
15 10 -4 16790.5 1284.35 1
10 -25 -4 19999.7 1441.45 3
15 10 -1 567.328 274.626 1
10 -25 -1 336.534 233.323 3
15 10 2 7009.89 828.462 1
10 -25 2 6447.67 781.576 3
10 -25 5 311.135 207.936 3
15 11 -8 17588.1 1381.14 1
15 11 -5 19499.1 1421.49 1
15 11 -2 6775.47 812.777 1
11 -26 -2 8076.03 905.618 3
15 11 1 958.939 347.853 1
11 -26 1 1722.87 440.757 3
11 -26 4 10102.2 976.699 3
15 12 -6 14753.9 1246.28 1
15 12 -3 5302.77 757.548 1
15 12 0 577.051 330.829 1
15 13 -4 14629 1236.31 1
15 13 -1 8888.69 984.55 1
15 14 -5 216.983 295.598 1
15 14 -2 5447.43 802.952 1
15 14 1 3340.74 615.116 1
15 15 -3 4698.01 766.396 1
15 15 0 6994.8 921.192 1
14 16 -2 2706.76 593.509 1
13 16 -3 9284.35 1005.8 1
12 16 -4 6144.75 789.828 1
12 16 -1 6465.09 840.539 1
11 16 -5 3886.41 625.079 1
11 16 -2 5710.93 750.189 1
10 16 -6 244.239 357.956 2
10 16 -3 368.831 290.311 1
9 16 -7 7014.16 901.183 2
9 16 -4 3698.32 583.281 1
16 -25 -4 4527.22 707.429 3
9 16 -1 26130.3 1520.06 1
8 16 -8 6416.44 851.147 2
8 16 -5 2782.1 493.799 1
8 16 -5 1700.97 478.03 2
16 -24 -5 1966.12 518.168 3
8 16 -2 7640.52 792.719 1
7 16 -9 7582.65 959.936 2
7 16 -6 132.759 243.884 2
16 -23 -6 426.658 303.903 3
7 16 -3 22062.8 1290.24 1
6 16 -7 2356.38 520.096 2
16 -22 -7 3421.79 565.969 3
6 16 -4 1322.53 340.351 1
16 -22 -4 729.682 354.171 3
6 16 -1 10459.7 861.842 1
-22 6 5 7207.08 686.684 4
5 16 -8 5791.85 792.644 2
16 -21 -8 7744.54 828.689 3
5 16 -5 4216.05 586.102 2
5 16 -5 5186.01 586.354 1
16 -21 -5 5096.93 663.385 3
5 16 -2 10780.7 844.381 1
-21 5 4 11494.8 804.917 4
-21 5 7 2002.62 421.734 4
4 16 -9 12490.4 1194.29 2
4 16 -6 2204.81 470.757 2
16 -20 -6 3081 523.289 3
4 16 -3 3855.24 493.048 1
-20 4 3 7553.85 594.072 4
-20 4 6 3123.03 471.083 4
3 16 -10 4900.9 792.084 2
3 16 -7 2852.41 539.684 2
16 -19 -7 1917.57 424.178 3
3 16 -4 18215.2 1125.43 2
3 16 -4 18829.6 1026.86 1
-19 3 2 5473.41 456.011 4
-19 3 5 10031.2 774.142 4
-19 3 8 3278.38 550.135 4
2 16 -8 4630.79 679.924 2
2 16 -5 9999.72 844.371 2
2 16 -5 12221.5 777.327 1
-18 2 1 36302.3 1166.28 4
-18 2 4 11565.2 776.563 4
-18 2 7 7187.6 731.552 4
1 16 -9 27247.7 1725.52 2
1 16 -6 18375.8 1213.61 2
16 -17 -6 20818.3 1195.74 3
1 16 -3 19817.7 1076.29 2
-17 1 0 23160.4 783.385 4
-17 1 3 4215.91 436.639 4
-17 1 6 4014.55 513.3 4
-17 1 9 2483.23 484.251 4
0 16 -10 17249.5 1409.12 2
0 16 -7 1560.15 398.693 2
16 -16 -7 1874.49 369.944 3
0 16 -4 18359.9 1054.69 2
0 16 -1 13647 783.915 2
-16 0 2 33653.6 1187.55 4
16 -16 2 32826 1073.66 1
-16 0 5 9243.92 728.924 4
-16 0 8 841.804 297.021 4
-1 16 -11 1599 475.519 2
-1 16 -8 2035.8 448.415 2
-1 16 -5 17707 1096.29 2
-1 16 -2 2844.98 374.968 2
-15 -1 1 2780.99 287.986 4
16 -15 1 2893.43 316.641 1
-15 -1 4 5090.88 500.022 4
-15 -1 7 4603.03 563.461 4
-2 16 -9 9159.62 969.254 2
-2 16 -6 29962.3 1509.61 2
-2 16 -3 992.765 265.717 2
-2 16 0 18147.1 794.002 2
-14 -2 0 18537 698.692 4
16 -14 3 18268.8 700.66 1
-14 -2 3 16999.4 864.065 4
-14 -2 6 7539.12 687.492 4
-14 -2 9 4436.55 625.705 4
-3 16 -10 27162.1 1749.97 2
-3 16 -7 3182.02 517.766 2
16 -13 -7 3764.63 442.681 3
-3 16 -4 9698.69 743.131 2
-3 16 -1 23965.8 974.078 2
-3 16 2 6779.32 343.845 2
16 -13 2 6389.31 440.579 1
-13 -3 5 34415.4 1428.06 4
-13 -3 8 6189.65 691.817 4
-4 16 -11 4270.99 707.092 2
-4 16 -8 20296.3 1359.07 2
-4 16 -5 60686.8 2117.02 2
-4 16 -2 115.138 151.348 2
-4 16 1 10378 479.14 2
16 -12 1 12049.4 663.714 1
16 -12 4 21547 782.083 1
-12 -4 7 16396.1 1061.29 4
-12 -4 10 8524.84 876.074 4
-5 16 -12 15307.1 1400.41 2
-5 16 -9 8317.53 920.605 2
-5 16 -6 13955 995.454 2
-5 16 -3 10863.4 719.881 2
-5 16 0 10609.4 533.635 2
16 -11 0 10321.6 654.878 1
16 -11 3 24064.1 912.041 1
-11 -5 9 3383.15 543.516 4
-6 16 -10 1825.32 497.188 2
-6 16 -7 19317.1 1237.49 2
-6 16 -4 29600.1 1309.65 2
-6 16 -1 36192.7 1197.68 2
16 -10 -1 36537.2 1372.82 1
16 -10 2 2803 319.864 1
16 -10 5 61670.6 1595.85 1
-7 16 -11 4203.31 702.11 2
-7 16 -8 4430.73 612.684 2
-7 16 -5 31299.8 1432 2
16 -9 -2 1738.83 321.406 1
-7 16 -2 1912.45 280.186 2
16 -9 1 54166.3 1650.4 1
16 -9 4 168291 3518.62 1
-9 -7 10 3015.49 531.732 4
-8 16 -12 4165.97 743.945 2
-8 16 -9 3060.14 584.842 2
16 -8 -9 4957.46 578.406 2
-8 16 -6 6466.25 682.394 2
16 -8 -3 27473.5 1255.81 1
-8 16 -3 27629.7 1157 2
16 -8 0 24217.1 1058.99 1
16 -8 3 21364.4 937.224 1
-9 16 -10 4934.65 748.549 2
16 -7 -10 4644.18 607.244 2
-9 16 -7 646.974 264.998 2
16 -7 -7 437.871 263.608 1
16 -7 -4 148746 3672.99 1
-9 16 -4 143070 3516.6 2
16 -7 -1 87596.6 2420.23 1
16 -7 2 3427.5 388.6 1
16 -7 2 3809.74 245.379 4
16 -7 5 26940.9 1077.78 1
16 -6 -11 743.706 364.819 1
16 -6 -11 -51.6516 246.034 2
16 -6 -8 6820.32 751.437 1
-10 16 -8 7241.83 800.034 2
16 -6 -5 25562.4 1309.95 1
-10 16 -5 24658.4 1239.77 2
16 -6 -2 6158.21 573.752 1
16 -6 1 31028.7 1256.17 1
16 -6 4 26043 1096.41 1
16 -5 -12 602.179 367.865 1
16 -5 -9 10456.9 910.377 2
16 -5 -9 9517.13 917.667 1
16 -5 -6 49598.5 1964.26 1
-11 16 -6 48811.7 1912.69 2
16 -5 -3 933.983 293.176 1
16 -5 0 59778.8 1906.92 1
16 -5 3 2858.02 374.944 1
16 -4 -10 5477.37 743.836 1
16 -4 -10 5654.29 721.1 2
16 -4 -7 9371.77 841.585 1
16 -4 -4 21093.4 1171.01 1
16 -4 -1 36551.4 1466.38 1
16 -4 2 55621.7 1822.25 1
16 -4 5 19286.5 993.436 1
16 -3 -11 7017.97 840.03 2
16 -3 -11 8400.01 949.671 1
16 -3 -8 15469.3 1135.63 1
16 -3 -5 9450.19 790.408 1
16 -3 -2 557.779 220.959 1
16 -3 1 2054.63 368.933 1
-3 -13 1 2547.34 354.282 3
-3 -13 4 38428 1321.03 3
16 -3 4 39409.1 1509.72 1
16 -2 -12 3863.22 670.718 1
16 -2 -12 2366.19 538.94 2
16 -2 -9 841.977 332.292 1
16 -2 -9 1279 383.344 2
16 -2 -6 26695.1 1421.82 1
16 -2 -3 66211 2219.95 1
16 -2 0 7313.32 650.756 1
-2 -14 0 6127.28 564.102 3
16 -2 3 46744.2 1718.08 1
-2 -14 3 45886.9 1555.97 3
16 -1 -10 2567.77 530.993 1
16 -1 -10 2880.28 562.18 2
16 -1 -7 1831.83 392.315 1
16 -1 -4 18874.5 1140.06 1
16 -1 -1 24946.8 1252.62 1
-1 -15 -1 23646.7 1200.39 3
16 -1 2 1252.51 293.339 1
-1 -15 2 759.794 182.734 3
-1 -15 5 55821.4 1713.73 3
16 -1 5 56550.2 1989.52 1
16 0 -11 1478.93 459.992 1
16 0 -11 1118.58 439.993 2
16 0 -8 892.475 352.68 1
16 0 -5 8149.25 765.212 1
16 0 -2 32053.6 1491.86 1
0 -16 -2 31852.8 1466.68 3
16 0 1 13079 908.088 1
0 -16 1 11961.7 815.791 3
0 -16 4 16889.8 917.821 3
16 0 4 18023 1070.78 1
16 1 -12 2280.33 534.02 1
16 1 -9 896.114 361.573 1
16 1 -6 6674.63 733.626 1
16 1 -3 -30.0195 245.818 1
1 -17 -3 30.5121 218.293 3
16 1 0 7878.01 707.848 1
1 -17 0 7862.5 689.253 3
16 1 3 17436.2 1067.98 1
1 -17 3 18201.5 996.851 3
16 2 -10 227.688 259.934 1
16 2 -10 716.671 391.537 2
16 2 -7 1940.32 442.356 1
16 2 -4 21130.6 1261.66 1
2 -18 -4 20006.5 1252.15 3
16 2 -1 21977.1 1238.49 1
2 -18 -1 20281.6 1178.81 3
16 2 2 11638.2 885.989 1
2 -18 2 11148.6 821.603 3
16 2 5 33748.5 1584.87 1
2 -18 5 28867.5 1298.19 3
16 3 -11 349.558 302.131 1
16 3 -8 -310.414 309.238 1
16 3 -5 29037.5 1526.56 1
3 -19 -5 25276.8 1473.95 3
16 3 -2 5698.58 648.189 1
3 -19 -2 4082.64 570.62 3
16 3 1 4681.22 586.119 1
3 -19 1 4623.11 555.918 3
3 -19 4 17492 1032.3 3
16 3 4 17208.4 1137.75 1
16 4 -9 8487.27 919.692 1
16 4 -9 8843.97 1016.14 2
4 -20 -6 114.133 249.233 3
16 4 -6 206.348 251.214 1
16 4 -3 6323.57 693.796 1
4 -20 -3 6399.95 712.054 3
16 4 0 3525.74 556.664 1
4 -20 0 3543.19 522.566 3
4 -20 3 8802.59 761.136 3
16 4 3 8600.87 813.818 1
16 5 -10 1935.38 467.812 1
16 5 -7 13876.3 1138.48 1
16 5 -4 6117.2 725.149 1
5 -21 -4 5411 696.77 3
16 5 -1 7325.47 760.458 1
5 -21 -1 7178.62 751.578 3
16 5 2 272.933 224.864 1
5 -21 2 247.941 237.934 3
5 -21 5 1594.19 349.841 3
16 6 -8 3496.82 620.925 1
16 6 -5 2552.97 493.163 1
6 -22 -5 2249.54 501.737 3
16 6 -2 8341.42 836.305 1
6 -22 -2 7947.86 827.583 3
16 6 1 11421.8 965.511 1
6 -22 1 11651 962.29 3
16 6 4 8062.2 850.975 1
6 -22 4 10495 876.269 3
16 7 -9 569.439 363.149 1
16 7 -6 3340.92 588.652 1
7 -23 -6 3743.09 652.876 3
16 7 -3 6813.23 782.574 1
7 -23 -3 6411.84 783.581 3
16 7 0 5636.31 709.971 1
7 -23 0 5304.04 686.54 3
16 7 3 1945.86 453.944 1
7 -23 3 2787 487.978 3
16 8 -7 5908.63 793.675 1
16 8 -4 4816.15 727.375 1
8 -24 -4 3288.78 612.401 3
16 8 -1 3996.9 618.272 1
8 -24 -1 5338.77 710.802 3
16 8 2 4978.65 694.721 1
8 -24 2 4850.45 649.187 3
8 -24 5 775.396 302.386 3
16 9 -8 545.034 347.034 1
16 9 -5 7518.24 879.59 1
9 -25 -2 1856.03 453.771 3
16 9 -2 3003.37 569.829 1
9 -25 1 449.127 302.357 3
16 9 1 403.225 271.149 1
9 -25 4 1688.02 405.231 3
16 10 -6 3849.12 663.616 1
16 10 -3 15918.6 1267.74 1
10 -26 0 9878.24 983.963 3
16 10 0 8551.37 926.75 1
16 10 3 1799.83 469.879 1
10 -26 3 716.085 332.38 3
16 11 -7 3755.88 681.815 1
16 11 -4 27113.9 1715.71 1
16 11 -1 6318.05 818.291 1
16 11 2 -207.962 363.19 1
16 12 -5 -299.905 334.289 1
16 12 -2 557.534 367.443 1
16 12 1 7086.94 895.535 1
16 13 -3 23268.4 1629.37 1
16 13 0 12010.7 1169.53 1
16 14 -1 6703.27 904.094 1
13 17 -4 657.551 330.108 1
13 17 -1 2955.03 591.966 1
12 17 -2 1768.59 487.957 1
11 17 -3 1074.46 381.494 1
10 17 -4 2633.11 523.987 1
9 17 -5 6925.17 791.12 1
9 17 -5 8029.78 907.781 2
9 17 -2 1450.12 410.398 1
8 17 -6 4090.78 666.578 2
17 -25 -3 2072.34 496.279 3
8 17 -3 1259.99 383.101 1
7 17 -7 1425.8 458.999 2
7 17 -4 610.712 260.039 1
17 -24 -4 841.593 339.781 3
6 17 -8 10808.2 1104.22 2
6 17 -5 716.837 272.558 1
6 17 -5 911.745 363.881 2
17 -23 -5 909.178 372.696 3
6 17 -2 16419.9 1112.14 1
-23 6 7 3479.84 562.232 4
5 17 -9 8479.92 1008.13 2
5 17 -6 2464.75 522.869 2
17 -22 -6 1911.54 465.589 3
5 17 -3 1878.67 377.326 1
-22 5 6 1660.19 369.864 4
4 17 -7 830.634 365.016 2
17 -21 -7 189.151 189.643 3
4 17 -4 7027.79 735.548 2
4 17 -4 6788.01 656.197 1
-21 4 5 2208.22 390.206 4
-21 4 8 1061.79 310.647 4
3 17 -8 5096.45 754.264 2
3 17 -5 3010.44 516.74 2
17 -20 -5 1947.48 430.337 3
-20 3 4 55051.5 1881.31 4
-20 3 7 2159.4 426.751 4
2 17 -9 2153.44 527.982 2
2 17 -6 12143.2 1005.81 2
17 -19 -6 13357.5 1011.49 3
2 17 -3 54729.1 1992.26 2
-19 2 3 24131 1092.9 4
-19 2 6 1402.63 340.416 4
1 17 -10 908.923 395.99 2
1 17 -7 134.591 292.708 2
17 -18 -7 12.7914 203.069 3
1 17 -4 7253.89 704.537 2
-18 1 2 21838.3 948.988 4
-18 1 5 18252.6 1058.59 4
-18 1 8 8611 847.97 4
0 17 -8 2446.98 523.919 2
0 17 -5 5649.92 644.394 2
0 17 -2 15821 913.413 2
-17 0 1 6719.67 458.105 4
17 -17 1 6071.95 473.464 1
-17 0 4 20450.1 1045.89 4
-17 0 7 3975.55 549.929 4
-1 17 -9 3131.16 582.762 2
-1 17 -6 12445.3 984.027 2
-1 17 -3 17462.8 985.527 2
-1 17 0 8024.85 545.092 2
-16 -1 0 7716.63 430.893 4
-16 -1 3 125.071 141.061 4
-16 -1 6 5941.95 616.964 4
-16 -1 9 720.723 306.391 4
-2 17 -10 10752.2 1116.95 2
-2 17 -7 9989.89 924.227 2
17 -15 -7 9484.47 751.761 3
-2 17 -4 2577.04 431.327 2
-2 17 -1 505.011 163.413 2
-15 -2 2 24880.8 1024.92 4
17 -15 2 27152.1 990.069 1
-15 -2 5 19302.4 1064.31 4
-15 -2 8 18215.9 1212.05 4
-3 17 -11 12074.3 1233.04 2
-3 17 -8 3845.88 639.687 2
-3 17 -5 1272.81 320.933 2
-3 17 -2 4763.38 468.991 2
17 -14 1 1907.84 287.436 1
-3 17 1 2137.61 237.71 2
-14 -3 4 18477.6 981.762 4
-14 -3 7 6757.51 699.469 4
-4 17 -9 1893.55 521.001 2
-4 17 -6 21694.3 1273.88 2
-4 17 -3 15612.7 897.53 2
-4 17 0 29016.1 1007.69 2
17 -13 0 29423.4 1179.02 1
17 -13 3 26546.7 964.92 1
-13 -4 9 13489.1 1073.47 4
-5 17 -10 5926.2 824.099 2
-5 17 -7 8233.31 843.993 2
-5 17 -4 2513.68 407.516 2
-5 17 -1 29848.1 1098.53 2
17 -12 -1 30700.3 1248.93 1
17 -12 2 73223.7 1952.84 1
-12 -5 8 912.389 325.452 4
-6 17 -11 4643.81 792.577 2
-6 17 -8 9719.23 938.995 2
-6 17 -5 517.164 260.751 2
-6 17 -2 41636.7 1444.36 2
17 -11 -2 42986.4 1578.16 1
17 -11 1 66725.5 1904.02 1
-6 17 1 67947.7 1490.69 2
17 -11 4 27903.4 1023.89 1
-7 17 -9 5268.79 735.422 2
-7 17 -6 23351.7 1314.4 2
-7 17 -3 17157.6 926.354 2
17 -10 -3 16847.1 983.213 1
17 -10 0 45494.4 1542.92 1
-7 17 0 43414.9 1226.17 2
17 -10 3 173811 3713.47 1
-8 17 -10 7959.02 935.921 2
-8 17 -7 18476.5 1216.61 2
17 -9 -4 67903.9 2220.39 1
-8 17 -4 63656.6 2072.24 2
17 -9 -1 14295.1 851.588 1
-8 17 -1 14483.4 695.822 2
17 -9 2 29857.2 1184.7 1
17 -9 5 991.4 208.386 1
-9 17 -11 8031.2 992.613 2
17 -8 -11 9321.18 991.1 1
17 -8 -8 29387.1 1600.66 1
-9 17 -8 29296.8 1627.42 2
17 -8 -5 49613.6 1922.76 1
-9 17 -5 49362.6 1866.97 2
17 -8 -2 48803.3 1756.64 1
-9 17 -2 49378.5 1552.15 2
17 -8 1 11757.8 731.748 1
17 -8 4 124976 2945.44 1
17 -7 -12 16700.1 1367.17 1
17 -7 -9 6814.89 790.946 1
17 -7 -9 6219.42 697.634 2
-10 17 -9 6993.24 841.265 2
17 -7 -6 11107.6 893.553 1
-10 17 -6 12115.9 918.212 2
17 -7 -3 13931.8 911.199 1
-10 17 -3 13573.6 798.367 2
17 -7 0 12804.1 794.644 1
17 -7 3 23621.4 1068.85 1
17 -6 -10 1337.22 423.692 1
17 -6 -10 2500.27 486.723 2
17 -6 -7 3843.02 556.23 1
-11 17 -7 2359.92 452.044 2
17 -6 -4 14852.1 980.561 1
17 -6 -1 4209.41 492.814 1
17 -6 2 75819.9 2208.54 1
17 -6 5 26449.7 1157.59 1
17 -5 -11 9689.37 963.322 2
17 -5 -11 10794.3 1073.2 1
17 -5 -8 10128.6 943.289 1
17 -5 -5 1143.77 333.108 1
17 -5 -2 39644.1 1598.62 1
17 -5 1 105949 2819.82 1
17 -5 4 950.602 249.859 1
17 -4 -12 3886.47 708.746 1
17 -4 -12 2863.35 559.486 2
17 -4 -9 17169.1 1270.9 1
17 -4 -6 -178.992 259.603 1
17 -4 -3 1576.19 350.636 1
17 -4 0 1753.82 357.632 1
17 -4 3 73972 2266.58 1
17 -3 -10 2657.75 572.67 1
17 -3 -10 2678.41 548.479 2
17 -3 -7 2521.43 484.335 1
17 -3 -4 3607.11 506.668 1
17 -3 -1 17082.6 1019.8 1
17 -3 2 5537.27 565.29 1
-3 -14 2 5761.15 523.494 3
-3 -14 5 8678.32 577.172 3
17 -3 5 8426.66 700.119 1
17 -2 -11 17228.1 1365.88 2
17 -2 -11 19234.2 1436.73 1
17 -2 -8 34445.6 1776.19 1
17 -2 -5 479.929 251.356 1
17 -2 -2 7398.58 699.537 1
17 -2 1 4694.98 548.095 1
-2 -15 1 4130.23 479.965 3
-2 -15 4 6701.01 550.077 3
17 -2 4 5925.61 597.24 1
17 -1 -9 1592.25 437.776 1
17 -1 -6 2826.83 499.19 1
17 -1 -3 4074.58 535.783 1
17 -1 0 21433 1183.85 1
-1 -16 0 20572.5 1128.75 3
17 -1 3 21106.7 1169.04 1
-1 -16 3 21651.1 1074.85 3
17 0 -10 4494.76 685.852 1
17 0 -10 3741.51 658.604 2
17 0 -7 4515.77 639.717 1
17 0 -4 20784.2 1257.48 1
17 0 -1 6082.73 650.253 1
0 -17 -1 7121.24 688.951 3
17 0 2 15824.2 1044.27 1
0 -17 2 17735.5 1013.89 3
0 -17 5 6558.65 567.803 3
17 0 5 6666.67 682.384 1
17 1 -11 -136.779 321.703 1
17 1 -11 676.193 410.091 2
17 1 -8 16412.7 1238.3 1
17 1 -5 8401.69 817.077 1
17 1 -2 3346.97 497.678 1
1 -18 -2 4090.35 543.102 3
17 1 1 17859.2 1130.53 1
1 -18 1 17727.2 1061.98 3
1 -18 4 47881.8 1743.35 3
17 1 4 44319.4 1864.89 1
17 2 -9 10452.9 1042.68 1
17 2 -6 4282.67 627.078 1
2 -19 -3 1722.41 400.863 3
17 2 -3 636.874 287.347 1
17 2 0 30124.9 1527.94 1
2 -19 0 28028.6 1422.37 3
17 2 3 5611.18 648.706 1
2 -19 3 5153.63 570.585 3
17 3 -10 2041.86 524.223 2
17 3 -10 1923.12 466.289 1
17 3 -7 203.636 274.326 1
17 3 -4 7647.68 807.305 1
3 -20 -4 7690.13 814.182 3
17 3 -1 5426.25 653.36 1
3 -20 -1 5330.22 640.147 3
17 3 2 26829.3 1436 1
3 -20 2 23854.6 1297 3
17 3 5 26687.7 1480.73 1
3 -20 5 24581 1253.25 3
17 4 -8 936.884 355.858 1
4 -21 -5 5358.89 721.698 3
17 4 -5 5668.9 713.793 1
17 4 -2 22426.8 1358.48 1
4 -21 -2 20715.9 1311.38 3
17 4 1 11204.1 940.212 1
4 -21 1 9472.17 840.985 3
4 -21 4 10046.4 829.055 3
17 4 4 9606.04 905.052 1
17 5 -9 3256.29 651.949 2
17 5 -9 2585.72 558.603 1
17 5 -6 9284.6 924.036 1
5 -22 -6 8948.56 953.972 3
17 5 -3 2652.92 506.737 1
5 -22 -3 2492.5 492.48 3
17 5 0 8091.07 832.544 1
5 -22 0 8075.32 816.519 3
17 5 3 4464.35 655.122 1
5 -22 3 4457.29 588.58 3
17 6 -10 5878.43 860.878 1
17 6 -7 4170.96 659.849 1
17 6 -4 23284.5 1474.54 1
6 -23 -4 22943.5 1508.19 3
17 6 -1 14627.4 1144.58 1
6 -23 -1 14285 1111.55 3
17 6 2 6918.2 797.583 1
6 -23 2 5803.4 690.027 3
6 -23 5 761.193 273.341 3
17 7 -8 10819.6 1089.5 1
17 7 -5 5.47642 271.473 1
17 7 -2 662.784 356.392 1
7 -24 -2 114.3 251.77 3
17 7 1 11078.7 1018.81 1
7 -24 1 12467.6 1051.59 3
17 7 4 13642.2 1151.41 1
7 -24 4 13803.7 1074.94 3
17 8 -9 13738.3 1244.1 1
17 8 -6 4699.28 721.729 1
17 8 -3 13357.3 1154.07 1
8 -25 -3 13283.3 1162.11 3
17 8 0 4134.96 645.874 1
8 -25 0 4894.21 692.11 3
17 8 3 4791.09 712.495 1
8 -25 3 4480.36 639.33 3
17 9 -7 10323.6 1073.78 1
17 9 -4 19217.7 1448.64 1
17 9 -1 7788.91 884.106 1
9 -26 -1 7349.01 884.177 3
17 9 2 724.863 368.764 1
9 -26 2 410.132 298.881 3
9 -26 5 11089.5 996.398 3
17 10 -5 13608.3 1231.35 1
17 10 -2 3264.62 623.819 1
17 10 1 7813.98 910.185 1
17 11 -6 406.907 278.208 1
17 11 -3 1443.4 473.666 1
17 11 0 5203.76 778.413 1
17 12 -4 3.18731 253.797 1
17 12 -1 2521 591.919 1
17 12 2 -292.103 349.245 1
17 13 -2 1155.2 451.456 1
12 18 -3 1068.31 424.448 1
11 18 -4 506.34 266.551 1
10 18 -5 1613.11 457.157 2
10 18 -2 4829.47 701.451 1
9 18 -6 2932.91 608.816 2
9 18 -3 2450.97 506.212 1
8 18 -7 5471.29 798.408 2
8 18 -4 9024.4 934.487 2
8 18 -4 9824.46 913.175 1
7 18 -5 1630.58 451.818 2
6 18 -6 20645 1447.2 2
18 -24 -6 23230.8 1536.82 3
6 18 -3 3214.98 510.676 1
5 18 -7 1471.06 429.773 2
18 -23 -7 644.246 322.645 3
5 18 -4 736.538 326.832 2
5 18 -4 219.864 210.303 1
4 18 -8 13545.3 1225.46 2
4 18 -5 9888.65 920.525 2
18 -22 -5 9330.28 915.894 3
-22 4 7 11247.9 954.906 4
3 18 -9 1443.89 488.144 2
3 18 -6 1501.11 424.024 2
18 -21 -6 1423.04 397.75 3
3 18 -3 7303.85 729.427 2
-21 3 6 2008.01 403.496 4
2 18 -7 985.168 405.801 2
18 -20 -7 989.504 339.578 3
2 18 -4 12330.8 941.871 2
-20 2 5 864.3 281.59 4
-20 2 8 13024.4 1062.03 4
1 18 -8 4067.6 671.216 2
1 18 -5 29333.9 1531.07 2
1 18 -2 4323.92 505.55 2
18 -19 1 15795.8 806.923 1
-19 1 4 8942.49 693.526 4
-19 1 7 3889.16 558.299 4
0 18 -9 634.759 412.964 2
0 18 -6 1679.64 415.839 2
18 -18 -6 1972.84 399.994 3
0 18 -3 31794.5 1428.41 2
0 18 0 5009.64 475.425 2
-18 0 3 35095.2 1352.55 4
-18 0 6 2190.1 403.031 4
-1 18 -10 2911.38 618.438 2
-1 18 -7 1465.81 381.386 2
18 -17 -7 1914.19 368.428 3
-1 18 -4 46397.8 1832.69 2
-1 18 -1 18295.7 928.365 2
-17 -1 2 3852.76 392.782 4
18 -17 2 4437.27 384.085 1
-17 -1 5 6066.13 606.259 4
-17 -1 8 16895 1180.08 4
-2 18 -8 3077.05 566.7 2
-2 18 -5 28370.3 1455.23 2
-2 18 -2 10103.1 706.117 2
-16 -2 1 23357 915.472 4
18 -16 1 21841 977.63 1
-16 -2 4 18595.5 1011.96 4
-16 -2 7 2069.91 417.175 4
-3 18 -9 1029.16 447.47 2
-3 18 -6 11005.7 923.04 2
-3 18 -3 25876.7 1233.53 2
-3 18 0 18313.1 815.869 2
-15 -3 0 16743.2 701.076 4
18 -15 0 18165.6 922.747 1
-15 -3 3 25967.1 1138.46 4
-15 -3 6 8313.44 746.034 4
-15 -3 9 5133.57 697.741 4
-4 18 -10 3091.62 651.711 2
-4 18 -7 12712.8 1054.08 2
-4 18 -4 23221.6 1212.92 2
-4 18 -1 8678.76 590.658 2
18 -14 -1 8982.37 667.738 1
18 -14 2 8585.51 560.158 1
-14 -4 8 7930.41 793.504 4
-5 18 -11 1491.72 476.182 2
-5 18 -8 4121.21 660.198 2
-5 18 -5 24512.6 1322.3 2
-5 18 -2 4576.87 457.114 2
18 -13 -2 5559.49 553.99 1
18 -13 1 1365.43 251.529 1
-13 -5 7 1678.98 379.251 4
-6 18 -9 2410.51 524.98 2
-6 18 -6 40792.6 1828.76 2
-6 18 -3 3814.63 444.674 2
18 -12 -3 3577.44 478.946 1
-6 18 0 44366.3 1275.83 2
18 -12 0 41181.3 1502.77 1
18 -12 3 76834.5 2020.1 1
-12 -6 9 7007.65 776.719 4
-7 18 -10 4469.23 728.969 2
-7 18 -7 1491.18 389.225 2
-7 18 -4 389.194 201.13 2
18 -11 -4 844.742 293.106 1
18 -11 -1 63679.9 2007.03 1
-7 18 -1 61757.3 1729.99 2
18 -11 2 101028 2552.31 1
-8 18 -11 2267.17 581.851 2
-8 18 -8 15744.8 1201.32 2
18 -10 -5 33736.4 1580.91 1
-8 18 -5 32679.1 1513.43 2
18 -10 -2 59939.9 2011.1 1
-8 18 -2 57869.4 1762.75 2
18 -10 1 26760 1158.15 1
18 -10 4 13111.7 739.611 1
-9 18 -9 6425.35 801.64 2
18 -9 -9 5685.52 641.374 2
18 -9 -9 5019.45 708.75 1
18 -9 -6 4912.49 624.732 1
-9 18 -6 5438.34 632.933 2
18 -9 -3 17847.6 1056.43 1
-9 18 -3 16279.4 904.386 2
18 -9 0 30739.5 1304.34 1
18 -9 3 66544.1 1965.22 1
18 -8 -10 4454.5 684.376 1
-10 18 -10 4223.69 708.455 2
18 -8 -7 23288.9 1382.97 1
-10 18 -7 21264.1 1318.86 2
18 -8 -4 5188.47 603.344 1
-10 18 -4 4829.99 522.277 2
18 -8 -1 24024.9 1167.98 1
18 -8 2 31757.4 1287.59 1
18 -8 5 46189.7 1550.25 1
18 -7 -11 7029.14 899.303 1
18 -7 -8 24611.5 1475.86 1
-11 18 -8 25965.2 1536.61 2
18 -7 -5 68641.4 2403.05 1
-11 18 -5 67642.4 2274.54 2
18 -7 -2 31288.6 1408.52 1
18 -7 1 30362.7 1313.89 1
18 -7 4 12269 772.43 1
18 -6 -9 -453.601 327.025 1
18 -6 -6 5624.14 658.42 1
18 -6 -3 6989.71 681.682 1
18 -6 0 23972.6 1176.73 1
18 -6 3 65789.9 2079.06 1
18 -6 6 2694.55 380.387 1
18 -5 -10 4815.14 724.129 1
18 -5 -10 3408.63 583.916 2
18 -5 -7 168.796 244.982 1
18 -5 -4 19725.6 1178.71 1
18 -5 -1 1175.39 325.457 1
18 -5 2 2166.63 366.228 1
18 -5 5 20749.6 1087.64 1
18 -4 -11 -45.0884 322.47 1
18 -4 -11 805.823 392.847 2
18 -4 -8 3233.34 549.303 1
18 -4 -5 11540.4 930.107 1
18 -4 -2 20840 1166.61 1
18 -4 1 5035.5 553.871 1
18 -4 4 1533.37 325.583 1
18 -3 -12 3203.79 641.163 2
18 -3 -9 8490.56 925.151 1
18 -3 -6 9253.42 866.658 1
18 -3 -3 -380.401 302.93 1
18 -3 0 6241.07 637.824 1
-3 -15 3 1085.78 248.217 3
18 -3 3 1273.15 312.231 1
18 -2 -10 634.287 390.821 1
18 -2 -10 -240.205 353.066 2
18 -2 -7 6717.06 770.56 1
18 -2 -4 12810.4 984.936 1
18 -2 -1 37355.5 1654.26 1
-2 -16 -1 37791.6 1628.38 3
18 -2 2 27719.4 1375.05 1
-2 -16 2 28059.2 1284.47 3
-2 -16 5 10229.3 683.633 3
18 -2 5 11621.2 877.012 1
18 -1 -11 -201.141 285.854 1
18 -1 -11 97.2515 255.365 2
18 -1 -8 7670.43 850.557 1
18 -1 -5 19357.8 1250.81 1
18 -1 -2 22761.1 1305.74 1
-1 -17 -2 22517.9 1279.04 3
18 -1 1 21147.5 1215.5 1
-1 -17 1 19390.7 1107.48 3
-1 -17 4 7452.11 622.07 3
18 -1 4 6915.33 692.511 1
18 0 -9 2406.13 549.902 1
18 0 -6 1113.69 380.998 1
18 0 -3 35901.4 1699.42 1
0 -18 -3 33565.2 1649.27 3
18 0 0 6663.07 716.35 1
0 -18 0 5631.61 619.849 3
18 0 3 32676.7 1565.61 1
0 -18 3 33108.3 1453.47 3
18 1 -10 864.293 388.543 1
18 1 -10 659.583 391.267 2
18 1 -7 -46.2968 289.573 1
18 1 -4 15726.3 1142.03 1
18 1 -1 4830.32 626.27 1
1 -19 -1 6011.55 668.715 3
18 1 2 17317.9 1141.86 1
1 -19 2 16701.7 1047.35 3
18 1 5 1395.47 370.303 1
1 -19 5 1031.27 268.302 3
18 2 -8 1038.23 444.992 1
18 2 -5 1377.46 379.131 1
18 2 -2 3410.95 555.666 1
2 -20 -2 2603.2 489.404 3
18 2 1 9389.89 864.609 1
2 -20 1 9838.21 844.636 3
2 -20 4 11249.2 845.812 3
18 2 4 10152.8 906.292 1
18 3 -9 2031.56 522.377 1
18 3 -6 2606.76 549.629 1
18 3 -3 20460.5 1324.4 1
3 -21 -3 18574.1 1283.77 3
18 3 0 4367.45 631.796 1
3 -21 0 4200.15 577.262 3
18 3 3 3943.96 579.388 1
3 -21 3 4607.68 578.966 3
18 4 -10 2595.89 591.393 1
18 4 -7 4018.62 679.306 1
18 4 -4 21380.5 1395.46 1
4 -22 -4 19557.7 1362.59 3
18 4 -1 8736.41 875.854 1
4 -22 -1 9439.8 897.662 3
18 4 2 14294.3 1092.21 1
4 -22 2 13535.3 1022.25 3
4 -22 5 13206.3 966.063 3
18 5 -8 22277.1 1577.53 1
18 5 -5 580.756 317.105 1
5 -23 -5 958.001 381.317 3
18 5 -2 1767.1 460.406 1
5 -23 -2 1504.05 413.139 3
18 5 1 6975.75 785.775 1
5 -23 1 5535.5 693.985 3
5 -23 4 24405.2 1381.85 3
18 5 4 23980.7 1508.62 1
18 6 -9 3546.5 684.759 1
18 6 -6 15060.2 1266.84 1
18 6 -3 1108.08 411.717 1
6 -24 -3 719.889 333.813 3
18 6 0 7444.91 828.275 1
6 -24 0 7387.65 814.328 3
6 -24 3 11869.2 991.957 3
18 6 3 10477.5 1001.27 1
18 7 -7 9073.08 1011.29 1
18 7 -4 4299.69 696.881 1
18 7 -1 9432.93 959.882 1
7 -25 -1 8360.08 903.943 3
18 7 2 5921.38 774.016 1
7 -25 2 5068.99 687.5 3
7 -25 5 4475.51 631.3 3
18 8 -5 14812.9 1283.03 1
18 8 -2 21093.8 1487.14 1
18 8 1 574.861 330.853 1
8 -26 1 2347.32 506.269 3
8 -26 4 6622.11 780.262 3
18 9 -6 5084.85 756.396 1
18 9 -3 6164.47 820.625 1
18 9 0 2314.1 553.738 1
18 9 3 1679.69 503.681 1
18 10 -4 2472.36 553.869 1
18 10 -1 613.131 372.538 1
18 10 2 5064.07 816.239 1
18 11 -2 2903.11 601.932 1
18 11 1 3822.85 710.894 1
9 19 -4 -315.349 275.823 2
8 19 -5 1133.95 387.634 2
7 19 -6 7377.61 880.883 2
6 19 -7 6078.68 830.738 2
6 19 -4 1946.03 460.567 2
5 19 -8 2243.35 570.38 2
5 19 -5 2421.84 492.394 2
19 -24 -5 3620.37 624.388 3
4 19 -6 2298.09 509.549 2
19 -23 -6 3998.02 637.235 3
4 19 -3 7883.03 786.347 2
-23 4 6 10305.4 885.243 4
3 19 -7 1375.6 441.484 2
19 -22 -7 1576.62 436.81 3
3 19 -4 8332.76 813.086 2
-22 3 5 9049.52 763.114 4
2 19 -8 2991.33 591.492 2
2 19 -5 3709.44 578.264 2
2 19 -2 13718.7 940.041 2
-21 2 7 2364.02 460.953 4
1 19 -9 -18.1356 347.413 2
1 19 -6 11124.4 990.353 2
19 -20 -6 12469.5 1010.88 3
1 19 -3 15389.6 1015.33 2
-20 1 6 446.996 234.533 4
0 19 -10 5641.68 881.853 2
0 19 -7 463.846 351.317 2
19 -19 -7 835.022 277.685 3
0 19 -4 1802.76 377.682 2
0 19 -1 10582.2 742.456 2
-19 0 5 8230.75 724.5 4
-19 0 8 3860.68 578.388 4
-1 19 -8 4147.67 670.13 2
-1 19 -5 1158.2 333.26 2
-1 19 -2 16339.2 950.999 2
19 -18 1 5283.01 477.887 1
-18 -1 4 15025.3 917.483 4
-18 -1 7 -18.7733 155.087 4
-2 19 -9 14440.3 1279.08 2
-2 19 -6 15891.7 1161.1 2
-2 19 -3 4841.48 544.086 2
19 -17 0 26933.1 1183.04 1
-17 -2 3 887.95 232.23 4
-17 -2 6 5065.5 590.933 4
-3 19 -10 3390.9 703.686 2
-3 19 -7 7653.75 838.218 2
-3 19 -4 16105.5 1036.21 2
-3 19 -1 5360.33 488.711 2
19 -16 -1 4896 513.9 1
-16 -3 2 3777.17 398.348 4
19 -16 2 4544.45 412.03 1
-16 -3 5 24514.6 1251.17 4
-16 -3 8 233.352 208.143 4
-4 19 -8 11231 1054.64 2
-4 19 -5 1208.88 360.183 2
-4 19 -2 12094.2 773.638 2
19 -15 1 40280.9 1433.85 1
-15 -4 4 205.139 147.453 4
-15 -4 7 3545.72 533.441 4
-5 19 -9 24532.7 1651.95 2
-5 19 -6 10903.1 931.871 2
-5 19 -3 40121.2 1571.43 2
19 -14 0 75459.9 2210.15 1
19 -14 3 563.583 178.143 1
-6 19 -10 5473.93 802.389 2
-6 19 -7 6290.67 744.519 2
-6 19 -4 50919.7 1907.74 2
-6 19 -1 19819.6 904.854 2
19 -13 -1 21390.1 1093.6 1
19 -13 2 7976.91 581.99 1
-13 -6 8 4006.57 578.446 4
-7 19 -11 1779.27 524.385 2
-7 19 -8 2818.37 552.587 2
-7 19 -5 24407.9 1314.83 2
-7 19 -2 9925.83 665.299 2
19 -12 -2 9629.89 748.272 1
19 -12 1 1455.84 279.661 1
19 -12 4 25372.4 1031.74 1
-8 19 -9 1519.05 433.504 2
-8 19 -6 10626 889.054 2
19 -11 -3 14133.5 949.687 1
-8 19 -3 12283.8 799.604 2
19 -11 0 11548.8 771.63 1
19 -11 3 15004.8 814.041 1
-9 19 -10 1857.08 497.579 2
19 -10 -10 1514.46 469.633 1
19 -10 -7 27360.8 1540.74 1
-9 19 -7 25736.7 1496.84 2
19 -10 -4 14358.5 1005.28 1
-9 19 -4 15723.4 963.02 2
19 -10 -1 17950.2 1015.17 1
-9 19 -1 17084.2 784.354 2
19 -10 2 36182 1407.01 1
19 -10 5 23033.1 1002.68 1
19 -9 -11 3603.73 681.203 1
-10 19 -11 1734.92 485.756 2
19 -9 -8 19796.2 1356.87 1
-10 19 -8 19890.4 1357.98 2
19 -9 -5 3028.79 515.193 1
-10 19 -5 3062.32 469.772 2
19 -9 -2 62437.3 2119.39 1
19 -9 1 71595.6 2178.87 1
19 -9 4 24124.9 1093.56 1
19 -8 -9 2168.38 496.79 1
19 -8 -9 1543.84 376.337 2
-11 19 -9 1827.97 490.96 2
19 -8 -6 342.555 263.727 1
-11 19 -6 450.595 233.741 2
19 -8 -3 14089.7 970.401 1
19 -8 0 8557.47 686.832 1
19 -8 3 20844.4 1059.3 1
19 -7 -10 3386.22 636.618 1
19 -7 -10 3912.86 600.641 2
19 -7 -7 322.925 311.889 1
19 -7 -4 33422.1 1585.24 1
19 -7 -1 26466.7 1289.3 1
19 -7 2 36775.6 1494.29 1
19 -7 5 13800.5 850.084 1
19 -6 -11 2263 578.513 1
19 -6 -8 12780 1100.49 1
19 -6 -5 14051.9 1044.07 1
19 -6 -2 15477.8 1016.05 1
19 -6 1 72753.5 2313.32 1
19 -6 4 72830.5 2263.62 1
19 -5 -9 -101.08 303.882 1
19 -5 -6 6758.82 751.467 1
19 -5 -3 25453.1 1353.69 1
19 -5 0 7399.38 700.979 1
19 -5 3 4599.8 533.561 1
19 -5 6 41324.8 1646.51 1
19 -4 -10 6411.81 841.107 1
19 -4 -10 6845.54 841.48 2
19 -4 -7 1416.51 455.501 1
19 -4 -4 23031.8 1336.11 1
19 -4 -1 19086.2 1145.84 1
19 -4 2 13045.9 926.194 1
19 -4 5 1212.9 324.076 1
19 -3 -11 6403.36 867.475 1
19 -3 -11 5470.44 783.886 2
19 -3 -8 2711.74 532.434 1
19 -3 -5 10419.2 911.262 1
19 -3 -2 4854.41 606.298 1
19 -3 1 11629.2 902.555 1
-3 -16 4 19066.4 993.893 3
19 -3 4 20868.6 1174.47 1
19 -2 -9 -218.925 290.076 1
19 -2 -6 1114.38 338.39 1
19 -2 -3 24717.4 1383.43 1
19 -2 0 7703.13 737.137 1
-2 -17 0 7269.67 685.39 3
19 -2 3 59024.7 2136.59 1
-2 -17 3 54017.5 1907.22 3
19 -1 -10 2044.68 523.064 1
19 -1 -10 1296.05 448.081 2
19 -1 -7 4287.06 650.897 1
19 -1 -4 9932 899.138 1
19 -1 -1 14530.3 1045.9 1
-1 -18 -1 13833.2 1003.56 3
19 -1 2 3795.6 552.045 1
-1 -18 2 4004.74 510.703 3
19 -1 5 31454.3 1569.48 1
19 0 -8 4263.51 684.925 1
19 0 -5 8322.43 860.401 1
19 0 -2 5631.3 672.997 1
0 -19 -2 5528.61 662.329 3
19 0 1 11668.6 942.893 1
0 -19 1 10623.3 853.855 3
19 0 4 1130.52 342.907 1
0 -19 4 2409.6 389.277 3
19 1 -9 14677.8 1267.42 1
19 1 -6 6306.41 771.339 1
19 1 -3 9526.13 900.187 1
1 -20 -3 10089.9 933.913 3
19 1 0 10724.3 939.647 1
1 -20 0 10653.6 897.071 3
19 1 3 6165.66 708.898 1
1 -20 3 5205.13 593.271 3
19 2 -7 9253.56 985.541 1
2 -21 -4 6086.23 760.142 3
19 2 -4 6538.66 781.361 1
19 2 -1 9371.49 884.287 1
2 -21 -1 9321.17 869.59 3
19 2 2 11743.8 1000.83 1
2 -21 2 14068.3 1018.46 3
19 2 5 6397.94 763.291 1
19 3 -8 2857.69 599.878 1
19 3 -5 1695.02 454.531 1
19 3 -2 11649.1 1015.19 1
3 -22 -2 8464.83 873.011 3
19 3 1 33722.8 1737.71 1
3 -22 1 31271.9 1627.93 3
19 3 4 4324.17 619.367 1
3 -22 4 4840.97 591.052 3
19 4 -9 5782.52 822.712 1
19 4 -6 468.31 298.956 1
19 4 -3 9708.49 964.255 1
4 -23 -3 10698.1 1014.53 3
4 -23 0 6751.58 768.801 3
19 4 0 6153.94 763.735 1
4 -23 3 2044.95 418.083 3
19 4 3 2601.42 526.466 1
19 5 -7 4408.79 739.82 1
19 5 -4 3200.67 604.27 1
19 5 -1 4114.17 691.454 1
5 -24 -1 4727.44 675.381 3
19 5 2 2271.88 534.941 1
5 -24 2 2100.13 448.951 3
19 6 -8 8625.55 1001.56 1
19 6 -5 22415.6 1565.2 1
19 6 -2 13001.1 1155.53 1
6 -25 -2 11940.3 1097.2 3
19 6 1 11191.1 1054.67 1
6 -25 1 13969.2 1145.91 3
19 6 4 4327.92 683.623 1
6 -25 4 5466.03 681.844 3
19 7 -6 -105.386 263.336 1
19 7 -3 3405.22 639.697 1
19 7 0 23671.4 1567.03 1
7 -26 0 22663.4 1514.17 3
19 7 3 7041.64 907.866 1
7 -26 3 7248.36 819.145 3
19 8 -4 10780.4 1127.69 1
19 8 -1 566.693 366.975 1
19 8 2 1723.45 501.541 1
19 9 -5 9589.48 1091.37 1
19 9 -2 3967.97 689.524 1
19 9 1 1692.86 511.182 1
19 10 -3 420.215 320.433 1
19 10 0 19717.6 1532.65 1
10 20 -4 1771.7 500.131 2
8 20 -3 5279.74 728.785 2
7 20 -4 400.979 249.871 2
6 20 -5 4558.08 689.197 2
5 20 -6 3538.68 627.513 2
5 20 -3 6944.86 772.301 2
4 20 -7 1414.48 432.4 2
4 20 -4 1644.74 407.206 2
3 20 -8 4893.42 779.865 2
3 20 -5 2224.65 472.466 2
20 -23 -5 2928.24 547.904 3
3 20 -2 4710.91 593.244 2
-23 3 7 11955.1 993.985 4
2 20 -6 697.47 340.849 2
20 -22 -6 500.773 277.571 3
2 20 -3 9033.47 813.25 2
-22 2 6 3483.97 515.727 4
1 20 -7 -492.75 370.324 2
1 20 -4 8562.83 815.249 2
-21 1 5 12436.7 904.862 4
0 20 -8 11033.2 1109.53 2
0 20 -5 10668.4 942.872 2
0 20 -2 30246.2 1391.11 2
-20 0 4 6377.26 599.302 4
-20 0 7 9774.1 884.146 4
-1 20 -9 13392.8 1245.72 2
-1 20 -6 1050.98 349.851 2
-1 20 -3 5762.65 616.147 2
20 -19 0 10357.7 727.098 1
-19 -1 6 4584.7 582.042 4
-2 20 -10 11539.4 1222.89 2
-2 20 -7 2859.95 547.406 2
-2 20 -4 12200.2 922.395 2
-2 20 -1 8981.3 655.921 2
-18 -2 5 1207.72 299.361 4
-18 -2 8 1272.04 363.378 4
-3 20 -8 8416.81 940.38 2
-3 20 -5 23612.4 1363.76 2
-3 20 -2 24793.5 1186.04 2
20 -17 1 6123.44 523.925 1
-17 -3 4 6492.35 604.019 4
-17 -3 7 814.417 297.954 4
-4 20 -9 6131.91 845.755 2
-4 20 -6 6320.23 730.398 2
-4 20 -3 7465.11 660.494 2
20 -16 0 3364.6 436.268 1
-16 -4 3 6794.02 585.964 4
-16 -4 6 546.937 253.344 4
-5 20 -10 512.095 357.62 2
-5 20 -7 11482.2 1034.5 2
-5 20 -4 4559.28 557.502 2
-5 20 -1 8479.93 595.397 2
20 -15 -1 8970.66 708.869 1
20 -15 2 29414 1177.57 1
-15 -5 8 3692.47 571.262 4
-6 20 -8 3320.47 613.769 2
-6 20 -5 13356.4 992.534 2
20 -14 -2 1513.1 323.341 1
-6 20 -2 1198.82 262.84 2
20 -14 1 6431.72 558.766 1
-14 -6 7 5640.99 668.913 4
-7 20 -9 217.698 245.488 2
-7 20 -6 1468.27 379.228 2
-7 20 -3 24453.9 1203.65 2
20 -13 -3 26905.6 1348.22 1
20 -13 0 5650.38 559.589 1
20 -13 3 1896.39 285.286 1
-8 20 -10 3977.99 716.916 2
-8 20 -7 4446.27 622.158 2
20 -12 -4 3969.52 548.569 1
-8 20 -4 3195.77 454.075 2
20 -12 -1 2414.37 384.462 1
20 -12 2 30980.3 1286.03 1
20 -11 -8 2436.47 545.963 1
-9 20 -8 2030.97 466.786 2
20 -11 -5 19525.3 1220.64 1
-9 20 -5 16093.6 1070.88 2
20 -11 -2 26769.1 1324.08 1
-9 20 -2 26122.6 1118.08 2
20 -11 1 23902.2 1149.55 1
20 -11 4 75923.3 2162.69 1
20 -10 -9 6007.01 796.85 1
-10 20 -9 5369.42 783.801 2
20 -10 -6 4739.32 629.288 1
-10 20 -6 4146.6 579.428 2
20 -10 -3 9549.88 817.398 1
-10 20 -3 7331.78 624.062 2
20 -10 0 37783.9 1543.55 1
20 -10 3 47589.3 1674.07 1
20 -9 -10 1944.44 509.387 1
-11 20 -10 1546.99 456.023 2
20 -9 -7 1873.09 444.374 1
-11 20 -7 858.614 335.405 2
20 -9 -4 714.612 287.825 1
-11 20 -4 1136.92 289.257 2
20 -9 -1 3760.9 510.861 1
20 -9 2 3488.78 434.358 1
20 -9 5 18436.2 968.616 1
20 -8 -8 12109.4 1093.62 1
20 -8 -5 29454.8 1552.7 1
20 -8 -2 20102.5 1154.49 1
20 -8 1 2140.93 354.826 1
20 -8 4 7587.52 649.45 1
20 -7 -9 8848.1 971.777 1
20 -7 -6 11663.2 1005.01 1
20 -7 -3 954.844 320.804 1
20 -7 0 14367.1 956.091 1
20 -7 3 40205.5 1625.86 1
20 -7 6 4336.68 482.556 1
20 -6 -10 21346.3 1457.95 2
20 -6 -10 19652.9 1489.07 1
20 -6 -7 1577.93 464.718 1
20 -6 -4 76919.3 2648.74 1
20 -6 -1 16201.9 1057.33 1
20 -6 2 65221.4 2207.99 1
20 -6 5 2877.44 437.667 1
20 -5 -11 26907.5 1705.9 2
20 -5 -8 4830.05 709.85 1
20 -5 -5 3397.56 555.141 1
20 -5 -2 6467.33 703.101 1
20 -5 1 10380.3 840.338 1
20 -5 4 18404.3 1095.78 1
20 -4 -9 1265.62 436.202 1
20 -4 -6 3563.07 571.649 1
20 -4 -3 8065.34 778.519 1
20 -4 0 8760.78 785.611 1
20 -4 3 3868.41 522.335 1
20 -4 6 2754.42 465.477 1
20 -3 -10 2993.46 627.936 1
20 -3 -10 2545.08 550.493 2
20 -3 -7 1527.69 430.865 1
20 -3 -4 56751.7 2279.59 1
20 -3 -1 535.384 284.996 1
20 -3 2 9416.83 834.472 1
20 -3 5 2280.65 425.899 1
20 -2 -8 11463.9 1100.86 1
20 -2 -5 1204.19 407.927 1
20 -2 -2 1112.08 371.007 1
20 -2 1 22678.2 1322.07 1
-2 -18 1 19969.5 1176.38 3
-2 -18 4 12666.9 852.348 3
20 -2 4 12339.3 953.706 1
20 -1 -9 157.478 277.398 1
20 -1 -6 24.0063 284.516 1
20 -1 -3 38156.2 1852.07 1
20 -1 0 13634.4 1039.39 1
-1 -19 0 10875.3 894.339 3
20 -1 3 16232.6 1126.95 1
-1 -19 3 16262.2 1028.97 3
20 0 -7 10200.5 1028.65 1
20 0 -4 8814.06 917.485 1
20 0 -1 2061.73 462.73 1
0 -20 -1 1779.71 408.143 3
20 0 2 32054.3 1654.19 1
0 -20 2 32027.4 1542.33 3
20 0 5 12141.1 1016.25 1
20 1 -8 1214.99 458.012 1
20 1 -5 4105.11 643.069 1
20 1 -2 -87.2738 250.809 1
1 -21 -2 273.733 254.821 3
20 1 1 4163.22 630.232 1
1 -21 1 4058.61 567.98 3
1 -21 4 13553.3 966.058 3
20 1 4 13193.1 1080.72 1
20 2 -9 3562.35 687.751 1
20 2 -6 4792.91 745.088 1
20 2 -3 4393.78 667.254 1
2 -22 -3 4670.16 671.704 3
20 2 0 424.533 284.636 1
2 -22 0 119.667 206.535 3
20 2 3 1451.7 423.738 1
2 -22 3 1772.67 380.339 3
20 3 -7 12135.3 1165.75 1
20 3 -4 702.152 328.816 1
3 -23 -4 566.081 297.93 3
20 3 -1 11630.5 1051.5 1
3 -23 -1 10614.5 984.408 3
20 3 2 2815.25 556.776 1
3 -23 2 2487.34 482.236 3
20 3 5 10864.7 1036.3 1
20 4 -8 5747.56 836.275 1
20 4 -5 16320 1330.13 1
20 4 -2 5835.05 770.501 1
4 -24 -2 5828.55 760.542 3
20 4 1 11084.3 1037.89 1
4 -24 1 10892.5 990.208 3
4 -24 4 16062.1 1152.27 3
20 4 4 17307.2 1321 1
20 5 -6 4312.56 733.635 1
20 5 -3 3914.5 673.587 1
20 5 0 677.449 381.369 1
5 -25 0 223.684 245.02 3
5 -25 3 13221.5 1075.94 3
20 5 3 13714.7 1202.79 1
20 6 -4 5982.75 844.879 1
20 6 -1 1708.83 467.627 1
6 -26 2 2556.79 514.32 3
20 6 2 1938.25 534.046 1
20 7 -5 15972.4 1374.34 1
20 7 -2 10576.5 1107.45 1
20 7 1 3855.81 697.727 1
20 8 -3 4382.58 742.405 1
20 8 0 9358.11 1057.93 1
20 8 3 2222.96 546.509 1
20 9 -1 8470.76 1019.83 1
20 9 2 6725.76 915.972 1
8 21 -4 -31.32 224.347 2
7 21 -5 820.132 357.673 2
6 21 -6 28.0422 300.709 2
6 21 -3 2672.89 507.687 2
5 21 -7 7422.45 934.867 2
5 21 -4 2681.02 515.969 2
4 21 -5 4212.14 643.634 2
3 21 -6 1926.93 448.159 2
3 21 -3 2604.62 464.217 2
2 21 -7 683.297 329.197 2
2 21 -4 816.943 322.597 2
1 21 -8 -6.53452 252.68 2
1 21 -5 1924.45 424.564 2
-22 1 7 4004.16 592.997 4
0 21 -9 9281.97 1061.78 2
0 21 -6 9845.46 972.352 2
21 -21 -6 11151.3 981.733 3
0 21 -3 9145.27 804.258 2
-21 0 6 2946.79 477.711 4
-1 21 -7 7074.27 848.466 2
-1 21 -4 11367.3 926.891 2
-20 -1 5 4287.43 541.941 4
-2 21 -8 13671.6 1221.32 2
-2 21 -5 6890.04 756.215 2
-2 21 -2 13955.7 908.47 2
-19 -2 4 6028.45 594.378 4
-19 -2 7 9131.25 857.992 4
-3 21 -9 1890.94 563.26 2
-3 21 -6 3802.6 607.184 2
-3 21 -3 4095.19 513.119 2
21 -18 0 3661.59 459.159 1
-18 -3 3 19993.9 1036.31 4
-18 -3 6 3113.61 479.698 4
-4 21 -10 801.903 415.875 2
-4 21 -7 34636.3 1873.19 2
-4 21 -4 9737.17 822.565 2
21 -17 -1 10557.8 793.373 1
-17 -4 5 5533.8 596.558 4
-17 -4 8 1023.17 346.777 4
-5 21 -8 7658.93 911.764 2
-5 21 -5 1727.22 396.459 2
21 -16 -2 636.137 240.886 1
-5 21 -2 356.575 165.816 2
21 -16 1 6999.28 589.166 1
-16 -5 4 5314.71 563.458 4
-16 -5 7 12532.1 1010.4 4
-6 21 -9 4734.84 741.461 2
-6 21 -6 16808.1 1197.79 2
21 -15 -3 1523.53 362.318 1
-6 21 -3 1373.98 303.594 2
21 -15 0 50901.1 1811.04 1
-15 -6 6 11253.3 904.405 4
-7 21 -10 2395.18 576.332 2
-7 21 -7 1708.32 438.752 2
-7 21 -4 6213.02 639.013 2
21 -14 -4 6010.45 679.14 1
21 -14 -1 14711.2 951.746 1
21 -14 2 3878.29 439.975 1
-14 -7 8 3348.74 544.961 4
-8 21 -8 4161.92 643.408 2
21 -13 -8 4691.36 704.366 1
21 -13 -5 3296.4 555.691 1
-8 21 -5 3378.67 498.643 2
21 -13 -2 10629.1 847.342 1
-8 21 -2 11712.8 741.423 2
21 -13 1 4553.4 497.7 1
21 -12 -9 2381.68 531.828 1
-9 21 -9 4045.6 705.742 2
21 -12 -6 9094.64 892.043 1
-9 21 -6 7364.09 788.252 2
21 -12 -3 20377.1 1218.25 1
-9 21 -3 20302.2 1074.81 2
21 -12 0 75084.2 2346.13 1
21 -12 3 12329.9 780.293 1
21 -11 -10 10540.1 1093.09 1
-10 21 -10 9965.55 1081.49 2
21 -11 -7 4459.3 673.729 1
-10 21 -7 3551.86 573.187 2
21 -11 -4 7326.25 747.779 1
-10 21 -4 7473.76 682.453 2
21 -11 -1 9907.05 795.924 1
21 -11 2 2570.16 395.466 1
21 -10 -8 5725.54 759.409 1
-11 21 -8 5537.38 747.81 2
21 -10 -5 96104.1 3098.02 1
-11 21 -5 90810.6 2860 2
21 -10 -2 2656.32 427.675 1
21 -10 1 13725.3 904.435 1
21 -10 4 26832.3 1236.1 1
21 -9 -9 10290.7 1063.02 1
21 -9 -6 -39.7384 289.294 1
21 -9 -3 29723.8 1508.32 1
21 -9 0 7022.87 666.519 1
21 -9 3 21984.4 1159.93 1
21 -8 -10 762.184 379.325 1
21 -8 -7 4667.02 682.893 1
21 -8 -4 7659.99 796.146 1
21 -8 -1 2539.8 443.746 1
21 -8 2 5014.09 566.546 1
21 -8 5 10424.6 768.271 1
21 -7 -8 3725.26 618.788 1
21 -7 -5 18247.6 1243.5 1
21 -7 -2 6297.69 671.411 1
21 -7 1 12510.3 906.848 1
21 -7 4 11425.5 850.701 1
21 -6 -9 47756.2 2357.68 1
21 -6 -6 26772.7 1579.51 1
21 -6 -3 6794.94 720.797 1
21 -6 0 78614.1 2610.01 1
21 -6 3 2983.08 477.723 1
21 -6 6 4591.65 549.402 1
21 -5 -10 2497.02 545.004 1
21 -5 -10 2010.19 499.843 2
21 -5 -7 1959.57 501.819 1
21 -5 -4 10439.1 934.041 1
21 -5 -1 11122.4 925.249 1
21 -5 2 10854.5 895.667 1
21 -5 5 4799.05 581.062 1
21 -4 -8 736.487 380.09 1
21 -4 -5 2851.78 542.18 1
21 -4 -2 1427.19 411.767 1
21 -4 1 4547.2 594.768 1
21 -4 4 6652.68 697.337 1
21 -3 -9 11047.8 1118.25 1
21 -3 -6 1691.59 430.008 1
21 -3 -3 16287.9 1175.36 1
21 -3 0 5226.26 662.727 1
21 -3 3 6675.11 724.086 1
21 -3 6 2050.02 424.375 1
21 -2 -7 2332.64 552.067 1
21 -2 -4 3794.03 615.759 1
21 -2 -1 32334.2 1668.16 1
21 -2 2 14525.1 1086.58 1
-2 -19 2 14746.3 1008.05 3
21 -2 5 3050.68 521.502 1
21 -1 -8 6300.14 880.231 1
21 -1 -5 10636.4 1030.53 1
21 -1 -2 4623.47 654.824 1
21 -1 1 8555.18 853.395 1
-1 -20 1 8477.51 800.069 3
-1 -20 4 9156.72 764.578 3
21 -1 4 9176.36 882.386 1
21 0 -6 3014.19 599.688 1
21 0 -3 8719.08 908.993 1
21 0 0 7899.83 853.448 1
0 -21 0 6445.1 734.141 3
0 -21 3 8987.36 805.983 3
21 0 3 9354.55 914.253 1
21 1 -7 1206.89 477.548 1
21 1 -4 4616.64 700.203 1
21 1 -1 11099.3 1024.9 1
1 -22 -1 11312.2 1006.43 3
21 1 2 18802 1310.41 1
1 -22 2 18646.3 1228.74 3
21 1 5 4301.24 649.909 1
21 2 -8 2497.72 585.411 1
21 2 -5 2663.99 563.956 1
21 2 -2 5503.66 761.554 1
2 -23 -2 7043.94 818.582 3
2 -23 1 9023.84 873.104 3
21 2 1 6880.18 830.671 1
2 -23 4 7868.74 771.726 3
21 2 4 8545.32 920.757 1
21 3 -6 18897.2 1461.24 1
21 3 -3 1206 405.609 1
3 -24 0 6956.57 811.724 3
21 3 0 7873.54 906.927 1
3 -24 3 782.418 326.131 3
21 3 3 658.89 329.048 1
21 4 -4 31271.8 1885.51 1
21 4 -1 7738.64 923.45 1
4 -25 -1 5011.5 721.041 3
4 -25 2 8622.39 885.404 3
21 4 2 8724.59 951.191 1
21 5 -5 6730.33 909.284 1
21 5 -2 2740.91 584.326 1
5 -26 1 15191.3 1224.38 3
21 5 1 15685.3 1301.26 1
5 -26 4 7743.68 841.958 3
21 5 4 7777.86 945.731 1
21 6 -3 6366.78 880.818 1
21 6 0 1098.31 483.443 1
21 6 3 10248.2 1088.37 1
21 7 -1 3674.69 683.305 1
21 7 2 7860.05 973.052 1
5 22 -5 8827.22 954.722 2
4 22 -6 292.266 270.117 2
3 22 -7 3405.48 663.232 2
3 22 -4 1592.52 411.173 2
2 22 -5 497.638 278.936 2
1 22 -6 2825.93 547.439 2
22 -23 -6 2244.54 503.255 3
0 22 -7 1295.14 390.83 2
0 22 -4 25114.3 1445.08 2
-1 22 -8 2282.74 520.068 2
-1 22 -5 5733.57 707.796 2
-21 -1 7 614.12 301.275 4
-2 22 -9 3512.16 658.088 2
-2 22 -6 23293.8 1488.33 2
-20 -2 6 5319.5 634.375 4
-3 22 -7 8810.43 948.402 2
-3 22 -4 4949.4 613.076 2
22 -19 -1 32317 1468.07 1
-19 -3 5 1470.12 336.74 4
-4 22 -8 790.574 411.341 2
-4 22 -5 11378.7 964.299 2
22 -18 -2 14021.2 984.789 1
-18 -4 4 21830.4 1167.3 4
-18 -4 7 4476.24 619.522 4
-5 22 -9 4245.3 717.214 2
-5 22 -6 225.85 264.038 2
22 -17 -3 4685.44 607.714 1
-5 22 -3 5495.89 579.431 2
22 -17 0 8632.29 708.633 1
-17 -5 3 2554.36 378.4 4
-17 -5 6 8287.64 783.376 4
-6 22 -7 256.36 202.356 2
-6 22 -4 9228.17 804.572 2
22 -16 -4 8744.77 840.19 1
22 -16 -1 12523.3 894.957 1
-16 -6 5 2877.15 448.446 4
-7 22 -8 664.006 291.952 2
-7 22 -5 14231.6 1059.06 2
22 -15 -5 14806.2 1117.51 1
22 -15 -2 10144.3 842.564 1
22 -15 1 11974.6 809.593 1
-15 -7 7 40.6607 210.538 4
-8 22 -9 -91.5246 314.054 2
22 -14 -9 491.143 337.114 1
22 -14 -6 8178.69 858.548 1
-8 22 -6 8698.63 852.768 2
22 -14 -3 14516.2 1050.09 1
-8 22 -3 15869.5 955.814 2
22 -14 0 9733.94 767.119 1
-9 22 -10 769.963 355.863 2
22 -13 -7 883.003 380.077 1
-9 22 -7 701.253 342.274 2
22 -13 -4 19271 1245.97 1
-9 22 -4 17339.9 1072.37 2
22 -13 -1 28885 1417.13 1
22 -13 2 2034.46 356.643 1
22 -12 -8 1482.12 450.856 1
-10 22 -8 1648.92 463.624 2
22 -12 -5 28941.4 1602.8 1
-10 22 -5 28621.8 1471.65 2
22 -12 -2 965.227 297.554 1
22 -12 1 4489.22 531.098 1
22 -11 -9 2399.37 569.866 1
-11 22 -9 3487.87 640.697 2
22 -11 -6 3872.44 616.622 1
-11 22 -6 5368.53 664.261 2
22 -11 -3 5538.1 652.021 1
22 -11 0 16428.6 1048.36 1
22 -11 3 5718.12 574.087 1
22 -10 -7 18880.8 1387.34 1
22 -10 -4 16185.3 1149.4 1
22 -10 -1 1593.56 369.244 1
22 -10 2 24634.9 1262.66 1
22 -9 -8 3565.02 640.032 1
22 -9 -5 1738 447.215 1
22 -9 -2 706.535 296.022 1
22 -9 1 10405.4 833.833 1
22 -9 4 9135.11 742.396 1
22 -8 -9 1736.2 521.523 1
22 -8 -6 11016.8 1021.69 1
22 -8 -3 7205.16 759.726 1
22 -8 0 1163.87 339.974 1
22 -8 3 12292.4 899.042 1
22 -7 -7 17080.7 1327.23 1
22 -7 -4 7153.07 801.247 1
22 -7 -1 5312.46 641.998 1
22 -7 2 2046.38 417.406 1
22 -7 5 2335.85 401.683 1
22 -6 -8 13781.5 1238.81 1
22 -6 -5 8803.15 917.164 1
22 -6 -2 4540.48 611.618 1
22 -6 1 9534.01 841.143 1
22 -6 4 564.264 255.751 1
22 -5 -9 12477.8 1196.6 1
22 -5 -6 2242.75 537.5 1
22 -5 -3 609.819 327.573 1
22 -5 0 17970.2 1193.5 1
22 -5 3 1966.33 404.08 1
22 -5 6 2177.99 420.469 1
22 -4 -10 338.611 313.805 2
22 -4 -7 10474.1 1064.26 1
22 -4 -4 6392.26 794.965 1
22 -4 -1 3684.21 581.453 1
22 -4 2 6977.99 753.07 1
22 -4 5 11568.3 957.979 1
22 -3 -8 3469.6 657.113 1
22 -3 -5 9120.72 945.888 1
22 -3 -2 10161.2 950.333 1
22 -3 1 29379.4 1605.71 1
22 -3 4 8868.12 853.53 1
22 -2 -6 3643.03 633.661 1
22 -2 -3 8440.72 891.051 1
22 -2 0 2380.79 507.262 1
22 -2 3 7836.97 821.76 1
22 -1 -7 4028.26 692.747 1
22 -1 -4 4077.52 648.221 1
22 -1 -1 6258.99 787.119 1
-1 -21 2 4236.74 582.878 3
22 -1 2 4823.91 668.065 1
22 -1 5 2544.29 534.745 1
22 0 -5 13602.8 1227.5 1
22 0 -2 317.776 342.034 1
22 0 1 4082.56 660.553 1
0 -22 1 4498.32 614.906 3
22 0 4 24676 1542.64 1
22 1 -6 2954.66 616.841 1
22 1 -3 18632.3 1399.96 1
22 1 0 1030.84 416.432 1
1 -23 0 816.3 329.168 3
1 -23 3 17014.4 1182.05 3
22 1 3 17352.6 1305.81 1
22 2 -7 18480.1 1503.9 1
22 2 -4 18923.1 1446.96 1
22 2 -1 1008.83 384.262 1
2 -24 -1 1875.16 486.222 3
22 2 2 337.208 333.292 1
2 -24 2 345.628 274.634 3
22 2 5 14039.6 1217.98 1
22 3 -5 19890 1524.08 1
22 3 -2 3488.34 671.981 1
22 3 1 12668.9 1158.92 1
3 -25 1 15182.5 1196.03 3
22 3 4 45287.3 2267.56 1
22 4 -3 694.137 453.521 1
22 4 0 14452.5 1264.1 1
22 4 3 -418.169 332.812 1
4 -26 3 -161.821 248.053 3
22 5 -4 671.461 376.938 1
22 5 -1 -197.597 338.176 1
22 5 2 1398.23 458.624 1
22 6 -2 5803.31 855.489 1
22 6 1 17404 1445.41 1
2 23 -6 95.157 259.752 2
1 23 -7 955.325 379.53 2
0 23 -8 4944.15 800.174 2
0 23 -5 3375.61 557.27 2
-1 23 -6 240.661 197.427 2
-2 23 -7 2355.39 511.532 2
23 -21 -1 7909.45 723.861 1
-3 23 -8 1202.65 438.775 2
-3 23 -5 9524.08 901.996 2
23 -20 -2 2553.61 447.904 1
-20 -3 7 11351.5 978.614 4
-4 23 -9 5129.79 811.909 2
-4 23 -6 5106.18 712.518 2
23 -19 -3 3064.74 516.089 1
23 -19 0 6414.38 618.991 1
-19 -4 6 352.762 228.84 4
-5 23 -7 144.146 225.232 2
-5 23 -4 21544.6 1280.85 2
23 -18 -4 20740.4 1334.2 1
23 -18 -1 7502.12 714.782 1
-18 -5 5 741.485 259.31 4
-6 23 -8 8818.2 980.544 2
-6 23 -5 591.278 259.776 2
23 -17 -5 375.137 263.051 1
23 -17 -2 6378.52 702.693 1
23 -17 1 13053.1 856.521 1
-17 -6 4 23036.3 1220.78 4
-17 -6 7 3478.78 565.922 4
-7 23 -9 1495.18 475.012 2
-7 23 -6 1251.56 400.473 2
23 -16 -6 617.349 320.182 1
23 -16 -3 2592.09 477.631 1
23 -16 0 5831.98 610.228 1
-16 -7 6 3453.12 526.183 4
23 -15 -7 1204.24 427.146 1
-8 23 -7 1855.12 450.053 2
23 -15 -4 1361.85 412.458 1
-8 23 -4 1323.62 330.907 2
23 -15 -1 3625.72 493.297 1
23 -15 2 7035.97 623.305 1
23 -14 -8 1403.99 483.924 1
-9 23 -8 1114.71 371.66 2
23 -14 -5 5588.81 729.539 1
-9 23 -5 6977.73 719.154 2
23 -14 -2 8356.75 784.312 1
23 -14 1 8126.41 703.616 1
23 -13 -9 617.436 357.682 1
-10 23 -9 873.979 412.189 2
23 -13 -6 1926.75 490.26 1
-10 23 -6 1779.23 401.473 2
23 -13 -3 10969.8 929.351 1
23 -13 0 -13.7445 195.765 1
23 -12 -7 10616.1 1065.6 1
-11 23 -7 10936.1 1013.3 2
23 -12 -4 20698 1337.61 1
-11 23 -4 20399.3 1162.84 2
23 -12 -1 7844.92 747.255 1
23 -12 2 5480.95 574.84 1
23 -11 -8 9126.19 1019.99 1
23 -11 -5 10484.5 987.714 1
23 -11 -2 872.907 299.843 1
23 -11 1 367.506 256.693 1
23 -10 -9 9812.87 1076.17 1
23 -10 -6 1317.62 432.102 1
23 -10 -3 11058.6 948.372 1
23 -10 0 24238.9 1331.96 1
23 -10 3 426.024 235.042 1
23 -9 -7 6993.7 868.051 1
23 -9 -4 4429.33 631.892 1
23 -9 -1 6414.4 702.559 1
23 -9 2 6277.87 669.497 1
23 -8 -8 6921.95 892.119 1
23 -8 -5 1845.37 478.068 1
23 -8 -2 314.941 312.964 1
23 -8 1 12548.8 966.835 1
23 -8 4 5868.37 636.095 1
23 -7 -6 12329.5 1107.16 1
23 -7 -3 6483.56 766.234 1
23 -7 0 2683.28 501.129 1
23 -7 3 22201 1308.49 1
23 -6 -10 6157.11 856.447 2
23 -6 -7 2375.53 519.473 1
23 -6 -4 26071.2 1580.84 1
23 -6 -1 20809.1 1341.21 1
23 -6 2 15665.5 1131.95 1
23 -6 5 471.337 240.254 1
23 -5 -8 4360.09 728.294 1
23 -5 -5 11251.2 1060.1 1
23 -5 -2 4149.44 628.508 1
23 -5 1 3623.7 591.867 1
23 -5 4 953.027 339.827 1
23 -4 -6 8782.89 981.632 1
23 -4 -3 6113.45 792.989 1
23 -4 0 1489.78 422.705 1
23 -4 3 8065.3 834.322 1
23 -4 6 4147.24 599.175 1
23 -3 -7 14380.1 1296.38 1
23 -3 -4 2607.46 557.577 1
23 -3 -1 986.964 370.051 1
23 -3 2 5485.95 726.855 1
23 -3 5 2805.26 522.744 1
23 -2 -5 6197.88 824.799 1
23 -2 -2 7953.25 901.768 1
23 -2 1 14370 1174.11 1
23 -2 4 814.82 354.4 1
23 -1 -6 3772.22 697.426 1
23 -1 -3 8322.5 938.582 1
23 -1 0 8271.5 920.536 1
23 -1 3 3070.34 588.199 1
-1 -22 3 2795 475.794 3
23 0 -4 8364.72 950.786 1
23 0 -1 2667.42 558.04 1
23 0 2 -117.181 266.839 1
0 -23 2 -224.56 244.998 3
23 0 5 3776.37 634.312 1
23 1 -5 6032.61 843.792 1
23 1 -2 2751.74 565.772 1
1 -24 1 5589.46 727.743 3
23 1 1 6101.12 827.945 1
23 1 4 3284.24 622.612 1
23 2 -3 8320.24 1011.67 1
23 2 0 -6.09679 326.833 1
2 -25 3 16760.9 1213.46 3
23 2 3 15272.8 1302.92 1
23 3 -4 4074.35 736.11 1
23 3 -1 18408.7 1470.97 1
23 3 2 5165.85 781.712 1
23 4 -2 17977.5 1506.57 1
23 4 1 28232.2 1818.78 1
23 4 4 3694.2 705.879 1
23 5 0 3305.75 688.147 1
-1 24 -7 -301.796 288.107 2
-2 24 -8 1845.12 499.75 2
24 -22 -2 354.57 180.856 1
-3 24 -6 -425.75 276.661 2
24 -21 -3 852.015 327.709 1
-4 24 -7 1208.35 444.294 2
24 -20 -4 16603.1 1214.23 1
24 -20 -1 11969.7 908.511 1
-5 24 -8 1926.59 512.235 2
24 -19 -5 5034.71 717.34 1
24 -19 -2 2196.02 429.271 1
-6 24 -9 81.7938 259.707 2
-6 24 -6 3514.14 590.817 2
24 -18 -6 2811.84 543.297 1
24 -18 -3 10308.1 916.14 1
24 -18 0 8481.56 733.465 1
-18 -6 6 13819 1060.5 4
24 -17 -7 108.306 298.288 1
-7 24 -7 -968.899 363.509 2
24 -17 -4 13331.4 1082.56 1
24 -17 -1 10574.5 862.713 1
-17 -7 5 202.957 174.935 4
24 -16 -8 5318.51 797.938 1
-8 24 -8 4186.92 687.787 2
24 -16 -5 691.689 342.34 1
24 -16 -2 5169.9 644.556 1
24 -16 1 4580.36 543.34 1
-9 24 -9 2119.29 527.857 2
24 -15 -6 6241.37 803.117 1
-9 24 -6 6611.73 772.985 2
24 -15 -3 3510.86 558.402 1
24 -15 0 5075.5 584.217 1
-10 24 -7 6821.22 805.211 2
24 -14 -7 7962.17 934.531 1
24 -14 -4 29964.8 1660.3 1
24 -14 -1 17848.1 1144.33 1
24 -14 2 30264.6 1405.6 1
24 -13 -8 294.998 298.668 1
-11 24 -8 633.065 288.676 2
24 -13 -5 2542.57 521.802 1
-11 24 -5 2209.33 427.529 2
24 -13 -2 35597.6 1728.59 1
24 -13 1 14645.6 1004.47 1
24 -12 -6 3109.97 611.247 1
24 -12 -3 298.709 229.666 1
24 -12 0 3404.17 530.21 1
24 -12 3 1089.72 277.383 1
24 -11 -7 11071 1106.25 1
24 -11 -4 44597.9 2081.92 1
24 -11 -1 9583.66 870.944 1
24 -11 2 5548.04 620.081 1
24 -10 -8 3452.31 670.955 1
24 -10 -5 5651.54 758.793 1
24 -10 -2 4715.32 650.333 1
24 -10 1 6183.24 690.578 1
24 -9 -6 13248.1 1174.09 1
24 -9 -3 14447.6 1139.47 1
24 -9 0 15449.7 1125.32 1
24 -9 3 2430.93 449.722 1
24 -8 -7 17898.3 1420.38 1
24 -8 -4 8422.11 917.435 1
24 -8 -1 13813.4 1082.26 1
24 -8 2 9399.17 864.953 1
24 -7 -8 4382.59 745.358 1
24 -7 -5 5054.66 734.915 1
24 -7 -2 2647.79 527.01 1
24 -7 1 10780.6 961.289 1
24 -7 4 454.829 240.673 1
24 -6 -6 4102.02 672.799 1
24 -6 -3 3875.15 634.544 1
24 -6 0 1165.85 374.829 1
24 -6 3 2907.36 503.824 1
24 -5 -7 13271.5 1249.26 1
24 -5 -4 7835.48 902.65 1
24 -5 -1 3853.52 632.03 1
24 -5 2 27271 1585.89 1
24 -5 5 2226.68 470.471 1
24 -4 -5 7257.83 911.877 1
24 -4 -2 3181.31 592.01 1
24 -4 1 20547.3 1404.63 1
24 -4 4 1596.35 415.999 1
24 -3 -6 9239.12 1030.84 1
24 -3 -3 7587.93 911.363 1
24 -3 0 15920.5 1251.1 1
24 -3 3 2059.71 484.027 1
24 -3 6 1602.11 402.669 1
24 -2 -4 3587.55 668.166 1
24 -2 -1 8211.25 940.696 1
24 -2 2 25003.3 1585.39 1
24 -2 5 -226.708 271.41 1
24 -1 -5 15064.8 1342 1
24 -1 -2 -263.432 343.621 1
24 -1 1 1645.69 466.663 1
24 -1 4 4572.2 707.08 1
24 0 -3 5707.38 809.941 1
24 0 0 7229.9 903.828 1
24 0 3 769.553 389.199 1
24 1 -4 5781.73 849.5 1
24 1 -1 10865.9 1141.88 1
24 1 2 1727.08 496.277 1
1 -25 2 1250.68 396.079 3
24 1 5 2265.88 547.552 1
24 2 -2 20065.6 1542.04 1
24 2 1 2722.45 622.004 1
24 2 4 6093.64 856.687 1
24 3 0 7357.05 956.919 1
24 3 3 9623.91 1084.42 1
25 -23 -3 17073.1 1199.71 1
25 -22 -4 39759.8 1958.32 1
-4 25 -8 18.7559 257.059 2
25 -21 -5 3890.31 656.705 1
25 -21 -2 8943.64 839.789 1
25 -20 -6 5688.89 796.531 1
25 -20 -3 13978.1 1088.58 1
-6 25 -7 1519.71 429.265 2
25 -19 -7 1507.53 464.928 1
25 -19 -4 4432.18 655.067 1
25 -19 -1 13284.8 989.516 1
-7 25 -8 1021.49 392.33 2
25 -18 -5 2773.14 533.406 1
25 -18 -2 5415.01 667.249 1
25 -17 -6 6334.77 833.395 1
25 -17 -3 4865.62 662.786 1
25 -17 0 4276.15 546.099 1
-17 -8 6 6733.53 743.337 4
25 -16 -7 4825.11 746.72 1
-9 25 -7 4298.77 653.116 2
25 -16 -4 1765.46 455.945 1
25 -16 -1 963.579 292.145 1
-10 25 -8 446.333 282.764 2
25 -15 -5 670.779 343.902 1
25 -15 -2 5720.74 690.97 1
25 -15 1 1245.91 348.177 1
-11 25 -9 4133.01 709.8 2
25 -14 -6 941.529 417.155 1
25 -14 -3 589.666 302.873 1
25 -14 0 10106.8 867.902 1
25 -13 -7 2497.29 591.771 1
25 -13 -4 6092.8 774.778 1
25 -13 -1 377.608 237.491 1
25 -13 2 7278.19 711.805 1
25 -12 -5 1708.87 508.804 1
25 -12 -2 20046.6 1321.11 1
25 -12 1 808.51 299.786 1
25 -11 -6 618.232 344.562 1
25 -11 -3 7146.4 814.901 1
25 -11 0 15163.2 1108.65 1
25 -11 3 3755.43 523.111 1
25 -10 -7 1262.94 414.328 1
25 -10 -4 22216.8 1474.57 1
25 -10 -1 7338.26 798.826 1
25 -10 2 439.535 253.925 1
25 -9 -5 1020.57 349.309 1
25 -9 -2 1840.44 486.626 1
25 -9 1 26402.3 1496.15 1
25 -8 -6 20440.3 1514.73 1
25 -8 -3 2807.8 568.48 1
25 -8 0 9573.81 923.392 1
25 -8 3 602.592 288.98 1
25 -7 -7 1885.96 481.364 1
25 -7 -4 -382.802 329.035 1
25 -7 -1 2435.53 498.44 1
25 -7 2 6227.89 749.139 1
25 -6 -5 6572.08 873.123 1
25 -6 -2 6960.61 848.653 1
25 -6 1 17907.2 1294.19 1
25 -6 4 1813.56 418.542 1
25 -5 -6 8288.46 998.363 1
25 -5 -3 4555.56 717.968 1
25 -5 0 11175 1049.99 1
25 -5 3 7182.93 798.69 1
25 -4 -4 1955.36 529.24 1
25 -4 -1 6649.69 836.264 1
25 -4 2 458.315 286.386 1
25 -4 5 7258.55 828.073 1
25 -3 -5 4341.07 758.293 1
25 -3 -2 8338.47 960.081 1
25 -3 1 3616.57 667.746 1
25 -3 4 1574.43 457.514 1
25 -2 -3 5377.34 784.869 1
25 -2 0 6964.14 886.568 1
25 -2 3 14866.1 1239.59 1
25 -1 -4 5938.77 854.664 1
25 -1 -1 2065.42 532.992 1
25 -1 2 2162.47 518.283 1
25 -1 5 2533.92 548.897 1
25 0 -2 1513.27 479.506 1
25 0 1 5567.83 798.35 1
25 0 4 3037.04 628.806 1
25 1 0 35199.3 2076.43 1
25 1 3 7066.07 908.811 1
25 2 2 4292.72 734.415 1
26 -24 -4 7328.04 846.176 1
26 -23 -5 8297.02 925.278 1
26 -22 -6 210.434 279.597 1
26 -22 -3 -14.9069 191.812 1
26 -21 -4 7402.97 847.692 1
26 -20 -5 19316.9 1404.48 1
26 -20 -2 2042.11 426.674 1
26 -19 -6 842.879 334.479 1
26 -19 -3 6787.52 791.851 1
26 -18 -4 6584.54 818.826 1
26 -18 -1 2037.73 425.426 1
26 -17 -5 11350.9 1088.59 1
26 -17 -2 666.025 276.929 1
26 -16 -6 1854.25 521.511 1
26 -16 -3 1138.05 388.953 1
26 -16 0 9497.83 844.141 1
26 -15 -7 -124.56 299.27 1
26 -15 -4 9497.86 943.233 1
26 -15 -1 1094.29 310.529 1
26 -14 -5 6877.82 847.867 1
26 -14 -2 3012.82 536.035 1
26 -14 1 1208.55 364.049 1
26 -13 -6 5238.1 765.919 1
26 -13 -3 3265.4 582.613 1
26 -13 0 4735.67 633.479 1
26 -12 -7 2552.78 607.719 1
26 -12 -4 5581.96 761.372 1
26 -12 -1 -362.491 339.669 1
26 -12 2 518.287 261.838 1
26 -11 -5 1693.11 461.224 1
26 -11 -2 7759.08 850.406 1
26 -11 1 3539.55 553.888 1
26 -10 -6 650.971 386.037 1
26 -10 -3 15937.8 1262.02 1
26 -10 0 18879.2 1301.76 1
26 -10 3 695.122 295.932 1
26 -9 -4 660.163 339.111 1
26 -9 -1 29590.8 1701.79 1
26 -9 2 2675.47 517.488 1
26 -8 -5 10472.1 1082.54 1
26 -8 -2 12231.6 1115.64 1
26 -8 1 2610.16 517.25 1
26 -8 4 10121.3 923.285 1
26 -7 -6 492.951 344.582 1
26 -7 -3 5745.53 798.173 1
26 -7 0 3715.18 635.374 1
26 -7 3 1111.96 378.901 1
26 -6 -4 10108.9 1072.8 1
26 -6 -1 9838.46 1015.46 1
26 -6 2 130.265 283.262 1
26 -5 -5 1299.43 521.218 1
26 -5 -2 156.889 341.288 1
26 -5 1 9394.08 997.245 1
26 -5 4 2345.51 505.142 1
26 -4 -3 1804.74 501.193 1
26 -4 0 2380.5 583.039 1
26 -4 3 10179.4 1016.38 1
26 -3 -4 3133.57 704.199 1
26 -3 -1 16973.8 1395.22 1
26 -3 2 417.626 268.347 1
26 -3 5 2773.49 597.589 1
26 -2 -2 5707.83 850.781 1
26 -2 1 11377.5 1136.69 1
26 -2 4 8236.24 952.406 1
26 -1 0 16613.9 1410.81 1
26 -1 3 307.857 345.598 1
26 0 -1 1976.64 572.718 1
26 0 2 13257.8 1241.47 1
27 -23 -4 2922.23 564.459 1
27 -22 -5 -256.898 260.598 1
27 -21 -3 9307.54 926.586 1
27 -20 -4 8742.85 932.297 1
27 -19 -5 9145.73 981.971 1
27 -19 -2 2289.79 459.399 1
27 -18 -6 452.925 324.252 1
27 -18 -3 2026.7 448.787 1
27 -17 -4 4651.03 706.155 1
27 -17 -1 9606.41 883.728 1
27 -16 -5 1572.49 465.058 1
27 -16 -2 -338.149 244.162 1
27 -15 -6 1385.16 488.863 1
27 -15 -3 7117.69 840.606 1
27 -15 0 771.83 298.998 1
27 -14 -4 5376.92 751.606 1
27 -14 -1 -158.534 277.632 1
27 -13 -5 4032.61 677.72 1
27 -13 -2 11182.4 1030.61 1
27 -13 1 4650.13 626.835 1
27 -12 -6 5129.94 788.324 1
27 -12 -3 10918.5 1056.58 1
27 -12 0 -91.874 252.732 1
27 -11 -4 15067.6 1282.73 1
27 -11 -1 1093.18 406.087 1
27 -11 2 6830.25 766.285 1
27 -10 -5 768.268 390.249 1
27 -10 -2 2069.9 475.114 1
27 -10 1 9947.27 944.788 1
27 -9 -3 6346.75 826.03 1
27 -9 0 4098.47 646.995 1
27 -9 3 2895.07 516.817 1
27 -8 -4 10083.9 1082.91 1
27 -8 -1 13476.6 1173.56 1
27 -8 2 -149.373 312.577 1
27 -7 -5 5098.33 787.63 1
27 -7 -2 68.6482 297.514 1
27 -7 1 5822.05 770.836 1
27 -6 -3 2338.83 561.875 1
27 -6 0 2015.2 502.077 1
27 -6 3 1992.19 498.448 1
27 -5 -4 16732.3 1432 1
27 -5 -1 17156.9 1397.43 1
27 -5 2 1236.83 412.906 1
27 -4 -2 14949.4 1322.9 1
27 -4 1 2769.05 628.186 1
27 -4 4 12064.7 1134.33 1
27 -3 0 -249.372 398.627 1
27 -3 3 1689.16 503.273 1
27 -2 -1 1607.35 488.901 1
27 -2 2 29797.9 1861.92 1
28 -22 -4 2060.43 503.575 1
28 -21 -5 5238.76 781.764 1
28 -20 -3 2961.76 554.792 1
28 -19 -4 2728.84 556.288 1
28 -18 -5 714.366 363.883 1
28 -18 -2 3491.72 582.835 1
28 -17 -3 12256.5 1099.1 1
28 -16 -4 1795.72 464.457 1
28 -16 -1 5900.69 721.503 1
28 -15 -5 187.117 239.936 1
28 -15 -2 5687.51 746.065 1
28 -14 -3 7198.94 863.093 1
28 -14 0 2178.09 485.946 1
28 -13 -4 5732.24 799.399 1
28 -13 -1 655.295 367.732 1
28 -12 -5 26325.4 1753.36 1
28 -12 -2 1174.06 444.73 1
28 -12 1 7278.85 819.76 1
28 -11 -3 6779.08 870.191 1
28 -11 0 7003.73 832.275 1
28 -10 -4 7205.14 914.948 1
28 -10 -1 1460.21 458.203 1
28 -10 2 4930.65 690.726 1
28 -9 -2 425.957 300.821 1
28 -9 1 5317.27 733.857 1
28 -8 -3 3407.11 665.517 1
28 -8 0 3861.65 689.146 1
28 -8 3 5505.21 736.466 1
28 -7 -1 1731.08 469.432 1
28 -7 2 1657.56 464.952 1
28 -6 -2 27642.2 1808.21 1
28 -6 1 7899.37 937.028 1
28 -5 0 14022.2 1285.65 1
28 -5 3 4163.24 698.113 1
28 -4 -1 19965.9 1566.24 1
28 -4 2 5411.38 797.363 1
29 -21 -4 2046.43 519.037 1
29 -19 -3 1880.27 491.249 1
29 -18 -4 2318.64 554.763 1
29 -17 -2 -154.067 317.88 1
29 -16 -3 2620.7 545.871 1
29 -15 -4 6272.08 838.357 1
29 -15 -1 4137.6 639.234 1
29 -14 -2 15506.7 1261.91 1
29 -13 -3 2674.2 565.719 1
29 -13 0 10243.3 1005.19 1
29 -12 -4 -234.777 396.515 1
29 -12 -1 4002.41 671.057 1
29 -11 -2 120.584 333.055 1
29 -11 1 1130.47 352.333 1
29 -10 -3 2876.15 606.952 1
29 -10 0 275.371 270.727 1
29 -9 -1 4099.71 688.699 1
29 -9 2 11895.5 1118.86 1
29 -8 -2 36.8544 306.246 1
29 -8 1 4107.07 698.176 1
29 -7 0 4411.1 717.239 1
29 -7 3 2675.65 569.883 1
29 -6 2 10132.9 1075.23 1
30 -18 -3 13654.7 1200.83 1
30 -16 -2 2213.98 531.013 1
30 -15 -3 5751.64 800.898 1
30 -14 -1 4021.64 672.948 1
30 -13 -2 6102.83 832.118 1
30 -12 0 2973.15 567.432 1
30 -11 -1 2558.47 588.897 1
30 -10 1 5178.96 761.224 1
30 -9 0 4999.29 777.233 1
30 -8 2 1536.9 468.236 1
31 -15 -2 379.842 413.67 1
31 -13 -1 6858.07 901.416 1
31 -11 0 2867.21 596.325 1

_iucr_refine_instructions_details 
;

    ijsf1413.res created by SHELXL-2014/7

TITL ijsf1413 in R3
CELL 0.71073 21.260206 21.260206 10.181419 90 90 120
ZERR 9 0.000537 0.000537 0.000267 0 0 0
LATT -3
SYMM -Y,+X-Y,+Z
SYMM +Y-X,-X,+Z
SFAC C H N O
UNIT 180 180 18 27
EQIV $1 -0.667-Y,-0.333+X-Y,-0.333+Z
EQIV $2 -1+Y-X,-1-X,+Z
 
L.S. 8
PLAN  20
HTAB N1 O2_$1
HTAB N2 O3_$2
BOND $H
MORE -1
CONF
fmap 2
acta
REM <olex2.extras>
REM <HklSrc "%.\\ijsf1413.hkl">
REM </olex2.extras>
 
WGHT    0.039800    2.469900
FVAR       3.74990
C1    1   -0.464130   -0.338952   -0.380473    11.00000    0.01236    0.01206 =
         0.01853    0.00106    0.00255    0.00440
C2    1   -0.460767   -0.357931   -0.523892    11.00000    0.01170    0.01235 =
         0.01676   -0.00004    0.00100    0.00554
AFIX  13
H2    2   -0.488844   -0.342561   -0.577891    11.00000   -1.20000
AFIX   0
C3    1   -0.493124   -0.440610   -0.537323    11.00000    0.01313    0.01305 =
         0.02046   -0.00145    0.00180    0.00527
AFIX  23
H3A   2   -0.496250   -0.452730   -0.629837    11.00000   -1.20000
H3B   2   -0.460344   -0.454064   -0.496348    11.00000   -1.20000
AFIX   0
C4    1   -0.566969   -0.484634   -0.476839    11.00000    0.01277    0.01206 =
         0.01849   -0.00032    0.00104    0.00551
C5    1   -0.579697   -0.515746   -0.346856    11.00000    0.01521    0.01312 =
         0.01875   -0.00150   -0.00019    0.00662
C6    1   -0.534405   -0.518538   -0.249160    11.00000    0.01758    0.01605 =
         0.02425   -0.00160   -0.00144    0.00801
AFIX  43
H6    2   -0.484267   -0.494080   -0.260165    11.00000   -1.20000
AFIX   0
C7    1   -0.565703   -0.558257   -0.136528    11.00000    0.02749    0.01823 =
         0.02206   -0.00201   -0.00553    0.01230
AFIX  43
H7    2   -0.536146   -0.560644   -0.071706    11.00000   -1.20000
AFIX   0
C8    1   -0.641377   -0.595141   -0.118008    11.00000    0.02745    0.01583 =
         0.01870    0.00174    0.00157    0.00893
AFIX  43
H8    2   -0.661028   -0.621951   -0.041699    11.00000   -1.20000
AFIX   0
C9    1   -0.687178   -0.592186   -0.211689    11.00000    0.01898    0.01732 =
         0.02292    0.00144    0.00398    0.00716
AFIX  43
H9    2   -0.737164   -0.615872   -0.198843    11.00000   -1.20000
AFIX   0
C10   1   -0.655680   -0.552411   -0.326062    11.00000    0.01434    0.01360 =
         0.01978   -0.00030    0.00034    0.00595
C11   1   -0.633754   -0.502336   -0.527737    11.00000    0.01390    0.01174 =
         0.01880   -0.00080    0.00191    0.00449
C12   1   -0.655057   -0.484424   -0.654071    11.00000    0.01225    0.01178 =
         0.01945    0.00061   -0.00032    0.00306
C13   1   -0.705845   -0.460544   -0.653813    11.00000    0.01779    0.02047 =
         0.02168    0.00136    0.00205    0.00916
AFIX  43
H13   2   -0.723827   -0.454531   -0.574412    11.00000   -1.20000
AFIX   0
C14   1   -0.729532   -0.445798   -0.770937    11.00000    0.01987    0.02590 =
         0.02776    0.00162   -0.00285    0.01248
AFIX  43
H14   2   -0.763566   -0.430496   -0.769925    11.00000   -1.20000
AFIX   0
C15   1   -0.702063   -0.454045   -0.889781    11.00000    0.02561    0.02524 =
         0.02085   -0.00007   -0.00649    0.01055
AFIX  43
H15   2   -0.717894   -0.444361   -0.968352    11.00000   -1.20000
AFIX   0
C16   1   -0.651243   -0.476625   -0.891304    11.00000    0.02646    0.02086 =
         0.01871   -0.00478    0.00011    0.00881
AFIX  43
H16   2   -0.632592   -0.481402   -0.970920    11.00000   -1.20000
AFIX   0
C17   1   -0.627801   -0.492281   -0.773965    11.00000    0.01926    0.01682 =
         0.02312   -0.00301   -0.00001    0.00858
AFIX  43
H17   2   -0.594046   -0.507935   -0.775702    11.00000   -1.20000
AFIX   0
C18   1   -0.531984   -0.314774   -0.226166    11.00000    0.03963    0.05053 =
         0.02236   -0.00522    0.00566    0.02989
AFIX 137
H18A  2   -0.547089   -0.357967   -0.175120    11.00000   -1.50000
H18B  2   -0.569055   -0.301583   -0.223506    11.00000   -1.50000
H18C  2   -0.487714   -0.275950   -0.190574    11.00000   -1.50000
AFIX   0
C19   1   -0.343486   -0.249006   -0.559861    11.00000    0.01593    0.01589 =
         0.01455    0.00177    0.00184    0.00703
C20   1   -0.266864   -0.218260   -0.609967    11.00000    0.01603    0.01779 =
         0.03125    0.00031    0.00678    0.00466
AFIX 137
H20A  2   -0.233263   -0.195000   -0.539140    11.00000   -1.50000
H20B  2   -0.257856   -0.183404   -0.677852    11.00000   -1.50000
H20C  2   -0.260719   -0.256811   -0.644791    11.00000   -1.50000
AFIX   0
N1    3   -0.386178   -0.321919   -0.569541    11.00000    0.01377    0.01396 =
         0.02278    0.00087    0.00557    0.00737
H1    2   -0.366636   -0.348135   -0.594407    11.00000    0.02346
N2    3   -0.687358   -0.541956   -0.435662    11.00000    0.01156    0.01787 =
         0.02075    0.00237    0.00083    0.00484
H2A   2   -0.731661   -0.564124   -0.453979    11.00000    0.02459
O1    4   -0.520047   -0.328095   -0.360992    11.00000    0.02041    0.02822 =
         0.01986   -0.00104    0.00266    0.01653
O2    4   -0.423680   -0.336346   -0.294870    11.00000    0.01615    0.02032 =
         0.02046   -0.00068   -0.00243    0.00768
O3    4   -0.366309   -0.210818   -0.512493    11.00000    0.01977    0.01571 =
         0.02344    0.00009    0.00271    0.00985
HKLF 4
 
REM  ijsf1413 in R3
REM R1 =  0.0363 for    3948 Fo > 4sig(Fo)  and  0.0404 for all    4199 data
REM    236 parameters refined using      1 restraints
 
END  
     
WGHT      0.0398      2.4699 

REM Highest difference peak  0.265,  deepest hole -0.227,  1-sigma level  0.045
Q1    1  -0.4635 -0.3490 -0.4512  11.00000  0.05    0.27
Q2    1  -0.4208 -0.3391 -0.5479  11.00000  0.05    0.26
Q3    1  -0.5311 -0.4673 -0.5179  11.00000  0.05    0.25
Q4    1  -0.6169 -0.5304 -0.3311  11.00000  0.05    0.24
Q5    1  -0.7122 -0.4623 -0.7291  11.00000  0.05    0.22
Q6    1  -0.6957 -0.4871 -0.8764  11.00000  0.05    0.22
Q7    1  -0.7002 -0.4304 -0.8239  11.00000  0.05    0.22
Q8    1  -0.6711 -0.5849 -0.2738  11.00000  0.05    0.22
Q9    1  -0.5697 -0.4895 -0.3960  11.00000  0.05    0.21
Q10   1  -0.5557 -0.5195 -0.3079  11.00000  0.05    0.20
Q11   1  -0.6667 -0.3333 -0.3778  10.33333  0.05    0.20
Q12   1  -0.6496 -0.4906 -0.8279  11.00000  0.05    0.20
Q13   1  -0.3059 -0.2283 -0.5911  11.00000  0.05    0.20
Q14   1  -0.6696 -0.4594 -0.6807  11.00000  0.05    0.19
Q15   1  -0.6724 -0.5461 -0.3768  11.00000  0.05    0.19
Q16   1  -0.4791 -0.3993 -0.5217  11.00000  0.05    0.18
Q17   1  -0.6575 -0.5836 -0.1617  11.00000  0.05    0.18
Q18   1  -0.6590 -0.4994 -0.7237  11.00000  0.05    0.18
Q19   1  -0.5939 -0.4781 -0.5092  11.00000  0.05    0.17
Q20   1  -0.5555 -0.5416 -0.2001  11.00000  0.05    0.17

  REM The information below was added by Olex2.
  REM
  REM R1 = 0.0363 for 3948 Fo > 4sig(Fo) and 0.0404 for all 6369 data
  REM n/a parameters refined using n/a restraints
  REM Highest difference peak 0.27, deepest hole -0.23
  REM Mean Shift 0, Max Shift 0.000.

  REM +++ Tabular Listing of Refinement Information +++
  REM R1_all = 0.0404
  REM R1_gt = 0.0363
  REM wR_ref = 0.0900
  REM GOOF = 1.048
  REM Shift_max = 0.000
  REM Shift_mean = 0
  REM Reflections_all = 6369
  REM Reflections_gt = 3948
  REM Parameters = n/a
  REM Hole = -0.23
  REM Peak = 0.27
  REM Flack = -0.5(5)

  
;
loop_
_exptl_crystal_face_index_h
_exptl_crystal_face_index_k
_exptl_crystal_face_index_l
_exptl_crystal_face_perp_dist
_exptl_oxdiff_crystal_face_indexfrac_h
_exptl_oxdiff_crystal_face_indexfrac_k
_exptl_oxdiff_crystal_face_indexfrac_l
_exptl_oxdiff_crystal_face_x
_exptl_oxdiff_crystal_face_y
_exptl_oxdiff_crystal_face_z
-1 2 0 0.0846 -1.0001 2.0001 -0.0000 0.0238 -0.0396 0.0482
5 0 3 0.1106 5.0001 0.0001 3.0001 0.2036 -0.0910 -0.1757
5 -1 0 0.0631 5.0000 -0.9998 0.0000 0.1486 0.0764 -0.0571
1 1 0 0.0807 0.9999 1.0001 -0.0000 0.0654 -0.0009 0.0131
0 5 1 0.0946 -0.0003 5.0002 0.9999 0.1571 -0.1188 0.0558
0 1 -1 0.0984 -0.0001 1.0001 -1.0000 0.0213 0.0378 0.0668
-1 1 1 0.0874 -1.0000 1.0000 1.0000 0.0025 -0.0774 -0.0186
0 0 -1 0.1285 -0.0000 0.0001 -1.0000 -0.0084 0.0513 0.0463
-2 -1 -1 0.1177 -2.0000 -1.0001 -1.0000 -0.1095 0.0396 0.0406
3 -2 0 0.0709 3.0001 -2.0000 0.0000 0.0475 0.0647 -0.0629
1 0 0 0.0689 1.0000 0.0001 -0.0000 0.0357 0.0126 -0.0073
-1 -1 0 0.0806 -0.9999 -1.0001 0.0000 -0.0654 0.0009 -0.0131
1 -2 0 0.0968 1.0001 -2.0001 0.0000 -0.0238 0.0396 -0.0482
-1 0 0 0.0883 -1.0000 -0.0001 0.0000 -0.0357 -0.0126 0.0073

_olex2_date_sample_data_collection 2014-02-03
_olex2_submission_special_instructions 'No special instructions were received'

data_ijsf1488
_audit_creation_date              2016-12-01
_audit_creation_method
;
Olex2 1.2
(compiled 2016.11.30 svn.r3356 for OlexSys, GUI svn.r5269)
;
_publ_contact_author_address      ?
_publ_contact_author_email        ?
_publ_contact_author_id_orcid     ?
_publ_contact_author_name         ''
_publ_contact_author_phone        ?
_publ_section_references
;
Dolomanov, O.V., Bourhis, L.J., Gildea, R.J, Howard, J.A.K. & Puschmann, H.
 (2009), J. Appl. Cryst. 42, 339-341.

Sheldrick, G.M. (2008). Acta Cryst. A64, 112-122.

Sheldrick, G.M. (2015). Acta Cryst. C71, 3-8.
;
_chemical_name_common             ?
_chemical_name_systematic         ?
_chemical_formula_moiety          'C23 H26 N2 O3'
_chemical_formula_sum             'C23 H26 N2 O3'
_chemical_formula_weight          378.46
_chemical_absolute_configuration  ad
_chemical_melting_point           ?
_chemical_oxdiff_formula          'C23 H26 N2 O3'
_chemical_oxdiff_usercomment      'Alan AJR-5-402'
loop_
  _atom_type_symbol
  _atom_type_description
  _atom_type_scat_dispersion_real
  _atom_type_scat_dispersion_imag
  _atom_type_scat_source
 'C' 'C' 0.0181 0.0091 'International Tables Vol C Tables 4.2.6.8 and 6.1.1.4'
 'H' 'H' 0.0000 0.0000 'International Tables Vol C Tables 4.2.6.8 and 6.1.1.4'
 'N' 'N' 0.0311 0.0180 'International Tables Vol C Tables 4.2.6.8 and 6.1.1.4'
 'O' 'O' 0.0492 0.0322 'International Tables Vol C Tables 4.2.6.8 and 6.1.1.4'

_shelx_space_group_comment
;
The symmetry employed for this shelxl refinement is uniquely defined
by the following loop, which should always be used as a source of
symmetry information in preference to the above space-group names.
They are only intended as comments.
;
_space_group_crystal_system       'monoclinic'
_space_group_IT_number            4
_space_group_name_H-M_alt         'P 1 21 1'
_space_group_name_Hall            'P 2yb'
loop_
  _space_group_symop_operation_xyz
 'x, y, z'
 '-x, y+1/2, -z'

_cell_length_a                    8.7152(3)
_cell_length_b                    13.5902(4)
_cell_length_c                    8.7625(3)
_cell_angle_alpha                 90
_cell_angle_beta                  100.507(3)
_cell_angle_gamma                 90
_cell_volume                      1020.44(6)
_cell_formula_units_Z             2
_cell_measurement_reflns_used     3894
_cell_measurement_temperature     110.05(10)
_cell_measurement_theta_max       70.7620
_cell_measurement_theta_min       10.2710
_shelx_estimated_absorpt_T_max    ?
_shelx_estimated_absorpt_T_min    ?
_exptl_absorpt_coefficient_mu     0.655
_exptl_absorpt_correction_T_max   0.980
_exptl_absorpt_correction_T_min   0.940
_exptl_absorpt_correction_type    gaussian
_exptl_absorpt_process_details
;
CrysAlisPro, Agilent Technologies,
Version 1.171.37.34 (release 22-05-2014 CrysAlis171 .NET)
(compiled May 22 2014,16:03:01)
Numerical absorption correction based on gaussian integration over
			a multifaceted crystal model
Empirical absorption correction using spherical harmonics,
 implemented in SCALE3 ABSPACK scaling algorithm.
;
_exptl_absorpt_special_details    ?
_exptl_crystal_colour             'clear colourless'
_exptl_crystal_colour_lustre      clear
_exptl_crystal_colour_modifier    .
_exptl_crystal_colour_primary     colourless
_exptl_crystal_density_diffrn     1.232
_exptl_crystal_density_meas       ?
_exptl_crystal_density_method     ?
_exptl_crystal_description        needle
_exptl_crystal_F_000              404
_exptl_crystal_size_max           0.2485
_exptl_crystal_size_mid           0.1431
_exptl_crystal_size_min           0.0656
_exptl_transmission_factor_max    ?
_exptl_transmission_factor_min    ?
_diffrn_reflns_av_R_equivalents   0.0256
_diffrn_reflns_av_unetI/netI      0.0341
_diffrn_reflns_Laue_measured_fraction_full 0.999
_diffrn_reflns_Laue_measured_fraction_max 0.999
_diffrn_reflns_limit_h_max        10
_diffrn_reflns_limit_h_min        -9
_diffrn_reflns_limit_k_max        16
_diffrn_reflns_limit_k_min        -16
_diffrn_reflns_limit_l_max        10
_diffrn_reflns_limit_l_min        -10
_diffrn_reflns_number             6691
_diffrn_reflns_point_group_measured_fraction_full 0.999
_diffrn_reflns_point_group_measured_fraction_max 0.999
_diffrn_reflns_theta_full         67.058
_diffrn_reflns_theta_max          67.058
_diffrn_reflns_theta_min          5.134
_diffrn_ambient_environment       N~2~
_diffrn_ambient_temperature       110.05(10)
_diffrn_detector                  'CCD plate'
_diffrn_detector_area_resol_mean  16.1450
_diffrn_detector_type             Eos
_diffrn_measured_fraction_theta_full 0.9990
_diffrn_measured_fraction_theta_max 0.9990
_diffrn_measurement_details
;
#__ type_ start__ end____ width___ exp.time_
  1 omega   -2.00   25.00   1.0000    1.0000
omega____ theta____ kappa____ phi______ frames
    -        0.0000   57.0000  120.0000 27

#__ type_ start__ end____ width___ exp.time_
  2 omega  -58.00  -31.00   1.0000    1.0000
omega____ theta____ kappa____ phi______ frames
    -        0.0000  -57.0000  -90.0000 27

#__ type_ start__ end____ width___ exp.time_
  3 omega  -29.00   43.00   1.0000    1.0000
omega____ theta____ kappa____ phi______ frames
    -        0.0000   77.0000  -60.0000 72

#__ type_ start__ end____ width___ exp.time_
  4 omega  -22.00   19.00   1.0000    1.0000
omega____ theta____ kappa____ phi______ frames
    -        0.0000  -57.0000  -90.0000 41

#__ type_ start__ end____ width___ exp.time_
  5 omega  -15.00   78.00   1.0000    4.0000
omega____ theta____ kappa____ phi______ frames
    -       54.0000  -19.0000 -120.0000 93

#__ type_ start__ end____ width___ exp.time_
  6 omega   20.00  127.00   1.0000    4.0000
omega____ theta____ kappa____ phi______ frames
    -       54.0000   19.0000  -30.0000 107

#__ type_ start__ end____ width___ exp.time_
  7 omega   -8.00   82.00   1.0000    4.0000
omega____ theta____ kappa____ phi______ frames
    -       54.0000  -77.0000   90.0000 90

#__ type_ start__ end____ width___ exp.time_
  8 omega  -17.00   40.00   1.0000    4.0000
omega____ theta____ kappa____ phi______ frames
    -       54.0000  -37.0000    0.0000 57

#__ type_ start__ end____ width___ exp.time_
  9 omega   25.00   51.00   1.0000    4.0000
omega____ theta____ kappa____ phi______ frames
    -       54.0000 -125.0000  -90.0000 26

#__ type_ start__ end____ width___ exp.time_
 10 omega   69.00   96.00   1.0000    4.0000
omega____ theta____ kappa____ phi______ frames
    -       54.0000 -125.0000  -90.0000 27

#__ type_ start__ end____ width___ exp.time_
 11 omega   38.00  124.00   1.0000    4.0000
omega____ theta____ kappa____ phi______ frames
    -       54.0000   77.0000   30.0000 86

#__ type_ start__ end____ width___ exp.time_
 12 omega   66.00  111.00   1.0000   16.0000
omega____ theta____ kappa____ phi______ frames
    -      108.0000 -111.0000  150.0000 45

#__ type_ start__ end____ width___ exp.time_
 13 omega   72.00  107.00   1.0000   16.0000
omega____ theta____ kappa____ phi______ frames
    -      108.0000 -111.0000   60.0000 35

#__ type_ start__ end____ width___ exp.time_
 14 omega   44.00   94.00   1.0000   16.0000
omega____ theta____ kappa____ phi______ frames
    -      108.0000  -25.0000 -120.0000 50

#__ type_ start__ end____ width___ exp.time_
 15 omega   87.00  119.00   1.0000   16.0000
omega____ theta____ kappa____ phi______ frames
    -      108.0000   50.0000 -120.0000 32

#__ type_ start__ end____ width___ exp.time_
 16 omega   50.00   78.00   1.0000   16.0000
omega____ theta____ kappa____ phi______ frames
    -      108.0000  -50.0000 -120.0000 28

#__ type_ start__ end____ width___ exp.time_
 17 omega  120.00  175.00   1.0000   16.0000
omega____ theta____ kappa____ phi______ frames
    -      108.0000  111.0000 -150.0000 55

#__ type_ start__ end____ width___ exp.time_
 18 omega   35.00   89.00   1.0000   16.0000
omega____ theta____ kappa____ phi______ frames
    -      108.0000  -25.0000  -60.0000 54

#__ type_ start__ end____ width___ exp.time_
 19 omega   45.00   77.00   1.0000   16.0000
omega____ theta____ kappa____ phi______ frames
    -      108.0000  -37.0000 -180.0000 32

#__ type_ start__ end____ width___ exp.time_
 20 omega   89.00  174.00   1.0000   16.0000
omega____ theta____ kappa____ phi______ frames
    -      108.0000   50.0000 -150.0000 85

#__ type_ start__ end____ width___ exp.time_
 21 omega   42.00  103.00   1.0000   16.0000
omega____ theta____ kappa____ phi______ frames
    -      108.0000  -50.0000   60.0000 61

#__ type_ start__ end____ width___ exp.time_
 22 omega  141.00  177.00   1.0000   16.0000
omega____ theta____ kappa____ phi______ frames
    -      108.0000   50.0000   60.0000 36

#__ type_ start__ end____ width___ exp.time_
 23 omega  144.00  174.00   1.0000   16.0000
omega____ theta____ kappa____ phi______ frames
    -      108.0000   63.0000  -90.0000 30

#__ type_ start__ end____ width___ exp.time_
 24 omega   90.00  134.00   1.0000   16.0000
omega____ theta____ kappa____ phi______ frames
    -      108.0000   50.0000   60.0000 44

#__ type_ start__ end____ width___ exp.time_
 25 omega   86.00  115.00   1.0000   16.0000
omega____ theta____ kappa____ phi______ frames
    -      108.0000 -111.0000  -90.0000 29

#__ type_ start__ end____ width___ exp.time_
 26 omega   42.00  127.00   1.0000   16.0000
omega____ theta____ kappa____ phi______ frames
    -      108.0000  -63.0000  -60.0000 85

#__ type_ start__ end____ width___ exp.time_
 27 omega   99.00  177.00   1.0000   16.0000
omega____ theta____ kappa____ phi______ frames
    -      108.0000   37.0000  -90.0000 78

#__ type_ start__ end____ width___ exp.time_
 28 omega  114.00  141.00   1.0000   16.0000
omega____ theta____ kappa____ phi______ frames
    -      108.0000   63.0000  -90.0000 27

#__ type_ start__ end____ width___ exp.time_
 29 omega   36.00  170.00   1.0000   16.0000
omega____ theta____ kappa____ phi______ frames
    -      108.0000   12.0000 -180.0000 134
;
_diffrn_measurement_device        'four-circle diffractometer'
_diffrn_measurement_device_type   'SuperNova, Dual, Cu at zero, Eos'
_diffrn_measurement_method        '\w scans'
_diffrn_orient_matrix_UB_11       0.0727338000
_diffrn_orient_matrix_UB_12       -0.0259487000
_diffrn_orient_matrix_UB_13       0.1689623000
_diffrn_orient_matrix_UB_21       0.0635651000
_diffrn_orient_matrix_UB_22       -0.0967750000
_diffrn_orient_matrix_UB_23       -0.0556658000
_diffrn_orient_matrix_UB_31       0.1515490000
_diffrn_orient_matrix_UB_32       0.0530049000
_diffrn_orient_matrix_UB_33       -0.0189676000
_diffrn_radiation_monochromator   mirror
_diffrn_radiation_probe           x-ray
_diffrn_radiation_type            'Cu K\a'
_diffrn_radiation_wavelength      1.54184
_diffrn_source                    'sealed X-ray tube'
_diffrn_source_type               'SuperNova (Cu) X-ray Source'
_reflns_Friedel_coverage          0.911
_reflns_Friedel_fraction_full     0.999
_reflns_Friedel_fraction_max      0.999
_reflns_number_gt                 3483
_reflns_number_total              3634
_reflns_odcompleteness_completeness 99.90
_reflns_odcompleteness_iscentric  1
_reflns_odcompleteness_theta      66.97
_reflns_special_details
;
 Reflections were merged by SHELXL according to the crystal
 class for the calculation of statistics and refinement.
 
 _reflns_Friedel_fraction is defined as the number of unique
 Friedel pairs measured divided by the number that would be
 possible theoretically, ignoring centric projections and
 systematic absences.
;
_reflns_threshold_expression      'I > 2\s(I)'
_computing_cell_refinement
;
CrysAlisPro, Agilent Technologies,
Version 1.171.37.34 (release 22-05-2014 CrysAlis171 .NET)
(compiled May 22 2014,16:03:01)
;
_computing_data_collection
;
CrysAlisPro, Agilent Technologies,
Version 1.171.37.34 (release 22-05-2014 CrysAlis171 .NET)
(compiled May 22 2014,16:03:01)
;
_computing_data_reduction
;
CrysAlisPro, Agilent Technologies,
Version 1.171.37.34 (release 22-05-2014 CrysAlis171 .NET)
(compiled May 22 2014,16:03:01)
;
_computing_molecular_graphics     'Olex2 (Dolomanov et al., 2009)'
_computing_publication_material   'Olex2 (Dolomanov et al., 2009)'
_computing_structure_refinement   'ShelXL (Sheldrick, 2015)'
_computing_structure_solution     'ShelXS (Sheldrick, 2008)'
_refine_diff_density_max          0.209
_refine_diff_density_min          -0.176
_refine_diff_density_rms          0.039
_refine_ls_abs_structure_details
;
 Flack x determined using 1605 quotients [(I+)-(I-)]/[(I+)+(I-)]
 (Parsons, Flack and Wagner, Acta Cryst. B69 (2013) 249-259).
;
_refine_ls_abs_structure_Flack    -0.09(12)
_refine_ls_extinction_coef        .
_refine_ls_extinction_method      none
_refine_ls_goodness_of_fit_ref    1.033
_refine_ls_hydrogen_treatment     mixed
_refine_ls_matrix_type            full
_refine_ls_number_parameters      266
_refine_ls_number_reflns          3634
_refine_ls_number_restraints      1
_refine_ls_R_factor_all           0.0359
_refine_ls_R_factor_gt            0.0342
_refine_ls_restrained_S_all       1.033
_refine_ls_shift/su_max           0.000
_refine_ls_shift/su_mean          0.000
_refine_ls_structure_factor_coef  Fsqd
_refine_ls_weighting_details
'w=1/[\s^2^(Fo^2^)+(0.0608P)^2^+0.0666P] where P=(Fo^2^+2Fc^2^)/3'
_refine_ls_weighting_scheme       calc
_refine_ls_wR_factor_gt           0.0893
_refine_ls_wR_factor_ref          0.0912
_refine_special_details           ?
_olex2_refinement_description
;
1. Fixed Uiso
 At 1.2 times of:
  All C(H) groups, All C(H,H) groups
 At 1.5 times of:
  All C(H,H,H) groups
2.a Ternary CH refined with riding coordinates:
 C10(H10)
2.b Secondary CH2 refined with riding coordinates:
 C9(H9A,H9B)
2.c Aromatic/amide H refined with riding coordinates:
 C2(H2A), C3(H3), C4(H4), C5(H5), C14(H14), C16(H16)
2.d Idealised Me refined as rotating group:
 C18(H18A,H18B,H18C), C19(H19A,H19B,H19C), C20(H20A,H20B,H20C), C21(H21A,H21B,
 H21C), C23(H23A,H23B,H23C)
;
_atom_sites_solution_hydrogens    mixed
_atom_sites_solution_primary      direct
_atom_sites_solution_secondary    ?
loop_
  _atom_site_label
  _atom_site_type_symbol
  _atom_site_fract_x
  _atom_site_fract_y
  _atom_site_fract_z
  _atom_site_U_iso_or_equiv
  _atom_site_adp_type
  _atom_site_occupancy
  _atom_site_site_symmetry_order
  _atom_site_calc_flag
  _atom_site_refinement_flags_posn
  _atom_site_refinement_flags_adp
  _atom_site_refinement_flags_occupancy
  _atom_site_disorder_assembly
  _atom_site_disorder_group
 O1 O 0.8915(2) 0.49378(13) 0.0911(2) 0.0299(4) Uani 1 1 d . . . . .
 O2 O 0.7414(2) 0.35849(15) 0.0807(2) 0.0330(4) Uani 1 1 d . . . . .
 O3 O 0.6999(2) 0.48984(12) 0.58359(19) 0.0271(4) Uani 1 1 d . . . . .
 N1 N 1.1348(2) 0.17033(15) 0.3626(2) 0.0240(4) Uani 1 1 d . . . . .
 N2 N 0.6949(2) 0.39138(14) 0.3763(2) 0.0220(4) Uani 1 1 d . . . . .
 C1 C 1.2179(3) 0.22227(16) 0.2714(3) 0.0219(5) Uani 1 1 d . . . . .
 C2 C 1.3355(3) 0.19165(18) 0.1927(3) 0.0249(5) Uani 1 1 d . . . . .
 H2A H 1.3677 0.1263 0.1951 0.030 Uiso 1 1 calc R . . . .
 C3 C 1.4021(3) 0.26178(19) 0.1115(3) 0.0271(5) Uani 1 1 d . . . . .
 H3 H 1.4808 0.2434 0.0584 0.032 Uiso 1 1 calc R . . . .
 C4 C 1.3531(3) 0.36059(19) 0.1074(3) 0.0262(5) Uani 1 1 d . . . . .
 H4 H 1.3994 0.4061 0.0507 0.031 Uiso 1 1 calc R . . . .
 C5 C 1.2380(3) 0.39120(17) 0.1857(3) 0.0250(5) Uani 1 1 d . . . . .
 H5 H 1.2065 0.4567 0.1819 0.030 Uiso 1 1 calc R . . . .
 C6 C 1.1689(3) 0.32194(17) 0.2714(3) 0.0218(5) Uani 1 1 d . . . . .
 C7 C 1.0556(3) 0.32722(17) 0.3707(3) 0.0212(5) Uani 1 1 d . . . . .
 C8 C 1.0376(3) 0.23320(16) 0.4238(3) 0.0212(5) Uani 1 1 d . . . . .
 C9 C 0.9824(3) 0.42113(17) 0.4142(3) 0.0222(4) Uani 1 1 d . . . . .
 H9A H 1.0516 0.4752 0.4015 0.027 Uiso 1 1 calc R . . . .
 H9B H 0.9761 0.4177 0.5235 0.027 Uiso 1 1 calc R . . . .
 C10 C 0.8174(3) 0.44591(16) 0.3217(3) 0.0228(5) Uani 1 1 d . . . . .
 H10 H 0.7984 0.5162 0.3350 0.027 Uiso 1 1 calc R . . . .
 C11 C 0.8093(3) 0.42656(18) 0.1515(3) 0.0242(5) Uani 1 1 d . . . . .
 C12 C 0.9274(3) 0.19697(16) 0.5216(3) 0.0218(5) Uani 1 1 d . . . . .
 C13 C 0.7910(3) 0.14776(16) 0.4507(3) 0.0231(5) Uani 1 1 d . . . . .
 C14 C 0.6796(3) 0.12331(16) 0.5389(3) 0.0253(5) Uani 1 1 d . . . . .
 H14 H 0.5887 0.0916 0.4917 0.030 Uiso 1 1 calc R . . . .
 C15 C 0.7010(3) 0.14529(17) 0.6964(3) 0.0276(5) Uani 1 1 d . . . . .
 C16 C 0.8397(3) 0.18912(18) 0.7666(3) 0.0286(5) Uani 1 1 d . . . . .
 H16 H 0.8566 0.2017 0.8726 0.034 Uiso 1 1 calc R . . . .
 C17 C 0.9545(3) 0.21486(17) 0.6815(3) 0.0258(5) Uani 1 1 d . . . . .
 C18 C 0.7647(3) 0.12122(19) 0.2805(3) 0.0276(5) Uani 1 1 d . . . . .
 H18A H 0.7853 0.1776 0.2213 0.041 Uiso 1 1 calc GR . . . .
 H18B H 0.6585 0.1006 0.2472 0.041 Uiso 1 1 calc GR . . . .
 H18C H 0.8336 0.0686 0.2647 0.041 Uiso 1 1 calc GR . . . .
 C19 C 0.5732(3) 0.1231(2) 0.7869(3) 0.0373(6) Uani 1 1 d . . . . .
 H19A H 0.4980 0.1754 0.7724 0.056 Uiso 1 1 calc GR . . . .
 H19B H 0.6175 0.1173 0.8952 0.056 Uiso 1 1 calc GR . . . .
 H19C H 0.5229 0.0624 0.7507 0.056 Uiso 1 1 calc GR . . . .
 C20 C 1.1056(3) 0.2592(2) 0.7626(3) 0.0346(6) Uani 1 1 d . . . . .
 H20A H 1.1915 0.2229 0.7361 0.052 Uiso 1 1 calc GR . . . .
 H20B H 1.1103 0.2567 0.8729 0.052 Uiso 1 1 calc GR . . . .
 H20C H 1.1116 0.3265 0.7307 0.052 Uiso 1 1 calc GR . . . .
 C21 C 0.9065(3) 0.4785(2) -0.0686(3) 0.0372(6) Uani 1 1 d . . . . .
 H21A H 0.8046 0.4721 -0.1316 0.056 Uiso 1 1 calc GR . . . .
 H21B H 0.9654 0.4196 -0.0764 0.056 Uiso 1 1 calc GR . . . .
 H21C H 0.9593 0.5337 -0.1039 0.056 Uiso 1 1 calc GR . . . .
 C22 C 0.6426(3) 0.41883(16) 0.5040(3) 0.0214(4) Uani 1 1 d . . . . .
 C23 C 0.5099(3) 0.36184(18) 0.5480(3) 0.0265(5) Uani 1 1 d . . . . .
 H23A H 0.5353 0.3437 0.6555 0.040 Uiso 1 1 calc GR . . . .
 H23B H 0.4918 0.3035 0.4854 0.040 Uiso 1 1 calc GR . . . .
 H23C H 0.4174 0.4018 0.5311 0.040 Uiso 1 1 calc GR . . . .
 H2 H 0.651(4) 0.347(3) 0.320(4) 0.040(9) Uiso 1 1 d . . . . .
 H1 H 1.155(4) 0.115(3) 0.394(4) 0.034(8) Uiso 1 1 d . . . . .

loop_
  _atom_site_aniso_label
  _atom_site_aniso_U_11
  _atom_site_aniso_U_22
  _atom_site_aniso_U_33
  _atom_site_aniso_U_23
  _atom_site_aniso_U_13
  _atom_site_aniso_U_12
 O1 0.0335(9) 0.0259(9) 0.0311(9) 0.0054(7) 0.0081(7) 0.0012(7)
 O2 0.0336(9) 0.0333(10) 0.0327(9) -0.0059(8) 0.0077(7) -0.0062(8)
 O3 0.0313(9) 0.0203(8) 0.0303(8) -0.0047(7) 0.0074(7) -0.0044(7)
 N1 0.0230(10) 0.0152(10) 0.0338(11) 0.0002(8) 0.0050(8) 0.0021(7)
 N2 0.0207(9) 0.0151(9) 0.0301(10) -0.0023(8) 0.0039(8) -0.0007(7)
 C1 0.0177(10) 0.0191(11) 0.0279(11) -0.0022(9) 0.0015(9) -0.0004(8)
 C2 0.0209(11) 0.0212(11) 0.0321(12) -0.0037(9) 0.0031(9) 0.0019(9)
 C3 0.0225(11) 0.0294(13) 0.0297(12) -0.0072(10) 0.0058(9) -0.0016(9)
 C4 0.0236(11) 0.0246(12) 0.0303(11) -0.0013(9) 0.0048(9) -0.0050(9)
 C5 0.0233(11) 0.0191(11) 0.0318(11) -0.0009(9) 0.0031(9) -0.0018(8)
 C6 0.0165(10) 0.0178(10) 0.0296(11) -0.0027(9) 0.0002(8) -0.0014(8)
 C7 0.0167(10) 0.0185(10) 0.0271(10) -0.0020(9) 0.0006(8) -0.0005(8)
 C8 0.0180(10) 0.0175(10) 0.0268(11) -0.0025(8) 0.0009(9) 0.0010(8)
 C9 0.0214(11) 0.0157(10) 0.0291(11) -0.0026(8) 0.0038(9) -0.0011(8)
 C10 0.0229(11) 0.0151(10) 0.0310(12) -0.0002(9) 0.0062(9) 0.0009(8)
 C11 0.0183(11) 0.0226(11) 0.0316(11) 0.0018(9) 0.0038(9) 0.0047(9)
 C12 0.0210(11) 0.0133(10) 0.0310(12) 0.0015(8) 0.0043(9) 0.0044(8)
 C13 0.0233(11) 0.0136(10) 0.0325(12) 0.0017(9) 0.0057(9) 0.0037(9)
 C14 0.0246(11) 0.0129(10) 0.0388(13) 0.0015(9) 0.0067(9) 0.0003(8)
 C15 0.0315(12) 0.0155(10) 0.0382(13) 0.0040(9) 0.0126(10) 0.0064(9)
 C16 0.0391(14) 0.0215(11) 0.0258(11) 0.0023(9) 0.0073(10) 0.0072(10)
 C17 0.0277(12) 0.0180(11) 0.0306(12) 0.0000(9) 0.0021(9) 0.0056(9)
 C18 0.0238(12) 0.0251(11) 0.0335(12) -0.0031(10) 0.0041(9) -0.0020(9)
 C19 0.0406(14) 0.0286(13) 0.0482(15) 0.0035(11) 0.0227(12) 0.0052(11)
 C20 0.0352(14) 0.0329(14) 0.0336(13) -0.0041(11) 0.0004(11) 0.0007(11)
 C21 0.0405(15) 0.0406(15) 0.0327(13) 0.0095(12) 0.0122(11) 0.0081(12)
 C22 0.0212(11) 0.0145(10) 0.0275(11) 0.0013(9) 0.0022(8) 0.0027(9)
 C23 0.0258(12) 0.0204(11) 0.0338(12) 0.0016(10) 0.0067(9) -0.0001(10)

_geom_special_details
;
 All esds (except the esd in the dihedral angle between two l.s. planes)
 are estimated using the full covariance matrix.  The cell esds are taken
 into account individually in the estimation of esds in distances, angles
 and torsion angles; correlations between esds in cell parameters are only
 used when they are defined by crystal symmetry.  An approximate (isotropic)
 treatment of cell esds is used for estimating esds involving l.s. planes.
;
loop_
  _geom_bond_atom_site_label_1
  _geom_bond_atom_site_label_2
  _geom_bond_distance
  _geom_bond_site_symmetry_2
  _geom_bond_publ_flag
 O1 C11 1.329(3) . ?
 O1 C21 1.444(3) . ?
 O2 C11 1.207(3) . ?
 O3 C22 1.241(3) . ?
 N1 C1 1.369(3) . ?
 N1 C8 1.379(3) . ?
 N1 H1 0.80(4) . ?
 N2 C10 1.450(3) . ?
 N2 C22 1.336(3) . ?
 N2 H2 0.83(4) . ?
 C1 C2 1.399(3) . ?
 C1 C6 1.420(3) . ?
 C2 H2A 0.9300 . ?
 C2 C3 1.379(4) . ?
 C3 H3 0.9300 . ?
 C3 C4 1.407(4) . ?
 C4 H4 0.9300 . ?
 C4 C5 1.379(3) . ?
 C5 H5 0.9300 . ?
 C5 C6 1.406(3) . ?
 C6 C7 1.432(3) . ?
 C7 C8 1.379(3) . ?
 C7 C9 1.507(3) . ?
 C8 C12 1.483(3) . ?
 C9 H9A 0.9700 . ?
 C9 H9B 0.9700 . ?
 C9 C10 1.553(3) . ?
 C10 H10 0.9800 . ?
 C10 C11 1.503(3) . ?
 C12 C13 1.407(3) . ?
 C12 C17 1.399(3) . ?
 C13 C14 1.387(3) . ?
 C13 C18 1.511(3) . ?
 C14 H14 0.9300 . ?
 C14 C15 1.391(4) . ?
 C15 C16 1.386(4) . ?
 C15 C19 1.511(3) . ?
 C16 H16 0.9300 . ?
 C16 C17 1.397(4) . ?
 C17 C20 1.504(4) . ?
 C18 H18A 0.9600 . ?
 C18 H18B 0.9600 . ?
 C18 H18C 0.9600 . ?
 C19 H19A 0.9600 . ?
 C19 H19B 0.9600 . ?
 C19 H19C 0.9600 . ?
 C20 H20A 0.9600 . ?
 C20 H20B 0.9600 . ?
 C20 H20C 0.9600 . ?
 C21 H21A 0.9600 . ?
 C21 H21B 0.9600 . ?
 C21 H21C 0.9600 . ?
 C22 C23 1.500(3) . ?
 C23 H23A 0.9600 . ?
 C23 H23B 0.9600 . ?
 C23 H23C 0.9600 . ?

loop_
  _geom_angle_atom_site_label_1
  _geom_angle_atom_site_label_2
  _geom_angle_atom_site_label_3
  _geom_angle
  _geom_angle_site_symmetry_1
  _geom_angle_site_symmetry_3
  _geom_angle_publ_flag
 C11 O1 C21 116.0(2) . . ?
 C1 N1 C8 109.61(19) . . ?
 C1 N1 H1 125(2) . . ?
 C8 N1 H1 124(2) . . ?
 C10 N2 H2 117(2) . . ?
 C22 N2 C10 121.16(19) . . ?
 C22 N2 H2 121(2) . . ?
 N1 C1 C2 130.4(2) . . ?
 N1 C1 C6 107.5(2) . . ?
 C2 C1 C6 122.1(2) . . ?
 C1 C2 H2A 121.2 . . ?
 C3 C2 C1 117.6(2) . . ?
 C3 C2 H2A 121.2 . . ?
 C2 C3 H3 119.4 . . ?
 C2 C3 C4 121.2(2) . . ?
 C4 C3 H3 119.4 . . ?
 C3 C4 H4 119.3 . . ?
 C5 C4 C3 121.3(2) . . ?
 C5 C4 H4 119.3 . . ?
 C4 C5 H5 120.5 . . ?
 C4 C5 C6 119.0(2) . . ?
 C6 C5 H5 120.5 . . ?
 C1 C6 C7 106.8(2) . . ?
 C5 C6 C1 118.7(2) . . ?
 C5 C6 C7 134.5(2) . . ?
 C6 C7 C9 124.5(2) . . ?
 C8 C7 C6 107.0(2) . . ?
 C8 C7 C9 128.3(2) . . ?
 N1 C8 C12 121.8(2) . . ?
 C7 C8 N1 109.1(2) . . ?
 C7 C8 C12 129.0(2) . . ?
 C7 C9 H9A 108.2 . . ?
 C7 C9 H9B 108.2 . . ?
 C7 C9 C10 116.50(18) . . ?
 H9A C9 H9B 107.3 . . ?
 C10 C9 H9A 108.2 . . ?
 C10 C9 H9B 108.2 . . ?
 N2 C10 C9 112.61(18) . . ?
 N2 C10 H10 108.0 . . ?
 N2 C10 C11 109.47(19) . . ?
 C9 C10 H10 108.0 . . ?
 C11 C10 C9 110.55(18) . . ?
 C11 C10 H10 108.0 . . ?
 O1 C11 C10 110.1(2) . . ?
 O2 C11 O1 124.8(2) . . ?
 O2 C11 C10 125.0(2) . . ?
 C13 C12 C8 119.2(2) . . ?
 C17 C12 C8 120.8(2) . . ?
 C17 C12 C13 120.0(2) . . ?
 C12 C13 C18 120.9(2) . . ?
 C14 C13 C12 119.3(2) . . ?
 C14 C13 C18 119.8(2) . . ?
 C13 C14 H14 119.3 . . ?
 C13 C14 C15 121.3(2) . . ?
 C15 C14 H14 119.3 . . ?
 C14 C15 C19 120.0(2) . . ?
 C16 C15 C14 118.7(2) . . ?
 C16 C15 C19 121.3(2) . . ?
 C15 C16 H16 119.3 . . ?
 C15 C16 C17 121.5(2) . . ?
 C17 C16 H16 119.3 . . ?
 C12 C17 C20 121.1(2) . . ?
 C16 C17 C12 119.0(2) . . ?
 C16 C17 C20 119.9(2) . . ?
 C13 C18 H18A 109.5 . . ?
 C13 C18 H18B 109.5 . . ?
 C13 C18 H18C 109.5 . . ?
 H18A C18 H18B 109.5 . . ?
 H18A C18 H18C 109.5 . . ?
 H18B C18 H18C 109.5 . . ?
 C15 C19 H19A 109.5 . . ?
 C15 C19 H19B 109.5 . . ?
 C15 C19 H19C 109.5 . . ?
 H19A C19 H19B 109.5 . . ?
 H19A C19 H19C 109.5 . . ?
 H19B C19 H19C 109.5 . . ?
 C17 C20 H20A 109.5 . . ?
 C17 C20 H20B 109.5 . . ?
 C17 C20 H20C 109.5 . . ?
 H20A C20 H20B 109.5 . . ?
 H20A C20 H20C 109.5 . . ?
 H20B C20 H20C 109.5 . . ?
 O1 C21 H21A 109.5 . . ?
 O1 C21 H21B 109.5 . . ?
 O1 C21 H21C 109.5 . . ?
 H21A C21 H21B 109.5 . . ?
 H21A C21 H21C 109.5 . . ?
 H21B C21 H21C 109.5 . . ?
 O3 C22 N2 121.6(2) . . ?
 O3 C22 C23 120.5(2) . . ?
 N2 C22 C23 117.9(2) . . ?
 C22 C23 H23A 109.5 . . ?
 C22 C23 H23B 109.5 . . ?
 C22 C23 H23C 109.5 . . ?
 H23A C23 H23B 109.5 . . ?
 H23A C23 H23C 109.5 . . ?
 H23B C23 H23C 109.5 . . ?

loop_
  _geom_hbond_atom_site_label_D
  _geom_hbond_atom_site_label_H
  _geom_hbond_atom_site_label_A
  _geom_hbond_distance_DH
  _geom_hbond_distance_HA
  _geom_hbond_distance_DA
  _geom_hbond_angle_DHA
  _geom_hbond_site_symmetry_A
 N2 H2 O2 0.83(4) 2.37(3) 2.730(3) 107(3) .
 N1 H1 O3 0.80(4) 2.11(4) 2.840(3) 151(3) 2_746

loop_
  _geom_torsion_atom_site_label_1
  _geom_torsion_atom_site_label_2
  _geom_torsion_atom_site_label_3
  _geom_torsion_atom_site_label_4
  _geom_torsion
  _geom_torsion_site_symmetry_1
  _geom_torsion_site_symmetry_2
  _geom_torsion_site_symmetry_3
  _geom_torsion_site_symmetry_4
  _geom_torsion_publ_flag
 N1 C1 C2 C3 -178.4(2) . . . . ?
 N1 C1 C6 C5 179.7(2) . . . . ?
 N1 C1 C6 C7 1.5(2) . . . . ?
 N1 C8 C12 C13 -74.9(3) . . . . ?
 N1 C8 C12 C17 107.8(3) . . . . ?
 N2 C10 C11 O1 163.90(17) . . . . ?
 N2 C10 C11 O2 -17.9(3) . . . . ?
 C1 N1 C8 C7 0.7(3) . . . . ?
 C1 N1 C8 C12 177.0(2) . . . . ?
 C1 C2 C3 C4 -0.2(4) . . . . ?
 C1 C6 C7 C8 -1.1(3) . . . . ?
 C1 C6 C7 C9 174.9(2) . . . . ?
 C2 C1 C6 C5 1.9(3) . . . . ?
 C2 C1 C6 C7 -176.3(2) . . . . ?
 C2 C3 C4 C5 0.7(4) . . . . ?
 C3 C4 C5 C6 0.2(4) . . . . ?
 C4 C5 C6 C1 -1.4(3) . . . . ?
 C4 C5 C6 C7 176.2(2) . . . . ?
 C5 C6 C7 C8 -178.9(3) . . . . ?
 C5 C6 C7 C9 -2.9(4) . . . . ?
 C6 C1 C2 C3 -1.1(3) . . . . ?
 C6 C7 C8 N1 0.3(3) . . . . ?
 C6 C7 C8 C12 -175.7(2) . . . . ?
 C6 C7 C9 C10 99.1(3) . . . . ?
 C7 C8 C12 C13 100.6(3) . . . . ?
 C7 C8 C12 C17 -76.7(3) . . . . ?
 C7 C9 C10 N2 79.6(2) . . . . ?
 C7 C9 C10 C11 -43.2(3) . . . . ?
 C8 N1 C1 C2 176.2(2) . . . . ?
 C8 N1 C1 C6 -1.4(3) . . . . ?
 C8 C7 C9 C10 -85.8(3) . . . . ?
 C8 C12 C13 C14 -172.99(19) . . . . ?
 C8 C12 C13 C18 7.1(3) . . . . ?
 C8 C12 C17 C16 173.0(2) . . . . ?
 C8 C12 C17 C20 -8.2(3) . . . . ?
 C9 C7 C8 N1 -175.5(2) . . . . ?
 C9 C7 C8 C12 8.6(4) . . . . ?
 C9 C10 C11 O1 -71.5(2) . . . . ?
 C9 C10 C11 O2 106.7(3) . . . . ?
 C10 N2 C22 O3 -2.4(3) . . . . ?
 C10 N2 C22 C23 176.8(2) . . . . ?
 C12 C13 C14 C15 -0.9(3) . . . . ?
 C13 C12 C17 C16 -4.2(3) . . . . ?
 C13 C12 C17 C20 174.6(2) . . . . ?
 C13 C14 C15 C16 -2.5(3) . . . . ?
 C13 C14 C15 C19 176.4(2) . . . . ?
 C14 C15 C16 C17 2.5(4) . . . . ?
 C15 C16 C17 C12 0.8(3) . . . . ?
 C15 C16 C17 C20 -178.0(2) . . . . ?
 C17 C12 C13 C14 4.3(3) . . . . ?
 C17 C12 C13 C18 -175.6(2) . . . . ?
 C18 C13 C14 C15 179.0(2) . . . . ?
 C19 C15 C16 C17 -176.3(2) . . . . ?
 C21 O1 C11 O2 -4.1(3) . . . . ?
 C21 O1 C11 C10 174.2(2) . . . . ?
 C22 N2 C10 C9 79.0(2) . . . . ?
 C22 N2 C10 C11 -157.6(2) . . . . ?

_shelx_res_file
;
    ijsf1488.res created by SHELXL-2014/7

TITL ijsf1488 in P21 #4
REM reset to P21 #4
CELL 1.54184 8.715158 13.590209 8.762498 90 100.5067 90
ZERR 2 0.000279 0.000402 0.0003 0 0.0032 0
LATT -1
SYMM -X,0.5+Y,-Z
SFAC C H N O
UNIT 46 52 4 6
EQIV $1 2-X,-0.5+Y,1-Z

L.S. 8
PLAN  20
HTAB N1 O3_$1
HTAB N2 O2
BOND
MORE -1
BOND $H
CONF
fmap 2
acta
REM <olex2.extras>
REM <HklSrc "%.\\ijsf1488.hkl">
REM </olex2.extras>

WGHT    0.060800    0.066600
FVAR       9.49454
O1    4    0.891515    0.493779    0.091115    11.00000    0.03348    0.02594 =
         0.03109    0.00543    0.00806    0.00117
O2    4    0.741363    0.358490    0.080680    11.00000    0.03365    0.03327 =
         0.03273   -0.00592    0.00765   -0.00620
O3    4    0.699913    0.489842    0.583592    11.00000    0.03126    0.02030 =
         0.03027   -0.00466    0.00744   -0.00436
N1    3    1.134817    0.170333    0.362639    11.00000    0.02300    0.01517 =
         0.03381    0.00023    0.00502    0.00211
N2    3    0.694881    0.391384    0.376272    11.00000    0.02067    0.01510 =
         0.03011   -0.00229    0.00391   -0.00072
C1    1    1.217899    0.222266    0.271353    11.00000    0.01771    0.01911 =
         0.02794   -0.00221    0.00152   -0.00042
C2    1    1.335539    0.191647    0.192725    11.00000    0.02093    0.02117 =
         0.03208   -0.00368    0.00315    0.00187
AFIX  43
H2A   2    1.367730    0.126332    0.195150    11.00000   -1.20000
AFIX   0
C3    1    1.402091    0.261778    0.111469    11.00000    0.02247    0.02941 =
         0.02971   -0.00716    0.00577   -0.00164
AFIX  43
H3    2    1.480773    0.243437    0.058399    11.00000   -1.20000
AFIX   0
C4    1    1.353133    0.360587    0.107381    11.00000    0.02355    0.02463 =
         0.03033   -0.00133    0.00479   -0.00496
AFIX  43
H4    2    1.399358    0.406145    0.050739    11.00000   -1.20000
AFIX   0
C5    1    1.237993    0.391204    0.185682    11.00000    0.02329    0.01909 =
         0.03181   -0.00086    0.00314   -0.00177
AFIX  43
H5    2    1.206494    0.456679    0.181854    11.00000   -1.20000
AFIX   0
C6    1    1.168938    0.321942    0.271388    11.00000    0.01648    0.01780 =
         0.02956   -0.00273    0.00016   -0.00141
C7    1    1.055596    0.327215    0.370659    11.00000    0.01665    0.01853 =
         0.02708   -0.00203    0.00059   -0.00049
C8    1    1.037572    0.233204    0.423775    11.00000    0.01801    0.01751 =
         0.02684   -0.00247    0.00088    0.00096
C9    1    0.982379    0.421132    0.414187    11.00000    0.02138    0.01568 =
         0.02912   -0.00264    0.00382   -0.00108
AFIX  23
H9A   2    1.051590    0.475210    0.401468    11.00000   -1.20000
H9B   2    0.976115    0.417701    0.523453    11.00000   -1.20000
AFIX   0
C10   1    0.817356    0.445911    0.321730    11.00000    0.02289    0.01511 =
         0.03103   -0.00017    0.00621    0.00090
AFIX  13
H10   2    0.798438    0.516212    0.334958    11.00000   -1.20000
AFIX   0
C11   1    0.809258    0.426561    0.151516    11.00000    0.01827    0.02262 =
         0.03157    0.00179    0.00378    0.00475
C12   1    0.927449    0.196968    0.521566    11.00000    0.02098    0.01335 =
         0.03104    0.00154    0.00433    0.00439
C13   1    0.790976    0.147758    0.450680    11.00000    0.02325    0.01363 =
         0.03251    0.00172    0.00565    0.00366
C14   1    0.679568    0.123315    0.538856    11.00000    0.02456    0.01289 =
         0.03883    0.00149    0.00670    0.00025
AFIX  43
H14   2    0.588662    0.091587    0.491711    11.00000   -1.20000
AFIX   0
C15   1    0.701030    0.145290    0.696380    11.00000    0.03151    0.01548 =
         0.03820    0.00401    0.01255    0.00643
C16   1    0.839689    0.189120    0.766555    11.00000    0.03907    0.02152 =
         0.02584    0.00232    0.00735    0.00719
AFIX  43
H16   2    0.856630    0.201662    0.872640    11.00000   -1.20000
AFIX   0
C17   1    0.954513    0.214865    0.681513    11.00000    0.02772    0.01799 =
         0.03059    0.00005    0.00206    0.00562
C18   1    0.764689    0.121219    0.280463    11.00000    0.02379    0.02512 =
         0.03355   -0.00314    0.00409   -0.00198
AFIX 137
H18A  2    0.785259    0.177570    0.221267    11.00000   -1.50000
H18B  2    0.658480    0.100628    0.247225    11.00000   -1.50000
H18C  2    0.833625    0.068594    0.264738    11.00000   -1.50000
AFIX   0
C19   1    0.573216    0.123088    0.786925    11.00000    0.04056    0.02861 =
         0.04821    0.00349    0.02269    0.00523
AFIX 137
H19A  2    0.498022    0.175449    0.772437    11.00000   -1.50000
H19B  2    0.617489    0.117276    0.895191    11.00000   -1.50000
H19C  2    0.522940    0.062435    0.750669    11.00000   -1.50000
AFIX   0
C20   1    1.105650    0.259241    0.762643    11.00000    0.03516    0.03294 =
         0.03363   -0.00411    0.00042    0.00075
AFIX 137
H20A  2    1.191518    0.222874    0.736141    11.00000   -1.50000
H20B  2    1.110254    0.256683    0.872871    11.00000   -1.50000
H20C  2    1.111637    0.326486    0.730695    11.00000   -1.50000
AFIX   0
C21   1    0.906458    0.478508   -0.068575    11.00000    0.04055    0.04064 =
         0.03266    0.00949    0.01225    0.00807
AFIX 137
H21A  2    0.804621    0.472070   -0.131601    11.00000   -1.50000
H21B  2    0.965389    0.419634   -0.076437    11.00000   -1.50000
H21C  2    0.959301    0.533667   -0.103869    11.00000   -1.50000
AFIX   0
C22   1    0.642577    0.418835    0.504007    11.00000    0.02123    0.01453 =
         0.02754    0.00134    0.00219    0.00273
C23   1    0.509854    0.361845    0.547953    11.00000    0.02584    0.02038 =
         0.03384    0.00164    0.00671   -0.00014
AFIX 137
H23A  2    0.535322    0.343747    0.655503    11.00000   -1.50000
H23B  2    0.491837    0.303531    0.485416    11.00000   -1.50000
H23C  2    0.417434    0.401770    0.531074    11.00000   -1.50000
AFIX   0
H2    2    0.651252    0.346904    0.319732    11.00000    0.04001
H1    2    1.155451    0.115448    0.394004    11.00000    0.03413
HKLF 4

REM  ijsf1488 in P21 #4
REM R1 =  0.0342 for    3483 Fo > 4sig(Fo)  and  0.0359 for all    3634 data
REM    266 parameters refined using      1 restraints

END

WGHT      0.0608      0.0666

REM Highest difference peak  0.209,  deepest hole -0.176,  1-sigma level  0.039
Q1    1   0.6058  0.4176  0.3829  11.00000  0.05    0.21
Q2    1   0.9694  0.1962  0.6127  11.00000  0.05    0.19
Q3    1   0.9209  0.2186  0.5908  11.00000  0.05    0.19
Q4    1   0.8913  0.4333  0.3706  11.00000  0.05    0.18
Q5    1   1.0639  0.3241  0.2653  11.00000  0.05    0.17
Q6    1   0.7105  0.1204  0.6247  11.00000  0.05    0.17
Q7    1   0.7327  0.3866  0.4753  11.00000  0.05    0.17
Q8    1   0.7246  0.4867  0.7014  11.00000  0.05    0.16
Q9    1   0.7971  0.1317  0.3722  11.00000  0.05    0.16
Q10   1   0.8291  0.4356  0.2459  11.00000  0.05    0.16
Q11   1   0.7935  0.1464  0.7363  11.00000  0.05    0.15
Q12   1   0.6417  0.1285  0.7496  11.00000  0.05    0.15
Q13   1   0.8617  0.1632  0.4882  11.00000  0.05    0.15
Q14   1   1.3260  0.2079  0.3026  11.00000  0.05    0.15
Q15   1   0.8354  0.4910 -0.0124  11.00000  0.05    0.14
Q16   1   0.6415  0.3560  0.0132  11.00000  0.05    0.13
Q17   1   0.7547  0.1278  0.5048  11.00000  0.05    0.13
Q18   1   0.9732  0.2199  0.4651  11.00000  0.05    0.13
Q19   1   0.7099  0.3611 -0.0333  11.00000  0.05    0.13
Q20   1   1.0158  0.2371  0.7167  11.00000  0.05    0.13
;
_shelx_res_checksum               51801
_shelx_hkl_file
;
   0 -16   0 6284.88 232.003  27
   0 -16  -1 91.2218 45.2564  27
   0 -16   1 86.9505 48.9224  27
   0 -15   0-13.6376 63.7215  27
   0 -15  -1 4931.30 234.855  27
   0 -15   1 5420.95 245.644  15
   0 -15   2 6984.13 286.002  15
   0 -15  -2 6690.39 265.839  27
   0 -15   3 1441.56 123.960  15
   0 -14   0 21391.6 638.906  15
   0 -14  -1 230.192 81.2086  27
   0 -14   1 278.951 85.4587  15
   0 -14   2 10772.7 424.954  15
   0 -14  -2 11024.1 400.218  27
   0 -14   3 10215.3 414.445  15
   0 -14  -3 11224.7 381.871  27
   0 -14   4 2232.27 169.926  15
   0 -14   5 9994.23 351.782  15
   0 -14  -5 10496.7 322.038  28
   0 -13   0 66.0991 85.4122  15
   0 -13   1 2990.69 226.614  15
   0 -13   2 24065.7 771.785  15
   0 -13  -2 25781.8 739.343  27
   0 -13  -3 549.122 101.992  27
   0 -13   3 128.868 90.5650  15
   0 -13  -4 15372.3 487.838  27
   0 -13   5 9475.15 351.341  20
   0 -13   6 592.481 80.9652  20
   0 -13   6 389.768 80.4019  15
   0 -13  -6 564.515 72.0566  28
   0 -12   0 1613.94 163.226  15
   0 -12   0 1415.31 308.904   6
   0 -12   1 6840.92 354.285  15
   0 -12   1 8195.87 745.908   6
   0 -12  -1 8270.03 719.567   6
   0 -12  -2 3860.39 243.216  27
   0 -12  -3 10488.2 415.514  27
   0 -12   4 7820.29 368.103  20
   0 -12  -4 8953.29 361.917  27
   0 -12   5 3416.86 227.001  20
   0 -12  -6 3122.18 175.055  28
   0 -12   6 3090.98 200.172  20
   0 -11   0-32.6481 77.3049  15
   0 -11   0 384.623 218.842   6
   0 -11   1 4963.29 576.097   6
   0 -11  -1 4857.32 543.360   6
   0 -11  -2 5116.24 280.044  27
   0 -11   2 5513.33 622.433   6
   0 -11  -2 5380.45 582.358   6
   0 -11   3 21167.7 1299.93   6
   0 -11  -3 24289.8 1297.12   6
   0 -11  -3 23563.2 709.934  27
   0 -11  -4 7439.46 339.511  27
   0 -11   4 6987.91 364.921  20
   0 -11   5 10022.9 445.456  20
   0 -11  -5 10463.8 405.530  27
   0 -11   6 2226.21 191.340  20
   0 -11  -6 2231.52 164.564  28
   0 -11  -7 2982.07 157.875  28
   0 -11   7 2793.41 188.325  20
   0 -10   0 10758.8 792.388   6
   0 -10   1 30753.3 1467.72   6
   0 -10  -1 31310.7 1421.04   6
   0 -10  -2 5283.97 555.683   6
   0 -10   2 4550.01 560.946   6
   0 -10  -3 3770.66 231.156  27
   0 -10   3 3388.80 238.919  20
   0 -10  -3 4238.17 516.956   6
   0 -10  -4 10955.4 430.184  27
   0 -10   4 10378.4 462.600  20
   0 -10  -4 11643.5 873.641   6
   0 -10   5 7263.29 384.361  20
   0 -10  -5 7600.13 344.176  27
   0 -10   6 3074.54 247.064  20
   0 -10  -6 3005.49 204.067  28
   0 -10   7 14472.6 513.301  20
   0 -10  -7 13812.1 432.575  28
   0 -10   8 316.065 82.0288  20
   0  -9   0-94.5097 136.941   6
   0  -9  -1 9217.01 684.847   6
   0  -9   1 9463.60 728.176   6
   0  -9  -2 24640.9 1188.95   6
   0  -9  -3 14423.7 920.524   6
   0  -9  -4 9815.34 787.638   6
   0  -9  -4 9397.58 384.384  27
   0  -9  -5 6270.62 311.499  27
   0  -9  -5 6949.58 666.677   6
   0  -9  -6 7232.36 323.934  28
   0  -9  -7 3621.90 204.961  28
   0  -9   7 3448.89 262.513  20
   0  -9   8 22241.3 654.483  20
   0  -8   0 67576.8 2126.57   6
   0  -8  -1 15594.7 846.395   6
   0  -8  -2 18296.0 946.490   6
   0  -8  -3 6609.29 573.751   6
   0  -8  -4 4890.56 539.570   6
   0  -8  -5 8957.91 746.022   6
   0  -8  -5 7878.54 351.982  27
   0  -8  -6 37611.4 1004.59  27
   0  -8  -6 38161.5 988.044  28
   0  -8  -7 1199.91 130.837  28
   0  -8   8 6276.21 322.373  20
   0  -7   0 493.823 176.905   6
   0  -7  -1 329.492 186.662   6
   0  -7  -2 74010.2 2163.59   6
   0  -7  -3 12088.6 748.085   6
   0  -7  -4 20163.8 1048.33   6
   0  -7  -5 1964.68 346.920   6
   0  -7  -6 948.971 131.703  27
   0  -7  -6 1241.55 139.379  28
   0  -7  -6 1029.05 287.654   6
   0  -7   7 7612.30 372.934  29
   0  -7   8 5462.05 289.103  29
   0  -7   9 2778.27 181.792  20
   0  -6   0 42968.0 1393.09   6
   0  -6  -1 2536.60 289.879   6
   0  -6  -2 2367.71 285.505   6
   0  -6  -3 16741.5 831.461   6
   0  -6  -4 7401.70 591.616   6
   0  -6  -5 2564.83 380.030   6
   0  -6  -6 7815.90 349.649  27
   0  -6  -6 8272.21 336.415  28
   0  -6  -6 7693.02 687.572   6
   0  -6   6 7115.81 370.503  29
   0  -6  -7 6927.27 338.463  27
   0  -6   7 7145.10 371.422  29
   0  -6   8 1186.88 153.158  29
   0  -6   9 378.152 95.8261  20
   0  -6   9 426.768 94.9005  29
   0  -5   0 13.0785 147.517   3
   0  -5  -1 30899.7 1022.30   6
   0  -5   1 27284.9 865.649   8
   0  -5   1 31728.8 1704.19   3
   0  -5  -1 32910.2 1723.22   3
   0  -5  -2 3957.90 329.944   6
   0  -5   2 2928.41 279.947   8
   0  -5  -3 31367.4 1134.55   6
   0  -5  -4 56409.9 1806.62   6
   0  -5  -5 1625.95 311.624   6
   0  -5  -6 27280.8 1331.43   6
   0  -5  -7 4422.99 269.737  27
   0  -5  -7 4410.54 552.779   6
   0  -5   7 4477.82 292.635  29
   0  -5   8 6726.59 356.746  29
   0  -5   9 2865.10 206.101  29
   0  -4   0 707527. 14691.6   1
   0  -4   0 724073. 15282.6   3
   0  -4   1 149041. 4194.09   3
   0  -4  -1 142491. 3264.05   6
   0  -4  -1 142091. 4555.98   2
   0  -4  -2-113.812 206.935   2
   0  -4  -2 18.5870 79.2200   6
   0  -4  -3 17134.6 738.148   6
   0  -4  -4 3143.98 347.683   6
   0  -4  -5 2235.04 331.460   6
   0  -4  -6 21741.9 1144.55   6
   0  -4   7 3038.94 246.214  29
   0  -4  -7 2935.85 447.801   6
   0  -4  -7 2869.93 212.422  27
   0  -4   8 2957.74 241.510  29
   0  -4  -8 2601.66 208.991  27
   0  -4   9 818.746 137.600  29
   0  -3   0 44.1351 148.196   3
   0  -3   0-6.57398 111.496   1
   0  -3  -1 161228. 4555.89   2
   0  -3  -2 4520.98 649.450   2
   0  -3  -2 4352.12 285.829   6
   0  -3  -3 9855.52 1067.69   2
   0  -3  -3 10690.4 532.079   6
   0  -3  -4 8324.41 530.740   6
   0  -3  -5 16774.7 873.849   6
   0  -3  -6 3453.09 444.876   6
   0  -3  -7 3520.35 488.421   6
   0  -3   7 3110.61 249.824  29
   0  -3  -7 2889.92 220.060  27
   0  -3   8 96.2617 101.779  29
   0  -3  -8-48.2195 87.5705  27
   0  -3   9 403.687 114.548  29
   0  -3  10 28.7203 62.4246  29
   0  -2   0 157502. 3889.56   2
   0  -2  -1 63268.4 2160.05   2
   0  -2   2 262325. 5486.46   5
   0  -2   3 234.098 122.776   5
   0  -2  -3 118.940 80.4369   6
   0  -2  -4 139518. 3241.21   6
   0  -2   4 129536. 3294.26   5
   0  -2  -5 1315.63 249.458   6
   0  -2   5 868.193 233.265   5
   0  -2  -6 1488.25 295.155   6
   0  -2   6 1347.60 286.046   5
   0  -2   7 1409.07 180.520  29
   0  -2  -7 1284.03 152.338  27
   0  -2  -7 1590.47 348.812   6
   0  -2   8 5857.32 355.632  29
   0  -2   9 3764.98 267.330  29
   0  -2  10 931.508 116.827  29
   0  -1  -1 389510. 8362.50   4
   0  -1  -2 42551.9 1669.33   4
   0  -1   3 112753. 2698.18   5
   0  -1  -3 117461. 2653.31   6
   0  -1  -3 112594. 3595.88   4
   0  -1   4 19710.1 850.923   5
   0  -1  -4 20649.2 819.401   6
   0  -1   5 31474.7 1272.67   5
   0  -1  -5 32108.2 1223.34   6
   0  -1  -6 1805.50 310.097   6
   0  -1   6 2164.74 351.435   5
   0  -1   7 12477.1 934.878   5
   0  -1  -7 12838.5 494.368  27
   0  -1   7 13759.8 555.394  29
   0  -1  -7 13706.0 918.323   6
   0  -1   8 8733.97 443.165  29
   0  -1   9 1752.70 199.939  29
   0  -1  10 5361.72 267.024  29
   0   0  -1 282031. 5966.46   4
   0   0  -2 16636.1 868.011   4
   0   0   3 28011.5 935.578   5
   0   0  -3 26626.0 1374.79   4
   0   0  -3 28887.3 893.653   6
   0   0   4 7280.61 491.074   5
   0   0  -4 7301.70 455.389   6
   0   0   5 28773.8 1205.44   5
   0   0  -5 29402.8 1154.55   6
   0   0   6 36704.6 1572.07   5
   0   0  -6 41504.8 1565.52   6
   0   0   7 3291.40 260.658  29
   0   0   7 2756.57 447.080   5
   0   0   8 370.575 133.587  29
   0   0   9 103.674 112.357  29
   0   0  10 1715.39 157.889  29
   0   1   1 388602. 8178.05   3
   0   1   2 45444.4 1726.49   4
   0   1  -3 105110. 2543.74   7
   0   1   3 116374. 2684.55   5
   0   1  -3 118506. 2610.93   6
   0   1  -3 106934. 3236.25   4
   0   1  -4 19849.0 802.244   6
   0   1  -4 17546.1 716.721   7
   0   1   4 19810.2 857.695   5
   0   1  -5 31763.1 1221.56   6
   0   1   5 31805.9 1296.88   5
   0   1   6 1726.09 320.697   5
   0   1   7 14011.1 991.139   5
   0   1  -7 12433.4 523.941  21
   0   1   7 13839.5 557.461  14
   0   1   7 13747.1 560.362  29
   0   1   8 9623.13 469.483  29
   0   1   8 8366.27 443.534  14
   0   1   9 1623.43 192.248  29
   0   1  10 5112.88 265.386  29
   0   2   0 156080. 3688.28   3
   0   2   1 63710.6 1946.10   3
   0   2   2 239772. 6091.69   3
   0   2   2 271437. 6445.88   4
   0   2   3 81.6882 102.259   5
   0   2   3 28.2818 167.418   3
   0   2   4 138887. 3428.94   5
   0   2   5 986.463 246.549   5
   0   2   6 1721.06 351.477   5
   0   2  -7 1239.53 168.572  21
   0   2   7 1407.26 186.590  29
   0   2   7 1396.47 174.863  14
   0   2   7 1392.18 324.219   5
   0   2   8 5680.34 358.247  14
   0   2   8 5976.25 366.369  29
   0   2   9 3840.08 277.308  29
   0   2  10 1006.71 128.834  29
   0   3   0 354.289 180.095   3
   0   3  -1 167560. 4305.42   2
   0   3  -1 161457. 3458.88  11
   0   3   1 153637. 4155.62   3
   0   3   1 162564. 3480.55  11
   0   3  -2 3815.13 248.601  11
   0   3   2 3530.63 503.493   3
   0   3   3 10508.7 571.906   5
   0   3  -3 9764.01 431.085  11
   0   3   3 10254.6 1085.47   4
   0   3   4 9289.64 607.508   5
   0   3   5 16874.0 951.651   5
   0   3   6 3146.62 452.846   5
   0   3   7 2881.41 473.539   5
   0   3  -7 2704.40 238.548  21
   0   3   7 2988.38 251.596  29
   0   3   7 3147.58 249.492  14
   0   3   8 68.9013 107.429  14
   0   3   8 45.0147 109.852  29
   0   3   9 418.268 122.165  14
   0   3   9 388.094 119.873  29
   0   3  10 97.6433 76.1265  29
   0   4   0 724243. 15638.4   2
   0   4   0 695161. 15229.3   3
   0   4   1 143784. 3230.60  11
   0   4  -1 143871. 4260.21   2
   0   4   1 137218. 4078.17   3
   0   4  -1 145717. 3216.83  11
   0   4   2 58.8285 215.731   4
   0   4   2-46.9884 110.236   5
   0   4  -2 70.4198 89.2807  11
   0   4   2 164.624 196.436   3
   0   4   3 17410.7 806.393   5
   0   4  -3 15887.2 638.317  11
   0   4   4 3270.30 389.116   5
   0   4   5 1931.99 340.223   5
   0   4   6 23492.3 1300.90   5
   0   4   7 2688.29 458.760   5
   0   4   7 2712.93 244.985  29
   0   4   7 2617.34 242.548  14
   0   4   8 2991.71 259.204  14
   0   4   8 2576.48 244.765  29
   0   4   9 822.367 144.547  14
   0   4   9 781.907 139.956  29
   0   5   0-25.2201 108.142  11
   0   5   1 28814.1 1644.51   3
   0   5  -1 31592.0 1821.25   2
   0   5   1 29443.1 932.830   9
   0   5   1 31717.1 1994.48   4
   0   5   1 30223.6 1031.32  11
   0   5  -1 31743.2 1015.80  11
   0   5   2 3697.87 358.083   5
   0   5  -2 3896.58 320.024  11
   0   5  -2 2783.38 548.367   2
   0   5  -3 29049.4 1021.56  11
   0   5   3 32252.4 1229.21   5
   0   5   4 55958.5 1912.82   5
   0   5   5 1474.55 328.647   5
   0   5   6 27042.4 859.910  29
   0   5   6 29614.2 1493.86   5
   0   5   7 4849.35 326.719  29
   0   5   7 4713.38 620.310   5
   0   5   7 4664.62 328.215  14
   0   5   8 6499.34 376.335  29
   0   5   8 7019.21 386.518  14
   0   5   9 2818.87 217.463  29
   0   5   9 3085.38 236.294  14
   0   6   0 45001.8 1410.58  11
   0   6   1 2007.98 224.545   9
   0   6  -1 2183.62 267.625  11
   0   6  -2 2062.47 270.963  11
   0   6   2 2284.25 310.784   5
   0   6  -3 16352.9 775.353  11
   0   6   3 18194.9 938.916   5
   0   6   4 7211.49 633.877   5
   0   6   5 2375.61 403.528   5
   0   6   6 7410.90 376.636  22
   0   6   6 7941.38 404.879  29
   0   6   7 7689.17 414.619  14
   0   6   7 7150.96 396.077  29
   0   6   8 1140.54 168.180  29
   0   6   8 1416.61 178.291  14
   0   6   9 376.053 98.8924  29
   0   6   9 578.602 119.519  14
   0   7   0 15.4495 134.064  11
   0   7  -1 200.546 149.023  11
   0   7   1 98.7978 96.1224   9
   0   7  -2 73102.7 2147.65  11
   0   7   2 74409.0 2268.76   5
   0   7  -3 11868.1 701.613  11
   0   7   3 12934.2 844.408   5
   0   7   4 20240.1 1142.13   5
   0   7   5 2098.67 409.565   5
   0   7   6 1113.35 165.810  29
   0   7   6 669.686 301.552   5
   0   7   6 1195.48 162.020  22
   0   7   7 7987.73 412.113  29
   0   7   7 8948.19 441.296  14
   0   7   8 6281.17 346.472  14
   0   7   8 5766.07 320.858  29
   0   7   9 3005.09 204.408  14
   0   7   9 2569.33 173.865  29
   0   8   0 64609.5 2000.22   9
   0   8   0 66971.7 2074.30  11
   0   8  -1 15711.9 854.749  11
   0   8  -2 17426.4 914.434  11
   0   8   2 17749.1 1005.38   5
   0   8   3 6485.83 638.959   5
   0   8  -3 5842.48 521.832  11
   0   8   4 4498.20 554.573   5
   0   8   5 8187.95 408.198  22
   0   8   5 9044.73 813.556   5
   0   8   6 37595.7 1075.30  22
   0   8   6 36584.5 1061.06  29
   0   8   7 1363.94 192.819  14
   0   8   7 1292.62 168.318  29
   0   8   8 6519.44 344.252  14
   0   8   8 5624.70 292.352  29
   0   9   0 97.6509 164.609   9
   0   9  -1 8645.30 699.015   9
   0   9  -1 8941.71 683.179  11
   0   9  -2 23198.6 1160.39  11
   0   9   2 24709.5 1269.76   5
   0   9   3 14766.9 1002.79   5
   0   9  -3 13838.1 870.486  11
   0   9   4 9662.58 448.030  22
   0   9   4 9807.28 858.182   5
   0   9   5 6759.71 730.419   5
   0   9  -5 6265.19 688.208   9
   0   9   5 6127.75 358.678  22
   0   9   6 7175.38 387.196  22
   0   9   7 3658.37 265.838  14
   0   9   8 21669.7 669.002  14
   0  10   0 9969.12 731.101   9
   0  10  -1 29220.3 1387.04   9
   0  10   1 29730.6 1425.00   5
   0  10  -2 5425.63 609.342   9
   0  10   2 5171.27 602.139   5
   0  10  -3 4025.20 550.589   9
   0  10   3 3492.23 268.684  19
   0  10   3 4262.67 563.822   5
   0  10   3 3893.56 277.545  22
   0  10   4 11458.0 505.723  22
   0  10  -4 11363.6 945.253   9
   0  10   4 11472.5 937.806   5
   0  10   5 7680.88 407.626  22
   0  10   6 3076.22 253.624  22
   0  10   7 15490.3 560.436  14
   0  10   8 246.068 81.4069  14
   0  11   0 1.74108 100.440  19
   0  11  -1 3661.46 478.630   9
   0  11   1 4242.97 295.596  19
   0  11   1 4816.27 574.811   5
   0  11  -2 5415.94 624.634   9
   0  11   2 5495.50 641.986   5
   0  11   2 5159.20 327.390  19
   0  11   3 23356.7 777.209  22
   0  11  -3 21832.4 1325.25   9
   0  11   3 22399.0 1332.79   5
   0  11   4 7765.42 412.646  22
   0  11   5 11468.7 503.030  22
   0  11   6 2163.04 177.387  16
   0  11   6 2077.44 203.764  22
   0  11   7 3293.35 219.950  14
   0  12   0 1851.46 204.010  19
   0  12   1 7762.04 405.789  19
   0  12  -1 6028.34 633.235   9
   0  12   1 7394.14 723.985   5
   0  12   2 3502.56 280.546  19
   0  12   2 3558.27 269.295  22
   0  12   3 10373.7 476.830  22
   0  12   4 9065.83 438.131  22
   0  12   5 4187.34 283.008  22
   0  12   5 3845.47 251.242  16
   0  12   6 3110.83 189.671  16
   0  13   0 34.5943 105.692  19
   0  13   1 2844.77 225.630  22
   0  13  -1 3143.49 260.360  19
   0  13   1 3111.53 257.316  19
   0  13   2 25332.2 824.329  19
   0  13   2 24998.5 796.571  22
   0  13   3 378.403 133.113  22
   0  13   4 16143.1 585.536  22
   0  13   5 11427.3 419.604  16
   0  13   5 12035.6 458.700  22
   0  13   6 771.286 113.582  14
   0  14   0 22727.3 743.183  19
   0  14  -1 274.268 115.114  19
   0  14   1 324.108 111.151  22
   0  14   1 190.413 114.629  19
   0  14  -2 11401.1 482.698  19
   0  14   2 10505.0 439.518  22
   0  14   3 10300.0 429.011  22
   0  14  -3 10623.3 453.873  19
   0  14   4 2660.43 203.971  22
   0  14   5 9984.85 336.972  16
   0  14   5 10697.8 378.991  22
   0  15   0 47.7619 98.6732  19
   0  15   1 5201.45 255.612  22
   0  15  -1 5859.67 298.164  19
   0  15   1 5708.49 298.348  19
   0  15  -2 7333.41 331.302  19
   0  15   2 6436.53 298.030  22
   0  15   3 1273.98 132.030  22
   0  15  -3 1373.23 142.768  19
   0  16   0 8910.79 336.480  19
   0  16  -1 141.407 71.0930  19
   1 -16  -1 486.381 72.6605  27
   1 -16   0 440.312 73.4632  27
   1 -16   1 2272.81 134.740  27
   1 -15  -3 793.886 96.2563  27
  -1 -15   3 649.184 84.0786  15
   1 -15  -2 2555.38 165.564  27
   1 -15  -1 12272.1 414.190  27
   1 -15   0 4550.04 236.841  27
   1 -15   1 246.268 81.4402  15
   1 -15   2 966.361 117.184  15
   1 -15   3 14398.8 445.519  15
   1 -14  -5 48.9400 64.2298  28
   1 -14  -5 49.4921 49.0787  27
  -1 -14   5-47.2478 62.6350  15
   1 -14  -4 1889.51 142.081  27
  -1 -14   4 1508.42 140.532  15
   1 -14  -3 3192.99 196.842  27
  -1 -14   3 2539.97 189.254  15
   1 -14  -2 6496.22 296.539  27
  -1 -14   2 5608.01 279.684  15
   1 -14  -1 1827.55 167.017  27
   1 -14   0 561.948 109.981  15
   1 -14   1 4208.81 249.081  15
   1 -14   2 7543.82 346.918  15
   1 -14   3 2188.80 178.063  15
   1 -14   4 8343.45 331.329  15
   1 -14   4 7512.82 286.362  20
   1 -13  -6 645.665 78.1128  27
   1 -13  -6 703.529 89.4637  28
   1 -13  -5 2258.16 162.263  27
   1 -13  -4 3451.49 215.296  27
   1 -13  -3 544.442 115.649  27
  -1 -13   2 88.2403 93.3530  15
   1 -13  -2 57.0956 91.4719  27
   1 -13  -1 2489.43 197.982  15
   1 -13   0 22948.0 721.227  15
  -1 -13  -1 113.892 68.4993  27
   1 -13   1 124.668 83.7050  15
   1 -13   2 9700.19 433.899  15
   1 -13   3 12071.1 486.545  15
   1 -13   3 11584.0 437.931  20
   1 -13   4 4485.16 244.947  20
   1 -13   4 4421.41 268.840  15
  -1 -13  -5 4768.48 205.807  28
   1 -13   5 4676.49 249.395  15
   1 -13   5 4557.36 231.631  20
  -1 -12   7 2166.94 136.207  20
   1 -12  -7 2263.94 129.718  28
   1 -12  -6 6589.74 274.508  28
   1 -12  -6 6092.66 263.889  27
  -1 -12   5 3251.79 212.693  20
   1 -12  -5 3626.67 220.466  27
   1 -12  -4 2682.76 203.383  27
   1 -12  -3 4721.72 274.006  27
   1 -12  -2 14612.8 532.910  27
  -1 -12   1 10770.3 818.935   6
   1 -12  -1 10551.5 438.007  15
   1 -12  -1 12121.4 902.613   6
  -1 -12   0 15141.3 968.031   6
   1 -12   0 13316.5 967.553   6
   1 -12   0 13351.5 517.739  15
  -1 -12  -1 2209.97 359.106   6
   1 -12   1 2120.23 196.883  15
   1 -12   1 2420.11 436.260   6
   1 -12   2 8950.69 429.719  15
   1 -12   3 1183.00 154.786  20
   1 -12   4 19169.0 637.044  20
   1 -12   5 8695.32 375.881  20
   1 -12   6 6871.32 300.830  20
   1 -11  -7 8603.00 303.105  28
  -1 -11   7 7628.75 327.122  20
   1 -11  -7 7634.48 294.598  27
   1 -11  -6 7814.89 333.843  27
  -1 -11   6 7064.70 345.642  20
   1 -11  -6 8150.48 333.861  28
   1 -11  -5 5546.38 293.139  27
  -1 -11   5 4999.46 297.191  20
   1 -11  -4 12667.8 483.056  27
   1 -11  -3 311.843 168.149   6
   1 -11  -3 418.287 100.882  27
   1 -11  -2 32586.3 1518.83   6
   1 -11  -2 28757.6 845.360  15
  -1 -11   2 31811.0 1511.82   6
  -1 -11   1 16755.2 1026.17   6
   1 -11  -1 17774.0 1080.14   6
   1 -11  -1 15029.1 544.100  15
   1 -11   0 13121.8 509.675  15
  -1 -11   0 14514.6 925.676   6
   1 -11   0 14401.0 991.611   6
  -1 -11  -1 29027.7 1348.88   6
   1 -11   1 28938.2 1477.05   6
  -1 -11  -2 6210.19 617.393   6
   1 -11   2 5890.61 314.673  20
   1 -11   2 6166.73 687.951   6
   1 -11   3 21747.9 721.366  20
  -1 -11  -3 22937.3 1227.20   6
   1 -11   4 481.710 124.985  20
   1 -11   5 2263.38 213.346  20
   1 -11   6 4842.63 276.981  20
   1 -11   7 5074.60 241.669  20
  -1 -10   8 1206.22 125.632  20
  -1 -10   7 12239.0 474.915  20
   1 -10  -7 13041.6 429.388  28
   1 -10  -7 12326.0 434.472  27
   1 -10  -6 2372.83 191.226  28
  -1 -10   6 2239.29 213.230  20
   1 -10  -6 2579.38 201.172  27
   1 -10  -5 8742.54 387.399  27
   1 -10  -4 11134.0 434.662  27
  -1 -10   4 9203.56 433.703  20
   1 -10  -4 10755.0 840.124   6
   1 -10  -3 1736.33 166.489  27
   1 -10  -3 1937.48 376.789   6
   1 -10  -2 3687.95 480.137   6
  -1 -10   2 3394.14 468.487   6
   1 -10  -1 28784.7 1386.98   6
  -1 -10   1 28197.3 1346.63   6
   1 -10   0 11262.4 838.254   6
  -1 -10   0 11109.3 776.333   6
   1 -10   1 3024.92 451.884   6
  -1 -10  -1 3326.60 410.408   6
  -1 -10  -2 3531.14 453.478   6
   1 -10   3 4685.39 298.133  20
  -1 -10  -3 4993.20 544.990   6
  -1 -10  -4 22513.9 1215.76   6
   1 -10   4 21389.7 733.888  20
   1 -10   5 29948.8 922.793  20
   1 -10   6 686.961 137.918  20
   1 -10   7 12703.2 461.677  20
  -1  -9   8 20998.2 630.364  20
   1  -9  -8 20169.0 579.563  27
   1  -9  -7 13441.0 483.952  27
   1  -9  -7 14432.3 476.841  28
   1  -9  -6 25643.3 761.352  27
   1  -9  -6 25220.4 744.104  28
   1  -9  -5 2632.02 206.368  27
   1  -9  -5 2590.12 422.506   6
   1  -9  -4 8746.05 734.483   6
   1  -9  -4 8680.05 372.587  27
   1  -9  -3 8658.02 702.501   6
   1  -9  -2 9139.08 706.564   6
  -1  -9   1 10983.9 755.832   6
   1  -9  -1 10884.5 768.048   6
   1  -9   0 11748.0 815.093   6
  -1  -9   0 11803.1 767.411   6
   1  -9   1 996.807 268.897   6
  -1  -9  -1 868.371 218.270   6
  -1  -9  -2 7720.54 630.907   6
  -1  -9  -3 11207.9 783.803   6
  -1  -9  -4 7935.56 685.281   6
   1  -9   4 6995.24 378.282  20
   1  -9   4 6990.71 359.683  29
  -1  -9  -5 4515.17 530.755   6
   1  -9   5 4971.50 301.225  29
   1  -9   5 4958.31 324.555  20
   1  -9   6 7609.52 373.970  29
   1  -9   6 7987.03 405.127  20
   1  -9   7 3946.50 264.207  20
   1  -9   7 3356.42 226.695  29
   1  -9   8 7211.77 301.099  20
  -1  -8   9 3304.95 192.060  20
   1  -8  -8 828.451 109.395  28
   1  -8  -8 740.671 112.251  27
   1  -8  -7 7570.89 335.858  28
   1  -8  -7 7285.19 343.722  27
   1  -8  -6 5957.11 619.846   6
   1  -8  -6 5762.25 303.219  28
   1  -8  -6 6331.88 320.607  27
   1  -8  -5 4187.69 251.760  27
   1  -8  -5 4635.88 539.389   6
   1  -8  -4 10919.6 783.693   6
   1  -8  -3 13293.9 838.504   6
   1  -8  -2 7819.33 610.205   6
  -1  -8   1 11060.8 716.158   6
   1  -8  -1 11322.4 748.127   6
   1  -8   0 61987.2 2082.92   6
  -1  -8   0 65944.1 2025.01   6
  -1  -8  -1 43225.1 1525.58   6
  -1  -8  -2 6260.02 525.897   6
  -1  -8  -3 4849.38 498.163   6
  -1  -8  -4 21952.9 1149.77   6
  -1  -8  -5 16418.6 1012.52   6
   1  -8   5 15410.9 586.519  29
   1  -8   6 2916.55 235.214  29
   1  -8   7 4787.20 307.703  20
   1  -8   7 4451.66 277.990  29
   1  -8   8 4921.55 264.591  20
   1  -8   8 4460.88 244.500  29
   1  -7  -9 8490.27 314.534  27
   1  -7  -8 2011.25 179.537  27
   1  -7  -8 1916.87 162.357  28
   1  -7  -7 21504.0 685.828  27
   1  -7  -7 21889.0 660.892  28
   1  -7  -6 14564.9 961.183   6
   1  -7  -6 14022.3 497.366  28
   1  -7  -6 14281.4 518.077  27
   1  -7  -5 21800.1 1154.63   6
   1  -7  -4 33458.3 1403.38   6
   1  -7  -3 19216.6 970.132   6
   1  -7  -2 30009.1 1205.65   6
   1  -7  -1 52182.8 1716.74   6
  -1  -7   0 9575.23 584.701   6
   1  -7   0 8485.79 598.944   6
  -1  -7  -1 52808.1 1650.01   6
  -1  -7  -2 11124.9 667.292   6
  -1  -7  -3 9608.28 662.284   6
  -1  -7  -4 15034.7 892.605   6
   1  -7   5 5899.68 331.919  29
  -1  -7  -5 5911.29 583.745   6
   1  -7   6 13133.8 535.709  29
  -1  -7  -6 13789.5 946.947   6
   1  -7   7 5700.11 330.233  29
   1  -7   8 1669.24 166.734  29
   1  -7   8 1658.80 173.997  20
   1  -7   9 304.513 72.3917  20
   1  -7   9 318.143 72.4838  29
   1  -6  -9 373.892 87.0403  27
   1  -6  -8 19806.1 636.969  27
   1  -6  -7 23776.9 726.069  27
   1  -6  -7 22836.1 690.924  28
   1  -6  -6 6087.22 296.477  28
   1  -6  -6 5867.46 313.022  27
   1  -6  -5 27221.0 1256.01   6
   1  -6  -4 6333.19 539.579   6
   1  -6  -3 51548.0 1675.53   6
   1  -6  -2 23068.8 957.373   6
   1  -6  -1 118006. 2932.01   6
   1  -6  -1 118488. 3798.66   3
   1  -6   0 9125.95 864.696   3
   1  -6   0 9199.37 489.736   8
  -1  -6   0 10123.0 554.097   6
  -1  -6  -1 66007.9 1813.01   6
   1  -6   1 62498.6 1784.32   8
   1  -6   1 64243.4 2605.44   3
   1  -6   2 76735.4 2189.13   8
  -1  -6  -2 83208.9 2205.99   6
   1  -6   3 26212.0 1151.60   8
  -1  -6  -3 29066.7 1152.05   6
   1  -6   4 9030.47 711.673   8
  -1  -6  -4 10967.3 709.342   6
  -1  -6  -5 2210.67 358.790   6
   1  -6   6 6831.72 373.624  29
   1  -6   6 6789.15 706.770   8
  -1  -6  -6 6776.46 643.114   6
   1  -6   7 9108.80 435.856  29
   1  -6   8 791.355 132.304  20
   1  -6   8 637.444 126.468  29
   1  -6   9 3681.16 200.514  20
   1  -6   9 3839.96 214.937  29
  -1  -5   9 4618.31 249.910  29
  -1  -5   8 30561.1 914.794  29
   1  -5  -8 33627.2 926.073  27
   1  -5  -7 3909.83 238.327  28
   1  -5  -7 4307.38 262.249  27
   1  -5  -7 3685.86 496.112   6
   1  -5  -6 11055.2 797.397   6
   1  -5  -5 2616.86 359.799   6
   1  -5  -4 31898.1 1232.93   6
   1  -5  -3 6387.51 429.698   7
   1  -5  -3 6666.13 471.752   6
   1  -5  -2 457.071 144.693   6
   1  -5  -1 76767.0 2663.20   3
   1  -5  -1 70172.4 2853.44   1
   1  -5  -1 77206.0 2025.62   6
  -1  -5   1 78271.5 3104.83   3
  -1  -5   0 49936.0 2421.68   2
   1  -5   0 52773.5 2010.00   3
  -1  -5   0 50307.5 1430.07   6
  -1  -5   0 55566.5 2413.14   3
   1  -5   0 48145.7 1377.87   8
  -1  -5  -1 38082.2 1158.71   6
   1  -5   1 37986.8 1747.11   3
   1  -5   1 36478.6 1175.12   8
   1  -5   2 1925.15 429.749   3
  -1  -5  -2 2287.66 258.942   6
   1  -5   2 2129.58 266.103   8
  -1  -5  -3 14.4924 104.120   6
  -1  -5  -4 8902.43 611.224   6
  -1  -5  -5 4817.52 487.228   6
   1  -5   6 13865.4 551.676  29
  -1  -5  -6 13626.2 920.341   6
   1  -5   7 1243.53 171.685  29
   1  -5   8 2803.17 235.105  29
   1  -5   9 676.109 111.242  29
   1  -5   9 792.152 107.159  20
  -1  -4  10 614.190 84.4032  29
  -1  -4   9 866.027 128.175  29
   1  -4  -8 5479.61 288.964  23
   1  -4  -8 5105.13 301.953  27
  -1  -4   8 5280.48 314.551  29
  -1  -4   7 10812.6 471.694  29
   1  -4  -7 11398.7 459.885  27
   1  -4  -7 11643.5 428.513  28
   1  -4  -7 11902.6 868.945   6
   1  -4  -6 6306.21 585.199   6
   1  -4  -5 292.913 157.004   6
   1  -4  -4 10976.5 631.937   6
   1  -4  -3 19504.2 793.360   6
   1  -4  -3 17314.6 722.764   7
   1  -4  -2 37943.5 1157.41   6
   1  -4  -1 1528.82 190.029   6
  -1  -4   1 1330.61 340.540   3
   1  -4  -1 1193.96 358.347   1
   1  -4  -1 1490.79 289.928   3
   1  -4   0 374788. 8203.27   3
   1  -4   0 360784. 7563.30   8
  -1  -4   0 365320. 8890.02   2
  -1  -4   0 365888. 7561.68   6
  -1  -4   0 385156. 8857.35   3
   1  -4   1 59457.0 2134.85   3
  -1  -4  -1 67786.2 2580.84   3
  -1  -4  -1 61577.7 1568.92   6
   1  -4   1 60144.1 1626.20   8
  -1  -4  -1 61075.8 2709.61   2
  -1  -4  -2 30400.3 980.391   6
  -1  -4  -3 55979.2 1630.27   6
  -1  -4  -4 3751.49 370.795   6
  -1  -4  -5 33567.8 1358.19   6
  -1  -4  -6 6788.75 639.657   6
   1  -4   6 6446.84 355.916  29
   1  -4   7 270.648 114.895  29
  -1  -4  -7 192.377 145.016   6
   1  -4   8 13267.0 544.300  29
   1  -4   9 7340.92 345.392  29
  -1  -3  10 2182.40 153.692  29
  -1  -3   9 868.774 135.367  29
   1  -3  -8 1508.20 158.265  23
   1  -3  -8 1311.28 162.723  27
  -1  -3   8 1313.81 171.819  29
   1  -3  -7 3237.21 226.852  27
   1  -3  -7 3270.77 208.145  28
  -1  -3   7 2883.46 237.064  29
   1  -3  -6 18852.9 1005.74   6
   1  -3  -5 28634.5 1146.75   6
   1  -3  -4 15593.5 738.293   6
   1  -3  -3 734.725 153.512   6
   1  -3  -3 406.651 252.241   2
   1  -3  -3 539.090 131.703   7
   1  -3  -2 2660.65 227.553   6
   1  -3  -1 29676.6 1521.28   1
   1  -3   0 969463. 19595.2   3
  -1  -3   0 963528. 20274.1   2
  -1  -3  -1 282838. 5760.24   6
   1  -3   1 273864. 5878.17   8
  -1  -3  -2 10202.8 1027.78   4
  -1  -3  -2 9670.24 454.207   6
  -1  -3  -3 35365.1 1130.89   6
  -1  -3  -4 10350.4 598.690   6
  -1  -3  -5 21052.2 1009.56   6
  -1  -3  -6 2843.02 424.661   6
   1  -3   7 19055.5 694.812  29
  -1  -3  -7 18838.3 1133.81   6
   1  -3   8 5603.98 347.263  29
   1  -3   9 6223.58 328.642  29
  -1  -2  10 1988.77 157.765  29
  -1  -2   9 1122.99 159.243  29
   1  -2  -8 614.891 131.580  27
  -1  -2   8 805.872 144.391  29
   1  -2  -8 815.424 125.412  23
   1  -2  -7 293.320 189.174   6
   1  -2  -7 212.718 89.3840  27
  -1  -2   7 108.745 89.6608  29
   1  -2  -6 11120.7 749.925   6
  -1  -2   5 27129.7 1142.31   5
   1  -2  -5 32550.5 1193.09   6
  -1  -2   4 93972.4 2461.03   5
   1  -2  -4 94401.4 2390.69   7
  -1  -2   3 12031.7 521.346   5
   1  -2  -3 13080.8 553.887   6
   1  -2  -3 12231.8 528.217   7
   1  -2  -3 12482.8 982.410   2
   1  -2  -2 34722.8 961.654   6
   1  -2  -2 35726.4 983.047   7
   1  -2  -2 34441.6 1564.55   2
  -1  -2   1 21574.3 866.084   2
   1  -2  -1 19040.6 1142.39   1
  -1  -2   0 13024.1 776.894   4
   1  -2   0 11583.5 484.318   3
  -1  -2  -1 820472. 17432.8   4
  -1  -2  -2 114101. 2572.53   6
   1  -2   2 114694. 2701.74   5
  -1  -2  -2 113293. 3761.40   4
  -1  -2  -3 40682.1 1224.38   6
   1  -2   3 43559.2 1366.95   5
   1  -2   4 4360.36 425.932   5
  -1  -2  -4 4500.65 374.324   6
   1  -2   5 22855.7 1155.38   5
  -1  -2  -5 24214.9 1079.74   6
   1  -2   6 7597.80 718.506   5
  -1  -2  -6 8742.00 682.805   6
   1  -2   7 734.939 160.703  14
  -1  -2  -7 769.256 265.109   6
   1  -2   7 1306.61 182.252  29
   1  -2   8 9198.28 456.104  29
   1  -2   9 1111.70 159.104  29
  -1  -1  10 1503.32 146.704  29
  -1  -1   9 2145.31 206.657  29
  -1  -1   8 380.565 126.924  29
   1  -1  -8 308.678 99.8036  23
   1  -1  -7 3960.93 488.235   6
   1  -1  -7 4102.26 242.435  23
   1  -1  -7 3954.21 260.113  27
  -1  -1   7 4379.40 287.446  29
   1  -1  -6 8058.08 621.496   6
  -1  -1   6 7373.15 605.394   5
   1  -1  -5 7179.81 513.495   6
  -1  -1   5 6887.77 510.103   5
   1  -1  -4 127337. 3126.92   7
  -1  -1   4 136572. 3210.60   5
   1  -1  -3 55701.8 1380.46   6
   1  -1  -3 54712.7 1963.87   2
  -1  -1   3 51650.3 1361.10   5
   1  -1  -2 25108.5 1110.31   2
   1  -1  -2 25957.7 729.047   6
   1  -1  -1 47291.5 1759.26   1
  -1  -1   0 89583.6 2363.75   4
  -1  -1  -1 54728.6 1942.28   4
  -1  -1  -2 479678. 9691.03   6
  -1  -1  -2 485624. 11038.2   4
   1  -1   3 14508.4 677.744   5
  -1  -1  -3 12936.8 1155.26   4
  -1  -1  -3 14716.9 605.206   6
   1  -1   4 60642.2 1881.51   5
  -1  -1  -4 63018.0 1778.32   6
   1  -1   5 12611.4 810.486   5
  -1  -1  -5 11553.7 721.624   6
  -1  -1  -6 181.299 153.986   6
   1  -1   6 124.532 199.916   5
   1  -1   7 3571.78 301.278  14
   1  -1   7 3512.04 523.897   5
   1  -1   7 3746.82 287.457  29
   1  -1   8 9714.50 465.931  29
   1  -1   8 8349.27 480.742  14
   1  -1   9 176.708 110.115  29
   1  -1  10 226.932 78.9825  29
  -1   0  10 742.458 119.515  29
  -1   0   9 2443.02 224.448  29
   1   0  -8 121.654 74.6151  23
   1   0  -8 120.702 90.4944  21
  -1   0   8 360.034 128.821  29
  -1   0   7-30.4358 83.7070  29
   1   0  -7 84.7428 81.0781  21
   1   0  -7-18.1855 77.7040  27
   1   0  -7-116.919 92.0191  23
   1   0  -6 5255.00 497.370   6
  -1   0   6 5460.92 516.948   5
  -1   0   5 1346.18 236.261   5
   1   0  -5 1293.53 233.309   6
   1   0  -4 92401.8 2359.89   7
   1   0  -4 98377.5 2386.73   6
  -1   0   4 96648.3 2423.15   5
   1   0  -3 38591.8 1062.97   6
   1   0  -3 34623.6 1313.98   2
  -1   0   3 37691.2 1088.08   5
   1   0  -3 38247.6 1099.98   7
   1   0  -2 22104.5 781.953   2
  -1   0   2 22285.9 768.065   4
   1   0  -1 47011.1 1546.07   1
   1   0   0 196311. 4106.71   3
  -1   0   0 195946. 4085.61   3
  -1   0  -2 1636.48 162.912   6
  -1   0  -3 92493.2 3416.75   4
   1   0   3 98563.6 2440.54   5
  -1   0  -3 97056.2 2340.20   6
   1   0   4 9092.38 590.659   5
  -1   0  -4 9445.34 540.986   6
  -1   0  -5 3329.47 376.367   6
   1   0   5 3122.40 414.336   5
   1   0   6 6826.10 666.901   5
   1   0   7 292.745 128.838  14
   1   0   7 222.317 199.167   5
   1   0   7 230.124 103.633  29
   1   0   8 285.215 123.989  29
   1   0   8-0.46455 110.757  14
   1   0   9-9.47698 102.709  29
   1   0  10 686.043 101.884  29
  -1   1  10 1723.06 159.106  29
  -1   1   9 2192.65 222.979  29
   1   1  -8 389.913 121.656  21
   1   1  -8 338.455 96.3560  23
  -1   1   8 431.839 129.316  29
  -1   1   7 3884.33 281.225  29
  -1   1   7 3943.38 489.145   5
   1   1  -7 4105.09 280.047  21
   1   1  -7 3725.32 235.834  23
  -1   1   6 8070.67 642.087   5
   1   1  -5 7190.30 507.022   7
  -1   1   5 7605.68 553.523   5
   1   1  -5 7332.56 525.402   6
  -1   1   4 142614. 3390.89   5
   1   1  -4 145009. 3323.65   6
   1   1  -4 141462. 3360.32   7
  -1   1   3 57638.2 1989.86   4
   1   1  -3 53511.4 1399.59   6
   1   1  -3 54473.7 1465.82   7
  -1   1   3 52690.7 1451.82   5
  -1   1   2 25606.8 1102.52   4
  -1   1   1 48642.4 1613.84   2
   1   1  -1 52920.7 1512.85   1
   1   1   0 87716.2 2269.96   3
   1   1   1 52418.6 1678.49   3
   1   1   2 482924. 10748.8   3
  -1   1  -2 489073. 9856.96   6
  -1   1  -3 14348.2 610.598   6
   1   1   3 13247.9 1051.15   3
   1   1   3 14977.9 686.408   5
  -1   1  -3 14164.4 529.658  11
  -1   1  -4 60653.1 1779.60   6
   1   1   4 61982.9 1889.94   5
   1   1   5 12659.6 810.994   5
   1   1   6 101.051 173.962   5
   1   1   7 3440.98 528.493   5
   1   1   7 4001.87 292.400  29
   1   1   7 4369.72 322.367  14
   1   1   8 9345.20 495.891  14
   1   1   8 9264.68 459.989  29
   1   1   9 260.553 124.409  29
   1   1   9 119.328 108.084  14
   1   1  10 150.134 65.7902  18
   1   1  10 235.351 78.1941  29
  -1   2  10 2123.37 174.905  29
  -1   2   9 1158.50 176.537  29
   1   2  -8 801.986 153.397  21
  -1   2   8 886.257 169.386  29
   1   2  -7 149.446 78.1986  23
  -1   2   7 287.701 255.867   5
  -1   2   7 38.0938 97.1876  29
   1   2  -7 12.6974 81.4473  21
  -1   2   6 11360.0 788.221   5
   1   2  -5 32389.3 1253.41   7
  -1   2   5 32756.4 1292.66   5
   1   2  -4 106178. 2711.66   7
  -1   2   4 107055. 2717.09   5
  -1   2   3 12587.8 965.469   4
  -1   2   3 12412.1 557.099   5
   1   2  -3 11747.8 551.355   7
  -1   2   2 31548.1 943.001   5
   1   2  -1 23601.0 897.663   4
  -1   2   1 22066.0 1167.42   2
  -1   2   1 22677.0 910.099   3
  -1   2   0 11961.4 750.023   1
   1   2   0 13123.0 781.275   4
   1   2   0 13356.6 782.402   3
   1   2   1 816463. 17049.2   3
  -1   2  -2 115183. 2545.24  11
   1   2   2 114288. 2675.05   5
   1   2   2 113448. 3482.20   3
   1   2   3 44146.6 1352.79   5
  -1   2  -3 40783.2 1145.40  11
   1   2   4 4228.97 424.280   5
   1   2   5 25697.3 1224.07   5
   1   2   6 8391.83 742.078   5
   1   2   7 1137.30 172.820  29
   1   2   7 1027.50 340.181   5
   1   2   7 1202.70 174.829  14
   1   2   8 9236.09 453.933  29
   1   2   8 9596.26 496.375  14
   1   2   9 1218.24 179.821  14
   1   2   9 1409.84 175.878  29
  -1   3  10 2158.37 171.747  29
  -1   3   9 890.535 155.642  29
  -1   3   8 1345.70 187.464  29
   1   3  -8 1082.95 167.282  21
  -1   3   7 2871.88 467.326   5
  -1   3   7 3194.45 262.294  29
   1   3  -7 3182.12 217.923  23
   1   3  -7 3064.07 251.919  21
  -1   3   6 18090.0 1048.32   5
  -1   3   5 26865.9 1183.53   5
  -1   3   4 15782.5 793.778   5
   1   3  -4 16287.9 804.321   7
   1   3  -3 666.563 169.304   7
  -1   3   3 746.902 171.602   5
   1   3  -2 2523.33 258.564   7
  -1   3   2 2545.03 259.303   5
  -1   3   2 1955.75 362.884   3
   1   3  -1 34109.7 1427.41   4
  -1   3   1 32218.3 1298.61   3
  -1   3   1 33752.1 926.638  11
   1   3   0 970600. 19451.7   9
   1   3   0 996743. 20500.2   3
   1   3   0 999999. 20551.7   4
  -1   3   0 982560. 20229.6   1
   1   3   1 283117. 5919.19   5
   1   3   1 286977. 6905.47   3
   1   3   2 9655.15 510.382   5
   1   3   2 9423.25 872.249   3
   1   3   2 9278.44 1037.53   4
  -1   3  -2 10423.5 459.219  11
  -1   3  -3 36353.5 1087.97  11
   1   3   3 35760.7 1237.28   5
   1   3   4 11831.3 724.759   5
   1   3   5 22620.3 1165.26   5
   1   3   6 2995.01 469.356   5
   1   3   7 19905.0 725.944  14
   1   3   7 19166.2 709.709  29
   1   3   7 19206.2 1242.68   5
   1   3   8 5992.09 382.060  14
   1   3   8 5409.17 341.213  29
   1   3   9 6106.21 356.002  14
   1   3   9 6053.91 324.181  29
  -1   4  10 767.423 109.302  29
  -1   4   9 1195.25 167.747  29
  -1   4   8 5246.84 341.220  29
   1   4  -7 11101.5 504.130  21
  -1   4   7 11485.8 520.085  29
  -1   4   7 11337.1 489.421  14
  -1   4   7 11753.9 917.712   5
  -1   4   6 6548.26 644.581   5
  -1   4   5 232.410 175.316   5
   1   4  -5 243.963 156.277   9
  -1   4   4 10581.4 679.502   5
  -1   4   3 19426.0 871.722   5
   1   4  -2 34334.7 1013.75  11
  -1   4   2 33891.9 1034.08  11
  -1   4   2 32522.4 1635.08   3
   1   4  -1 1347.07 330.718   4
  -1   4   1 1258.01 176.328  11
   1   4  -1 1379.93 188.781  11
  -1   4   1 1816.82 436.902   2
  -1   4   1 1247.21 278.995   3
  -1   4   0 371759. 7668.25  11
   1   4   0 366678. 7693.65   9
   1   4   0 373434. 9065.28   4
   1   4   0 379145. 8956.51   3
  -1   4   0 387975. 9229.63   2
   1   4   1 63467.1 2521.12   3
  -1   4  -1 64694.5 2195.17   1
   1   4   1 60531.8 1654.85   5
  -1   4  -1 64544.4 1642.46  11
   1   4   1 64236.6 2790.44   4
   1   4   2 29591.0 1047.74   5
  -1   4  -2 29748.3 974.615  11
   1   4   3 56613.4 1731.43   5
  -1   4  -3 53622.3 1543.26  11
   1   4   4 3634.29 418.258   5
   1   4   5 36032.3 1562.30   5
   1   4   6 6798.80 711.134   5
   1   4   6 6947.49 368.116  14
   1   4   7 378.568 127.399  14
   1   4   7 429.285 226.384   5
   1   4   7 321.739 116.338  29
   1   4   8 13530.9 575.530  14
   1   4   8 12584.8 532.394  29
   1   4   9 6508.20 323.344  29
   1   4   9 7051.59 375.921  14
  -1   5   9 5130.21 303.587  29
  -1   5   8 34009.5 1001.99  14
  -1   5   8 35035.9 1039.98  29
  -1   5   7 4161.71 303.008  29
  -1   5   7 4189.74 288.041  14
  -1   5   7 4131.55 566.233   5
  -1   5   6 10104.3 825.071   5
   1   5  -5 2529.41 363.642   9
  -1   5   5 2328.78 389.336   5
  -1   5   4 32474.4 1339.70   5
  -1   5   3 7101.30 536.461   5
   1   5  -2 675.644 155.640  11
  -1   5   2 511.527 154.209  11
  -1   5   1 73300.8 1932.68  11
  -1   5   1 68554.9 2629.77   3
   1   5  -1 76013.6 2013.46   9
   1   5  -1 75308.5 2966.92   4
   1   5   0 48862.5 1433.65   9
  -1   5   0 49937.4 1433.29  11
   1   5   0 51016.9 2465.74   4
  -1   5   0 49571.1 2505.02   2
   1   5   1 37534.3 1215.06   5
  -1   5  -1 36435.9 2130.50   2
  -1   5  -1 39920.2 1209.48  11
  -1   5  -1 38535.9 1627.19   1
   1   5   2 2310.03 285.784   5
  -1   5  -2 2023.18 247.206  11
   1   5   3 60.1027 152.715   5
  -1   5  -3-69.2442 123.283  11
   1   5   4 8829.04 684.786   5
   1   5   5 5183.38 589.895   5
   1   5   6 14540.7 576.555  14
   1   5   6 14344.5 561.632  29
   1   5   6 14772.3 1067.33   5
   1   5   7 929.450 158.481  29
   1   5   7 1251.76 180.670  14
   1   5   8 2605.40 245.698  14
   1   5   8 2525.15 223.359  29
   1   5   9 657.522 109.701  29
   1   5   9 641.867 132.241  14
  -1   6   9 526.279 117.647  29
  -1   6   8 19909.0 703.522  29
  -1   6   8 19445.8 675.635  14
  -1   6   7 24019.2 788.037  14
  -1   6   7 24060.9 814.880  29
  -1   6   6 5883.94 349.552  29
  -1   6   6 6276.22 672.520   5
  -1   6   5 27112.4 1359.34   5
   1   6  -5 27752.1 1328.51   9
   1   6  -4 6496.75 592.138   9
  -1   6   4 6273.58 583.822   5
  -1   6   3 51505.5 1779.06   5
   1   6  -2 23561.2 916.195  11
  -1   6   2 21200.6 928.209  11
  -1   6   1 115764. 2894.32  11
   1   6  -1 116422. 2959.27   9
   1   6   0 9794.77 561.557   9
  -1   6   0 10040.3 569.039  11
   1   6   1 61667.3 1760.90   9
   1   6   1 65322.9 1861.77   5
  -1   6  -1 67547.5 1871.88  11
   1   6   2 81574.4 2334.24   5
  -1   6  -2 83098.5 2247.23  11
   1   6   3 28555.0 1246.50   5
  -1   6  -3 29264.4 1131.65  11
   1   6   4 11237.4 802.709   5
   1   6   5 2473.22 416.877   5
   1   6   6 6648.22 349.208  16
   1   6   6 7535.37 400.845  14
   1   6   6 7655.98 772.944   5
   1   6   7 8315.05 418.385  29
   1   6   7 9386.81 467.578  14
   1   6   8 972.099 170.642  14
   1   6   8 688.577 123.858  29
   1   6   9 3278.15 193.206  29
   1   6   9 3928.44 250.764  14
  -1   7   9 9328.80 362.102  14
  -1   7   9 9132.84 366.337  29
  -1   7   8 2078.75 209.467  29
  -1   7   8 2132.67 199.242  14
  -1   7   7 20880.7 740.831  29
  -1   7   6 13520.1 1017.01   5
  -1   7   6 14190.1 570.668  29
  -1   7   5 20495.9 1216.67   5
   1   7  -5 22249.8 1220.85   9
   1   7  -4 35324.0 1541.12   9
  -1   7   4 34557.6 1541.60   5
  -1   7   3 19773.4 1073.91   5
   1   7  -3 21240.0 1100.26   9
   1   7  -2 31598.5 1324.10   9
  -1   7   1 50239.6 1635.95  11
   1   7  -1 49516.4 1667.15   9
   1   7   0 9548.12 606.367   9
  -1   7   0 9749.09 606.552  11
   1   7   1 48925.8 1552.85   9
   1   7   1 50715.9 1664.86   5
  -1   7  -1 53145.2 1675.97  11
  -1   7  -2 11184.3 684.861  11
   1   7   2 11268.8 727.693   5
  -1   7  -3 9943.27 654.816  11
   1   7   3 9221.57 707.123   5
   1   7   4 14238.8 956.332   5
   1   7   5 6340.58 339.613  16
   1   7   5 6118.85 344.987  22
   1   7   5 6093.27 685.419   5
   1   7   6 13479.1 526.894  16
   1   7   6 13034.9 1038.05   5
   1   7   7 6503.63 377.786  14
   1   7   8 1956.25 212.657  14
   1   7   9 436.034 101.334  14
  -1   8   9 3364.91 189.533  14
  -1   8   9 2908.91 179.229  29
  -1   8   8 621.925 126.612  14
  -1   8   8 679.817 134.800  29
  -1   8   7 7076.16 382.527  29
  -1   8   6 5319.43 645.769   5
   1   8  -6 5422.12 626.918   9
  -1   8   6 5936.49 351.856  29
  -1   8   6 6180.84 341.194  22
  -1   8   5 4099.46 279.123  22
  -1   8   5 3567.64 530.517   5
   1   8  -5 4117.01 546.762   9
  -1   8   5 3744.58 267.433  29
   1   8  -4 11446.1 872.828   9
  -1   8   4 10265.9 842.304   5
   1   8  -3 13383.4 917.702   9
  -1   8   3 13561.7 928.086   5
   1   8  -2 7374.35 639.519   9
  -1   8   2 8128.88 673.251   5
   1   8  -1 9942.92 697.076   9
  -1   8   1 9755.28 690.525  11
   1   8   0 59886.9 1916.50   9
  -1   8   0 61902.0 1981.61  11
   1   8   1 41139.8 1538.71   5
  -1   8  -1 42513.9 1561.71  11
   1   8   2 6028.77 566.629   5
  -1   8  -2 6463.93 558.432  11
   1   8   3 5082.45 549.848   5
  -1   8  -3 4974.99 505.703  11
   1   8   4 21007.8 1225.22   5
   1   8   5 16252.3 600.762  16
   1   8   5 16575.4 1136.20   5
   1   8   5 15901.4 620.327  22
   1   8   6 2854.31 235.599  16
   1   8   7 4656.70 333.809  14
   1   8   8 5063.69 299.374  14
  -1   9   8 21247.2 638.064  14
  -1   9   8 19237.7 611.615  29
  -1   9   7 13069.9 518.835  29
  -1   9   6 24099.6 799.003  29
  -1   9   6 25280.5 804.108  22
   1   9  -5 2093.88 424.593   9
  -1   9   5 2426.03 225.011  22
  -1   9   5 2442.41 462.081   5
  -1   9   5 2404.19 217.500  29
   1   9  -4 9407.69 819.181   9
  -1   9   4 7921.05 390.543  29
  -1   9   4 9160.06 817.236   5
  -1   9   4 8795.42 416.149  22
   1   9  -3 8465.18 761.412   9
  -1   9   3 8687.33 768.540   5
  -1   9   2 8996.90 756.634   5
   1   9  -2 8495.50 725.384   9
   1   9  -1 9842.18 732.823   9
   1   9   0 10779.2 730.895   9
  -1   9   0 11355.0 777.889  11
   1   9   0 10641.9 713.864   5
   1   9   1 747.822 231.223   5
  -1   9  -1 1001.98 262.756  11
   1   9   2 7232.06 654.312   5
  -1   9  -2 7403.22 648.622  11
  -1   9  -3 10459.7 773.711  11
   1   9   3 10697.6 836.808   5
   1   9   4 7853.64 755.653   5
   1   9   4 7777.59 401.076  22
   1   9   5 4843.28 623.850   5
   1   9   5 4915.87 311.071  16
   1   9   5 5472.55 341.718  22
   1   9   6 8177.52 391.749  16
   1   9   7 4164.03 284.585  14
   1   9   8 7349.91 333.387  14
  -1  10   8 1089.49 109.877  29
  -1  10   8 1085.65 124.091  14
  -1  10   7 11628.7 458.119  29
  -1  10   7 13936.0 507.600  14
  -1  10   6 2482.26 226.083  22
  -1  10   6 2216.46 203.450  29
  -1  10   5 8093.18 402.740  29
  -1  10   5 9308.54 440.490  22
   1  10  -4 11922.9 961.109   9
  -1  10   4 12366.8 982.647   5
  -1  10   4 11529.3 505.432  22
   1  10  -3 1795.65 374.777   9
  -1  10   3 1710.26 387.335   5
  -1  10   3 1735.00 187.006  19
   1  10  -2 3638.57 504.998   9
  -1  10   2 4242.35 564.589   5
   1  10  -1 25917.3 1303.48   9
  -1  10   0 8745.73 685.757   9
  -1  10   0 10163.1 786.888  11
   1  10   0 9604.85 733.360   9
  -1  10  -1 3197.66 447.934  11
   1  10   1 3465.42 453.124   5
   1  10   2 3232.12 470.759   5
   1  10   2 3074.75 245.351  19
   1  10   2 3222.55 245.943  22
  -1  10  -2 3818.83 488.215  11
   1  10   3 4179.03 547.284   5
   1  10   3 4998.34 314.435  22
  -1  10  -3 4764.71 544.892  11
   1  10   4 21309.9 748.118  22
   1  10   4 21291.4 1287.08   5
   1  10   5 30787.6 924.750  16
   1  10   5 30245.6 946.166  22
   1  10   6 465.753 121.712  16
   1  10   7 13809.6 515.928  14
  -1  11   7 9133.56 374.335  14
  -1  11   6 7925.38 380.347  22
  -1  11   5 5785.36 347.017  22
  -1  11   4 13097.5 548.401  22
  -1  11   3 538.503 264.405   5
   1  11  -3 379.034 254.734   9
  -1  11   3 240.934 101.414  19
  -1  11   2 33381.2 1640.94   5
  -1  11   2 30061.2 924.995  19
   1  11  -2 29537.7 1514.09   9
  -1  11   1 15551.8 596.118  19
  -1  11   1 16237.3 1089.34   5
   1  11  -1 14431.8 990.763   9
  -1  11   1 15229.5 585.924  24
   1  11   0 14359.1 565.368  19
  -1  11   0 13565.3 532.909  24
  -1  11   0 13066.5 546.022  19
  -1  11  -1 25841.0 1358.13   9
   1  11   1 26007.3 811.071  22
   1  11   1 27969.1 862.589  19
  -1  11  -2 5701.56 618.232  11
  -1  11  -2 5500.91 643.904   9
   1  11   2 5486.53 599.467   5
   1  11   2 5948.74 351.240  19
   1  11   2 5670.85 335.697  22
  -1  11  -3 22539.1 1347.12   9
   1  11   3 20606.0 1258.26   5
   1  11   3 22278.5 756.755  22
   1  11   4 186.448 114.237  22
   1  11   5 2119.42 220.439  22
   1  11   5 2233.71 212.152  16
   1  11   6 5248.81 301.749  14
   1  11   6 4723.71 267.907  16
   1  11   7 4992.28 268.257  14
  -1  12   7 2450.84 166.234  14
  -1  12   6 6274.97 312.026  22
  -1  12   5 3694.65 265.034  22
  -1  12   4 2506.11 231.710  22
  -1  12   3 4518.50 306.998  22
  -1  12   2 14533.6 578.241  19
  -1  12   1 10706.7 487.126  19
   1  12  -1 10597.6 495.344  19
  -1  12   1 10097.4 872.458   5
   1  12   0 14027.4 569.841  19
  -1  12   0 13725.6 542.389  24
  -1  12   0 13250.4 561.547  19
   1  12   1 2118.86 219.019  19
   1  12   1 2118.72 199.678  22
   1  12   2 9612.12 465.202  19
   1  12   2 9475.71 439.482  22
   1  12   3 1125.72 171.556  22
   1  12   4 20006.5 702.917  22
   1  12   5 8743.92 387.918  16
   1  12   5 8602.07 410.223  22
   1  12   6 7449.59 333.410  14
   1  12   6 6621.53 292.221  16
  -1  13   6 639.004 102.390  22
  -1  13   5 1947.97 155.950  16
  -1  13   5 2277.80 196.583  22
  -1  13   4 3563.30 259.874  22
  -1  13   3 502.906 133.175  22
  -1  13   2 104.157 108.959  22
  -1  13   2 96.1526 102.404  19
   1  13  -2 37.3346 105.214  19
   1  13  -1 2416.95 231.356  19
  -1  13   1 2683.79 240.795  19
   1  13   0 23631.2 782.250  19
  -1  13   0 23031.9 779.329  19
  -1  13  -1 120.270 108.091  19
   1  13   1 142.332 97.7063  22
   1  13   1 179.731 121.624  19
   1  13   2 8974.03 411.581  22
   1  13   3 12329.3 503.495  22
   1  13   4 4498.67 284.061  22
   1  13   5 5379.98 269.919  16
   1  14  -5-35.5928 66.5033  19
  -1  14   5 110.350 80.5798  22
   1  14  -4 1456.71 156.446  19
  -1  14   4 1530.89 164.486  22
   1  14  -3 2874.32 226.436  19
  -1  14   3 3264.45 234.420  22
  -1  14   2 6160.09 325.165  22
   1  14  -2 6377.50 343.143  19
   1  14  -1 1721.90 187.446  19
  -1  14   1 1806.88 191.097  19
  -1  14   1 1352.78 163.656  22
  -1  14   0 375.077 118.713  19
   1  14   0 535.253 123.285  19
  -1  14  -1 4071.95 277.867  19
   1  14   1 4074.34 278.554  19
  -1  14  -2 7161.28 368.762  19
   1  14   2 6822.79 331.982  22
  -1  14  -3 1936.64 191.305  19
   1  14   3 1710.15 174.348  22
   1  14   4 7941.70 348.245  22
   1  14   4 8464.94 345.062  16
   1  15  -3 599.301 102.066  19
  -1  15   3 637.734 105.838  22
   1  15  -2 2387.29 183.272  19
  -1  15   2 2253.24 175.349  22
  -1  15   1 12502.6 458.122  19
   1  15  -1 13395.5 467.491  19
   1  15   0 5528.20 290.668  19
  -1  15   0 5574.83 289.282  19
  -1  15  -1 46.9498 90.9732  19
  -1  15  -2 764.243 118.361  19
   1  15   2 519.012 90.8317  22
  -1  15  -3 13563.8 451.569  19
   1  15   3 12713.9 429.204  22
   1  16  -1 452.091 84.3965  19
  -1  16   1 254.707 64.4788  22
  -1  16   0 478.345 89.1694  19
  -1  16  -1 3214.89 180.826  19
   2 -15  -3 452.044 78.2766  27
   2 -15  -2 3672.05 200.207  27
   2 -15  -1 5318.99 249.010  27
   2 -15   0 780.741 105.941  27
   2 -15   1 1027.55 118.580  15
   2 -15   2 2032.02 148.464  15
   2 -15   3 1802.23 129.959  15
   2 -14  -5 3944.84 181.339  28
   2 -14  -5 3568.45 177.558  27
   2 -14  -4 1533.93 136.971  27
  -2 -14   4 1168.81 114.806  15
   2 -14  -3 4840.89 252.887  27
   2 -14  -2 688.176 119.272  27
   2 -14  -1 13350.3 480.302  27
   2 -14   0 135.196 87.5563  15
   2 -14   1 6836.12 327.174  15
   2 -14   2 2943.71 209.519  15
   2 -14   3 7993.48 330.864  15
   2 -14   3 7119.75 295.028  20
   2 -14   4 2639.72 165.644  15
   2 -14   4 2326.30 148.113  20
   2 -13  -6 4394.91 196.254  28
   2 -13  -6 3717.36 186.812  27
   2 -13  -5 237.499 83.9213  27
   2 -13  -5 262.701 88.8090  28
   2 -13  -4 9198.72 376.540  27
   2 -13  -3 1300.07 155.802  27
   2 -13  -2 11258.1 444.459  27
   2 -13  -1 30837.0 888.682  15
   2 -13   0 16643.8 587.355  15
   2 -13   1 2104.74 200.692  15
   2 -13   2 5762.90 316.223  15
   2 -13   2 5375.97 284.376  20
   2 -13   3 11649.5 459.980  15
   2 -13   3 11160.5 429.382  20
   2 -13   4 1109.26 126.880  20
   2 -13   4 1282.51 145.535  15
   2 -13   5 1071.33 112.795  15
   2 -13   5 1236.15 121.028  20
   2 -12  -7 3655.25 177.785  27
   2 -12  -7 3978.43 178.524  28
   2 -12  -6 82.1543 71.6503  27
   2 -12  -6-10.9562 76.6518  28
   2 -12  -5 3751.86 233.244  27
   2 -12  -4 1106.97 147.909  27
   2 -12  -3 974.970 141.202  27
   2 -12  -2 7331.79 357.783  27
   2 -12  -1 31387.7 912.232  15
   2 -12   0 5359.26 309.750  15
   2 -12   1 208.630 84.7313  20
   2 -12   1 207.871 105.283  15
   2 -12   2 3524.66 243.645  20
   2 -12   2 3181.09 252.187  15
   2 -12   3 4377.78 276.326  20
   2 -12   3 4543.99 297.939  15
   2 -12   4 3314.43 243.552  15
   2 -12   4 3790.93 250.512  20
   2 -12   5 832.670 115.975  15
   2 -12   5 1158.31 138.631  20
   2 -12   6 4480.41 217.266  20
   2 -12   6 3911.64 196.159  15
  -2 -11   7 4140.14 226.046  20
   2 -11  -7 4965.13 227.971  28
   2 -11  -7 4595.60 229.956  27
   2 -11  -6 762.726 121.677  27
   2 -11  -6 868.566 127.804  28
  -2 -11   6 624.777 113.142  20
   2 -11  -5 1684.41 177.280  27
   2 -11  -4 8696.60 390.822  27
   2 -11  -3 42707.0 1134.43  27
   2 -11  -3 44775.9 1853.84   6
   2 -11  -2 646.405 121.225  15
   2 -11  -2 774.001 126.138  27
   2 -11  -1 12871.3 925.064   6
   2 -11  -1 11437.8 470.337  15
   2 -11   0 23474.0 1313.90   6
   2 -11   0 21707.5 711.879  15
   2 -11   1 7652.30 362.012  20
   2 -11   1 7196.10 736.702   6
   2 -11   1 7674.81 382.519  15
   2 -11   2 9238.98 412.604  20
   2 -11   2 8406.68 420.329  15
   2 -11   2 9142.82 858.020   6
   2 -11   3 11700.0 488.114  20
   2 -11   4 5051.02 308.667  20
   2 -11   5 2829.08 227.768  20
   2 -11   6 1047.75 130.748  20
   2 -11   6 1068.73 123.596  15
  -2 -10   8 2360.47 160.521  20
   2 -10  -8 2259.96 153.991  27
   2 -10  -7 12247.9 437.917  27
   2 -10  -7 12730.4 429.798  28
   2 -10  -6 5357.70 297.328  27
   2 -10  -6 5401.87 294.149  28
   2 -10  -5 35814.5 989.536  27
   2 -10  -4 7067.27 346.269  27
   2 -10  -4 7020.74 680.219   6
   2 -10  -3 294.926 92.4842  27
   2 -10  -3 428.215 193.661   6
   2 -10  -2 2413.97 197.674  15
   2 -10  -2 2256.79 368.240   6
   2 -10  -1 15228.3 991.596   6
   2 -10   0 1490.08 333.626   6
   2 -10   1 3223.17 486.876   6
   2 -10   1 2995.63 227.808  15
   2 -10   2 4511.06 279.357  20
   2 -10   3 7482.59 383.074  20
   2 -10   4 19154.8 673.635  20
   2 -10   4 18492.7 661.454  29
   2 -10   5 26351.7 824.687  20
   2 -10   5 25385.1 805.194  29
   2 -10   6 3968.00 262.191  20
   2 -10   6 3627.36 242.588  29
   2 -10   7 435.078 93.1444  20
   2  -9  -8 6886.90 296.444  27
   2  -9  -8 6733.22 277.585  28
   2  -9  -7 558.980 115.979  27
   2  -9  -7 668.018 123.189  28
   2  -9  -6 31068.6 873.332  28
   2  -9  -6 31695.6 896.964  27
   2  -9  -5 37744.2 1672.47   6
   2  -9  -5 37145.5 1015.80  27
   2  -9  -4 44466.2 1783.64   6
   2  -9  -4 42021.0 1107.41  27
   2  -9  -3 41117.4 1682.60   6
   2  -9  -2 10898.8 787.877   6
   2  -9  -1 36982.9 1569.65   6
   2  -9   0 4790.91 539.415   6
   2  -9   1 2601.11 434.730   6
  -2  -9  -1 3154.24 369.487   6
  -2  -9  -2 14290.1 842.485   6
   2  -9   3 7112.33 378.399  20
  -2  -9  -3 7990.90 649.275   6
   2  -9   3 7451.12 377.197  29
   2  -9   4 6705.44 376.165  20
   2  -9   4 6417.83 360.126  29
  -2  -9  -4 6109.64 594.315   6
   2  -9   5 5198.43 334.596  20
   2  -9   5 5098.17 320.011  29
   2  -9   6 327.049 128.159  20
   2  -9   6 200.874 102.470  29
   2  -9   7 2103.16 181.787  20
   2  -9   7 1975.26 175.990  29
   2  -8  -9 296.218 73.1145  27
   2  -8  -9 412.662 72.7879  23
   2  -8  -8 6271.62 302.620  27
   2  -8  -8 6152.21 284.946  28
   2  -8  -7 5614.66 293.090  28
   2  -8  -7 5312.57 304.160  27
   2  -8  -6 8367.23 383.453  27
   2  -8  -6 8235.65 364.177  28
   2  -8  -6 7194.90 677.617   6
   2  -8  -5 15737.2 554.119  27
   2  -8  -5 16421.0 1025.01   6
   2  -8  -4 845.222 263.179   6
   2  -8  -3 12349.5 803.616   6
   2  -8  -3 10859.1 757.855   7
   2  -8  -2 11322.8 752.027   6
  -2  -8   1 8042.50 569.991   6
   2  -8  -1 8542.84 661.121   6
   2  -8   0 18755.4 1044.01   6
   2  -8   0 18837.1 914.941   8
  -2  -8   0 21020.9 933.040   6
   2  -8   1 106789. 2958.58   8
  -2  -8  -1 113495. 2942.36   6
   2  -8   2 3855.10 437.856   8
  -2  -8  -2 4238.02 420.855   6
  -2  -8  -3 549.775 189.353   6
   2  -8   4 2755.08 239.635  20
  -2  -8  -4 2465.28 368.651   6
   2  -8   4 2645.94 229.539  29
   2  -8   5 8749.51 431.669  29
   2  -8   5 9207.28 445.086  20
   2  -8   6 19324.7 691.993  20
   2  -8   6 18867.5 677.388  29
   2  -8   7 7484.72 362.348  20
   2  -8   7 7247.58 360.799  29
   2  -8   8 6042.05 266.587  20
   2  -8   8 6181.42 280.896  29
   2  -7  -9 1908.27 143.217  23
   2  -7  -9 1948.02 155.884  27
   2  -7  -8 3770.24 240.364  27
   2  -7  -8 3319.34 216.491  28
   2  -7  -7 31821.6 906.026  27
   2  -7  -7 31172.7 875.015  28
   2  -7  -6 6361.57 328.433  27
   2  -7  -6 6450.52 314.990  28
   2  -7  -6 6587.51 633.141   6
   2  -7  -5 21686.2 1154.84   6
   2  -7  -4 20040.1 1042.55   6
   2  -7  -3 36289.3 1404.53   6
   2  -7  -3 34010.4 1373.00   7
   2  -7  -2 18.4923 146.991   6
   2  -7  -1 10348.3 684.158   6
  -2  -7   1 10524.9 609.876   6
   2  -7   0 46636.5 1547.22   8
   2  -7   0 44135.3 1652.84   6
  -2  -7   0 49392.6 1505.96   6
  -2  -7  -1 30077.3 1117.10   6
   2  -7   1 30576.1 1221.50   8
   2  -7   2 1525.01 282.737   8
  -2  -7  -2 1441.99 238.428   6
  -2  -7  -3 8401.83 607.416   6
   2  -7   3 7615.21 645.893   8
   2  -7   4 30936.0 1491.17   8
  -2  -7  -4 33246.5 1377.32   6
  -2  -7  -5 5184.91 557.052   6
   2  -7   5 5845.78 352.082  20
   2  -7   5 6049.62 348.495  29
   2  -7   5 5050.83 619.759   8
   2  -7   6 4940.54 326.059  20
   2  -7   6 5075.11 328.218  29
   2  -7   7 7763.86 390.593  29
   2  -7   7 7477.59 371.371  20
   2  -7   8 2788.14 206.505  29
   2  -7   8 2849.74 190.760  20
   2  -6  -9 5773.02 285.085  27
   2  -6  -9 5501.78 256.611  23
   2  -6  -8 10612.8 436.315  27
   2  -6  -7 30011.1 835.446  28
   2  -6  -7 29131.1 865.328  27
   2  -6  -6 27872.8 1329.14   6
   2  -6  -6 27567.5 808.427  27
   2  -6  -6 27461.4 782.303  28
   2  -6  -5 5116.56 515.023   6
   2  -6  -4 3252.01 383.203   6
   2  -6  -3 12042.6 698.333   6
   2  -6  -3 12237.0 713.996   7
   2  -6  -2 9698.67 599.777   6
  -2  -6   1 37332.5 1221.43   6
   2  -6  -1 37959.8 1351.87   6
   2  -6   0 22516.0 947.679   8
  -2  -6   0 24353.8 892.394   6
  -2  -6  -1 224023. 4947.25   6
   2  -6   1 221628. 5140.83   8
  -2  -6  -2 45500.8 1431.49   6
   2  -6   2 43677.1 1584.20   8
  -2  -6  -3 6915.75 522.976   6
   2  -6   3 6513.11 592.252   8
  -2  -6  -4 8411.89 619.216   6
   2  -6   4 8312.61 725.491   8
  -2  -6  -5 12712.0 840.433   6
   2  -6   5 12420.2 962.305   8
   2  -6   5 13056.1 530.878  29
   2  -6   6 13557.0 558.312  29
   2  -6   6 12116.3 998.144   8
  -2  -6  -6 13246.5 913.996   6
   2  -6   7 7457.08 377.969  20
   2  -6   7 7432.12 397.673  29
   2  -6   8 3587.35 224.468  20
   2  -6   8 3924.20 256.148  29
   2  -5  -9 3250.27 203.923  23
   2  -5  -9 3110.31 223.456  27
   2  -5  -8 1844.56 196.419  27
   2  -5  -7 3882.00 247.165  28
   2  -5  -7 3902.13 260.382  27
   2  -5  -7 3880.85 498.400   6
   2  -5  -6 2192.35 181.252  27
   2  -5  -6 1945.59 338.453   6
   2  -5  -6 2053.16 166.753  28
   2  -5  -5 32616.3 1331.72   6
   2  -5  -4 106275. 2777.67   6
   2  -5  -4 98881.4 2723.55   7
   2  -5  -3 251469. 5517.71   6
   2  -5  -3 240106. 5547.84   7
   2  -5  -2 11443.4 607.782   6
   2  -5  -1 97175.2 2506.84   8
   2  -5  -1 101806. 2527.55   6
  -2  -5   0 65844.2 1696.75   6
   2  -5   0 65652.4 1850.56   8
  -2  -5  -1 6139.52 376.282   6
   2  -5   1 6347.45 470.378   8
   2  -5   2 37640.0 1384.79   8
  -2  -5  -2 36795.1 1187.60   6
  -2  -5  -3 6136.83 459.588   6
   2  -5   3 6059.60 549.123   8
  -2  -5  -4 3084.86 368.988   6
  -2  -5  -5 23918.9 1170.44   6
   2  -5   6 3745.40 280.028  18
   2  -5   6 3479.12 533.291   8
  -2  -5  -6 3629.47 478.240   6
   2  -5   6 3968.73 286.004  29
   2  -5   7 9872.50 449.938  20
   2  -5   7 9740.22 454.302  18
   2  -5   7 10761.0 484.879  29
   2  -5   8 2234.29 211.870  29
   2  -5   9 1736.40 152.909  29
   2  -4 -10 1243.16 102.852  23
   2  -4  -9 1937.83 166.477  23
   2  -4  -9 1813.85 179.324  27
   2  -4  -8 7169.43 368.708  27
   2  -4  -7 7024.37 354.648  27
   2  -4  -7 6850.69 325.514  28
   2  -4  -7 6962.72 642.624   6
   2  -4  -6 7845.05 629.316   6
   2  -4  -5 3134.65 365.630   6
   2  -4  -4 13070.3 698.184   6
   2  -4  -4 12710.0 690.218   7
   2  -4  -3 11190.1 575.037   6
   2  -4  -3 10539.3 600.601   7
   2  -4  -2 23143.2 849.924   6
   2  -4  -1 4396.25 337.176   6
  -2  -4   1 3829.33 549.594   2
   2  -4  -1 4588.05 350.721   8
   2  -4   0 157865. 3648.87   8
   2  -4   0 160746. 3684.12   3
  -2  -4   0 155342. 3419.52   6
  -2  -4  -1 25719.4 814.572   6
   2  -4   1 26475.4 994.181   8
  -2  -4  -2 26357.1 896.323   6
   2  -4   2 26158.0 1079.19   8
  -2  -4  -3 4687.76 373.350   6
  -2  -4  -4-33.9268 97.4292   6
  -2  -4  -5 33828.9 1397.15   6
   2  -4   6 10030.9 471.435  18
   2  -4   6 10542.7 479.406  29
  -2  -4  -6 10649.5 798.645   6
   2  -4   7 17173.0 656.609  18
   2  -4   7 18474.1 678.487  29
   2  -4   8 2439.97 209.899  18
   2  -4   8 2648.33 238.887  29
   2  -4   9 821.818 123.245  29
   2  -3 -10 943.115 96.4405  23
  -2  -3   9 4227.49 252.470  29
   2  -3  -9 4529.16 249.686  23
  -2  -3   8-46.5057 87.4755  29
   2  -3  -8 102.175 108.229  27
   2  -3  -8 121.748 95.5104  23
   2  -3  -7 19014.4 631.745  27
   2  -3  -7 18796.8 594.950  28
   2  -3  -7 17441.1 1031.81   6
   2  -3  -6 14501.0 853.761   6
   2  -3  -5 1653.24 258.921   6
   2  -3  -4 2809.95 295.962   6
   2  -3  -4 2619.45 304.131   7
   2  -3  -3 25355.5 876.371   6
   2  -3  -3 24035.8 930.660   7
   2  -3  -2 61814.7 2928.05   1
   2  -3  -2 64618.8 1655.29   6
   2  -3  -2 67901.3 1773.81   7
   2  -3  -1 30039.3 975.230   8
   2  -3  -1 29864.8 921.166   6
  -2  -3   1 32801.8 1684.27   3
  -2  -3   1 29182.9 1150.98   1
   2  -3   0 85203.4 2152.85   8
  -2  -3   0 81947.1 2945.50   4
  -2  -3  -1 105306. 3786.37   4
  -2  -3  -1 111170. 2396.20   6
  -2  -3  -1 123690. 3661.72   3
   2  -3   1 93013.0 2639.02   3
   2  -3   1 110111. 2659.83   8
  -2  -3  -2 9592.36 455.342   6
  -2  -3  -3 66265.6 1796.57   6
  -2  -3  -4 12818.0 702.883   6
  -2  -3  -5 17612.2 938.354   6
   2  -3   6 1572.31 216.300  14
  -2  -3  -6 1541.65 320.149   6
   2  -3   6 1903.87 204.787  29
   2  -3   7 5724.86 355.597  29
   2  -3   8 1983.92 204.924  18
   2  -3   8 2459.07 236.951  29
   2  -3   9 430.984 92.3685  18
   2  -3   9 584.775 118.245  29
  -2  -2  10 5622.82 254.661  29
  -2  -2   9 860.651 132.308  29
   2  -2  -9 863.271 125.312  23
   2  -2  -8 36.6027 88.5219  27
   2  -2  -8 79.0489 91.4715  23
  -2  -2   8-17.5402 98.7876  29
   2  -2  -7 19075.3 1049.24   6
   2  -2  -7 19368.9 639.251  27
   2  -2  -7 18972.3 656.323  21
  -2  -2   7 18277.9 645.982  29
   2  -2  -6 885.002 220.363   6
   2  -2  -5 6321.94 493.621   7
   2  -2  -5 6690.34 494.204   6
   2  -2  -4 9550.01 512.411   6
   2  -2  -4 9342.99 566.489   7
   2  -2  -3 7228.37 393.325   6
   2  -2  -3 6795.57 445.045   7
   2  -2  -2 29651.6 863.125   6
   2  -2  -2 32301.9 1792.45   1
   2  -2  -2 31066.4 988.875   7
  -2  -2   1 100170. 2893.84   1
  -2  -2   1 98636.2 2821.77   4
  -2  -2   0 36577.3 1519.16   3
  -2  -2   0 31154.8 1518.24   4
  -2  -2  -1 327493. 7404.77   3
  -2  -2  -1 288110. 7750.84   4
  -2  -2  -2 117128. 2650.28   6
   2  -2   3 19049.1 899.680   5
  -2  -2  -3 19241.0 759.302   6
   2  -2   4 46361.9 1689.86   5
  -2  -2  -4 45104.5 1489.06   6
  -2  -2  -5 4521.17 451.524   6
   2  -2   5 4393.16 531.516   5
   2  -2   6 13910.6 641.475  14
   2  -2   6 14915.9 578.818  29
  -2  -2  -6 15202.8 944.913   6
   2  -2   7 2349.08 279.406  14
   2  -2   7 2776.29 251.469  29
   2  -2   8 1698.46 198.884  29
   2  -2   9 2425.20 191.181  18
   2  -2   9 2680.25 210.259  29
  -2  -1  10 9484.11 362.800  29
   2  -1  -9 4196.88 249.366  23
  -2  -1   9 3890.22 262.175  29
   2  -1  -9 3480.14 249.737  21
  -2  -1   8 60.8617 90.3710  29
   2  -1  -8 230.962 98.5923  23
   2  -1  -8 79.8052 83.9186  21
   2  -1  -8-16.2187 91.1998  27
  -2  -1   7 10088.5 456.372  29
   2  -1  -7 11351.1 454.516  27
   2  -1  -7 10457.3 471.364  21
   2  -1  -7 11402.5 435.318  23
   2  -1  -7 11200.3 782.153   6
   2  -1  -6 5337.79 503.319   6
   2  -1  -5 26078.2 1073.22   7
   2  -1  -5 26180.1 1036.50   6
   2  -1  -4 79093.1 2058.07   6
   2  -1  -4 84367.2 2211.23   7
   2  -1  -3 10198.5 535.518   7
   2  -1  -3 9813.84 439.449   6
   2  -1  -2 30364.8 1655.13   1
   2  -1  -2 30345.0 947.433   7
  -2  -1   1 87512.1 2707.70   1
  -2  -1   0 55427.8 1775.97   3
  -2  -1  -1 553749. 12594.2   4
  -2  -1  -1 588454. 11900.1   3
   2  -1   1 552340. 11279.8   5
   2  -1   1 547057. 11419.9   3
  -2  -1  -2 76534.9 3126.74   4
   2  -1   2 80706.2 2040.69   5
  -2  -1  -2 75693.9 1841.63   6
   2  -1   3 81191.5 2193.15   5
  -2  -1  -3 74534.9 1969.53   6
  -2  -1  -4 1014.82 204.064   6
   2  -1   4 1125.76 265.513   5
  -2  -1  -5 31557.6 1280.30   6
   2  -1   5 30866.4 1446.94   5
   2  -1   6 872.309 311.312   5
   2  -1   7 4866.27 325.133  29
   2  -1   7 5099.41 380.447  14
   2  -1   8 10840.8 565.815  14
   2  -1   8 12786.2 534.370  29
   2  -1   9 7229.05 346.465  18
   2  -1   9 7290.13 348.761  29
  -2   0  10 5482.28 271.737  29
   2   0  -9 19764.6 618.728  23
  -2   0   9 20594.1 685.920  29
   2   0  -9 18817.2 657.521  21
   2   0  -8 4162.78 295.000  21
  -2   0   8 4216.69 292.717  29
   2   0  -8 4123.31 263.217  23
   2   0  -7 4309.88 252.520  23
   2   0  -7 4332.11 290.570  21
   2   0  -7 3959.30 263.942  27
  -2   0   7 4382.95 289.501  29
   2   0  -6 19510.8 961.268   6
   2   0  -5 399.288 151.707   7
   2   0  -5 292.498 117.814   6
   2   0  -4 5012.56 413.316   7
   2   0  -4 5309.73 360.884   6
  -2   0   4 5382.44 361.949   5
  -2   0   3 10601.4 432.214   5
   2   0  -3 10662.8 546.035   7
   2   0  -3 10348.0 441.563   6
   2   0  -2 3386.65 519.733   1
  -2   0   2 2743.63 283.062   2
  -2   0   1 98766.2 3047.22   1
  -2   0   0 178055. 3955.25   3
   2   0   1 3558.73 355.008   3
   2   0   1 3633.22 252.043   5
   2   0   2 457300. 9150.87   5
   2   0   2 437298. 9871.12   3
  -2   0  -2 431223. 8972.39   6
   2   0   3 3308.95 341.485   5
  -2   0  -3 3919.29 313.368   6
   2   0   4 14717.3 830.228   5
  -2   0  -4 14348.7 731.208   6
   2   0   5 7597.00 671.449   5
   2   0   6 14833.2 1063.80   5
   2   0   7 336.552 184.385   5
   2   0   7 672.148 163.948  14
   2   0   7 635.175 140.418  29
   2   0   8 1137.37 178.004  29
   2   0   8 1033.18 202.985  14
   2   0   9 67.1919 88.3134  29
  -2   1  10 10426.9 398.991  29
   2   1  -9 4018.19 281.210  21
  -2   1   9 4222.54 286.392  29
   2   1  -8 6.34493 87.6970  21
  -2   1   8 81.8443 104.231  29
   2   1  -8 19.5484 87.7855  23
  -2   1   7 10717.5 481.665  29
   2   1  -7 10905.2 430.259  23
   2   1  -7 10959.2 486.036  21
   2   1  -6 5979.16 546.411   7
   2   1  -5 25911.1 1019.74   6
  -2   1   5 25663.8 1054.46   5
   2   1  -5 25567.9 1108.26   7
  -2   1   4 79736.6 2056.72   5
   2   1  -4 78194.7 2014.93   6
   2   1  -4 79188.8 2157.75   7
  -2   1   3 9995.93 455.259   5
  -2   1   3 9257.40 663.427   4
   2   1  -3 10259.0 533.457   7
   2   1  -3 11029.8 979.057   1
   2   1  -3 9346.18 419.776   6
  -2   1   2 28837.4 1271.86   2
   2   1  -2 31641.5 1480.82   1
   2   1   0 54159.6 1782.35   3
   2   1   1 550274. 11927.6   3
   2   1   1 558785. 11209.7   5
   2   1   2 74626.6 2627.85   3
   2   1   2 77386.7 1978.41   5
  -2   1  -3 75838.7 1929.67  11
   2   1   3 78071.2 2132.07   5
   2   1   4 1151.22 261.644   5
  -2   1  -4 808.697 156.789  11
   2   1   5 33486.5 1474.65   5
   2   1   6 1265.53 344.514   5
   2   1   7 5426.60 386.868  14
   2   1   7 4935.73 644.964   5
   2   1   7 5363.53 335.582  29
   2   1   8 12395.4 598.684  14
   2   1   8 12662.8 531.023  29
   2   1   9 6862.85 331.465  29
   2   1   9 5767.40 360.229  14
  -2   2  10 6122.43 293.047  29
  -2   2   9 930.523 157.013  29
   2   2  -9 610.435 127.597  21
  -2   2   8 32.4899 102.862  29
   2   2  -8 102.617 85.4718  23
   2   2  -8-60.1197 110.140  21
   2   2  -7 20298.8 698.600  21
  -2   2   7 19103.6 689.488  29
   2   2  -7 18832.2 626.339  23
   2   2  -6 951.236 252.510   7
  -2   2   6 670.553 207.012   5
  -2   2   5 6569.18 509.672   5
   2   2  -5 6622.84 556.578   7
  -2   2   4 9668.54 551.858   5
   2   2  -4 9566.68 515.977   9
   2   2  -4 8690.61 604.056   7
   2   2  -3 7346.79 419.704   9
   2   2  -3 7118.00 727.009   1
   2   2  -3 6818.62 471.811   7
  -2   2   3 5878.86 664.690   4
  -2   2   3 7103.13 415.785   5
   2   2  -2 30776.8 979.223   9
   2   2  -2 32571.9 1009.69   7
  -2   2   2 33513.2 1592.01   2
   2   2  -1 108821. 2343.92   7
  -2   2   1 92295.0 2399.67   3
   2   2   0 34473.4 1526.67   3
   2   2   1 298520. 7223.23   3
   2   2   1 297404. 6259.57   5
   2   2   1 306182. 6318.21  10
  -2   2  -1 305919. 6269.86  11
   2   2   2 122566. 3897.43   3
  -2   2  -2 126186. 2887.43  11
   2   2   2 128238. 2992.09   5
   2   2   3 19640.1 883.952   5
  -2   2  -3 19458.8 751.119  11
  -2   2  -4 44518.9 1376.29  11
   2   2   4 47267.3 1662.50   5
   2   2   5 4686.46 535.918   5
   2   2   6 14739.6 613.912  14
   2   2   6 15075.4 574.744  29
   2   2   6 15803.0 1077.84   5
   2   2   7 2701.68 242.025  29
   2   2   7 3202.55 525.804   5
   2   2   7 2946.20 292.200  14
   2   2   8 1511.68 184.014  29
   2   2   8 1609.44 235.691  14
   2   2   9 2123.22 223.158  14
   2   2   9 2149.95 179.566  29
  -2   3  10 997.012 127.946  29
  -2   3   9 4997.29 315.146  29
  -2   3   8 34.4499 105.529  29
   2   3  -8 6.98928 111.749  21
   2   3  -7 18214.2 612.488  23
  -2   3   7 18986.3 690.580  29
   2   3  -7 18636.3 684.352  21
  -2   3   6 15284.1 922.362   5
   2   3  -6 14870.6 942.313   7
   2   3  -5 1424.20 293.398   7
  -2   3   5 1601.26 283.407   5
   2   3  -4 2871.74 313.712   9
   2   3  -4 2673.35 333.690   7
  -2   3   4 2756.48 320.169   5
  -2   3   3 27819.5 1687.21   4
   2   3  -3 24357.3 972.833   7
   2   3  -3 27222.6 970.086   9
  -2   3   3 25510.6 950.941   5
   2   3  -2 68829.9 1764.37   9
   2   3  -2 69128.5 1762.13   7
  -2   3   2 58505.9 2126.57   3
  -2   3   2 60794.3 1557.97  11
  -2   3   2 69092.8 2729.31   2
   2   3  -1 31858.1 945.514   7
   2   3  -1 30493.0 1008.91   9
  -2   3   1 31601.7 909.722  11
  -2   3   0 89055.9 3091.24   1
   2   3   0 88511.5 3033.21   3
  -2   3   0 87392.9 2068.53  11
   2   3   1 112353. 3609.44   3
   2   3   1 110574. 2593.22  10
   2   3   1 108332. 2552.88   5
  -2   3  -1 114500. 2593.29  11
   2   3   2 9591.58 526.665   5
  -2   3  -2 9912.07 497.007  11
   2   3   3 69214.1 2039.74   5
  -2   3  -3 69817.9 1875.32  11
  -2   3  -4 13054.2 661.974  11
   2   3   4 13840.4 836.936   5
   2   3   5 17687.8 1064.06   5
   2   3   6 1488.20 175.737  29
   2   3   6 1672.41 203.789  14
   2   3   6 1438.32 362.518   5
   2   3   7 5102.67 326.163  29
   2   3   7 5514.84 367.355  14
   2   3   8 2220.97 257.097  14
   2   3   8 1999.64 204.092  29
   2   3   9 402.575 95.1231  29
   2   3   9 405.368 136.245  14
  -2   4  10 1441.43 137.971  29
  -2   4   9 1891.61 198.415  29
  -2   4   8 7630.65 417.596  29
   2   4  -8 6528.91 392.032  21
  -2   4   7 6687.87 384.647  29
   2   4  -7 6838.38 381.344  21
  -2   4   6 8337.19 695.834   5
  -2   4   5 3526.79 421.892   5
   2   4  -5 3439.77 436.404   7
   2   4  -4 13181.1 737.454   9
  -2   4   4 14141.5 775.097   5
   2   4  -4 13638.2 781.788   7
  -2   4   3 11167.0 635.986   5
   2   4  -3 12209.9 669.310   7
   2   4  -3 11629.3 655.222   9
   2   4  -2 25644.2 961.376   9
  -2   4   2 25466.3 1773.36   2
   2   4  -2 25385.6 937.363   7
  -2   4   2 22807.2 814.620  11
   2   4  -1 4754.66 369.535   9
   2   4  -1 4888.52 605.438   4
   2   4  -1 4894.27 337.146   7
  -2   4   1 4000.27 425.102   3
  -2   4   1 4297.13 708.274   2
  -2   4   1 4585.47 325.533  11
  -2   4   0 162344. 4733.17   1
   2   4   0 162729. 4885.24   4
   2   4   0 162724. 4877.39   3
   2   4   0 152427. 3390.21   5
  -2   4   0 156579. 3530.34  11
   2   4   1 26390.3 907.763   5
  -2   4  -1 28221.2 1651.42   1
  -2   4  -1 28205.0 951.146  11
   2   4   2 25227.6 900.288  10
   2   4   2 25185.8 967.425   5
  -2   4  -2 26828.6 962.213  11
   2   4   3 4465.94 427.316   5
  -2   4  -3 5201.72 410.565  11
  -2   4  -4-10.9967 95.5226  11
   2   4   4 73.8417 172.148   5
   2   4   5 35154.6 1597.25   5
   2   4   6 10950.6 915.458   5
   2   4   6 11025.5 500.269  14
   2   4   6 9871.08 442.879  16
   2   4   7 19689.5 729.486  14
   2   4   7 16885.9 638.231  29
   2   4   8 2884.30 269.676  14
   2   4   8 2344.46 210.087  29
   2   4   9 812.875 106.432  29
   2   4   9 697.768 151.515  14
  -2   5   9 3353.81 248.009  29
  -2   5   8 1931.23 221.422  29
  -2   5   7 3682.45 285.536  29
   2   5  -7 3550.52 278.136  21
  -2   5   7 2983.41 467.544   5
  -2   5   6 2143.89 207.315  29
   2   5  -6 2032.38 204.123  21
  -2   5   6 2076.24 379.343   5
   2   5  -5 35858.3 1439.68   9
  -2   5   5 32802.2 1451.36   5
   2   5  -4 117950. 3127.64   9
  -2   5   4 110897. 3115.67   5
   2   5  -3 267133. 6035.53   9
   2   5  -3 269615. 6011.00   7
  -2   5   3 258224. 5992.34   5
   2   5  -2 12473.2 694.283   9
  -2   5   2 11824.3 590.515  11
   2   5  -2 11947.6 651.026   7
   2   5  -1 100024. 2577.28   9
   2   5  -1 102252. 3604.51   4
  -2   5   1 97782.7 2454.00  11
   2   5   0 65688.7 2965.87   4
  -2   5   0 67067.7 1788.53  11
   2   5   0 62557.7 1665.73   5
   2   5   1 5822.68 403.554   5
  -2   5  -1 5086.72 698.417   1
  -2   5  -1 5965.42 424.760  11
   2   5   2 36484.6 1292.99   5
  -2   5  -2 38118.7 1287.41  11
   2   5   3 6774.04 555.828   5
  -2   5  -3 6305.43 479.609  11
   2   5   4 3296.90 439.721   5
  -2   5  -4 3114.80 357.816  11
   2   5   5 24129.6 1321.26   5
   2   5   6 3505.12 550.728   5
   2   5   6 3819.00 270.695  16
   2   5   6 3845.83 306.505  14
   2   5   7 10313.0 513.145  14
   2   5   8 2469.04 243.188  14
   2   5   9 1686.61 172.302  14
  -2   6   9 5777.85 310.017  29
  -2   6   8 9891.11 467.700  29
  -2   6   7 29464.8 937.158  29
  -2   6   6 27816.2 1425.37   5
  -2   6   6 27474.2 868.575  29
   2   6  -6 26444.8 849.408  21
   2   6  -5 5549.65 567.113   9
  -2   6   5 5829.00 597.969   5
   2   6  -4 3219.09 424.894   9
  -2   6   4 2483.06 383.573   5
   2   6  -3 11404.6 753.659   9
  -2   6   3 11900.4 763.855   5
   2   6  -2 10523.1 686.528   9
  -2   6   2 9549.46 575.005  11
   2   6  -1 37453.2 1361.20   9
  -2   6   1 39092.9 1310.47  11
  -2   6   0 23200.7 956.755  11
  -2   6  -1 230592. 5106.80  11
   2   6   1 217286. 5020.84   5
   2   6   2 43638.2 1525.82   5
  -2   6  -2 46186.9 1532.38  11
   2   6   3 7250.27 596.258   5
  -2   6  -3 7439.50 566.079  11
   2   6   4 9502.32 760.705   5
  -2   6  -4 8875.95 634.239  11
   2   6   5 12497.9 954.286   5
   2   6   5 12995.5 517.703  16
   2   6   6 13827.9 548.963  16
   2   6   6 13785.7 596.736  14
   2   6   6 13803.5 1047.06   5
   2   6   7 7586.51 423.904  14
   2   6   8 4127.41 303.045  14
  -2   7   9 1965.15 173.982  29
  -2   7   8 3325.27 257.472  29
  -2   7   7 31110.6 968.438  29
  -2   7   6 6739.75 702.223   5
  -2   7   6 6607.78 379.273  29
   2   7  -5 23001.0 1248.74   9
  -2   7   5 22099.6 1253.90   5
   2   7  -4 20662.1 1152.55   9
  -2   7   4 21311.1 1179.60   5
   2   7  -3 38284.9 1557.07   9
  -2   7   3 36447.6 1538.79   5
   2   7  -2 124.264 164.885   9
  -2   7   2 153.638 116.774  11
   2   7  -1 10056.1 684.266   9
  -2   7   1 10178.6 639.974  11
  -2   7   0 50383.4 1661.80  11
   2   7   1 28695.8 1148.13   5
  -2   7  -1 30087.6 1215.93  11
   2   7   2 1402.99 268.052   5
  -2   7  -2 1667.79 293.972  11
   2   7   3 8155.05 662.291   5
  -2   7  -3 8162.97 635.432  11
   2   7   4 33056.8 1544.39   5
  -2   7  -4 33546.1 1399.00  11
   2   7   5 5807.76 666.343   5
   2   7   5 5549.02 339.501  22
   2   7   5 5817.98 337.900  16
   2   7   6 5050.51 311.759  16
   2   7   6 4756.55 344.991  14
   2   7   7 8064.19 432.242  14
   2   7   8 3562.34 258.853  14
  -2   8   9 445.357 93.8500  29
  -2   8   8 6405.74 312.618  14
  -2   8   8 6598.61 343.118  29
  -2   8   7 5469.32 339.603  29
  -2   8   6 7623.62 404.916  29
   2   8  -5 17257.5 1103.47   9
  -2   8   5 16843.2 606.134  22
  -2   8   5 15870.6 613.987  29
  -2   8   5 17506.5 1147.05   5
  -2   8   4 705.340 270.725   5
   2   8  -4 774.432 274.766   9
   2   8  -3 12438.1 879.401   9
  -2   8   3 12618.7 894.360   5
   2   8  -2 11481.5 798.920   9
  -2   8   2 10482.2 717.573  11
  -2   8   1 8590.45 638.868  11
   2   8  -1 8040.10 654.645   9
  -2   8   0 20728.7 1028.95  11
  -2   8  -1 113829. 3158.26  11
  -2   8  -2 4867.98 506.396  11
   2   8   2 4197.83 463.090   5
  -2   8  -3 398.364 179.379  11
   2   8   3 603.442 236.811   5
  -2   8  -4 2515.45 375.904  11
   2   8   4 2789.12 239.948  22
   2   8   4 2944.46 461.833   5
   2   8   5 8876.64 814.933   5
   2   8   5 8700.81 425.772  16
   2   8   5 8564.75 441.458  22
   2   8   6 19385.5 676.871  16
   2   8   6 19877.3 715.848  14
   2   8   7 8120.76 411.947  14
   2   8   8 6758.73 335.532  14
  -2   9   8 6770.38 301.410  14
  -2   9   8 6779.49 321.974  29
  -2   9   7 742.894 140.889  29
  -2   9   6 30089.7 935.438  29
  -2   9   6 30839.9 904.768  22
   2   9  -5 39174.6 1795.59   9
  -2   9   5 37058.9 1085.90  29
  -2   9   5 40023.7 1846.59   5
  -2   9   5 37888.0 1074.50  22
   2   9  -4 45712.6 1930.30   9
  -2   9   4 41559.1 1166.41  29
  -2   9   4 44988.0 1939.34   5
   2   9  -3 42046.6 1825.30   9
  -2   9   3 42897.6 1859.37   5
   2   9  -2 10606.4 814.428   9
   2   9  -1 31748.2 1454.75   9
  -2   9   1 33820.8 1452.73  11
  -2   9   0 4841.95 528.485  11
  -2   9  -1 2842.03 411.228  11
  -2   9  -2 14107.9 923.913  11
   2   9   3 7725.35 703.860   5
   2   9   3 7649.22 389.643  22
  -2   9  -3 7778.61 695.508  11
   2   9   4 6142.06 669.615   5
   2   9   4 6599.89 376.553  22
   2   9   5 4768.12 327.160  22
   2   9   5 5210.35 326.214  16
   2   9   6 323.095 120.666  16
   2   9   6 189.323 122.331  14
   2   9   7 2080.86 206.025  14
  -2  10   8 2491.00 168.857  29
  -2  10   8 2302.14 155.909  14
  -2  10   7 11495.2 460.408  29
  -2  10   6 4742.44 302.237  29
  -2  10   6 5045.78 301.150  22
  -2  10   5 34353.8 1028.33  29
  -2  10   5 37211.1 1046.59  22
   2  10  -4 6747.15 718.938   9
  -2  10   4 6889.55 739.034   5
  -2  10   4 6590.24 361.285  29
  -2  10   3 622.328 267.071   5
  -2  10   3 229.624 92.1444  19
   2  10  -3 554.538 249.881   9
  -2  10   3 281.872 117.153  24
  -2  10   3 312.068 110.024  29
  -2  10   2 2656.91 235.644  24
   2  10  -2 2572.09 451.261   9
  -2  10   2 2592.94 445.043   5
  -2  10   1 13516.0 918.008  11
  -2  10   0 1731.11 351.631  11
   2  10   1 3372.17 249.840  19
  -2  10  -1 3515.25 495.382  11
   2  10   2 4649.45 298.124  19
   2  10   2 4520.41 289.319  22
  -2  10  -2 4595.44 552.293  11
   2  10   3 6836.59 375.825  22
  -2  10  -3 6844.56 673.982  11
   2  10   4 17484.6 664.051  22
   2  10   5 26563.1 844.596  16
   2  10   6 3927.90 277.361  14
   2  10   6 4055.91 263.363  16
   2  10   7 419.503 107.147  14
  -2  11   7 4826.20 251.881  14
  -2  11   7 4324.26 240.929  29
  -2  11   6 883.081 135.967  29
  -2  11   6 756.722 129.112  22
  -2  11   5 1574.97 181.123  29
  -2  11   5 1715.54 197.955  22
  -2  11   4 7690.80 388.810  29
  -2  11   4 8202.12 420.404  22
  -2  11   3 37507.7 1107.12  19
   2  11  -3 42375.4 1897.45   9
  -2  11   3 40362.6 1112.60  29
  -2  11   3 44977.7 1966.87   5
  -2  11   2 651.774 308.065   5
  -2  11   2 608.537 128.400  19
  -2  11   2 897.927 168.886  24
  -2  11   1 12620.8 517.423  19
   2  11  -1 12436.0 525.289  19
  -2  11   1 12582.7 527.793  24
   2  11   0 22964.3 758.598  19
  -2  11   0 21957.8 759.531  19
  -2  11   0 22674.4 1276.29  11
  -2  11   0 23020.0 762.071  24
   2  11   1 7393.91 388.584  19
  -2  11  -1 7478.09 382.474  24
  -2  11  -1 7825.54 726.166  11
   2  11   2 8873.49 436.942  19
   2  11   2 8359.96 415.021  22
  -2  11  -2 9315.27 796.665  11
   2  11   3 10416.9 479.919  22
   2  11   4 4820.27 326.789  22
   2  11   5 2252.65 210.775  16
   2  11   6 1227.31 144.959  16
   2  11   6 1434.47 162.515  14
  -2  12   7 3308.44 171.734  29
  -2  12   7 3961.91 199.128  14
  -2  12   6 76.2312 76.2606  29
  -2  12   6 78.9375 81.6207  22
  -2  12   5 3226.93 226.938  29
  -2  12   5 3645.08 256.048  22
  -2  12   4 797.625 128.911  29
  -2  12   4 988.728 159.407  22
  -2  12   3 980.005 142.823  29
  -2  12   2 7198.83 377.008  19
   2  12  -2 6750.66 379.547  19
  -2  12   1 32282.5 963.945  19
   2  12  -1 32155.8 975.726  19
  -2  12   1 32830.2 982.485  24
   2  12   0 5286.49 325.699  19
  -2  12   0 5256.03 327.479  19
  -2  12   0 5444.56 329.125  24
   2  12   1 113.353 104.203  19
  -2  12  -1 159.719 97.1324  24
   2  12   2 2816.97 233.247  22
   2  12   3 4193.83 291.459  22
   2  12   4 3599.27 263.718  16
   2  12   4 3447.72 264.760  22
   2  12   5 1231.55 154.298  16
   2  12   5 1062.48 142.153  14
   2  12   6 4304.00 234.919  14
   2  12   6 4284.34 221.236  16
   2  13  -6 3307.70 179.604  19
  -2  13   6 4314.48 215.204  22
  -2  13   5 332.372 99.8105  22
   2  13  -4 7627.34 369.697  19
  -2  13   4 9342.14 408.274  22
   2  13  -3 995.664 151.886  19
  -2  13   3 1396.07 181.104  22
  -2  13   2 10746.5 466.001  19
   2  13  -2 10731.7 470.986  19
  -2  13   1 32060.4 944.156  19
   2  13  -1 32241.8 952.078  19
   2  13   0 16695.6 614.620  19
  -2  13   0 16980.7 619.162  19
  -2  13   0 16594.2 605.086  24
   2  13   1 1999.99 204.785  19
  -2  13  -1 1924.25 201.155  19
  -2  13  -1 1759.17 181.460  24
   2  13   2 4752.28 285.056  22
   2  13   3 9845.65 430.471  22
   2  13   4 1159.94 151.050  16
   2  13   5 1102.02 124.569  16
   2  13   5 963.321 111.571  14
   2  14  -5 3482.44 180.851  19
  -2  14   5 3878.90 210.204  22
   2  14  -4 1335.88 136.556  19
  -2  14   4 1556.06 152.475  22
   2  14  -3 4716.91 269.360  19
  -2  14   3 5138.79 286.357  22
   2  14  -2 688.508 120.510  19
  -2  14   2 809.144 138.926  22
  -2  14   1 13526.1 505.093  19
   2  14  -1 13390.4 503.619  19
   2  14   0 96.3037 88.3633  19
  -2  14   0 128.268 90.5907  19
  -2  14  -1 6722.62 340.932  19
  -2  14  -2 2723.31 214.884  19
   2  14   2 2367.91 183.895  22
  -2  14  -3 6631.21 324.907  19
   2  14   3 7529.93 337.084  16
  -2  14  -4 2280.14 170.665  19
   2  14   4 2507.46 175.430  16
   2  15  -3 437.585 83.2412  19
  -2  15   3 442.614 94.5474  22
   2  15  -2 3869.45 216.232  19
  -2  15   2 3644.78 217.258  22
  -2  15   1 5216.81 262.198  19
   2  15  -1 5320.01 261.457  19
  -2  15   1 4682.15 250.345  22
  -2  15   0 928.123 121.840  19
  -2  15   0 700.959 99.7091  22
  -2  15  -1 966.441 118.719  19
  -2  15  -2 1797.76 147.237  19
  -2  15  -3 1474.52 123.546  19
   2  15   3 1926.87 141.453  16
   3 -15  -3 8240.05 290.847  27
   3 -15  -2 1420.05 122.956  27
   3 -15  -1 3453.24 185.712  27
   3 -15   0 1149.66 110.434  27
   3 -15   1 2078.96 139.094  27
   3 -15   2 46.7438 50.5034  27
   3 -14  -4 451.843 80.8903  28
   3 -14  -4 556.365 89.1375  27
   3 -14  -3 4150.00 226.021  27
   3 -14  -2 8220.13 335.284  27
   3 -14  -1 4356.33 242.422  27
   3 -14   0 8226.76 342.587  27
   3 -14   1 13401.6 465.526  15
   3 -14   1 12499.9 430.999  20
   3 -14   2 8805.74 347.506  15
   3 -14   2 8147.21 324.454  20
   3 -14   3 3755.30 199.060  15
   3 -14   3 3554.00 191.375  20
   3 -13  -5 6377.33 263.717  28
   3 -13  -5 6231.98 274.463  27
   3 -13  -4 2370.43 184.800  27
   3 -13  -3 14138.7 497.438  27
   3 -13  -2 7419.68 347.961  27
   3 -13  -1 10550.6 430.589  27
   3 -13   0 1217.26 157.001  15
   3 -13   0 1198.97 137.471  20
   3 -13   1 23257.5 704.746  15
   3 -13   1 20796.9 661.032  20
   3 -13   2 11180.9 438.197  15
   3 -13   2 10437.9 419.912  20
   3 -13   3 4894.72 262.596  15
   3 -13   3 4637.99 252.090  20
   3 -13   4 39.2442 67.6832  20
   3 -13   4 73.1451 60.4398  15
   3 -12  -6 3984.38 204.776  28
   3 -12  -6 3678.48 209.848  27
   3 -12  -5 3076.75 214.499  27
   3 -12  -5 3024.19 200.436  28
   3 -12  -4 4972.81 281.613  27
   3 -12  -3 7242.82 344.909  27
   3 -12  -2 10548.1 431.243  27
   3 -12  -1 32300.6 939.428  15
   3 -12   0 3041.94 222.902  20
   3 -12   0 3037.99 236.635  15
   3 -12   1 729.675 126.352  20
   3 -12   1 697.354 134.111  15
   3 -12   2 4640.43 288.965  15
   3 -12   2 4717.92 284.883  20
   3 -12   3 3293.03 235.278  20
   3 -12   3 3628.10 243.978  15
   3 -12   4 1094.37 144.234  20
   3 -12   4 1132.55 136.959  15
   3 -12   5 7396.47 312.093  20
   3 -12   5 7247.58 285.503  15
   3 -11  -7 4873.00 223.147  28
   3 -11  -7 4249.37 228.482  27
   3 -11  -6 5703.24 276.407  28
   3 -11  -6 5297.64 280.731  27
   3 -11  -5 34429.5 952.297  27
   3 -11  -4 160.130 106.748  27
   3 -11  -3 7047.10 356.271  27
   3 -11  -2 12795.9 492.135  27
   3 -11  -2 13192.0 946.401   6
   3 -11  -1 8891.37 410.505  15
   3 -11  -1 8083.94 375.800  20
   3 -11   0 31515.7 920.532  15
   3 -11   0 30312.2 891.108  20
   3 -11   1 51434.2 2159.74   6
   3 -11   1 52000.9 1348.51  20
   3 -11   1 53501.8 1375.52  15
   3 -11   2 3131.80 239.532  20
   3 -11   2 3096.29 242.235  15
   3 -11   3 474.327 122.851  20
   3 -11   3 408.721 118.623  15
   3 -11   4 1275.80 166.428  20
   3 -11   4 1235.14 153.543  15
   3 -11   5 1456.99 156.690  20
   3 -11   5 1182.50 131.574  15
   3 -11   6 10777.7 380.401  20
  -3 -10   8 98.5461 57.6012  20
   3 -10  -8 92.3234 63.2562  27
   3 -10  -7 1334.09 146.021  27
   3 -10  -7 1372.07 143.228  28
   3 -10  -6 5248.23 279.111  28
   3 -10  -6 5035.13 285.250  27
   3 -10  -5 2864.54 222.519  27
   3 -10  -4 1510.86 343.768   6
   3 -10  -4 1615.65 179.834  27
   3 -10  -3 23760.9 1261.30   6
   3 -10  -3 22331.1 709.646  27
   3 -10  -2 6163.29 315.326  27
   3 -10  -2 6955.00 660.893   6
   3 -10  -2 6023.60 317.446  20
   3 -10  -1 33010.0 936.116  15
   3 -10  -1 32101.1 918.292  20
   3 -10   0 12003.8 482.618  15
   3 -10   0 12232.7 920.605   6
   3 -10   0 11698.3 466.229  20
   3 -10   1 42099.8 1139.71  20
   3 -10   1 43024.0 1151.25  15
   3 -10   1 41996.9 1887.07   6
   3 -10   2 27408.6 837.682  20
   3 -10   2 23993.6 865.904  18
   3 -10   2 27631.5 1496.11   6
   3 -10   2 26183.2 817.730  15
   3 -10   3 11490.0 501.501  15
   3 -10   3 13615.4 533.097  20
   3 -10   4 4641.69 301.397  20
   3 -10   4 3880.21 267.817  15
   3 -10   5 4030.61 264.982  20
   3 -10   5 3051.41 216.804  15
   3 -10   6 643.048 115.252  20
   3  -9  -8 1044.09 125.372  27
   3  -9  -7 1892.43 181.130  27
   3  -9  -7 2145.78 182.990  28
   3  -9  -6 2086.95 189.214  28
   3  -9  -6 1825.63 183.690  27
   3  -9  -5 1724.86 182.660  27
   3  -9  -5 1732.12 348.045   6
   3  -9  -4 1126.08 141.176  27
   3  -9  -4 1342.23 303.234   6
   3  -9  -3 26621.0 1311.65   6
   3  -9  -3 25129.5 753.264  27
   3  -9  -3 24647.6 1317.04   7
   3  -9  -2 2374.76 379.484   6
   3  -9  -1 25320.1 1268.51   6
   3  -9   0 34203.4 1562.85   6
   3  -9   1 11544.2 805.842   8
   3  -9   1 11348.3 878.739   6
   3  -9   2 11564.1 530.281  18
   3  -9   2 11654.6 488.541  20
   3  -9   2 10558.3 461.952  15
   3  -9   3 4471.44 293.950  20
   3  -9   3 3956.57 299.743  18
   3  -9   3 4576.52 301.857  29
   3  -9   4 13805.4 554.221  20
   3  -9   4 13247.3 548.869  29
   3  -9   5 7220.45 377.998  20
   3  -9   5 7023.37 382.513  29
   3  -9   6 8204.78 376.313  20
   3  -9   6 8502.65 394.450  29
   3  -9   7 1053.76 117.294  20
   3  -9   7 995.136 127.794  29
   3  -8  -9 301.040 78.4219  27
   3  -8  -9 293.517 71.4367  23
   3  -8  -8 3132.82 198.761  28
   3  -8  -8 2978.01 208.433  27
   3  -8  -7 1680.19 173.149  28
   3  -8  -7 1694.51 182.381  27
   3  -8  -6 1329.38 155.300  28
   3  -8  -6 1250.21 155.903  27
   3  -8  -5 4168.68 498.364   6
   3  -8  -5 3720.92 252.774  27
   3  -8  -4 1755.16 322.965   6
   3  -8  -4 1501.06 155.007  27
   3  -8  -3 5712.20 565.374   6
   3  -8  -3 5792.58 598.284   7
   3  -8  -2 1868.01 316.864   6
   3  -8  -1 9338.37 711.238   6
   3  -8   0 20420.0 1061.85   8
   3  -8   0 20160.4 1099.72   6
   3  -8   1 1535.95 287.800   8
   3  -8   2 9129.35 741.412   8
   3  -8   3 3320.45 252.107  20
   3  -8   3 3196.18 261.260  18
   3  -8   3 3107.45 251.468  29
   3  -8   3 2860.05 441.544   8
   3  -8   4 15621.5 596.791  20
   3  -8   4 14130.4 596.620  18
   3  -8   4 14311.9 1033.72   8
   3  -8   4 16096.6 611.953  29
   3  -8   5 3830.62 277.876  20
   3  -8   5 3915.66 289.711  18
   3  -8   5 4004.71 293.478  29
   3  -8   6 151.886 95.2596  20
   3  -8   6 86.9752 107.734  29
   3  -8   7 4569.10 248.245  20
   3  -8   7 4609.63 270.848  29
   3  -7  -9 2012.79 157.490  27
   3  -7  -9 1942.34 149.489  23
   3  -7  -8 3445.30 235.014  27
   3  -7  -7 14660.7 542.794  27
   3  -7  -7 14887.3 522.241  28
   3  -7  -6 3154.69 429.198   6
   3  -7  -6 3845.03 258.109  27
   3  -7  -6 3696.12 242.030  28
   3  -7  -5 23539.9 1184.67   6
   3  -7  -5 23410.5 715.864  27
   3  -7  -4 437.753 193.522   7
   3  -7  -4 740.918 213.688   6
   3  -7  -3 12264.0 771.281   6
   3  -7  -3 12213.7 834.504   7
   3  -7  -2 47841.2 1658.84   6
   3  -7  -1 9693.07 683.991   6
   3  -7   0 23438.0 1147.68   6
   3  -7   0 24931.9 1132.42   8
   3  -7   1 29072.0 1295.37   8
   3  -7   2 13824.3 907.410   8
   3  -7   3 3617.26 495.875   8
   3  -7   4 11365.2 483.027  20
   3  -7   4 11122.8 501.744  18
   3  -7   4 10458.4 881.186   8
   3  -7   4 11053.1 491.049  29
   3  -7   5 16785.1 637.208  20
   3  -7   5 15548.2 633.053  18
   3  -7   5 16907.6 640.244  29
   3  -7   5 15696.5 1127.45   8
   3  -7   6 11704.7 490.568  20
   3  -7   6 11119.2 496.994  18
   3  -7   6 11622.2 511.781  29
   3  -7   7 2188.37 179.497  20
   3  -7   7 2401.61 213.317  29
   3  -7   8 2944.47 191.285  29
   3  -6  -9 1774.36 161.938  27
   3  -6  -9 2121.14 160.799  23
   3  -6  -8 7872.99 372.181  27
   3  -6  -7 4348.44 259.987  28
   3  -6  -7 4344.41 278.365  27
   3  -6  -6 13404.7 875.118   6
   3  -6  -6 14691.7 513.209  28
   3  -6  -6 14572.3 532.396  27
   3  -6  -5 2771.46 389.727   6
   3  -6  -4 7365.20 579.191   6
   3  -6  -4 7261.39 627.559   7
   3  -6  -3 38564.0 1398.20   6
   3  -6  -3 38743.5 1523.74   7
   3  -6  -2 40546.7 1426.66   6
   3  -6  -1 36538.8 1364.58   8
   3  -6  -1 35025.3 1330.59   6
   3  -6   0 23239.3 1068.31   8
   3  -6   1 21005.1 1040.91   8
   3  -6   2 3655.30 455.012   8
   3  -6   3 8207.58 719.213   8
   3  -6   4 10264.5 859.445   8
   3  -6   5 563.398 127.295  20
   3  -6   5 796.507 153.149  29
   3  -6   5 655.035 141.149  18
   3  -6   5 588.924 276.172   8
   3  -6   6 1596.69 182.679  20
   3  -6   6 1747.77 205.828  18
   3  -6   6 1628.87 204.032  29
   3  -6   7 340.743 95.9290  20
   3  -6   7 385.930 118.378  18
   3  -6   7 373.296 125.425  29
   3  -6   8 497.986 110.885  29
   3  -5  -9 7835.06 351.238  27
   3  -5  -9 7813.41 331.152  23
   3  -5  -8 576.614 126.828  27
   3  -5  -7 2765.75 211.944  28
   3  -5  -7 2948.54 228.868  27
   3  -5  -6 4321.86 472.267   6
   3  -5  -6 4833.93 260.280  28
   3  -5  -6 4784.99 270.915  27
   3  -5  -6 4431.81 280.600  21
   3  -5  -5 14576.0 830.862   6
   3  -5  -4 2788.22 331.824   6
   3  -5  -4 2614.44 368.616   7
   3  -5  -3 25264.3 1003.93   6
   3  -5  -3 25349.4 1139.59   7
   3  -5  -2 22896.3 917.993   6
   3  -5  -1 11804.4 685.344   8
   3  -5  -1 10659.7 617.319   6
   3  -5   0 41874.0 1471.77   8
   3  -5   1 133969. 3484.09   8
   3  -5   2 21427.8 1085.61   8
   3  -5   3 30238.0 1418.89   8
   3  -5   4 38995.2 1766.17   8
   3  -5   5 33378.8 974.399  20
   3  -5   5 33278.3 1026.39  18
   3  -5   5 30768.9 1662.11   8
   3  -5   5 34962.2 1014.27  29
   3  -5   6 2039.94 198.664  20
   3  -5   6 2149.32 220.742  18
   3  -5   6 2133.20 221.671  29
   3  -5   7 10190.3 472.196  18
   3  -5   7 10662.8 480.016  29
   3  -5   8 1465.44 152.326  18
   3  -5   8 1537.90 169.372  29
   3  -4 -10 4449.40 203.385  23
   3  -4  -9 134.059 96.9984  27
   3  -4  -9 71.6563 88.6115  23
   3  -4  -8 5655.49 313.433  27
   3  -4  -8 4752.03 298.949  23
   3  -4  -7 42663.3 1108.60  28
   3  -4  -7 45637.9 1159.43  27
   3  -4  -7 42115.0 1172.56  21
   3  -4  -7 40452.3 1658.47   6
   3  -4  -6 1683.43 303.477   6
   3  -4  -5 1340.70 243.159   6
   3  -4  -5 1201.60 266.637   7
   3  -4  -4 7321.39 499.896   6
   3  -4  -4 6795.96 556.863   7
   3  -4  -3 8831.26 510.433   6
   3  -4  -3 9112.81 610.091   7
   3  -4  -2 1136.92 232.084   7
   3  -4  -2 1129.32 184.186   6
   3  -4  -1 142674. 3393.62   8
   3  -4  -1 134373. 3212.96   6
   3  -4   0 8926.89 579.717   8
   3  -4   1 27773.4 1143.67   8
   3  -4   2 18862.9 976.831   8
   3  -4   3 1151.86 298.158   8
   3  -4   4 12629.9 931.637   8
  -3  -4  -4 11553.1 702.843   6
   3  -4   5 27735.2 1541.81   8
   3  -4   5 26957.0 876.193  18
  -3  -4  -5 25547.8 1209.27   6
   3  -4   5 28456.6 866.275  29
   3  -4   6 69.2895 92.3752  18
   3  -4   6 181.895 118.558  29
   3  -4   7 809.740 151.792  18
   3  -4   7 1234.68 182.218  29
   3  -4   8 5520.13 310.629  18
   3  -4   8 5659.66 318.100  29
   3  -3 -10 1404.09 122.069  23
   3  -3  -9 1370.56 155.877  23
   3  -3  -9 1331.15 164.474  27
   3  -3  -8 7261.56 366.148  27
   3  -3  -8 6904.11 353.706  23
   3  -3  -8 6304.68 351.445  21
   3  -3  -7 42265.0 1105.28  27
   3  -3  -7 38884.5 1118.69  21
   3  -3  -6 379.478 166.185   6
   3  -3  -5 20400.2 907.667   6
   3  -3  -5 20111.7 1030.03   7
   3  -3  -4 18488.3 787.025   6
   3  -3  -4 18727.8 926.077   7
   3  -3  -3 162198. 3651.63   6
   3  -3  -3 160914. 3911.32   7
   3  -3  -2 133509. 3089.19   6
   3  -3  -2 145738. 3404.28   7
  -3  -3   1 9375.99 936.703   3
   3  -3  -1 8161.97 503.347   8
  -3  -3   1 7346.55 750.576   4
   3  -3  -1 7406.08 405.825   6
  -3  -3   1 7526.27 734.044   1
   3  -3   0 39015.1 1298.81   8
  -3  -3   0 41856.7 2009.06   3
   3  -3   1 217883. 5019.19   8
   3  -3   2 32400.6 1306.43   8
  -3  -3  -3 97199.6 2515.17   6
   3  -3   3 106179. 2993.06   8
  -3  -3  -4 4844.86 436.768   6
  -3  -3  -5 24967.3 1165.02   6
   3  -3   6 21052.7 739.677  29
   3  -3   7 8874.25 460.301  18
   3  -3   7 9176.15 446.842  29
   3  -3   8 57.8369 88.4108  18
   3  -3   8 89.2089 97.1395  29
   3  -3   9 1257.78 124.479  18
   3  -3   9 1332.64 132.169  29
   3  -2 -10 2013.38 148.322  23
   3  -2  -9 114.804 97.0178  23
   3  -2  -9 47.1527 83.3192  21
   3  -2  -8 25579.3 832.442  21
   3  -2  -8 27461.6 834.761  27
   3  -2  -8 27018.0 802.518  23
   3  -2  -7 22712.2 706.102  27
   3  -2  -7 21120.6 725.651  21
   3  -2  -6 11591.0 725.305   6
   3  -2  -5 12995.9 797.125   7
   3  -2  -5 13018.0 678.820   6
   3  -2  -4 39327.8 1230.70   6
   3  -2  -4 42310.4 1464.17   7
   3  -2  -3 157193. 3536.98   6
   3  -2  -3 166507. 3851.45   7
   3  -2  -2 28387.5 838.074   6
   3  -2  -2 30601.9 1066.24   7
  -3  -2   2 31250.5 1775.74   3
  -3  -2   1 98068.5 3308.34   1
  -3  -2   1 105357. 3345.90   3
   3  -2  -1 99332.1 2424.75   8
  -3  -2   1 89481.0 3030.16   4
   3  -2  -1 90736.4 2156.44   6
   3  -2  -1 103265. 2437.65   7
  -3  -2   0 7889.54 842.925   4
  -3  -2   0 9429.91 798.065   3
   3  -2   0 9253.83 530.206   8
  -3  -2  -1 8719.56 798.608   3
   3  -2   1 8837.41 547.966   8
   3  -2   2 2484.67 337.708   8
  -3  -2  -3 64755.6 1788.24   6
  -3  -2  -4 59909.1 1842.90   6
  -3  -2  -5 7445.99 603.823   6
   3  -2   6 17591.3 769.298  14
   3  -2   6 19292.8 687.890  29
   3  -2   7 622.934 145.822  29
   3  -2   8 12696.8 517.878  18
   3  -2   8 11347.2 486.912  29
   3  -2   9 4399.26 238.877  18
   3  -2   9 4212.95 232.352  29
   3  -1 -10 3869.17 208.964  21
   3  -1  -9 2888.19 212.233  23
   3  -1  -9 2268.90 207.763  21
  -3  -1   9 2756.41 205.085  29
   3  -1  -8 10338.7 455.195  27
   3  -1  -8 10009.6 428.029  23
   3  -1  -8 10157.1 469.891  21
   3  -1  -7 9610.22 405.582  23
   3  -1  -7 9306.41 416.362  27
   3  -1  -7 9096.38 441.569  21
   3  -1  -6 45350.0 1723.03   7
   3  -1  -5 5261.85 503.072   7
   3  -1  -4 3869.17 424.576   7
   3  -1  -3 16230.7 769.068   7
  -3  -1   2 35659.9 1371.89   4
   3  -1  -2 45233.9 1320.75   7
   3  -1  -1 1382.42 190.314   8
  -3  -1   1 1638.54 326.113   3
  -3  -1   1 1227.50 358.427   1
   3  -1  -1 1473.71 206.397   7
   3  -1   0 61569.7 1676.85   8
   3  -1   0 58296.0 1597.09   7
   3  -1   1 17050.5 763.046   8
   3  -1   2 60917.6 1745.90   5
  -3  -1  -2 53875.8 1468.80   6
  -3  -1  -3 46934.8 1418.16   6
   3  -1   3 47799.4 1654.56   5
   3  -1   4 80027.9 2550.72   5
   3  -1   5 5565.92 632.396   5
   3  -1   6 98.2681 95.8810  29
   3  -1   6 45.2107 122.338  14
   3  -1   7 4265.88 376.001  14
   3  -1   7 5099.24 327.574  29
   3  -1   8 120.899 105.306  29
   3  -1   9 1562.20 154.276  18
   3  -1   9 1515.11 145.755  29
  -3   0  10 5840.53 260.549  29
  -3   0   9 194.699 90.8787  29
   3   0  -9 242.176 100.483  23
   3   0  -9 108.188 95.8274  21
  -3   0   8 13375.9 534.865  29
   3   0  -8 13147.8 511.168  23
   3   0  -8 13310.7 557.314  21
   3   0  -7 122.126 87.7770  23
  -3   0   7 184.154 87.8690  29
   3   0  -7 316.338 104.779  27
   3   0  -7 304.272 107.999  21
   3   0  -6-13.2423 155.815   7
   3   0  -5 2232.69 327.175   7
   3   0  -4 3348.99 374.312   7
   3   0  -3 56477.3 1536.24  10
   3   0  -3 60884.0 1755.02   7
   3   0  -2 86746.9 2171.86  10
   3   0  -2 93378.9 2291.39   7
   3   0  -1 137.075 143.044  10
   3   0  -1 261.702 108.867   8
   3   0  -1 127.562 111.450   7
  -3   0   1 379.714 282.936   1
  -3   0   1 18.4709 118.766   3
   3   0   0 1488.04 194.224   8
  -3   0   0 1611.46 225.763   3
   3   0   0 1229.64 172.948   7
   3   0   1 174576. 3929.65   5
   3   0   1 174489. 4361.75   3
   3   0   1 179124. 4016.09   8
   3   0   2 119226. 2960.71   5
   3   0   3 69833.8 2113.68   5
   3   0   4 49469.6 1837.08   5
   3   0   5 7564.27 731.068   5
   3   0   6-38.6694 99.5516  29
   3   0   6-2.32220 213.200   5
   3   0   6 28.3144 117.239  14
   3   0   7 847.596 147.442  29
   3   0   7 977.731 199.328  14
   3   0   8 1809.66 244.198  14
   3   0   8 1863.83 193.326  29
   3   0   9 2070.45 179.182  18
   3   0   9 1762.11 156.545  29
  -3   1  10 4188.30 223.947  29
  -3   1   9 3038.84 227.365  29
   3   1  -9 2865.96 216.237  23
   3   1  -9 2762.46 233.699  21
  -3   1   8 10082.3 461.268  29
   3   1  -8 9789.68 423.912  23
   3   1  -8 9914.34 472.507  21
  -3   1   7 9678.74 442.926  29
   3   1  -7 8949.19 415.977  27
   3   1  -7 9577.49 404.703  23
   3   1  -7 9688.76 449.862  21
   3   1  -6 47356.8 1795.67   7
   3   1  -5 5362.64 512.384   7
   3   1  -4 4133.17 439.952   7
   3   1  -3 17245.7 785.416   7
   3   1  -3 17234.2 1365.50   1
   3   1  -2 37807.1 1195.56  10
   3   1  -2 42897.1 1288.32   7
  -3   1   1 1470.89 154.923  11
   3   1  -1 1419.54 209.532  10
   3   1  -1 1209.13 148.354   8
  -3   1   1 1124.19 189.085   3
   3   1  -1 1519.74 194.190   7
  -3   1   1 1700.17 434.936   1
   3   1   0 64866.3 1699.81  10
   3   1   0 61948.1 1541.74   7
   3   1   1 17196.3 1058.53   3
   3   1   1 17016.8 699.145   8
   3   1   1 16774.8 659.028   5
   3   1   2 59521.6 1697.72   5
   3   1   2 55173.2 2321.81   3
  -3   1  -3 50639.1 1521.59  11
   3   1   3 49488.4 1654.98   5
  -3   1  -4 77452.4 2179.32  11
   3   1   4 79112.4 2466.97   5
   3   1   5 5726.33 629.839   5
   3   1   6-43.4000 103.725  29
   3   1   6 150.050 115.796  14
   3   1   6 50.6643 220.270   5
   3   1   7 5216.34 387.677  14
   3   1   7 4701.76 311.162  29
   3   1   8 216.493 108.348  29
   3   1   8-3.94573 148.456  14
   3   1   9 1489.14 158.299  18
   3   1   9 1514.39 138.505  29
  -3   2  10 1926.86 153.827  29
  -3   2   9 136.285 97.4880  29
   3   2  -9-2.09271 102.514  21
  -3   2   8 26314.2 852.673  29
   3   2  -8 26513.3 806.025  23
   3   2  -8 27591.6 874.784  21
   3   2  -7 20377.8 1189.03   7
  -3   2   7 21748.4 747.806  29
   3   2  -7 22418.6 704.241  23
   3   2  -7 22798.9 763.664  21
   3   2  -6 12311.6 851.670   7
   3   2  -5 13953.6 850.921   7
   3   2  -4 41593.4 1496.27   7
   3   2  -3 175871. 3996.24   7
  -3   2   3 164156. 3767.48   5
   3   2  -2 30545.6 1033.30   7
  -3   2   2 27406.5 821.535  11
  -3   2   1 107198. 3818.28   1
   3   2  -1 103092. 2467.01  10
   3   2  -1 100633. 2390.78   7
   3   2   0 8309.56 497.639  10
  -3   2   0 9558.42 1025.15   1
   3   2   0 8985.93 409.751   7
  -3   2   0 8632.33 432.988  11
  -3   2  -1 8220.88 448.074  11
   3   2   1 8378.13 814.118   3
   3   2   1 8255.39 428.766   5
   3   2   1 7760.74 421.524   8
   3   2   1 7949.76 506.864  10
  -3   2  -2 2530.29 267.387  11
   3   2   2 1940.06 246.680   5
   3   2   3 66851.5 2064.87   5
  -3   2  -3 70127.9 1938.68  11
   3   2   4 61502.2 2092.05   5
  -3   2  -4 61216.3 1853.27  11
   3   2   5 8425.67 760.274   5
   3   2   6 19762.8 752.323  14
   3   2   6 18970.2 1255.19   5
   3   2   7 598.213 139.295  29
   3   2   7 749.413 187.641  14
   3   2   8 11186.0 456.111  29
   3   2   8 12470.7 581.658  14
   3   2   9 3547.26 193.060  29
  -3   3  10 1277.87 130.010  29
   3   3  -9 1115.56 163.442  21
  -3   3   9 1303.86 163.201  29
  -3   3   8 7212.40 391.911  29
   3   3  -8 6974.60 389.500  21
   3   3  -7 42930.0 1180.33  21
  -3   3   7 41027.5 1177.75  29
   3   3  -7 41536.2 1118.34  23
   3   3  -6 97.6010 184.442   7
   3   3  -5 23171.5 1171.65   7
  -3   3   4 19703.3 875.915   5
   3   3  -4 20775.5 988.131   7
   3   3  -3 168324. 4004.69   7
  -3   3   3 165811. 3865.89   5
  -3   3   2 144009. 4684.89   2
   3   3  -2 144373. 3331.70   7
  -3   3   2 134928. 3099.16  11
   3   3  -1 8315.68 452.233   7
  -3   3   1 8111.15 433.075  11
   3   3   0 38430.6 1219.32  10
  -3   3   0 36918.3 1109.93  11
   3   3   1 202605. 4633.13  10
   3   3   1 198803. 4448.81   5
  -3   3  -1 212326. 4548.17  11
   3   3   2 31009.6 1127.60   5
  -3   3  -2 32147.5 1115.37  11
   3   3   3 97777.5 2734.81   5
  -3   3  -3 100879. 2622.91  11
   3   3   4 4353.46 495.743   5
  -3   3  -4 4358.39 412.399  11
   3   3   5 26153.2 1376.07   5
   3   3   6 21190.8 791.302  14
   3   3   6 20503.8 1294.97   5
   3   3   7 9527.53 512.456  14
   3   3   8 197.021 145.148  14
   3   3   9 1159.86 158.311  14
  -3   4  10 4759.12 232.529  29
  -3   4   9 202.865 100.304  29
  -3   4   8 5388.22 341.335  29
   3   4  -8 5142.95 337.602  21
   3   4  -7 43711.5 1205.04  21
  -3   4   7 41918.7 1203.41  29
   3   4  -6 1900.42 371.493   7
   3   4  -5 1361.69 304.431   7
  -3   4   5 974.335 250.682   5
  -3   4   4 7409.43 553.257   5
   3   4  -4 7410.41 606.342   7
   3   4  -3 9113.29 604.787   7
  -3   4   3 8377.99 548.562   5
  -3   4   2 1068.38 172.178  11
   3   4  -2 1199.06 217.508   7
   3   4  -1 138550. 3276.92   7
  -3   4   1 141629. 3257.14  11
  -3   4   0 8537.94 500.381  11
   3   4   1 26790.2 1050.29  10
  -3   4  -1 27784.7 1019.33  11
   3   4   2 17950.0 826.931   5
  -3   4  -2 18889.5 844.017  11
  -3   4  -3 1209.62 234.477  11
   3   4   3 880.279 221.732   5
   3   4   4 12238.2 843.350   5
  -3   4  -4 11854.0 738.205  11
   3   4   5 27215.8 876.131  14
   3   4   5 27533.7 843.570  16
   3   4   5 27384.3 1433.39   5
   3   4   6 69.9150 111.078  14
   3   4   6 25.5596 191.983   5
   3   4   7 1200.09 210.958  14
   3   4   8 5737.61 366.982  14
  -3   5   9 7735.24 369.152  29
  -3   5   8 561.504 145.692  29
   3   5  -8 456.180 127.162  21
  -3   5   7 2695.10 248.124  29
   3   5  -7 2718.49 240.496  21
  -3   5   6 4600.15 304.246  29
   3   5  -6 4631.73 295.582  21
  -3   5   5 15357.0 924.502   5
   3   5  -5 15442.2 986.276   7
   3   5  -4 3410.29 430.096   7
  -3   5   4 2986.95 391.286   5
   3   5  -3 27227.6 1169.39   7
  -3   5   3 26704.3 1141.67   5
   3   5  -2 24410.7 1013.90   7
  -3   5   2 23394.5 913.741  11
   3   5  -1 11598.4 609.729   7
  -3   5   1 11513.7 607.945  11
  -3   5   0 39373.4 1319.52  11
   3   5   1 130346. 3291.43  10
  -3   5  -1 132818. 3274.18  11
   3   5   2 20477.1 929.594   5
   3   5   2 20374.9 923.595  10
  -3   5  -2 21273.1 960.020  11
   3   5   3 27112.2 1223.25   5
  -3   5  -3 28263.8 1182.98  11
  -3   5  -4 37164.7 1468.96  11
   3   5   4 37166.9 1611.99   5
   3   5   5 34419.6 1013.78  14
   3   5   5 33019.3 982.627  16
   3   5   5 32773.9 1614.67   5
   3   5   6 2124.17 232.121  14
   3   5   7 10466.2 528.532  14
   3   5   8 1663.56 202.772  14
  -3   6   9 1851.74 178.560  29
  -3   6   8 8062.81 413.763  29
   3   6  -7 3668.16 283.079  21
  -3   6   7 4765.59 321.926  29
  -3   6   6 14633.3 976.118   5
  -3   6   6 14780.1 589.243  29
   3   6  -6 13974.8 560.780  21
  -3   6   5 3057.81 438.173   5
  -3   6   4 8209.35 674.598   5
  -3   6   3 39560.8 1537.61   5
  -3   6   2 40162.6 1376.71  11
  -3   6   1 35870.7 1287.95  11
  -3   6   0 22507.5 984.344  11
   3   6   1 19319.2 930.227  10
  -3   6  -1 19540.1 940.034  11
  -3   6  -2 3586.90 400.658  11
   3   6   3 7345.10 625.324   5
  -3   6  -3 8100.01 626.850  11
  -3   6  -4 10085.3 728.925  11
   3   6   4 10029.5 805.856   5
   3   6   5 444.572 129.692  16
   3   6   5 634.129 144.996  14
   3   6   6 1500.09 209.182  14
   3   6   6 1555.89 193.751  16
   3   6   7 274.791 141.616  14
   3   6   8 539.404 105.829  26
   3   6   8 469.543 138.087  14
  -3   7   9 2191.24 181.300  29
  -3   7   8 3234.03 259.185  29
  -3   7   7 15392.6 616.401  29
  -3   7   6 3455.23 273.602  29
   3   7  -6 3386.29 256.138  21
  -3   7   6 3207.93 477.309   5
  -3   7   5 24096.4 1314.57   5
  -3   7   5 23695.2 784.323  29
  -3   7   4 538.790 226.616   5
  -3   7   3 12063.1 840.791   5
  -3   7   2 44800.5 1576.21  11
  -3   7   1 9816.06 658.436  11
  -3   7   0 24703.5 1115.97  11
   3   7   1 27098.3 1191.53  10
  -3   7  -1 28089.4 1219.20  11
  -3   7  -2 13716.5 838.403  11
   3   7   3 3246.60 430.214   5
  -3   7  -3 3954.60 463.698  11
  -3   7  -4 10332.0 777.972  11
   3   7   4 11454.7 483.610  16
   3   7   4 9656.46 808.431   5
   3   7   5 17211.5 651.098  14
   3   7   5 17039.3 642.226  16
   3   7   6 11388.2 526.715  14
   3   7   6 11648.6 503.410  16
   3   7   7 2306.74 235.198  14
   3   7   8 2714.56 218.615  14
   3   7   8 2968.06 196.802  26
  -3   8   9 301.548 83.3843  29
  -3   8   8 3098.04 232.819  29
  -3   8   7 1601.47 197.780  29
  -3   8   6 956.041 154.461  29
  -3   8   5 3793.18 520.259   5
  -3   8   5 3858.93 285.658  29
  -3   8   4 1728.07 373.257   5
  -3   8   4 1491.74 176.640  29
  -3   8   3 5132.90 599.867   5
  -3   8   2 1461.74 296.599  11
  -3   8   1 9697.52 700.396  11
  -3   8   0 20644.6 1063.42  11
  -3   8  -1 1290.85 289.462  11
   3   8   1 1652.44 303.153  10
  -3   8  -2 9728.71 743.798  11
   3   8   3 3282.17 253.578  22
  -3   8  -3 3446.08 466.794  11
   3   8   4 15399.2 595.332  16
  -3   8  -4 14063.2 937.565  11
   3   8   5 3762.31 288.811  16
   3   8   5 3525.98 281.279  14
   3   8   6 133.543 109.896  16
   3   8   6 173.344 117.415  14
   3   8   7 4937.78 303.466  14
  -3   9   8 1331.46 151.476  29
  -3   9   7 2117.91 207.698  29
  -3   9   6 1702.08 200.627  29
  -3   9   5 1728.66 207.118  29
  -3   9   5 1820.60 187.245  22
  -3   9   4 1227.65 325.211   5
  -3   9   4 1182.76 171.089  29
  -3   9   3 26345.1 1418.85   5
  -3   9   3 24922.5 803.325  24
   3   9  -3 24515.9 735.402  12
  -3   9   2 2238.82 361.487  11
  -3   9   1 22739.5 1198.25  11
  -3   9   0 34522.5 1522.29  11
  -3   9  -1 10976.3 823.377  11
  -3   9  -2 12150.7 488.409  24
   3   9   2 10788.1 477.741  22
  -3   9  -2 12129.5 883.358  11
   3   9   3 4183.83 295.009  22
  -3   9  -3 4081.26 518.041  11
   3   9   4 13379.6 554.843  16
   3   9   5 7214.53 387.217  16
   3   9   5 6391.25 371.120  14
   3   9   6 8094.60 409.554  14
   3   9   6 8470.02 394.614  16
   3   9   7 909.354 133.576  14
  -3  10   8 101.964 64.2580  29
  -3  10   7 1200.69 154.457  29
  -3  10   6 4926.63 312.474  29
  -3  10   6 4860.48 279.636  22
  -3  10   5 2496.48 218.443  22
  -3  10   5 2703.36 242.358  29
  -3  10   4 1219.85 356.544   5
  -3  10   4 1583.34 200.949  29
   3  10  -3 22697.7 706.104  12
  -3  10   3 23335.0 795.849  24
  -3  10   3 25264.8 1431.14   5
   3  10  -2 7227.33 351.280  12
  -3  10   2 6886.30 378.805  24
  -3  10   1 36138.2 1053.92  24
  -3  10   1 36202.3 1610.96  11
  -3  10   0 12635.5 521.292  24
  -3  10   0 12978.3 929.790  11
   3  10   1 41650.6 1137.02  19
  -3  10  -1 42116.0 1162.02  24
  -3  10  -1 41541.2 1797.59  11
   3  10   2 24129.4 799.622  22
  -3  10  -2 25753.7 1369.21  11
  -3  10  -2 26208.2 812.702  24
   3  10   3 11745.8 513.896  22
   3  10   4 4753.76 325.307  16
   3  10   5 3541.20 264.698  16
   3  10   5 3247.94 249.289  14
   3  10   6 747.617 129.990  16
   3  10   6 551.299 114.798  14
  -3  11   7 4210.97 236.286  29
  -3  11   7 4490.53 222.760  14
  -3  11   6 5321.57 300.115  29
  -3  11   6 5499.00 283.124  22
  -3  11   5 33359.2 983.192  29
  -3  11   5 35014.5 977.744  22
  -3  11   4 37.9423 94.7805  29
  -3  11   3 7050.70 405.530  24
  -3  11   3 7229.70 385.529  29
  -3  11   2 13729.4 1044.55   5
  -3  11   2 12510.0 550.768  24
  -3  11   1 9284.14 458.520  24
  -3  11   1 8340.92 760.599  11
   3  11   0 32278.0 932.180  19
  -3  11   0 30526.9 931.645  19
  -3  11   0 31544.9 959.711  24
  -3  11   0 30696.5 1532.68  11
   3  11   1 51632.4 1357.59  19
  -3  11  -1 51622.1 2089.10  11
  -3  11  -1 52343.9 1379.60  24
  -3  11  -2 2888.28 234.189  24
   3  11   2 2667.81 226.994  22
   3  11   3 677.879 145.016  22
   3  11   4 1369.83 190.136  16
   3  11   4 1161.12 151.865  14
   3  11   5 1163.45 162.841  16
   3  11   5 1265.88 149.757  14
   3  11   6 9919.16 382.983  14
   3  11   6 10566.9 384.424  16
  -3  12   6 3833.36 225.023  29
  -3  12   6 3967.58 216.042  22
  -3  12   5 2926.77 218.894  29
  -3  12   5 3012.15 222.455  22
  -3  12   4 4642.37 290.856  29
  -3  12   4 5098.04 311.832  22
  -3  12   3 6585.83 352.534  29
  -3  12   2 9694.94 478.004  24
  -3  12   1 34463.8 982.226  19
   3  12  -1 34874.0 989.108  19
  -3  12   1 35063.0 1034.16  24
   3  12   0 3002.80 234.101  19
  -3  12   0 3123.50 236.777  19
  -3  12   0 2892.80 253.565  24
  -3  12  -1 710.031 130.379  19
  -3  12  -1 745.683 142.351  24
  -3  12  -2 4307.29 273.886  24
   3  12   2 3848.79 260.342  22
   3  12   3 3630.70 264.036  16
   3  12   4 1220.34 171.478  16
   3  12   5 6885.20 302.087  14
   3  12   5 7731.33 329.911  16
  -3  13   5 5955.32 277.216  29
  -3  13   5 6364.39 294.505  22
  -3  13   4 2223.59 184.541  29
  -3  13   4 2560.87 207.732  22
  -3  13   3 12392.9 478.855  29
  -3  13   2 6763.74 332.481  19
  -3  13   2 6902.16 343.679  29
  -3  13   1 11541.9 453.278  19
   3  13  -1 11021.5 448.867  19
  -3  13   1 11564.4 491.637  24
  -3  13   0 1325.72 156.979  19
   3  13   0 974.092 142.347  19
  -3  13   0 1385.82 171.370  24
  -3  13  -1 19496.0 653.315  19
  -3  13  -1 19857.8 659.753  24
  -3  13  -2 9004.12 401.854  19
   3  13   3 4713.37 276.633  16
   3  13   4 33.6650 82.4941  16
  -3  14   4 429.922 83.1843  29
  -3  14   4 450.523 97.9859  22
  -3  14   3 3607.09 209.705  29
  -3  14   3 4095.77 243.571  22
  -3  14   2 7451.40 324.121  29
  -3  14   1 4291.63 238.243  19
   3  14  -1 4394.31 240.139  19
  -3  14   1 4170.05 238.476  29
  -3  14   0 8954.31 364.536  19
  -3  14  -1 12471.2 442.261  19
  -3  14  -1 11769.7 436.816  24
  -3  14  -2 7620.78 327.020  19
   3  14   2 8344.78 347.082  16
  -3  14  -3 3071.06 185.139  19
   3  14   3 3476.01 207.575  16
  -3  15   3 7983.63 306.349  22
  -3  15   2 1364.99 133.864  22
  -3  15   1 2704.43 180.543  22
  -3  15   0 1275.26 113.586  19
  -3  15  -1 2277.04 144.817  19
   3  15   1 2299.81 151.517  16
  -3  15  -2 286.837 61.9919  19
   3  15   2 271.318 73.0498  16
   4 -14  -4 4926.27 190.992  28
   4 -14  -4 5491.32 224.190  27
   4 -14  -3 9257.58 329.864  27
   4 -14  -2 2338.22 161.875  27
   4 -14  -1 1805.35 143.724  27
   4 -14   0 8884.33 323.931  27
   4 -14   0 8516.81 335.289  20
   4 -14   1 13257.6 429.072  27
   4 -14   1 15336.5 468.787  20
   4 -14   2 169.524 69.1440  20
   4 -14   2 67.1546 51.1823  27
   4 -13  -5 383.826 70.8633  28
   4 -13  -5 305.913 76.4079  27
   4 -13  -4 4345.64 207.346  28
   4 -13  -4 4707.71 236.569  27
   4 -13  -3 8519.15 343.617  27
   4 -13  -2 16109.5 524.340  27
   4 -13  -1 7868.42 334.174  27
   4 -13  -1 7231.36 341.766  20
   4 -13   0 1490.79 147.428  27
   4 -13   0 1886.17 168.834  20
   4 -13   1 8965.37 375.572  15
   4 -13   1 8569.16 365.673  20
   4 -13   2 42192.7 1059.77  15
   4 -13   2 42632.2 1071.96  20
   4 -13   3 160.573 82.8117  20
   4 -13   3 179.798 70.0334  15
   4 -12  -6 3648.04 183.241  28
   4 -12  -6 3612.34 196.331  27
   4 -12  -5 10241.4 385.944  27
   4 -12  -5 10131.8 356.510  28
   4 -12  -4 6381.91 307.464  27
   4 -12  -3 298.241 99.0385  27
   4 -12  -2 12209.4 460.524  27
   4 -12  -2 11102.5 463.580  20
   4 -12  -1 2051.09 181.122  27
   4 -12  -1 2057.54 194.073  20
   4 -12   0 15083.0 547.175  15
   4 -12   0 13836.6 526.960  20
   4 -12   1 950.486 145.915  20
   4 -12   1 885.527 134.303  15
   4 -12   2 643.572 127.188  20
   4 -12   2 654.430 119.571  15
   4 -12   3 7393.19 320.006  15
   4 -12   3 7247.36 341.964  20
   4 -12   4 917.149 118.704  20
   4 -12   4 733.062 94.1237  15
   4 -11  -7 1909.99 129.766  28
   4 -11  -7 1909.44 143.502  27
   4 -11  -6 1562.05 142.179  28
   4 -11  -6 1575.72 150.740  27
   4 -11  -5 3689.95 219.856  28
   4 -11  -5 3726.37 241.113  27
   4 -11  -4 1069.52 145.354  27
   4 -11  -3 6837.37 335.805  27
   4 -11  -3 6082.69 334.177  20
   4 -11  -2 24854.1 745.513  27
   4 -11  -2 23992.6 768.894  20
   4 -11  -1 1872.43 176.837  27
   4 -11  -1 1863.80 191.424  20
   4 -11   0 31664.3 908.037  15
   4 -11   0 29514.0 896.913  20
   4 -11   1 20071.8 673.958  15
   4 -11   1 19965.5 675.910  20
   4 -11   2 2561.44 212.115  15
   4 -11   2 2820.15 227.786  20
   4 -11   3 2258.61 206.790  20
   4 -11   3 1789.98 171.811  15
   4 -11   4 18471.4 607.855  20
   4 -11   5 1358.49 141.565  20
   4 -10  -7 3543.05 197.144  28
   4 -10  -7 3607.61 212.739  27
   4 -10  -6 8122.01 336.981  28
   4 -10  -6 8174.47 360.908  27
   4 -10  -5 9291.09 379.431  28
   4 -10  -5 9309.13 402.764  27
   4 -10  -4 9893.19 411.042  27
   4 -10  -4 8764.03 412.991  20
   4 -10  -3 21618.5 1166.90   6
   4 -10  -3 20413.6 652.711  27
   4 -10  -3 18887.3 672.287  20
   4 -10  -2 10311.5 428.621  27
   4 -10  -2 11127.1 824.718   6
   4 -10  -2 10834.9 912.348   7
   4 -10  -2 10003.5 449.546  20
   4 -10  -1 5331.32 575.646   6
   4 -10  -1 5435.49 308.280  15
   4 -10  -1 4921.81 299.674  20
   4 -10   0 11336.9 875.990   6
   4 -10   0 11544.2 472.669  15
   4 -10   0 11035.0 466.332  20
   4 -10   1 4404.81 281.269  15
   4 -10   1 3823.02 535.789   6
   4 -10   1 4306.25 278.406  20
   4 -10   2 13114.3 524.390  20
   4 -10   2 11534.5 562.533  18
   4 -10   2 12893.5 501.412  15
   4 -10   3 267.146 116.262  20
   4 -10   3 184.488 104.243  18
   4 -10   3 367.582 98.3044  15
   4 -10   4 2283.78 209.539  20
   4 -10   4 1943.59 210.865  18
   4 -10   5 2496.52 193.554  20
   4 -10   5 1854.71 180.495  18
   4 -10   6 2280.55 155.452  20
   4  -9  -8 169.291 73.4217  27
   4  -9  -7 1103.62 129.156  28
   4  -9  -7 965.292 136.002  27
   4  -9  -6 2936.88 212.592  28
   4  -9  -6 2725.90 213.362  27
   4  -9  -5 4661.71 266.484  28
   4  -9  -5 4791.52 281.980  27
   4  -9  -4 35977.7 1535.08   6
   4  -9  -4 36798.8 974.359  27
   4  -9  -4 32490.6 996.789  20
   4  -9  -3 1694.93 168.399  27
   4  -9  -3 1861.66 345.149   6
   4  -9  -3 2048.36 400.784   7
   4  -9  -3 2022.13 202.732  20
   4  -9  -2 2747.33 203.738  27
   4  -9  -2 2213.25 365.914   6
   4  -9  -2 2548.88 448.172   7
   4  -9  -2 2504.95 206.124  20
   4  -9  -1 17710.8 1028.85   6
   4  -9  -1 16337.2 575.264  15
   4  -9  -1 16101.0 575.094  20
   4  -9   0 12207.4 472.012  15
   4  -9   0 11625.8 870.051   6
   4  -9   0 11301.2 502.987  26
   4  -9   0 11993.2 476.516  20
   4  -9   1 7743.11 380.405  20
   4  -9   1 6825.69 436.211  18
   4  -9   1 8034.23 720.044   8
   4  -9   1 8227.23 376.082  15
   4  -9   1 7294.71 700.209   6
   4  -9   2 4784.89 306.402  20
   4  -9   2 4072.04 325.812  18
   4  -9   2 4621.79 558.738   8
   4  -9   2 4951.07 291.977  15
   4  -9   3 15789.6 591.733  20
   4  -9   3 14084.0 627.963  18
   4  -9   4 17315.1 631.605  20
   4  -9   4 16148.7 666.222  18
   4  -9   4 17584.5 649.500  29
   4  -9   5 5293.70 298.178  20
   4  -9   5 4980.53 319.546  18
   4  -9   5 4978.02 311.189  29
   4  -9   6 1769.15 153.947  20
   4  -9   6 1520.37 156.355  18
   4  -8  -8 1068.26 131.603  27
   4  -8  -7 1608.88 163.554  28
   4  -8  -7 1697.97 169.825  27
   4  -8  -6 5602.60 292.072  28
   4  -8  -6 5403.77 306.646  27
   4  -8  -5 23252.4 701.580  28
   4  -8  -5 24251.6 738.717  27
   4  -8  -4 2977.26 218.004  27
   4  -8  -4 2589.27 230.938  20
   4  -8  -3 19798.4 1055.30   6
   4  -8  -3 19336.5 612.300  27
   4  -8  -3 18361.5 1155.96   7
   4  -8  -3 18892.7 653.502  20
   4  -8  -2 18949.0 1013.15   6
   4  -8  -2 18523.4 1150.40   7
   4  -8  -1 30439.1 1355.20   6
   4  -8   0 10892.2 812.051   8
   4  -8   0 10823.4 806.898   6
   4  -8   1 13863.0 947.689   8
   4  -8   1 12494.8 914.249   6
   4  -8   2 11295.4 468.436  20
   4  -8   2 10188.7 516.365  18
   4  -8   2 10925.0 868.878   8
   4  -8   3 3903.17 273.466  20
   4  -8   3 3806.27 300.811  18
   4  -8   3 3861.83 282.591  29
   4  -8   3 3209.42 489.915   8
   4  -8   4 6138.41 350.091  20
   4  -8   4 5867.31 379.827  18
   4  -8   4 6085.71 366.470  29
   4  -8   5 6703.07 346.556  20
   4  -8   5 7227.30 387.003  29
   4  -8   5 6219.16 373.557  18
   4  -8   6 10809.4 411.694  20
   4  -8   6 10063.3 446.417  18
   4  -8   6 10564.1 451.778  29
   4  -8   7 922.744 118.826  29
   4  -7  -9 18.1579 62.1733  27
   4  -7  -9 139.562 71.5740  23
   4  -7  -8 3443.13 228.602  27
   4  -7  -7 1355.54 166.041  27
   4  -7  -7 1502.35 164.992  28
   4  -7  -6 9232.39 390.008  28
   4  -7  -6 9251.69 407.102  27
   4  -7  -6 9032.55 428.948  21
   4  -7  -5 2265.60 180.334  28
   4  -7  -5 2181.81 194.583  27
   4  -7  -4 16440.9 546.377  27
   4  -7  -4 16784.4 1061.43   7
   4  -7  -3 1587.71 337.431   7
   4  -7  -3 1870.22 305.198   6
   4  -7  -2 7112.14 559.878   6
   4  -7  -2 6977.81 673.834   7
   4  -7  -1 12693.1 781.784   6
   4  -7   0 13666.6 891.224   8
   4  -7   0 13391.6 842.618   6
   4  -7   1 28404.3 1386.83   8
   4  -7   2 5381.19 613.213   8
   4  -7   3 5789.11 325.736  20
   4  -7   3 5779.42 361.834  18
   4  -7   3 5546.58 649.661   8
   4  -7   3 5867.00 347.190  29
   4  -7   4 5239.33 325.451  20
   4  -7   4 5596.03 366.808  18
   4  -7   4 5447.30 681.374   8
   4  -7   4 5795.03 361.886  29
   4  -7   5 904.888 147.372  20
   4  -7   5 861.517 159.307  18
   4  -7   5 783.662 159.500  29
   4  -7   6 2131.83 182.144  20
   4  -7   6 2226.80 218.638  18
   4  -7   6 2783.62 238.802  29
   4  -7   7 2861.00 207.340  18
   4  -7   7 2967.13 215.135  29
   4  -6  -9 622.984 106.884  27
   4  -6  -9 636.467 106.918  23
   4  -6  -8 4598.99 277.703  27
   4  -6  -7 2326.19 198.468  28
   4  -6  -7 2216.06 200.213  27
   4  -6  -7 2291.81 207.394  21
   4  -6  -6 6210.10 309.051  28
   4  -6  -6 6278.23 324.024  27
   4  -6  -6 5907.41 343.299  21
   4  -6  -5 1609.46 151.356  28
   4  -6  -5 1600.18 158.048  27
   4  -6  -5 1391.29 341.038   7
   4  -6  -4 1983.31 394.926   7
   4  -6  -3 4820.73 548.808   7
   4  -6  -2 24881.9 1063.10   6
   4  -6  -2 26246.4 1276.53   7
   4  -6  -1 324.234 182.071   8
   4  -6  -1 340.750 145.050   6
   4  -6   0 20823.2 1092.33   8
   4  -6   0 19400.2 968.130   6
   4  -6   1 17114.3 1022.33   8
   4  -6   2 27675.5 1401.40   8
   4  -6   3 21390.4 1285.63   8
   4  -6   4 11726.5 484.988  20
   4  -6   4 11836.8 540.921  18
   4  -6   4 10701.6 948.102   8
   4  -6   4 11682.7 517.412  29
   4  -6   5 2623.73 216.971  20
   4  -6   5 2945.28 266.878  18
   4  -6   5 2638.77 239.836  29
   4  -6   6 992.786 163.008  18
   4  -6   6 1155.47 171.435  29
   4  -6   7 539.358 122.301  18
   4  -6   7 430.990 120.838  29
   4  -5  -9 6774.51 314.511  27
   4  -5  -9 6571.99 294.140  23
   4  -5  -8 6242.81 317.917  23
   4  -5  -8 5952.49 315.797  27
   4  -5  -7 19027.8 608.718  28
   4  -5  -7 18878.6 631.838  27
   4  -5  -7 17163.9 646.471  21
   4  -5  -6 8044.79 365.107  27
   4  -5  -6 8461.68 359.454  28
   4  -5  -5 1942.96 370.423   7
   4  -5  -4 3597.22 470.745   7
   4  -5  -3 28702.7 1315.52   7
   4  -5  -2 5387.67 551.196   7
   4  -5  -1 9637.33 679.574   8
   4  -5   0 324.116 172.969   8
   4  -5   0 503.021 167.890   6
   4  -5   1 32500.2 1421.56   8
   4  -5   2 25722.4 1317.49   8
   4  -5   3 1669.03 381.431   8
   4  -5   4 3357.73 270.043  18
   4  -5   4 3155.45 503.701   8
   4  -5   4 3272.00 251.212  29
   4  -5   5 3013.23 267.966  18
   4  -5   5 2759.63 251.023  29
   4  -5   5 2493.41 486.645   8
   4  -5   6 8092.42 435.594  18
   4  -5   6 8162.66 419.361  29
   4  -5   7 645.773 135.559  18
   4  -5   7 693.484 133.398  29
   4  -5   8 1344.67 134.850  18
   4  -5   8 1293.64 135.815  29
   4  -4  -9 5130.63 280.255  27
   4  -4  -9 5448.25 269.491  23
   4  -4  -8 6995.02 355.967  27
   4  -4  -8 7700.20 358.947  23
   4  -4  -8 6502.58 354.963  21
   4  -4  -7 55231.5 1374.12  27
   4  -4  -7 52729.7 1416.88  21
   4  -4  -6 74476.0 1715.78  28
   4  -4  -6 75211.4 1739.59  27
   4  -4  -6 71875.2 1804.22  21
   4  -4  -5 4863.93 542.308   7
   4  -4  -4 2097.15 359.434   7
   4  -4  -3 13814.6 850.801   7
   4  -4  -2 29228.9 1278.97   7
   4  -4  -1 26246.1 1147.47   8
   4  -4   0 42287.3 1553.30   8
   4  -4   1 44167.9 1663.88   8
   4  -4   2 18136.6 1056.16   8
   4  -4   3 1293.75 333.821   8
   4  -4   4 3785.89 550.495   8
   4  -4   5 3002.21 272.061  18
   4  -4   5 3183.79 257.104  29
   4  -4   5 2573.15 484.549   8
   4  -4   6 3834.29 308.262  18
   4  -4   6 3931.00 292.876  29
   4  -4   7 439.023 141.784  18
   4  -4   7 466.240 127.718  29
   4  -4   8 647.575 111.623  18
   4  -4   8 501.438 106.778  29
   4  -3 -10 1686.17 133.337  23
   4  -3  -9 6293.13 301.929  23
   4  -3  -9 5169.89 287.167  21
   4  -3  -8 651.542 132.489  27
   4  -3  -8 730.511 136.636  23
   4  -3  -8 469.855 124.652  21
   4  -3  -7 688.740 129.729  27
   4  -3  -7 569.063 141.739  21
   4  -3  -6 16633.9 540.059  28
   4  -3  -6 16813.9 559.261  27
   4  -3  -6 15248.5 1025.97   7
   4  -3  -6 16641.1 611.368  21
   4  -3  -5 6336.19 618.441   7
   4  -3  -4 24059.8 1164.42   7
   4  -3  -3 5146.02 486.715   7
   4  -3  -2 58448.8 1865.68   7
   4  -3  -1 29895.3 1184.15   8
   4  -3  -1 29467.7 1168.40   7
   4  -3   0 8150.48 597.577   8
   4  -3   1 23743.8 1111.25   8
   4  -3   2 40876.8 1624.26   8
   4  -3   3 20597.6 1175.31   8
   4  -3   4 579.265 259.838   8
   4  -3   5 46630.3 1331.82  18
   4  -3   5 46875.3 1272.18  29
   4  -3   5 47193.8 2147.84   8
   4  -3   6 10586.2 529.557  18
   4  -3   6 10757.2 491.693  29
   4  -3   7 5100.80 339.855  18
   4  -3   7 4829.15 305.080  29
   4  -3   8 397.693 107.399  18
   4  -3   8 260.393 93.2200  29
   4  -2 -10 989.780 110.806  23
   4  -2 -10 817.575 97.8025  21
   4  -2  -9 2491.33 200.944  23
   4  -2  -9 2361.22 206.795  21
   4  -2  -8 9930.35 445.535  27
   4  -2  -8 10523.9 436.296  23
   4  -2  -8 10341.2 482.005  21
   4  -2  -7 22277.9 709.891  27
   4  -2  -7 22536.2 709.222  23
   4  -2  -7 22655.2 768.665  21
   4  -2  -6 5788.06 591.107   7
   4  -2  -5 30820.3 1398.11   7
   4  -2  -4 7949.03 640.699   7
   4  -2  -3 21804.5 1014.70   7
   4  -2  -2 53067.8 1723.17   7
  -4  -2   1 11815.3 1029.16   3
   4  -2  -1 11231.5 643.529   8
   4  -2  -1 11700.9 651.808   7
   4  -2   0 18612.7 872.970   8
   4  -2   0 16661.4 805.285   7
   4  -2   1 15884.2 851.447   8
   4  -2   2 28902.4 1287.48   8
   4  -2   3 0.58073 167.211   8
   4  -2   4 15392.5 1072.25   8
   4  -2   5 46696.9 1241.26  29
   4  -2   5 48495.6 2137.22   8
   4  -2   5 42914.3 1365.93  14
   4  -2   6 4835.95 346.797  18
   4  -2   6 4760.15 317.115  29
   4  -2   7 3049.94 266.350  18
   4  -2   7 3019.22 241.563  29
   4  -2   8 1291.52 165.383  18
   4  -2   8 901.227 127.676  29
   4  -1 -10 207.299 71.8563  21
   4  -1  -9 6934.29 338.112  23
   4  -1  -9 7049.10 351.447  21
   4  -1  -8 1673.12 192.507  27
   4  -1  -8 1986.53 193.397  23
   4  -1  -8 1929.96 209.406  21
   4  -1  -7 160.490 93.3554  27
   4  -1  -7 294.963 134.818  23
   4  -1  -7 231.292 112.289  21
   4  -1  -6 4189.38 504.287   7
   4  -1  -5 3072.82 432.556   7
   4  -1  -4 467.613 198.795   7
   4  -1  -3 11513.8 706.426   7
   4  -1  -2 9749.87 617.263   7
   4  -1  -1 237.970 125.108   8
   4  -1  -1 455.168 165.894   7
   4  -1   0 28714.7 1081.56   8
   4  -1   0 25181.2 968.642   7
   4  -1   1 21342.8 969.921   8
   4  -1   2 7768.56 614.178   8
   4  -1   3 18894.4 1069.55   8
   4  -1   4 7536.64 736.396   8
   4  -1   5 77791.4 1862.34  29
   4  -1   5 77340.5 2854.09   8
   4  -1   5 75332.6 2010.36  14
   4  -1   6 39937.9 1971.49   8
   4  -1   6 38606.4 1296.19  14
   4  -1   6 41701.9 1151.20  29
   4  -1   7 3480.83 284.824  18
   4  -1   7 3335.68 251.747  29
   4  -1   8 437.086 119.287  18
   4  -1   8 570.755 112.333  29
   4   0 -10-108.001 74.6312  21
   4   0  -9 7713.05 354.338  23
   4   0  -9 7295.00 370.361  21
   4   0  -8 14406.5 535.879  23
   4   0  -8 14324.8 581.636  21
   4   0  -7 107221. 2472.48  27
   4   0  -7 113094. 2474.92  23
   4   0  -7 112761. 2554.52  21
   4   0  -6 24881.5 1311.89   7
   4   0  -5 5535.32 571.619   7
   4   0  -4 1103.45 275.256   7
   4   0  -3 88165.7 2388.57  10
   4   0  -3 97989.8 2609.90   7
   4   0  -2 34578.5 1212.10  10
   4   0  -2 34685.8 1243.04   7
   4   0  -1 14945.2 686.999   8
   4   0  -1 16943.1 742.304   7
   4   0   0 439.307 145.858   8
   4   0   0 510.010 139.036   7
   4   0   1 58711.3 1789.59   8
   4   0   2 38298.8 1452.93   8
   4   0   3 11236.4 808.863   8
   4   0   3 11252.4 763.940   5
  -4   0  -4 4069.16 431.878  11
   4   0   4 4321.45 534.855   5
   4   0   5 7912.52 419.286  26
   4   0   5 8359.00 474.284  14
   4   0   6 5312.96 319.849  29
   4   0   6 5097.64 656.763   8
   4   0   6 5209.91 399.233  14
   4   0   7 397.743 109.687  29
   4   0   7 204.082 161.561  14
   4   0   8 11321.6 468.217  18
   4   0   8 9519.19 387.142  29
   4   1 -10 172.159 74.4913  21
  -4   1   9 5925.68 302.051  29
   4   1  -9 6724.63 352.853  21
  -4   1   8 1790.17 180.340  29
   4   1  -8 1934.27 197.813  23
   4   1  -8 2146.41 220.104  21
   4   1  -7 16.0513 114.739  23
   4   1  -7 323.737 239.531   7
   4   1  -7 311.826 119.723  21
   4   1  -6 5052.19 570.585   7
   4   1  -5 2595.56 399.207   7
   4   1  -4 326.023 197.777   7
   4   1  -3 10804.5 626.726  10
   4   1  -3 11720.7 698.541   7
   4   1  -2 9866.75 601.265  10
   4   1  -2 10492.6 615.698   7
  -4   1   1 293.787 108.684  11
   4   1  -1 415.764 229.381  10
   4   1  -1 290.319 112.911   8
   4   1  -1 275.798 124.586   7
   4   1   0 24705.5 883.623   7
   4   1   0 26232.0 930.894   8
   4   1   1 20582.3 872.449   8
  -4   1  -2 8052.93 537.242  11
   4   1   2 7428.56 555.477   8
   4   1   2 7194.14 526.969   5
  -4   1  -3 18874.2 896.425  11
   4   1   3 17386.8 963.247   5
   4   1   4 7533.14 696.933   5
  -4   1  -4 7125.29 561.776  11
   4   1   5 78303.4 2009.08  14
   4   1   5 78512.0 1942.89  26
   4   1   5 76301.9 2757.20   5
   4   1   6 42543.4 1308.58  14
   4   1   6 41079.5 1191.81  26
   4   1   7 3211.78 327.367  14
   4   1   8 485.610 126.059  18
  -4   2  10 644.718 83.1325  29
  -4   2   9 2261.73 192.147  29
   4   2  -9 2515.47 216.106  21
  -4   2   8 9623.50 442.368  29
   4   2  -8 10042.1 439.242  23
  -4   2   7 21172.3 725.062  29
   4   2  -7 20187.7 1231.99   7
   4   2  -7 22324.2 714.185  23
   4   2  -7 22791.0 764.132  21
   4   2  -6 6584.80 661.454   7
   4   2  -5 33622.5 1469.21   7
   4   2  -4 8012.81 626.020   7
   4   2  -3 19712.6 910.300  10
   4   2  -3 21098.0 971.583   7
   4   2  -2 52735.3 1680.29  10
   4   2  -2 54538.2 1670.28   7
   4   2  -1 10191.5 651.370  10
   4   2  -1 10239.8 561.943   7
  -4   2   1 10485.6 516.102  11
   4   2   0 17929.4 883.830  10
  -4   2   0 17223.4 737.690  11
  -4   2  -1 15483.2 728.178  11
   4   2   2 25647.7 1072.48   5
  -4   2  -2 28735.5 1099.46  11
  -4   2  -3 9.79852 118.430  11
   4   2   3-38.7788 129.462   5
   4   2   4 15373.7 988.678   5
  -4   2  -4 16636.9 897.664  11
   4   2   5 46897.9 1322.68  14
   4   2   5 43595.7 1298.28  26
   4   2   5 44980.6 1972.67   5
   4   2   6 5050.39 376.198  14
   4   2   6 4514.93 326.352  26
   4   2   7 2869.78 302.343  14
   4   2   8 866.138 167.482  14
  -4   3  10 1677.69 125.275  29
  -4   3   9 5868.12 306.026  29
   4   3  -9 5828.45 326.294  21
  -4   3   8 626.665 135.649  29
   4   3  -8 644.947 144.069  21
  -4   3   7 774.127 142.430  29
   4   3  -7 667.052 134.679  23
   4   3  -7 720.613 284.715   7
   4   3  -7 866.797 149.985  21
  -4   3   6 16058.1 588.142  29
   4   3  -6 16129.8 1082.47   7
   4   3  -6 16489.2 566.476  23
   4   3  -6 16437.4 604.143  21
   4   3  -5 6964.81 642.510   7
   4   3  -4 25366.3 1188.84   7
   4   3  -3 5775.47 501.602   7
   4   3  -2 55531.1 1779.64  10
   4   3  -2 53856.5 1685.31   7
  -4   3   2 53464.1 1512.86  11
   4   3  -1 28797.3 1152.99  10
   4   3  -1 27412.9 1007.68   7
  -4   3   1 28051.6 983.564  11
   4   3   0 8214.28 605.861  10
  -4   3   0 7813.71 496.444  11
  -4   3  -1 22107.7 928.857  11
  -4   3  -2 37013.0 1345.88  11
   4   3   3 18410.2 981.444   5
  -4   3  -3 19522.9 961.214  11
  -4   3  -4 437.883 178.953  11
   4   3   4 445.308 198.723   5
   4   3   5 46246.4 1319.42  14
   4   3   5 43753.0 1940.28   5
   4   3   6 11044.3 549.108  14
   4   3   6 10411.3 526.743  26
   4   3   7 4611.86 369.921  14
   4   3   7 4929.11 314.190  26
   4   3   8 340.018 132.574  14
  -4   4   9 5036.32 281.076  29
   4   4  -9 5019.62 291.434  21
  -4   4   8 7108.32 377.365  29
   4   4  -8 7303.27 385.724  21
  -4   4   7 54454.0 1436.59  29
   4   4  -7 54936.2 1441.13  21
  -4   4   6 74619.2 1818.63  29
   4   4  -6 73312.2 1806.44  21
   4   4  -5 6040.16 609.355   7
   4   4  -4 2375.63 376.611   7
   4   4  -3 13725.4 802.917   7
   4   4  -2 28238.0 1131.47   7
  -4   4   2 28447.6 1019.24  11
   4   4  -1 26029.4 1131.31  10
   4   4  -1 24090.3 961.474   7
  -4   4   1 26822.6 1001.38  11
   4   4   0 40569.7 1484.96  10
  -4   4   0 38106.7 1323.25  11
   4   4   1 38391.4 1463.67  10
  -4   4  -1 37128.7 1348.11  11
  -4   4  -2 18412.1 915.689  11
  -4   4  -3 1306.53 270.622  11
   4   4   4 3339.78 453.608   5
  -4   4  -4 4100.49 474.608  11
   4   4   5 2859.72 266.167  14
   4   4   5 1964.34 402.928   5
   4   4   6 3432.80 315.974  14
   4   4   6 3727.74 303.698  26
   4   4   7 397.034 153.580  14
   4   4   7 611.796 142.649  26
   4   4   8 541.606 140.212  14
  -4   5   9 6691.77 318.525  29
  -4   5   8 6091.72 343.270  29
   4   5  -8 5679.10 333.702  21
  -4   5   7 19558.9 698.478  29
   4   5  -7 18915.3 682.869  21
  -4   5   6 8259.67 411.689  29
   4   5  -6 7744.65 386.244  21
   4   5  -5 2494.42 431.508   7
   4   5  -4 3990.90 493.683   7
   4   5  -3 29610.8 1294.67   7
  -4   5   3 31527.8 1286.63   5
   4   5  -2 5286.11 473.171   7
  -4   5   2 5019.35 414.984  11
   4   5  -1 9182.70 670.449  10
  -4   5   1 9344.77 588.614  11
  -4   5   0 528.456 201.375  11
   4   5   0 380.554 219.288  10
   4   5   1 29537.2 1287.39  10
  -4   5  -1 30660.3 1244.71  11
  -4   5  -2 24567.1 1137.85  11
  -4   5  -3 2379.41 367.016  11
   4   5   4 3113.24 245.660  14
   4   5   4 3282.60 253.863  16
  -4   5  -4 3759.53 470.681  11
   4   5   5 2552.78 239.793  16
   4   5   5 2521.67 249.120  14
   4   5   5 2640.02 439.144   5
   4   5   6 7806.82 448.902  14
   4   5   7 614.935 140.732  26
   4   5   7 710.918 158.307  14
   4   5   8 1174.41 157.786  14
  -4   6   9 656.764 111.011  29
  -4   6   8 5023.37 308.208  29
  -4   6   7 2432.45 231.845  29
   4   6  -7 2193.80 211.198  21
  -4   6   6 6073.12 359.815  29
   4   6  -6 6165.13 341.698  21
  -4   6   5 1647.51 188.638  29
   4   6  -5 1653.45 163.753  12
  -4   6   4 2508.78 388.764   5
   4   6  -4 2663.12 415.413   7
   4   6  -3 4298.65 481.839   7
  -4   6   3 5193.74 524.755   5
   4   6  -2 25632.7 1138.54   7
  -4   6   2 25398.3 1082.49  11
  -4   6   1 716.144 207.678  11
   4   6   0 20794.5 1074.99  10
  -4   6   0 20649.8 995.184  11
   4   6   1 16625.3 952.852  10
  -4   6  -1 14952.3 875.142  11
  -4   6  -2 26063.0 1228.48  11
  -4   6  -3 19827.5 1092.20  11
   4   6   4 11685.2 504.272  16
  -4   6  -4 12022.2 843.155  11
   4   6   5 2512.82 236.604  16
   4   6   5 2544.17 242.941  14
   4   6   6 1181.02 188.866  14
   4   6   7 389.680 129.053  14
   4   6   7 351.114 114.196  26
  -4   7   9 54.4302 74.3465  29
  -4   7   8 3417.95 247.603  29
  -4   7   7 1483.36 189.292  29
  -4   7   6 9627.75 458.521  29
   4   7  -6 7787.75 390.717  21
  -4   7   5 2206.92 218.561  29
  -4   7   4 17498.2 637.276  29
  -4   7   4 18580.1 1089.67   5
  -4   7   3 1893.44 345.214   5
  -4   7   2 6557.79 544.224  11
  -4   7   1 12827.6 805.309  11
   4   7   0 13359.2 888.400  10
  -4   7   0 13656.5 834.560  11
   4   7   1 26502.4 1278.31  10
  -4   7  -1 25541.0 1230.97  11
  -4   7  -2 5063.83 541.998  11
   4   7   3 5872.32 337.046  16
  -4   7  -3 5846.65 596.191  11
   4   7   4 5556.71 343.118  16
  -4   7  -4 4893.10 558.895  11
   4   7   5 784.588 161.597  16
   4   7   5 656.431 141.881  14
   4   7   6 2016.49 219.507  14
   4   7   7 2745.21 223.022  14
   4   7   7 2742.18 224.723  26
  -4   8   8 1203.83 151.996  29
  -4   8   7 1571.62 188.899  29
  -4   8   6 5207.98 334.718  29
  -4   8   5 24540.4 822.317  29
  -4   8   4 3035.03 472.907   5
  -4   8   4 2875.72 240.775  24
  -4   8   4 2852.88 251.501  29
   4   8  -4 3095.27 221.511  12
  -4   8   3 21410.1 1228.49   5
   4   8  -3 19796.3 646.284  12
  -4   8   2 17357.1 991.356  11
  -4   8   1 28403.9 1310.41  11
   4   8   0 11117.8 830.908  10
  -4   8   0 10552.2 780.045  11
   4   8   1 12937.9 892.183  10
  -4   8  -1 11383.4 835.164  11
   4   8   2 10642.3 456.894  16
  -4   8  -2 10722.8 824.685  11
   4   8   3 3756.91 275.024  16
  -4   8  -3 3165.64 461.441  11
   4   8   4 6084.49 361.508  16
   4   8   5 7109.56 380.052  16
   4   8   5 6004.78 352.427  14
   4   8   6 9948.03 446.071  14
   4   8   7 970.269 137.211  14
   4   8   7 983.258 136.802  26
  -4   9   8 229.373 92.9338  29
  -4   9   7 1187.50 165.973  29
  -4   9   6 2905.28 249.145  29
  -4   9   5 4821.31 324.514  29
  -4   9   4 37973.9 1742.90   5
  -4   9   4 36488.3 1059.41  29
  -4   9   4 36144.8 1043.82  24
   4   9  -4 33802.8 963.327  12
  -4   9   3 2057.69 408.413   5
  -4   9   3 1825.67 203.806  24
   4   9  -3 1691.55 174.590  12
  -4   9   2 2210.78 354.187  11
   4   9  -2 2715.60 216.386  12
  -4   9   2 2796.92 241.587  24
   4   9  -1 17424.5 596.112  12
  -4   9   1 17745.0 641.370  24
  -4   9   1 16977.1 1043.49  11
   4   9   0 11996.3 897.075  10
  -4   9   0 12096.2 514.247  24
  -4   9   0 11344.3 850.943  11
  -4   9  -1 7899.99 401.900  24
  -4   9  -1 6999.34 674.240  11
  -4   9  -2 4741.15 311.395  24
  -4   9  -2 4605.53 558.816  11
   4   9   3 14812.6 575.236  16
  -4   9  -3 13292.9 546.586  24
   4   9   4 16804.6 632.989  16
   4   9   5 4839.55 294.589  14
   4   9   5 5489.20 323.017  16
   4   9   6 1974.77 181.266  14
  -4  10   7 3843.21 243.029  29
  -4  10   6 8151.72 394.212  29
  -4  10   5 9485.35 452.294  29
  -4  10   5 9348.01 414.309  22
   4  10  -4 9799.57 407.325  12
  -4  10   4 9997.87 474.093  29
  -4  10   3 20870.2 1281.12   5
   4  10  -3 20586.8 671.447  12
  -4  10   3 21405.7 743.833  24
   4  10  -2 12058.8 473.007  12
  -4  10   2 11039.7 500.565  24
   4  10  -1 5116.07 616.060  10
  -4  10   1 5013.98 330.848  24
  -4  10   1 5256.70 593.464  11
   4  10   0 9869.58 843.296  10
  -4  10   0 11077.2 495.142  24
  -4  10   0 10326.5 840.991  11
  -4  10  -1 4252.83 296.939  24
  -4  10  -1 3861.95 537.403  11
   4  10   2 12205.3 508.422  16
  -4  10  -2 11450.1 501.454  24
   4  10   3 462.463 140.771  16
  -4  10  -3 195.738 102.248  24
   4  10   4 2048.12 215.713  16
   4  10   5 2400.48 210.279  16
   4  10   6 2140.54 166.896  14
   4  10   6 2273.36 193.944  26
  -4  11   7 1996.99 158.344  29
  -4  11   6 1628.38 174.034  29
  -4  11   5 3814.55 274.171  29
  -4  11   5 3892.84 248.790  22
  -4  11   4 1227.97 173.805  29
  -4  11   3 6693.53 375.445  29
  -4  11   3 6732.60 376.966  24
  -4  11   2 25613.3 842.901  24
  -4  11   1 2344.61 234.862  24
  -4  11   0 31894.0 977.956  24
  -4  11  -1 19507.4 692.597  24
   4  11   2 2426.02 219.828  16
  -4  11  -2 2324.56 212.371  24
   4  11   3 1775.60 190.203  16
  -4  11  -3 1606.32 168.703  24
   4  11   4 17570.0 605.199  16
   4  11   5 1531.18 158.749  16
  -4  12   6 3678.20 213.934  29
  -4  12   5 10633.7 420.173  29
  -4  12   5 9941.29 391.638  22
  -4  12   4 6424.51 336.906  29
  -4  12   3 279.143 105.183  29
  -4  12   2 12438.6 523.421  24
  -4  12   1 2349.49 236.638  24
  -4  12   0 14857.1 583.844  24
  -4  12  -1 773.362 144.971  24
   4  12   2 604.954 122.832  16
  -4  12  -2 715.456 131.066  24
   4  12   3 6969.82 342.457  16
   4  12   4 752.116 120.765  16
  -4  13   5 221.409 70.2965  29
  -4  13   5 315.613 73.7521  22
  -4  13   4 4417.71 253.923  29
  -4  13   4 4499.56 252.281  22
  -4  13   3 8122.88 363.103  29
  -4  13   2 15292.3 553.997  29
  -4  13   2 16119.0 582.623  24
  -4  13   1 8108.77 391.625  24
  -4  13   0 2063.16 201.088  24
   4  13   1 7809.23 343.574  16
  -4  13  -1 7936.73 367.127  24
   4  13   2 38535.7 984.698  16
  -4  13  -2 36361.0 969.148  24
   4  13   3 206.913 88.8369  16
  -4  14   4 5187.31 228.518  29
  -4  14   4 5351.77 237.740  22
  -4  14   3 8437.47 330.556  29
  -4  14   3 8811.85 347.172  22
  -4  14   2 2042.81 162.529  29
  -4  14   1 1554.07 146.316  29
  -4  14   0 8450.95 355.876  24
   4  14   1 13592.2 433.751  16
  -4  14  -1 13681.2 457.124  24
   4  14   2 56.9593 68.1307  16
   5 -14  -2 907.395 85.0646  27
   5 -14  -1 161.777 72.1029  20
   5 -14  -1 232.267 56.2713  27
   5 -14   0 2754.54 166.932  20
   5 -13  -4 2895.39 167.135  17
   5 -13  -4 3517.51 179.194  27
   5 -13  -3 3024.22 175.505  27
   5 -13  -2 4642.23 222.071  27
   5 -13  -2 4288.82 240.954  20
   5 -13  -1 1757.40 135.592  27
   5 -13  -1 1793.98 161.720  20
   5 -13   0 5989.50 291.652  20
   5 -13   1 406.700 97.5487  20
   5 -13   2 7609.63 309.216  20
   5 -12  -5 37.3405 54.3340  28
   5 -12  -5 85.5289 66.4826  27
   5 -12  -4 7140.88 300.634  27
   5 -12  -3 2596.08 179.817  27
   5 -12  -3 2382.16 193.860  20
   5 -12  -2 14909.7 482.794  27
   5 -12  -2 13520.2 520.498  20
   5 -12  -1 5007.55 251.003  27
   5 -12  -1 4731.68 282.027  20
   5 -12   0 783.976 134.704  20
   5 -12   1 14810.4 531.018  20
   5 -12   2 683.015 120.600  20
   5 -12   3 15533.8 502.245  20
   5 -11  -6 2322.45 143.152  28
   5 -11  -6 2174.29 156.013  27
   5 -11  -5 1837.94 137.686  28
   5 -11  -5 1820.73 155.024  27
   5 -11  -4 1682.01 157.196  27
   5 -11  -3 888.422 146.846  20
   5 -11  -3 1171.19 135.279  27
   5 -11  -2 22762.6 676.118  27
   5 -11  -2 22813.7 745.685  20
   5 -11  -1 13260.6 467.866  27
   5 -11  -1 13543.5 528.360  20
   5 -11   0 8719.86 408.124  20
   5 -11   1 1538.14 160.547  15
   5 -11   1 1681.35 188.900  20
   5 -11   2 1116.62 150.351  20
   5 -11   2 890.263 122.285  15
   5 -11   3 3995.64 249.026  20
   5 -11   4 7629.02 317.014  20
   5 -10  -7 90.0465 66.0514  27
   5 -10  -6 74.2030 67.7365  28
   5 -10  -6 96.6977 76.0051  27
   5 -10  -5 896.695 112.071  28
   5 -10  -5 807.094 123.125  27
   5 -10  -4 11957.3 445.521  27
   5 -10  -4 11308.9 486.310  20
   5 -10  -3 7299.93 334.023  27
   5 -10  -3 7023.58 375.881  20
   5 -10  -2 1948.65 169.610  27
   5 -10  -2 1686.26 196.112  20
   5 -10  -1 894.072 152.231  20
   5 -10   0 40879.9 1089.95  15
   5 -10   0 39345.7 1112.65  20
   5 -10   1 8681.08 389.676  15
   5 -10   1 9627.94 429.959  20
   5 -10   2 12214.2 497.305  20
   5 -10   3 1220.11 178.025  18
   5 -10   3 1454.64 171.441  20
   5 -10   4 1370.85 175.210  18
   5 -10   4 1638.51 159.801  20
   5 -10   5 4917.07 233.588  20
   5  -9  -7 880.460 115.567  27
   5  -9  -6 5073.17 252.167  28
   5  -9  -6 5118.97 272.383  27
   5  -9  -6 4903.66 279.542  21
   5  -9  -5 2327.15 176.447  28
   5  -9  -5 2330.92 190.612  27
   5  -9  -4 9993.77 408.644  27
   5  -9  -4 9550.85 457.819  20
   5  -9  -3 557.836 139.716  20
   5  -9  -3 511.133 108.091  27
   5  -9  -2 10712.8 931.858   7
   5  -9  -2 11829.0 501.626  20
   5  -9  -1 29482.7 1601.10   7
   5  -9  -1 29293.3 887.455  20
   5  -9   0 1675.23 170.749  15
   5  -9   0 1394.06 184.626  26
   5  -9   0 1586.16 175.939  20
   5  -9   1-29.5464 88.4800  20
   5  -9   1 52.8315 108.534  18
   5  -9   1 44.3779 70.4080  15
   5  -9   1 24.6957 86.9885  26
   5  -9   2 2943.27 279.795  18
   5  -9   2 3285.56 251.247  20
   5  -9   3 2682.22 223.860  20
   5  -9   3 2812.32 272.632  18
   5  -9   4 306.234 102.030  20
   5  -9   4 412.887 128.658  18
   5  -9   5 6445.18 346.504  18
   5  -9   5 7036.36 304.761  20
   5  -9   6-3.77191 61.4940  18
   5  -8  -8 2839.96 175.700  27
   5  -8  -8 2986.69 177.698  23
   5  -8  -7 2207.71 167.113  28
   5  -8  -7 2393.71 183.280  27
   5  -8  -7 2308.79 183.223  21
   5  -8  -6 19968.3 609.389  28
   5  -8  -6 20623.0 639.966  27
   5  -8  -6 19619.9 672.890  21
   5  -8  -5 1577.34 151.084  28
   5  -8  -5 1312.73 149.209  27
   5  -8  -4 2836.65 206.877  27
   5  -8  -4 2202.29 437.954   7
   5  -8  -4 2944.63 253.569  20
   5  -8  -3 28099.6 1518.63   7
   5  -8  -3 27676.4 871.475  20
   5  -8  -2 93106.7 2190.68  26
   5  -8  -2 90516.6 3067.74   7
   5  -8  -2 85547.3 2084.37  20
   5  -8  -1 7436.90 412.211  26
   5  -8  -1 7536.46 768.540   7
   5  -8  -1 7915.69 383.495  20
   5  -8   0 22212.8 840.120  18
   5  -8   0 24382.4 1340.84   8
   5  -8   0 23278.4 705.397  15
   5  -8   0 22286.3 778.829  26
   5  -8   0 22866.6 735.599  20
   5  -8   1 1919.27 236.686  18
   5  -8   1 1666.21 375.400   8
   5  -8   1 1925.76 203.975  26
   5  -8   1 2328.70 209.998  20
   5  -8   2 1841.68 192.406  20
   5  -8   2 1732.80 224.834  18
   5  -8   2 1999.91 407.494   8
   5  -8   3 5494.14 334.919  20
   5  -8   3 6139.65 404.179  18
   5  -8   4 10471.4 438.795  20
   5  -8   4 10104.7 510.880  18
   5  -8   5 335.421 94.1700  20
   5  -8   5 161.583 115.303  18
   5  -8   6 844.756 126.143  18
   5  -7  -8 106.229 77.5575  27
   5  -7  -8 94.0085 82.6607  23
   5  -7  -7 3385.01 227.319  27
   5  -7  -7 3338.80 241.658  21
   5  -7  -6 16874.4 554.727  28
   5  -7  -6 17344.5 581.991  27
   5  -7  -6 17257.3 632.720  21
   5  -7  -5 4326.05 239.178  28
   5  -7  -5 4239.30 257.052  27
   5  -7  -4 6163.22 303.538  27
   5  -7  -4 5737.08 665.533   7
   5  -7  -4 6028.98 351.183  20
   5  -7  -3 7708.95 792.165   7
   5  -7  -3 7672.86 388.355  20
   5  -7  -2 807.116 132.950  20
   5  -7  -2 579.223 131.517  26
   5  -7  -1 6648.38 697.312   7
   5  -7   0 8173.37 747.522   8
   5  -7   1 11424.7 543.443  18
   5  -7   1 11185.7 896.672   8
   5  -7   1 10244.2 469.196  26
   5  -7   1 10608.7 442.949  20
   5  -7   2 21403.7 699.513  20
   5  -7   2 23165.5 814.964  18
   5  -7   2 23448.7 1360.70   8
   5  -7   3 5593.89 324.517  20
   5  -7   3 5790.52 381.340  18
   5  -7   3 5864.72 678.250   8
   5  -7   3 5543.08 345.609  29
   5  -7   4 1403.31 160.239  20
   5  -7   4 1746.34 227.281  18
   5  -7   4 1471.50 189.808  29
   5  -7   5 16164.2 559.464  20
   5  -7   5 17822.0 670.517  18
   5  -7   5 17953.2 635.928  29
   5  -7   6 1243.87 162.615  18
   5  -7   6 1201.48 151.008  29
   5  -6  -9 676.987 96.4790  27
   5  -6  -9 697.489 93.3058  23
   5  -6  -8 4085.68 247.017  27
   5  -6  -8 4825.63 252.527  23
   5  -6  -8 4070.84 243.711  21
   5  -6  -7 5945.23 303.144  27
   5  -6  -7 5374.88 320.489  21
   5  -6  -6 17001.0 559.349  28
   5  -6  -6 17145.0 577.881  27
   5  -6  -6 16995.7 639.539  21
   5  -6  -5 1645.77 151.190  28
   5  -6  -5 1677.27 165.011  27
   5  -6  -5 1436.53 342.815   7
   5  -6  -4 10440.7 860.479   7
   5  -6  -4 10052.4 456.234  20
   5  -6  -3 3194.55 479.582   7
   5  -6  -2 34687.1 1614.65   7
   5  -6  -1 17844.8 1100.58   7
   5  -6   0 64511.7 2307.51   8
   5  -6   1 18379.9 1146.17   8
   5  -6   2 12443.3 482.295  20
   5  -6   2 12582.5 560.839  18
   5  -6   2 12796.4 985.828   8
   5  -6   2 11523.8 495.078  26
   5  -6   2 11956.0 504.549  29
   5  -6   3 2082.50 187.414  20
   5  -6   3 2441.78 249.723  18
   5  -6   3 2459.79 221.728  29
   5  -6   3 2458.75 458.587   8
   5  -6   4 10186.0 506.837  18
   5  -6   4 9667.28 464.632  29
   5  -6   5 4795.06 336.414  18
   5  -6   5 3815.65 286.056  29
   5  -6   6 1397.93 181.912  18
   5  -6   6 1242.01 163.588  29
   5  -6   7 2606.10 191.206  18
   5  -6   7 2468.95 177.631  29
   5  -5  -9 639.625 101.643  27
   5  -5  -9 713.776 104.385  23
   5  -5  -9 603.078 90.7631  21
   5  -5  -8 1337.94 149.870  27
   5  -5  -8 1237.31 153.391  23
   5  -5  -8 1071.47 146.639  21
   5  -5  -7 7738.67 363.955  27
   5  -5  -7 7963.77 399.506  21
   5  -5  -6 17700.1 578.304  28
   5  -5  -6 18655.3 602.910  27
   5  -5  -6 18290.3 673.135  21
   5  -5  -5 793.171 113.244  28
   5  -5  -5 777.348 114.927  27
   5  -5  -5 601.050 216.846   7
   5  -5  -4 14185.6 989.426   7
   5  -5  -3 2048.59 396.959   7
   5  -5  -2 49758.4 1930.12   7
   5  -5  -1 12267.0 846.813   8
   5  -5  -1 11789.1 847.239   7
   5  -5   0 43679.2 1769.50   8
   5  -5   1 15521.3 1013.75   8
   5  -5   2 3414.58 506.077   8
   5  -5   3 2309.81 239.044  18
   5  -5   3 2078.72 201.862  29
   5  -5   3 2387.83 447.814   8
   5  -5   4 6458.66 410.118  18
   5  -5   4 6534.50 370.795  29
   5  -5   4 6505.77 745.870   8
   5  -5   5 14729.8 616.946  18
   5  -5   5 13738.6 566.077  29
   5  -5   6 5736.40 349.547  18
   5  -5   6 5078.95 311.431  29
   5  -5   7 5821.57 305.662  18
   5  -5   7 5745.63 285.056  29
   5  -4  -9 424.377 97.3183  23
   5  -4  -9 381.330 91.9290  21
   5  -4  -8 589.688 123.027  27
   5  -4  -8 697.927 135.289  23
   5  -4  -8 461.305 124.136  21
   5  -4  -7 7498.47 356.799  27
   5  -4  -7 8219.54 377.322  23
   5  -4  -7 8090.74 411.930  21
   5  -4  -6 10484.0 407.765  28
   5  -4  -6 10815.0 425.637  27
   5  -4  -6 9975.26 478.140  21
   5  -4  -5 3355.19 203.882  28
   5  -4  -5 3285.67 496.038   7
   5  -4  -4 13248.9 949.362   7
   5  -4  -3 49062.2 1906.16   7
   5  -4  -2 3573.72 466.804   7
   5  -4  -1 1170.11 290.104   8
   5  -4  -1 1405.64 303.252   7
   5  -4   0 4402.24 520.371   8
   5  -4   0 4042.01 456.616   7
   5  -4   1 33952.1 1533.66   8
   5  -4   2 2961.28 467.568   8
   5  -4   3 1526.73 196.507  18
   5  -4   3 1359.18 362.138   8
   5  -4   4 15068.1 635.937  18
   5  -4   4 14578.1 575.914  29
   5  -4   4 15541.6 1156.02   8
   5  -4   5 12638.3 571.482  18
   5  -4   5 11586.3 508.538  29
   5  -4   6 31883.3 978.414  18
   5  -4   6 28905.0 893.726  29
   5  -4   7 2084.26 203.054  18
   5  -4   7 2001.66 174.165  29
   5  -3  -9 3015.16 198.330  23
   5  -3  -9 2907.14 208.265  21
   5  -3  -8 3266.28 235.289  27
   5  -3  -8 3373.79 232.289  23
   5  -3  -8 3396.48 262.992  21
   5  -3  -7 22591.6 719.100  27
   5  -3  -7 24051.2 736.410  23
   5  -3  -7 24352.8 801.258  21
   5  -3  -6 44237.2 1127.64  27
   5  -3  -6 43286.9 1874.33   7
   5  -3  -6 43599.2 1229.12  21
   5  -3  -5 22346.1 1274.56   7
   5  -3  -4 7658.55 689.313   7
   5  -3  -3 22558.4 1166.14   7
   5  -3  -2 52792.8 1882.48   7
   5  -3  -1 11392.2 748.214   8
   5  -3  -1 10364.0 730.413   7
   5  -3   0 237.215 165.076   8
   5  -3   0 291.698 173.313   7
   5  -3   1 23720.3 1219.12   8
   5  -3   2 13721.4 952.917   8
   5  -3   3 1302.30 338.320   8
   5  -3   4 301.698 126.961  18
   5  -3   4 228.813 100.809  29
   5  -3   4 88.6046 192.576   8
   5  -3   4 281.067 104.815  26
   5  -3   5 4097.26 331.374  18
   5  -3   5 4224.98 290.401  29
   5  -3   6 26552.3 890.710  18
   5  -3   6 25118.6 799.123  29
   5  -3   7 7418.69 374.209  18
   5  -3   7 6407.08 318.984  29
   5  -2  -9 595.592 115.657  23
   5  -2  -9 591.251 116.601  21
   5  -2  -8 266.181 110.589  27
   5  -2  -8 424.031 116.241  23
   5  -2  -8 389.174 130.688  21
   5  -2  -7 10269.6 426.462  27
   5  -2  -7 10373.5 433.117  23
   5  -2  -7 10298.7 485.238  21
   5  -2  -6 62018.6 1509.56  23
   5  -2  -6 65765.7 1614.07  21
   5  -2  -5 16697.9 1068.92   7
   5  -2  -4 15705.3 977.166   7
   5  -2  -3 8559.38 692.731   7
   5  -2  -2 31730.7 1334.44   7
   5  -2  -1 9499.82 657.384   8
   5  -2  -1 9374.98 653.536   7
   5  -2   0 5741.00 523.193   8
   5  -2   0 5444.11 479.943   7
   5  -2   1 13008.1 851.339   8
   5  -2   2 37669.7 1630.10   8
   5  -2   3 192.811 214.798   8
   5  -2   4 5278.73 357.797  18
   5  -2   4 5515.24 662.468   8
   5  -2   4 5287.62 332.115  26
  -5  -2  -5 3013.23 415.445  11
   5  -2   5 3608.03 303.969  18
   5  -2   5 2728.99 500.020   8
   5  -2   6 6019.19 392.323  18
   5  -2   6 5928.97 328.327  29
   5  -2   7 514.929 133.110  18
   5  -2   7 460.469 105.832  29
   5  -2   8 993.868 124.279  18
   5  -1  -9 269.766 96.6727  23
   5  -1  -9 371.252 105.312  21
   5  -1  -8 2217.67 203.797  23
   5  -1  -8 2036.54 218.118  21
   5  -1  -7 3713.45 248.417  27
   5  -1  -7 3472.45 242.849  23
   5  -1  -7 3772.82 288.780  21
   5  -1  -6 38257.2 1703.97   7
   5  -1  -6 36068.2 986.235  23
   5  -1  -6 37181.9 1066.53  21
   5  -1  -5 3693.16 495.731   7
   5  -1  -4 13655.2 900.136   7
   5  -1  -3 1876.83 331.956   7
   5  -1  -2 5819.09 519.939   7
   5  -1  -1 78586.3 2238.96   8
   5  -1  -1 73093.6 2211.86   7
   5  -1   0 25065.5 1092.91   8
   5  -1   0 22940.9 1002.17   7
   5  -1   1 9286.43 685.150   8
   5  -1   2 4833.37 536.925   8
   5  -1   3 262.278 199.135   8
  -5  -1  -4 3790.02 464.368  11
   5  -1   4 4021.38 310.778  18
   5  -1   4 4074.50 568.060   8
   5  -1   4 3970.69 342.582  14
   5  -1   4 4175.74 299.277  26
   5  -1   5 31641.9 1001.18  18
   5  -1   5 29101.7 1617.14   8
   5  -1   5 30182.3 950.451  26
  -5  -1  -5 28496.9 1338.74  11
   5  -1   6 34359.9 1062.75  18
   5  -1   7 714.309 154.972  18
   5  -1   8 3566.25 222.143  18
   5   0  -9-30.3157 100.974  23
   5   0  -9 45.2770 91.3627  21
   5   0  -8 857.601 145.871  23
   5   0  -8 941.746 161.293  21
   5   0  -7 30657.3 904.067  27
   5   0  -7 33168.8 930.538  23
   5   0  -7 33611.4 999.678  21
   5   0  -6 6822.97 696.674   7
   5   0  -6 6007.67 307.679  23
   5   0  -6 6948.00 373.378  21
   5   0  -5 4545.86 562.323   7
   5   0  -4 495.452 222.487   7
   5   0  -3 6409.81 566.226   7
   5   0  -2 74727.0 2250.60   7
   5   0  -1 4386.62 393.076   8
   5   0  -1 4072.31 399.918   7
   5   0   0 4621.60 419.350   8
   5   0   1 3760.26 418.621   8
   5   0   2 2924.12 409.731   8
  -5   0  -3 1643.86 309.050  11
   5   0   3 1201.86 311.792   8
  -5   0  -4 4464.74 492.496  11
   5   0   4 4032.59 551.280   8
   5   0   4 3516.74 315.102  14
   5   0   4 3866.37 301.536  26
  -5   0  -5 542.529 168.471  11
   5   0   5 1136.60 344.882   8
   5   0   5 647.202 181.987  14
   5   0   5 899.210 161.169  26
   5   0   6 550.338 162.744  18
   5   0   6 687.622 148.742  26
   5   0   7 1550.50 191.691  18
   5   0   8 50.5399 75.4605  18
   5   1  -9 270.684 109.353  21
   5   1  -8 2256.42 199.406  23
   5   1  -8 2263.50 221.252  21
   5   1  -7 3586.56 248.197  23
   5   1  -7 3731.26 285.636  21
   5   1  -6 36215.8 1684.09   7
   5   1  -6 36205.7 995.985  23
   5   1  -6 38826.1 1071.27  21
   5   1  -5 3361.42 462.725   7
   5   1  -4 12961.1 866.560   7
   5   1  -3 1579.70 298.635  10
   5   1  -3 1488.64 286.872   7
   5   1  -2 6025.62 542.099  10
   5   1  -2 5952.36 506.051   7
   5   1  -1 72919.5 2107.25   7
  -5   1   1 73046.5 1989.75  11
  -5   1   0 24612.3 999.303  11
  -5   1  -1 9961.53 630.039  11
  -5   1  -2 5304.45 487.698  11
  -5   1  -3 266.376 176.283  11
   5   1   4 3909.20 319.538  14
   5   1   4 3850.16 300.595  26
  -5   1  -4 4555.97 501.908  11
   5   1   5 29865.5 1034.51  14
   5   1   5 30752.7 988.751  26
  -5   1  -5 28394.2 1336.83  11
   5   1   6 30316.0 1057.86  14
   5   1   6 31846.5 972.019  26
   5   1   7 496.051 128.288  18
   5   1   8 3477.20 215.284  18
   5   2  -9 613.725 126.602  21
   5   2  -8 400.711 124.919  21
   5   2  -7 10300.0 440.213  23
   5   2  -7 10926.5 481.283  21
   5   2  -6 60894.9 2336.28   7
   5   2  -6 59882.8 1493.19  23
   5   2  -6 62807.5 1553.00  21
   5   2  -5 17140.2 1064.67   7
   5   2  -4 16177.2 984.590   7
   5   2  -3 8146.16 642.000  10
   5   2  -3 8432.25 646.731   7
   5   2  -2 30609.5 1306.67  10
   5   2  -2 30086.4 1226.32   7
   5   2  -1 9363.69 712.111  10
   5   2  -1 9699.43 597.797   7
  -5   2   1 9589.82 561.249  11
  -5   2   0 5608.28 455.154  11
  -5   2  -1 11980.6 708.978  11
  -5   2  -2 37285.2 1438.12  11
  -5   2  -3 714.696 233.443  11
   5   2   4 5523.14 370.296  14
   5   2   4 5705.43 374.095  26
  -5   2  -4 5716.88 565.347  11
  -5   2  -5 2767.09 399.631  11
   5   2   5 2943.36 294.427  14
   5   2   5 3007.59 289.604  26
   5   2   6 5093.67 386.999  14
   5   2   6 6002.65 362.779  26
   5   2   7 569.654 131.689  18
   5   2   7 418.539 148.641  14
   5   2   7 593.311 112.146  26
   5   2   8 818.799 112.006  18
   5   3  -9 3043.87 221.179  21
  -5   3   8 3227.64 227.334  29
   5   3  -8 3293.42 253.849  21
   5   3  -7 23783.8 782.679  21
   5   3  -6 45987.2 1963.90   7
   5   3  -6 45693.3 1230.52  21
   5   3  -5 22358.4 1246.72   7
   5   3  -4 7494.60 634.185  10
   5   3  -4 7506.84 655.930   7
   5   3  -3 21158.7 1098.51  10
   5   3  -3 20092.2 1038.25   7
   5   3  -2 52834.9 1856.34  10
   5   3  -2 46847.2 1658.18   7
   5   3  -1 10831.5 786.380  10
  -5   3   1 10083.0 598.730  11
  -5   3   0 339.669 174.763  11
   5   3   0 384.999 262.507  10
  -5   3  -1 21639.0 1016.31  11
  -5   3  -2 13972.4 830.635  11
  -5   3  -3 1212.01 273.272  11
  -5   3  -4 260.091 182.025  11
   5   3   4 113.655 112.282  26
   5   3   5 3572.80 316.231  14
   5   3   5 4354.31 341.629  26
   5   3   6 24029.1 888.039  14
   5   3   6 26329.7 871.245  26
   5   3   7 6201.31 335.352  18
   5   3   7 6268.49 381.432  14
   5   3   7 6570.51 333.512  26
  -5   4   9 313.148 82.4631  29
   5   4  -9 291.220 94.8402  21
  -5   4   8 729.152 127.516  29
   5   4  -8 481.075 124.281  21
  -5   4   7 8134.30 399.002  29
   5   4  -7 7991.14 366.785  12
   5   4  -7 8177.95 403.093  21
  -5   4   6 10957.0 473.905  29
   5   4  -6 10827.1 896.843   7
   5   4  -6 10702.1 464.476  21
  -5   4   5 3147.94 237.976  29
   5   4  -5 3194.46 477.744   7
   5   4  -5 3958.15 307.917  13
   5   4  -4 13434.3 898.972  10
   5   4  -4 14849.4 953.344   7
   5   4  -3 49610.3 1857.56  10
   5   4  -3 45387.6 1737.82   7
   5   4  -2 3413.01 474.487  10
   5   4  -2 3296.27 379.733   7
  -5   4   1 1651.03 275.842  11
   5   4  -1 1499.65 324.858  10
   5   4   0 4280.41 520.876  10
  -5   4   0 4164.42 427.288  11
  -5   4  -1 31466.9 1305.66  11
  -5   4  -2 2844.48 387.386  11
  -5   4  -3 1448.76 311.795  11
   5   4   3 1226.73 159.552  16
   5   4   4 14371.7 644.828  26
  -5   4  -4 13401.6 916.605  11
   5   4   5 11013.4 535.399  14
   5   4   5 11845.0 566.522  26
   5   4   6 29142.7 974.961  14
   5   4   6 31034.4 971.521  26
   5   4   7 1998.32 182.115  18
   5   4   7 1839.11 213.072  14
   5   4   7 2252.43 195.206  26
  -5   5   9 680.738 101.184  29
  -5   5   8 1416.65 163.175  29
   5   5  -8 1159.83 153.372  21
  -5   5   7 8044.08 397.244  29
   5   5  -7 7172.97 371.092  21
  -5   5   6 18802.3 655.220  29
   5   5  -6 17131.9 1150.48   7
   5   5  -6 17479.3 609.165  12
   5   5  -6 16799.8 610.096  21
  -5   5   5 794.557 137.701  29
   5   5  -5 808.318 274.396   7
   5   5  -5 899.628 144.647  12
   5   5  -4 15391.1 1012.78  10
   5   5  -4 14568.4 968.068   7
   5   5  -3 1825.46 363.109  10
   5   5  -3 2215.19 362.493   7
   5   5  -2 49774.9 1906.26  10
   5   5  -2 43817.6 1642.06   7
   5   5  -1 13376.8 914.371  10
  -5   5   1 11753.7 729.884  11
   5   5   0 38053.5 1631.61  10
  -5   5   0 37299.9 1464.03  11
  -5   5  -1 13886.3 860.717  11
  -5   5  -2 3314.96 452.706  11
  -5   5  -3 2328.47 417.841  11
   5   5   3 1973.94 199.534  16
  -5   5  -4 5630.61 592.367  11
   5   5   5 12690.1 564.227  14
   5   5   5 14355.6 626.671  26
   5   5   6 4442.55 328.874  14
   5   5   6 5407.74 360.985  26
   5   5   7 4753.38 259.053  18
   5   5   7 4796.57 305.399  14
  -5   6   9 611.955 90.6195  29
  -5   6   8 4396.76 266.522  29
  -5   6   7 6100.62 347.056  29
   5   6  -7 5723.00 319.251  21
  -5   6   6 17782.3 645.258  29
   5   6  -6 16842.6 587.575  12
   5   6  -5 1713.59 399.045  10
  -5   6   5 1778.55 196.687  29
   5   6  -5 1852.83 183.863  12
   5   6  -4 11219.9 885.449  10
  -5   6   4 10980.9 470.984  29
   5   6  -4 10060.1 822.322   7
   5   6  -4 11754.9 531.334  13
   5   6  -4 10619.1 446.936  12
   5   6  -3 3770.65 524.650  10
   5   6  -3 3493.77 460.440   7
   5   6  -2 36128.3 1648.80  10
   5   6  -1 17477.6 1081.56  10
  -5   6   1 15967.6 903.634  11
   5   6   0 59004.9 2195.45  10
  -5   6   0 57577.9 2005.65  11
   5   6   1 16151.3 1053.78  10
  -5   6  -1 16500.9 983.762  11
   5   6   2 11772.3 470.894  16
   5   6   2 10329.1 495.598  25
  -5   6  -2 11736.7 851.413  11
  -5   6  -3 2596.63 418.437  11
   5   6   3 2289.03 215.837  16
   5   6   4 8861.34 439.909  16
   5   6   5 4457.42 341.047  26
   5   6   6 1212.15 169.794  14
   5   6   6 1311.06 192.151  26
   5   6   7 2244.16 191.836  14
   5   6   7 2482.45 189.142  26
  -5   7   8 119.305 87.4468  29
  -5   7   7 3907.74 266.881  29
  -5   7   6 19042.7 668.235  29
   5   7  -6 16593.5 579.513  12
   5   7  -5 3646.24 559.203  10
  -5   7   5 4146.34 296.857  29
   5   7  -5 4462.23 275.424  12
   5   7  -4 5848.76 662.193  10
  -5   7   4 6973.59 375.060  29
   5   7  -4 6332.67 345.778  12
   5   7  -3 7546.60 731.819  10
   5   7  -3 7959.94 404.518  13
   5   7  -3 7673.34 372.882  12
   5   7  -2 689.850 256.690  10
   5   7  -2 661.066 139.044  12
   5   7  -1 6065.03 661.149  10
  -5   7   1 5737.39 568.151  11
   5   7   0 7350.77 712.301  10
  -5   7   0 7471.92 653.525  11
   5   7   1 9648.84 831.613  10
  -5   7  -1 9254.45 744.852  11
   5   7   2 21150.6 701.989  16
   5   7   2 21004.0 748.035  25
  -5   7  -2 21379.8 1203.85  11
   5   7   3 5518.54 331.518  16
  -5   7  -3 5296.74 594.152  11
   5   7   4 1606.21 194.100  16
   5   7   5 17139.6 692.539  26
   5   7   6 871.455 139.130  14
   5   7   6 870.607 161.056  26
  -5   8   8 2824.34 190.530  29
  -5   8   7 2498.51 213.693  29
  -5   8   6 20700.8 712.165  29
  -5   8   5 1325.03 179.991  29
   5   8  -5 1202.18 153.735  12
   5   8  -4 2742.50 472.495  10
  -5   8   4 2983.07 251.649  29
   5   8  -4 2928.90 231.407  12
   5   8  -3 29406.3 1555.23  10
  -5   8   3 30300.0 898.641  24
   5   8  -3 27973.7 859.961  12
   5   8  -2 94151.2 3123.77  10
   5   8  -2 93779.7 2154.03  12
  -5   8   2 92699.2 2197.59  24
   5   8  -1 8137.28 779.422  10
   5   8  -1 7437.87 376.195  12
  -5   8   1 7813.87 399.087  24
  -5   8   1 6775.72 638.472  11
   5   8   0 22977.2 1319.54  10
   5   8   0 22178.9 704.883  12
  -5   8   0 22266.9 752.296  24
  -5   8   0 22371.6 1209.20  11
  -5   8  -1 1627.15 356.994  11
   5   8   1 2134.72 430.806  10
  -5   8  -2 1906.28 392.664  11
   5   8   2 1773.57 191.767  16
   5   8   2 1035.06 163.611  25
   5   8   3 5791.33 340.463  16
   5   8   4 10058.0 457.903  16
   5   8   5 230.662 139.173  26
   5   8   6 1011.20 151.739  26
  -5   9   7 986.669 139.529  29
  -5   9   6 5047.75 308.207  29
  -5   9   5 2328.69 221.346  29
   5   9  -5 2155.50 188.366  12
  -5   9   4 11023.8 497.472  29
  -5   9   4 10279.1 457.157  24
   5   9  -4 10575.8 442.520  12
  -5   9   3 570.663 136.374  24
   5   9  -3 547.379 132.357  12
   5   9  -2 11842.5 973.746  10
   5   9  -2 12218.2 489.150  12
  -5   9   2 11305.0 501.488  24
   5   9  -1 31308.6 1608.78  10
   5   9  -1 32286.6 916.506  12
  -5   9   1 31152.1 958.542  24
  -5   9   1 28858.8 1434.35  11
  -5   9   0 1165.70 295.150  11
   5   9   0 1582.95 388.552  10
  -5   9   0 1748.34 205.511  24
  -5   9  -1-44.4146 192.611  11
  -5   9  -1-58.1496 111.595  24
   5   9   2 2416.81 248.480  25
  -5   9  -2 3104.92 253.940  24
   5   9   2 2828.97 231.636  16
   5   9   3 2753.92 235.360  16
  -5   9  -3 2727.20 239.202  24
   5   9   4 382.042 123.766  16
  -5   9  -4 268.821 102.843  24
   5   9   5 6865.64 373.720  26
   5   9   6 101.188 79.7668  26
  -5  10   7 124.221 77.6291  29
  -5  10   6 96.3397 97.6654  29
  -5  10   5 924.023 155.367  29
   5  10  -5 956.121 130.243  12
  -5  10   4 12476.4 523.791  29
   5  10  -4 11803.7 464.026  12
   5  10  -3 7666.99 374.024  12
  -5  10   3 7209.70 398.441  24
   5  10  -2 2884.61 246.323  12
  -5  10   2 1921.46 214.240  24
  -5  10   1 955.094 171.607  24
  -5  10   0 40578.0 1159.19  24
  -5  10  -1 8916.07 441.935  24
   5  10   2 10706.2 452.007  16
  -5  10  -2 10616.4 477.472  24
   5  10   3 1431.42 170.769  16
  -5  10  -3 1344.10 172.102  24
   5  10   4 1667.83 172.158  16
   5  10   4 1384.31 175.876  26
  -5  10  -4 1586.01 156.321  24
   5  10   5 4658.34 269.773  26
  -5  11   6 2558.87 187.215  29
  -5  11   5 2322.42 202.235  29
  -5  11   4 1804.53 196.950  29
  -5  11   3 1339.34 176.816  29
  -5  11   3 1017.73 161.121  24
  -5  11   2 22674.3 763.926  24
  -5  11   1 13004.4 543.986  24
  -5  11   0 8233.70 422.112  24
  -5  11  -1 1560.14 188.580  24
   5  11   2 897.908 137.388  16
  -5  11  -2 945.350 152.973  24
   5  11   3 3463.32 231.194  16
  -5  11  -3 3833.80 239.520  24
   5  11   4 6750.92 303.793  16
   5  11   4 6201.13 307.999  26
  -5  12   5 203.250 87.1290  29
  -5  12   5 149.915 67.4519  22
  -5  12   4 7931.12 364.013  29
  -5  12   3 2573.85 215.476  29
  -5  12   2 15129.6 572.647  24
  -5  12   1 5288.13 318.774  24
  -5  12   0 570.052 130.656  24
  -5  12  -1 14099.5 527.455  24
   5  12   2 786.367 115.280  16
  -5  12  -2 640.703 122.472  24
   5  12   3 13435.5 447.959  16
  -5  12  -3 12909.1 433.745  24
  -5  13   4 3757.32 211.940  29
  -5  13   4 3433.76 191.462  22
  -5  13   3 3059.22 207.603  29
  -5  13   2 5076.42 271.213  29
  -5  13   2 4773.29 278.853  24
  -5  13   1 1679.39 177.156  24
  -5  13   0 5675.65 296.537  24
   5  13   1-303.722 134.315  25
  -5  13  -1 282.046 91.4442  24
   5  13   2 6885.10 271.279  16
  -5  13  -2 6762.68 285.622  24
  -5  14   2 943.615 106.472  29
  -5  14   1 178.770 72.0834  29
   5  14   0 1801.22 147.955  25
  -5  14   0 2618.50 169.378  24
   6 -13  -2 1703.68 144.446  17
   6 -13  -2 1508.34 131.339  20
   6 -13  -1 1624.46 138.709  20
   6 -13   0 2439.25 164.907  20
   6 -12  -4 2306.63 158.240  17
   6 -12  -3 1170.34 136.956  17
   6 -12  -3 1004.46 125.335  20
   6 -12  -2 384.494 102.165  20
   6 -12  -1 2730.95 207.277  20
   6 -12   0 2736.77 204.703  20
   6 -12   1 3200.11 207.299  20
   6 -12   2 6657.87 285.107  20
   6 -11  -5 3799.12 183.791  27
   6 -11  -5 3704.81 204.831  21
   6 -11  -4 1165.26 141.971  17
   6 -11  -3 7524.66 364.996  20
   6 -11  -2 3269.34 247.047  20
   6 -11  -1 567.666 133.376  20
   6 -11   0 12276.6 489.011  20
   6 -11   1 6915.85 337.662  20
   6 -11   2 1983.63 174.100  20
   6 -11   3 4450.64 226.536  20
   6 -10  -6 5246.99 225.281  27
   6 -10  -6 4933.39 233.309  21
   6 -10  -5 3484.19 220.066  17
   6 -10  -5 3887.18 206.054  27
   6 -10  -4 1374.82 168.547  17
   6 -10  -3 940.305 157.782  20
   6 -10  -2 5594.57 335.671  20
   6 -10  -1 4477.01 299.803  20
   6 -10   0 1733.35 197.856  20
   6 -10   1 183.772 108.069  20
   6 -10   2 21545.7 679.269  20
   6 -10   3 1462.85 153.259  20
   6 -10   4 1708.47 132.358  20
   6  -9  -7 3077.01 164.554  27
   6  -9  -7 3044.90 156.848  23
   6  -9  -7 2849.94 164.517  21
   6  -9  -6 6499.39 276.411  27
   6  -9  -6 6586.16 313.666  21
   6  -9  -5 3085.23 219.119  17
   6  -9  -5 3103.54 194.827  27
   6  -9  -4 7167.21 365.860  17
   6  -9  -4 7520.86 390.151  20
   6  -9  -3 1534.20 196.714  20
   6  -9  -2 3922.95 294.610  20
   6  -9  -1 6582.51 366.340  20
   6  -9   0 16831.0 666.191  26
   6  -9   0 18846.3 652.600  20
   6  -9   1 5060.95 323.701  26
   6  -9   1 6097.71 331.383  20
   6  -9   2 8916.39 482.580  18
   6  -9   2 9720.33 417.818  20
   6  -9   3 6359.20 381.217  18
   6  -9   3 6935.54 327.028  20
   6  -9   4 297.422 81.3863  20
   6  -9   4 339.664 108.329  18
   6  -9   5 3684.94 222.705  18
   6  -8  -7 3272.02 185.844  27
   6  -8  -7 3484.77 186.804  23
   6  -8  -7 3190.79 204.192  21
   6  -8  -6 5513.22 263.262  27
   6  -8  -6 5540.44 311.112  21
   6  -8  -5 2571.18 214.307  17
   6  -8  -4 1529.36 187.011  17
   6  -8  -4 1751.90 205.053  20
   6  -8  -3 2271.51 228.667  20
   6  -8  -2 61017.5 1614.65  26
   6  -8  -2 58801.2 1536.02  20
   6  -8  -1 12513.0 571.821  26
   6  -8  -1 11536.6 983.407   7
   6  -8   0 20553.0 761.923  26
   6  -8   0 22659.1 733.294  20
   6  -8   1 25120.5 923.172  18
   6  -8   1 24003.6 826.930  26
   6  -8   1 26735.1 805.453  20
   6  -8   2 4696.62 360.205  18
   6  -8   2 4234.67 286.825  26
   6  -8   2 5144.48 296.520  20
   6  -8   3 3679.56 308.170  18
   6  -8   3 3159.33 227.060  20
   6  -8   4 1586.54 196.249  18
   6  -8   4 1736.72 152.715  20
   6  -8   5 1275.32 154.365  18
   6  -7  -8 335.462 70.6791  27
   6  -7  -8 398.275 77.9374  23
   6  -7  -8 434.293 83.3526  21
   6  -7  -7 4633.33 236.535  27
   6  -7  -7 4633.70 234.261  23
   6  -7  -7 4648.64 266.229  21
   6  -7  -6 6937.60 313.865  27
   6  -7  -6 7506.33 379.531  21
   6  -7  -5 1893.98 199.877  17
   6  -7  -4 3427.35 259.467  17
   6  -7  -4 3592.60 283.109  20
   6  -7  -3 804.319 151.494  20
   6  -7  -3 296.790 231.189   7
   6  -7  -2 4530.41 333.103  26
   6  -7  -2 4280.78 597.919   7
   6  -7  -2 4529.72 299.637  20
   6  -7  -1 279.328 105.440  20
   6  -7  -1 244.488 121.720  26
   6  -7  -1 490.755 237.856   7
   6  -7   0 38062.9 1206.83  18
   6  -7   0 41288.8 1874.65   8
   6  -7   0 39203.1 1150.86  26
   6  -7   0 36561.9 1794.80   7
   6  -7   0 39872.7 1086.73  20
   6  -7   1 15151.0 673.443  18
   6  -7   1 16344.5 1121.04   8
   6  -7   1 15476.1 616.678  26
   6  -7   1 15605.8 570.519  20
   6  -7   2 4467.98 352.632  18
   6  -7   2 4215.82 296.011  26
   6  -7   2 4382.51 278.767  20
   6  -7   3 5672.39 377.792  18
   6  -7   3 6062.70 315.503  20
   6  -7   4 2822.66 263.208  18
   6  -7   5 62.6710 103.757  18
   6  -7   6 13911.4 484.112  18
   6  -6  -8 1081.16 113.825  27
   6  -6  -8 1078.17 114.878  23
   6  -6  -8 1004.48 123.001  21
   6  -6  -7 356.590 86.8770  27
   6  -6  -7 421.606 96.4251  23
   6  -6  -7 367.859 116.581  21
   6  -6  -6 12166.1 522.138  21
   6  -6  -5 6624.17 345.578  17
   6  -6  -4 10144.1 447.604  17
   6  -6  -4 10084.1 468.942  20
   6  -6  -3 1346.03 176.040  20
   6  -6  -3 1139.31 177.798  26
   6  -6  -3 985.086 299.194   7
   6  -6  -2 17702.8 684.153  26
   6  -6  -2 16614.4 1144.49   7
   6  -6  -2 17705.8 633.558  20
   6  -6  -1 36579.7 1067.86  26
   6  -6  -1 34295.7 1674.67   7
   6  -6  -1 34045.2 986.238  20
   6  -6   0 255.839 93.5729  20
   6  -6   0 169.142 105.460  18
   6  -6   0 248.825 232.730   8
   6  -6   0 173.183 115.859  26
   6  -6   0 203.164 230.839   7
   6  -6   1 12382.4 578.597  18
   6  -6   1 12926.8 989.841   8
   6  -6   1 12214.9 533.420  26
   6  -6   1 12300.9 483.219  20
   6  -6   2 45307.1 1329.61  18
   6  -6   2 44707.9 2017.88   8
   6  -6   2 43068.3 1237.14  26
   6  -6   2 45857.6 1180.52  20
   6  -6   3 1634.02 219.267  18
   6  -6   3 1488.65 179.788  26
   6  -6   4 1028.15 188.820  18
   6  -6   5 5261.07 333.135  18
   6  -6   6 420.950 112.389  18
   6  -5  -8 141.589 72.4800  27
   6  -5  -8 187.903 82.2236  23
   6  -5  -8 66.6804 79.8595  21
   6  -5  -7 703.857 111.724  27
   6  -5  -7 629.569 114.656  23
   6  -5  -7 624.742 140.619  21
   6  -5  -6 4117.26 299.149  21
   6  -5  -5 6024.79 330.347  17
   6  -5  -5 5041.06 630.231   7
   6  -5  -4 5648.05 323.233  17
   6  -5  -4 4815.19 628.843   7
   6  -5  -4 5237.13 329.266  20
   6  -5  -3 14750.7 553.024  17
   6  -5  -3 13345.0 573.044  26
   6  -5  -3 13796.3 1037.46   7
   6  -5  -3 14432.8 562.474  20
   6  -5  -2 7510.08 415.736  26
   6  -5  -2 7789.38 746.225   7
   6  -5  -2 7662.05 374.339  20
   6  -5  -1 5239.69 331.790  26
   6  -5  -1 5489.19 617.057   7
   6  -5   0 11303.7 545.588  18
   6  -5   0 13499.2 967.795   8
   6  -5   0 11051.2 520.238  26
   6  -5   0 11612.4 874.665   7
   6  -5   0 11909.1 461.127  20
   6  -5   1 4379.53 322.458  18
   6  -5   1 4605.53 596.967   8
   6  -5   1 4497.44 307.467  26
   6  -5   2 18048.2 707.143  18
   6  -5   2 18789.0 1230.38   8
   6  -5   2 16974.5 653.245  26
   6  -5   3 16663.5 683.331  18
   6  -5   3 15972.5 601.938  29
   6  -5   3 15416.4 606.014  26
   6  -5   4 357.122 152.607  18
   6  -5   4 259.648 108.144  29
   6  -5   5 4649.39 326.972  18
   6  -5   5 4137.94 264.525  29
   6  -5   6 6270.11 332.217  18
   6  -5   6 5696.73 276.561  29
   6  -4  -9 1086.66 109.064  23
   6  -4  -9 1075.87 115.353  21
   6  -4  -8 3393.42 208.070  27
   6  -4  -8 3798.06 217.958  23
   6  -4  -8 3750.49 253.524  21
   6  -4  -7 583.097 117.867  23
   6  -4  -7 418.018 122.906  21
   6  -4  -6 5356.73 341.295  21
   6  -4  -5 29288.8 873.939  17
   6  -4  -5 28052.6 1530.47   7
   6  -4  -4 6486.94 344.187  17
   6  -4  -4 6319.48 682.253   7
   6  -4  -3 4338.77 551.184   7
   6  -4  -2 11612.0 886.853   7
   6  -4  -1 22793.7 1241.79   7
   6  -4   0 17976.8 1099.97   8
   6  -4   0 16207.7 1012.88   7
   6  -4   1 5789.38 352.495  18
   6  -4   1 5484.19 639.978   8
   6  -4   1 5299.26 330.316  26
   6  -4   2 5320.33 352.943  18
   6  -4   2 5021.07 635.707   8
   6  -4   2 4714.39 319.169  26
   6  -4   3 5183.95 356.878  18
   6  -4   3 4722.83 628.844   8
   6  -4   3 4787.66 320.392  26
   6  -4   4 4213.79 321.873  18
   6  -4   4 4035.52 282.960  26
   6  -4   5 279.734 134.432  18
   6  -4   5 231.748 99.8638  29
   6  -4   6 12932.2 524.551  18
   6  -4   6 12056.2 437.152  29
   6  -3  -9 1075.89 114.051  23
   6  -3  -9 1256.41 132.967  21
   6  -3  -8 883.546 121.849  23
   6  -3  -8 677.687 134.954  21
   6  -3  -7 1720.43 171.272  23
   6  -3  -7 1368.53 194.093  21
   6  -3  -6 20859.3 743.823  21
   6  -3  -5 11217.2 467.571  17
   6  -3  -5 10513.9 911.939   7
   6  -3  -4 11103.8 468.902  17
   6  -3  -4 12055.9 925.598   7
   6  -3  -3 13078.3 947.425   7
   6  -3  -2 1742.82 352.545   7
   6  -3  -1 2883.74 433.140   8
   6  -3  -1 3771.25 471.704   7
   6  -3   0 3657.28 482.419   8
   6  -3   0 3003.72 413.572   7
   6  -3   1 5467.64 600.403   8
   6  -3   2 617.785 142.385  18
   6  -3   2 457.901 239.548   8
   6  -3   2 741.758 140.870  26
   6  -3   3 6228.92 383.965  18
   6  -3   3 6694.16 740.573   8
   6  -3   3 6297.37 375.424  26
   6  -3   4 758.652 162.629  18
   6  -3   4 647.634 140.905  26
   6  -3   5 2514.51 253.059  18
   6  -3   6 530.304 130.002  18
   6  -3   7 23866.2 696.114  18
[truncated: 724,371 more chars]
